# Supplementary material for: The ecology of immune state in a wild mammal, Mus musculus domesticus
Source: PubMed Central journal article supplement (PMC5919074; doi:10.1371/journal.pbio.2003538), 2018-04-13

# Supplementary Figure 2A

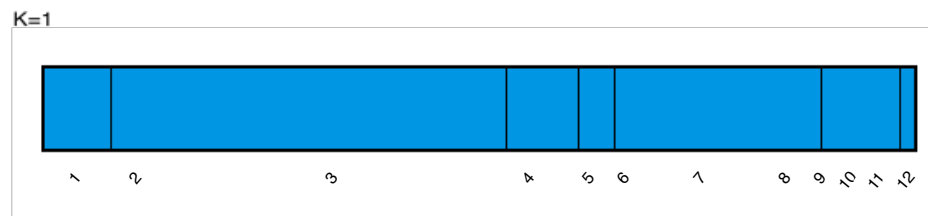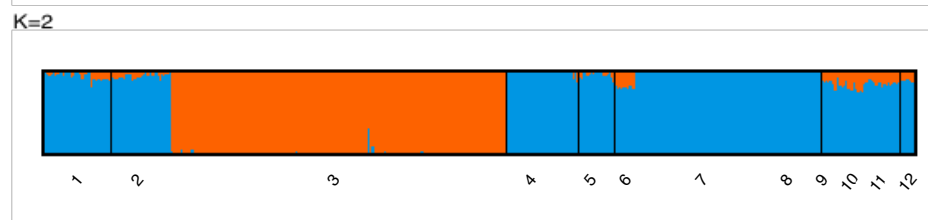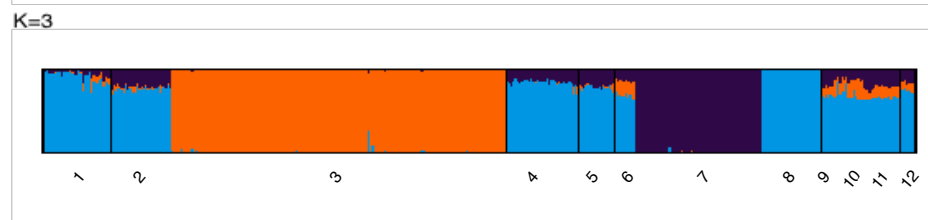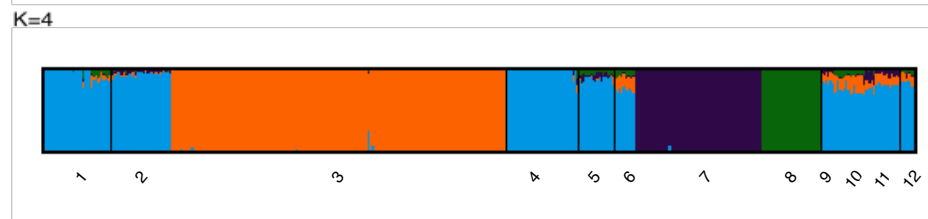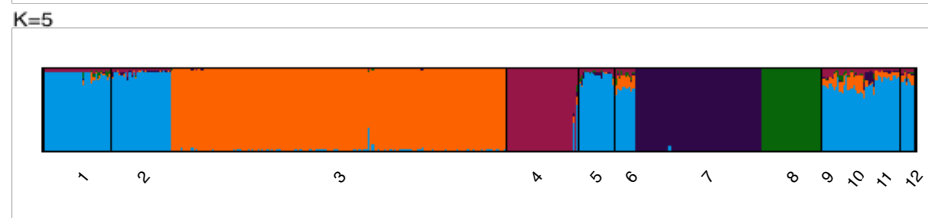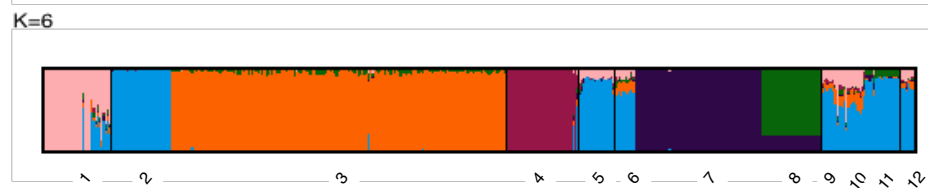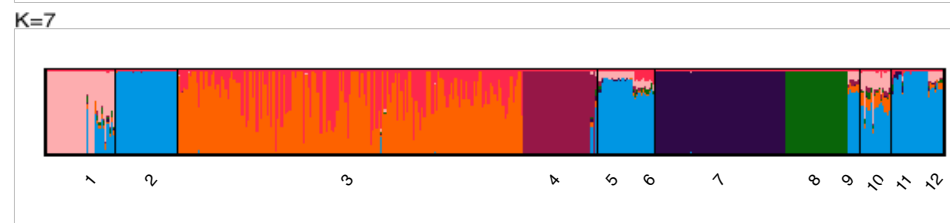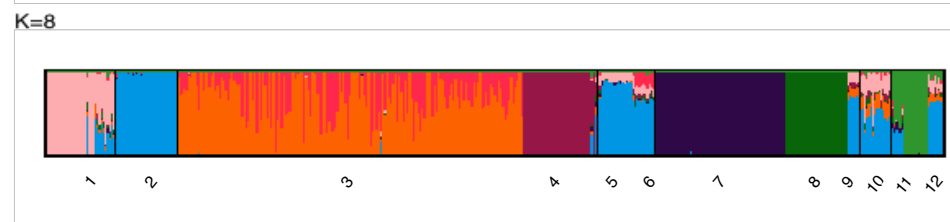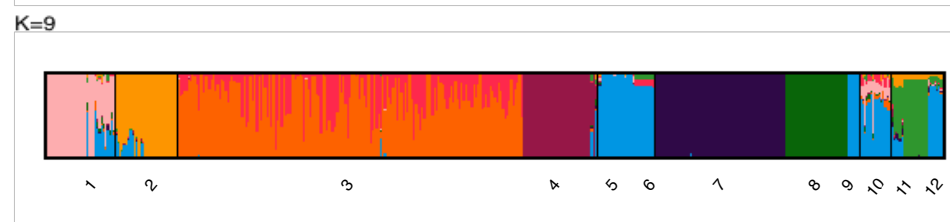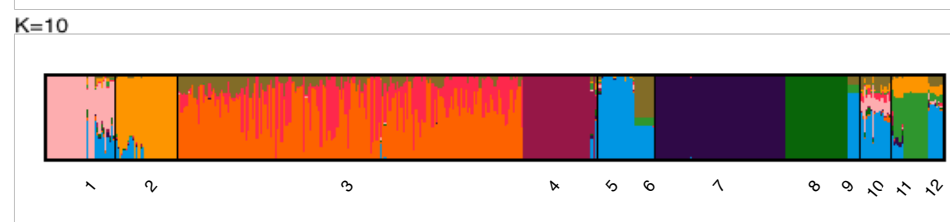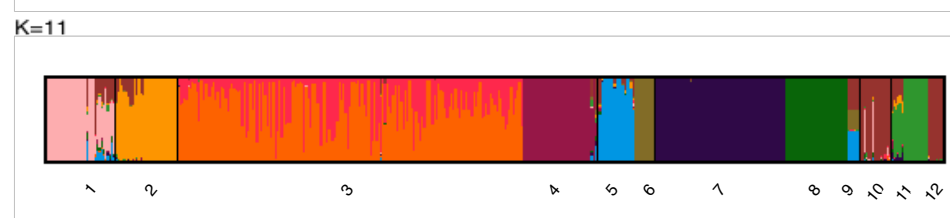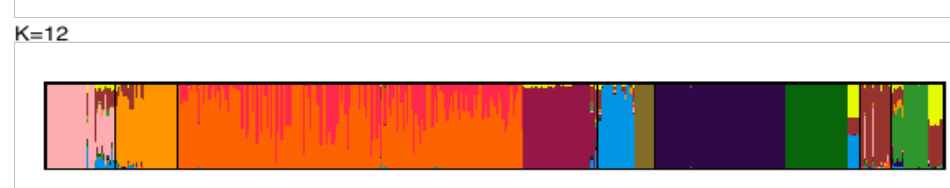

# Supplementary Figure 2B

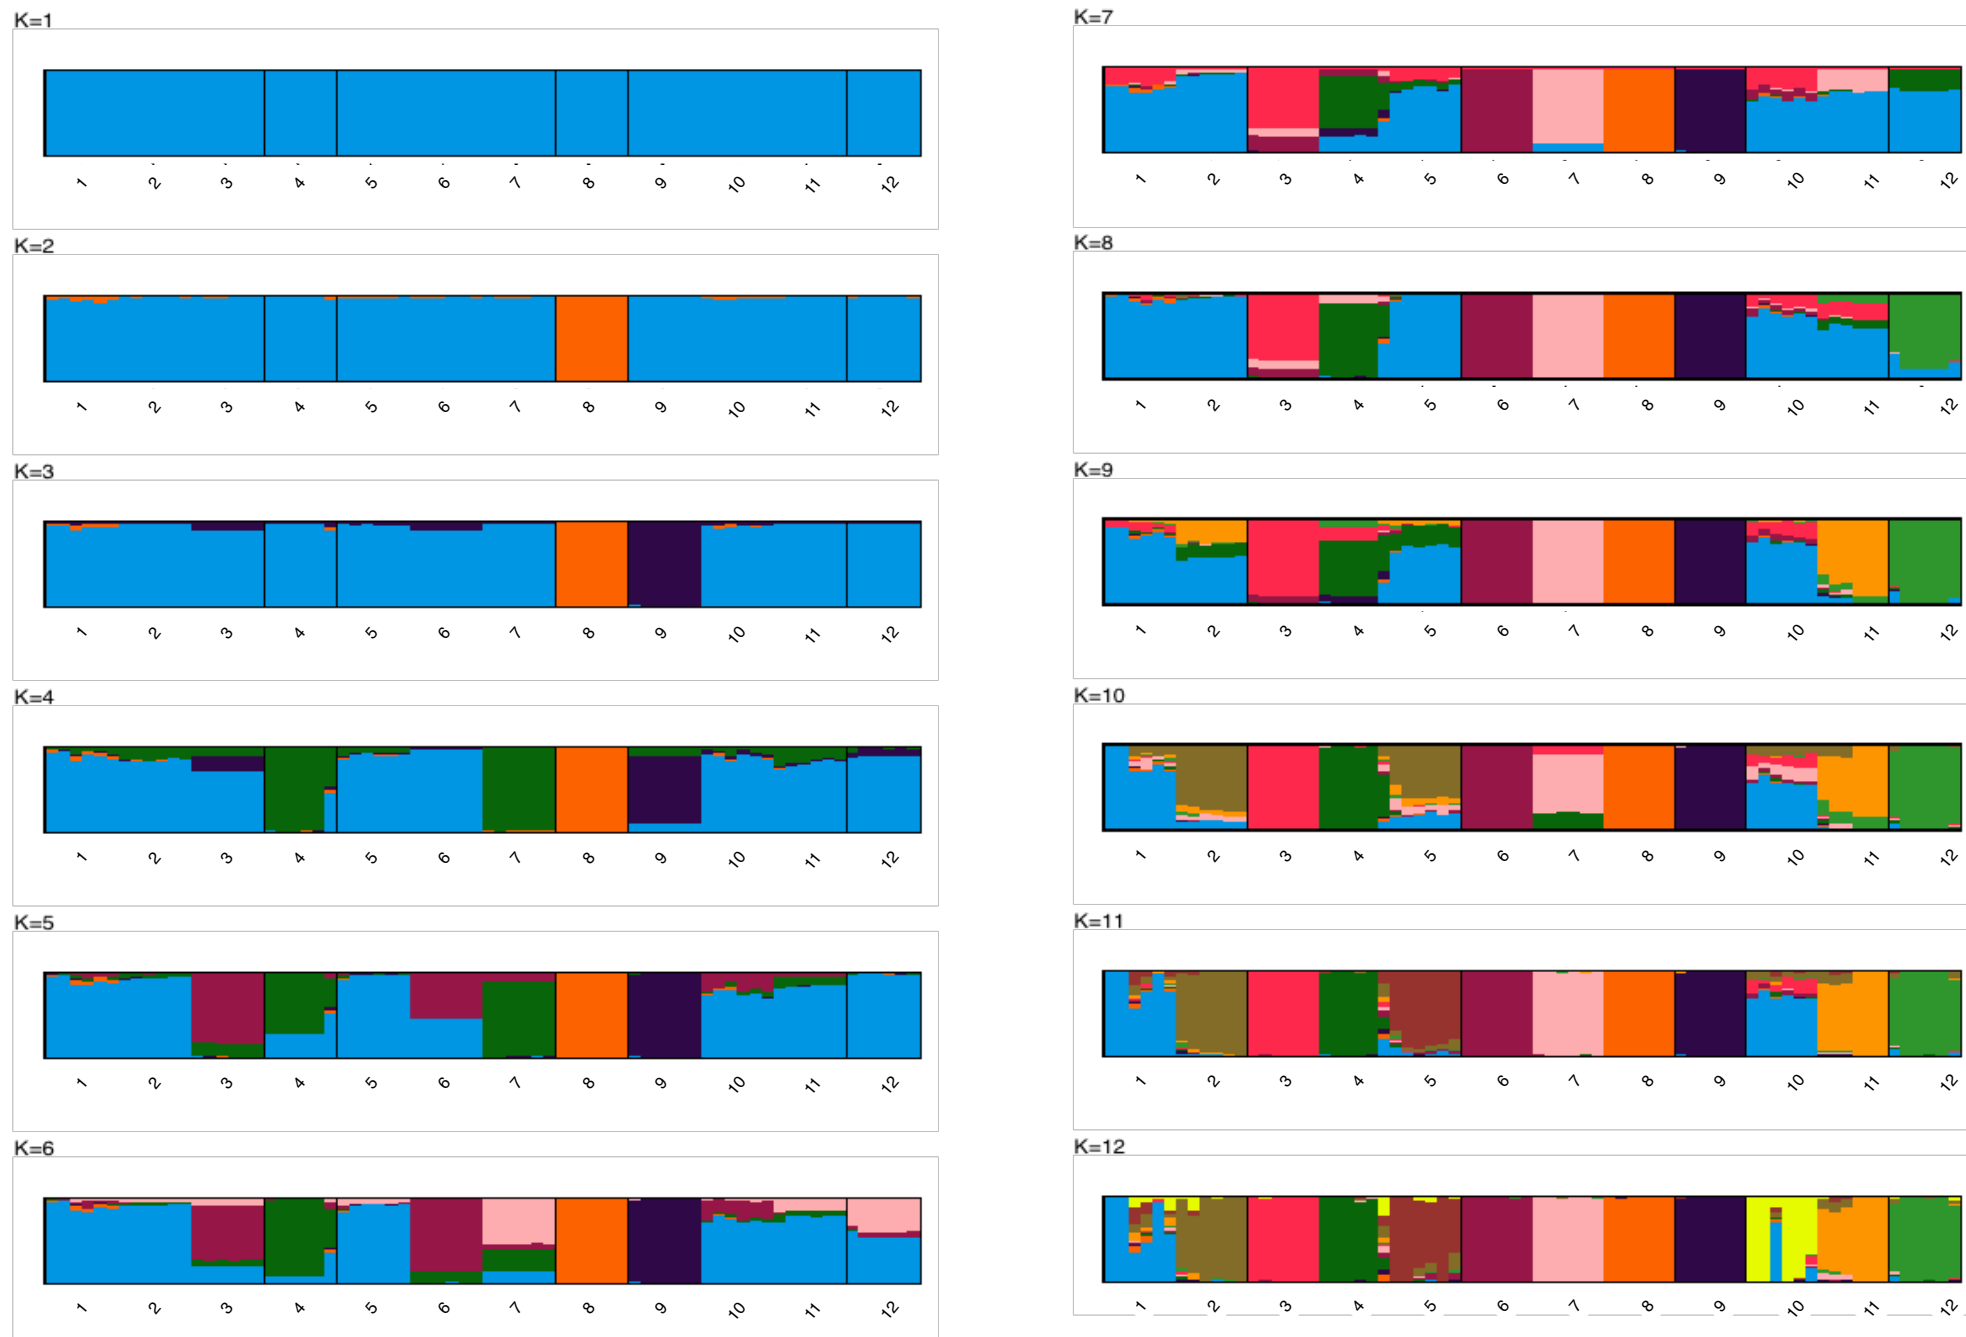

Supplement: pbio.2003538.s008.pdf [file pbio.2003538.s008.pdf]
