# Supplementary material for: The ecology of immune state in a wild mammal, Mus musculus domesticus
Source: PLoS Biol. 2018 Apr 13;16(4):e2003538. doi: 10.1371/journal.pbio.2003538 (PMC5919074; doi:10.1371/journal.pbio.2003538)
Supplement: S1 Data — Infection data for all 12 sample sites, (A) for each mouse, where column A is the mouse ID number; column B is the site designation as in Fig 1; columns C–I, inclusive, are serological evidence of microbial infection on a 0 to 4 scale, where 0 is the absence of a response, and 1, 2, 3, and 4 are all seropositive results in increasing degrees of positivity; column J is the total number of microbial infections; and columns K and L are the intensity of mite (M. pulmonis) and nematode (Syphacia sp.) infections, respectively; ND, not done; (B) summarized for each sample site where columns B–K, inclusive, show the prevalence of the 9 infections at each site (column A); and columns L and M show the mean intensity of infection with mites and worms, respectively. (XLSX) [file pbio.2003538.s001.xlsx]

## Sheet: (A) All data
ID	Site	Noro virus	Minute Virus	Parvo virus	Mouse Hepatitis Virus	Sendai virus	Corona virus	Mycoplasma pulmonis	Number of Viruses	Number of Mites (Mycoptes musculinus)	Number of Worms (Syphacia sp.)
1	BM	0	0	3	3	0	2	0	3	200	138
2	BM	0	0	1	2	0	1	0	3	0	9
7	BM	1	0	3	3	0	2	0	4	200	23
8	BM	0	0	3	3	0	2	0	3	200	270
10	BM	0	0	2	3	0	2	0	3	0	5
11	BM	0	0	3	0	0	1	0	2	200	30
12	BM	0	0	3	0	0	0	0	0	1000	18
13	BM	0	0	3	1	1	2	0	4	200	226
14	BM	ND	ND	ND	ND	ND	ND	ND	ND	0	5
15	BM	1	0	3	3	0	3	0	4	0	261
17	BM	0	0	3	2	0	0	0	2	200	139
19	BM	0	0	2	1	0	2	0	3	100	11
20	BM	0	1	3	3	1	2	0	5	0	40
28	BM	3	2	3	2	0	2	0	5	0	2
29	BM	0	0	3	0	0	2	0	2	0	1
30	BM	0	0	0	1	0	2	0	2	200	24
31	BM	0	2	3	3	1	2	0	5	100	0
32	BM	0	0	0	1	0	1	0	2	100	1
33	BM	ND	ND	ND	ND	ND	ND	ND	ND	0	10
34	BM	1	1	1	3	0	2	1	6	400	17
35	BM	1	0	3	1	1	1	1	6	0	10
41	BM	1	0	1	0	2	0	1	4	0	7
44	BM	ND	ND	ND	ND	ND	ND	ND	ND	200	4
46	BM	ND	ND	ND	ND	ND	ND	ND	ND	200	6
146	BM	0	0	2	2	0	2	1	4	0	27
149	BM	1	1	2	0	2	0	2	5	500	43
249	BM	0	0	3	3	0	3	0	3	100	6
250	BM	0	0	1	1	1	1	1	5	0	0
251	BM	ND	ND	ND	ND	ND	ND	ND	ND	0	41
252	BM	ND	ND	ND	ND	ND	ND	ND	ND	500	6
253	BM	0	1	3	0	0	2	1	4	0	0
254	BM	0	0	1	1	0	2	0	3	0	23
255	BM	0	0	2	2	1	2	1	5	0	2
256	BM	0	0	0	2	1	2	1	4	0	113
293	BM	0	0	1	2	0	1	0	3	0	5
3	HW	1	1	2	0	1	0	0	5	200	2
4	HW	ND	ND	ND	ND	ND	ND	ND	ND	500	14
5	HW	0	0	0	0	0	0	0	0	200	18
6	HW	0	0	1	0	0	0	0	1	200	128
9	HW	0	0	1	0	0	0	0	1	500	17
16	HW	0	0	0	0	0	0	0	0	200	2
18	HW	ND	ND	ND	ND	ND	ND	ND	ND	0	16
48	HW	0	0	1	0	1	0	1	3	500	3
49	HW	0	0	0	0	2	0	0	2	1500	0
50	HW	1	0	1	0	1	0	1	4	1500	0
51	HW	ND	ND	ND	ND	ND	ND	ND	ND	1000	3
52	HW	ND	ND	ND	ND	ND	ND	ND	ND	1500	0
53	HW	ND	ND	ND	ND	ND	ND	ND	ND	1500	4
54	HW	0	0	0	0	0	0	0	0	1500	33
55	HW	0	0	3	0	0	0	0	1	1500	81
57	HW	ND	ND	ND	ND	0	0	0	ND	1000	41
58	HW	1	0	3	0	1	0	1	4	0	113
67	HW	ND	ND	ND	ND	ND	ND	ND	ND	500	0
68	HW	1	1	2	0	2	0	1	5	500	2
69	HW	0	0	2	0	1	0	0	2	1500	29
70	HW	0	0	2	0	0	0	0	1	1000	91
71	HW	ND	ND	ND	ND	ND	ND	ND	ND	500	1
72	HW	0	0	2	0	1	0	1	3	1000	51
86	HW	1	0	2	0	0	0	0	2	200	18
87	HW	0	0	1	0	0	0	0	1	200	32
88	HW	1	0	3	0	1	0	1	4	0	109
89	HW	0	0	0	0	0	0	0	ND	300	33
90	HW	0	0	0	0	1	0	1	2	200	72
91	HW	1	0	2	0	1	0	1	5	200	6
93	HW	1	1	2	0	1	0	1	5	200	36
94	HW	ND	ND	ND	ND	ND	ND	ND	ND	200	58
95	HW	0	0	1	0	0	0	0	1	200	0
98	HW	ND	ND	ND	ND	ND	ND	ND	ND	200	0
103	HW	ND	ND	ND	ND	1	1	1	ND	500	0
105	HW	1	0	1	0	1	0	1	4	200	0
110	HW	ND	ND	ND	ND	ND	ND	ND	ND	200	14
111	HW	ND	ND	ND	ND	ND	ND	ND	ND	200	0
112	HW	ND	ND	ND	ND	ND	ND	ND	ND	200	6
116	HW	0	0	1	0	0	0	0	1	300	0
117	HW	ND	ND	ND	ND	ND	ND	ND	ND	1000	0
118	HW	1	0	1	0	0	0	0	2	500	48
119	HW	1	0	2	0	0	0	1	3	1000	0
120	HW	0	0	1	0	0	0	0	1	300	58
121	HW	0	0	1	0	0	0	0	1	1500	1
160	HW	0	0	2	0	0	0	0	1	1000	27
161	HW	ND	ND	ND	ND	ND	ND	ND	ND	2000	15
162	HW	0	0	1	0	1	0	1	3	500	110
163	HW	ND	ND	ND	ND	ND	ND	ND	ND	1000	78
165	HW	1	0	3	0	1	0	1	5	300	67
166	HW	1	0	3	0	1	0	1	5	300	50
167	HW	ND	ND	ND	ND	ND	ND	ND	ND	200	46
168	HW	0	0	1	0	1	0	1	3	300	37
169	HW	0	0	3	0	0	1	0	4	0	80
170	HW	0	0	2	0	1	0	1	3	400	49
171	HW	0	0	1	0	1	0	1	3	500	20
172	HW	0	0	1	0	1	1	1	5	1000	21
173	HW	0	0	1	0	1	0	0	3	200	7
174	HW	ND	ND	ND	ND	ND	ND	ND	ND	1500	35
175	HW	ND	ND	ND	ND	ND	ND	ND	ND	1000	4
176	HW	0	0	1	0	1	0	1	3	200	2
177	HW	1	1	3	1	0	1	0	4	400	18
178	HW	0	0	4	1	1	0	1	3	200	92
179	HW	ND	ND	ND	ND	ND	ND	ND	ND	1000	615
180	HW	0	0	0	0	0	0	0	0	1500	38
182	HW	0	0	1	0	1	0	1	3	500	165
198	HW	1	0	4	2	0	0	1	4	0	54
199	HW	0	0	1	0	0	0	1	3	300	55
200	HW	1	1	3	1	1	1	0	6	500	91
201	HW	1	0	2	0	1	0	1	5	200	66
202	HW	1	0	4	2	2	0	2	5	200	67
204	HW	ND	ND	ND	ND	ND	ND	ND	ND	100	254
208	HW	0	0	4	1	1	0	2	4	200	179
209	HW	1	0	4	2	1	0	2	4	200	100
213	HW	1	0	4	2	1	0	2	4	300	95
214	HW	0	0	4	1	1	0	1	4	ND	59
233	HW	1	0	4	2	1	0	1	5	500	7
234	HW	ND	ND	ND	ND	ND	ND	ND	ND	0	2
235	HW	0	0	2	0	1	0	1	4	100	28
236	HW	ND	ND	ND	ND	ND	ND	ND	ND	500	10
237	HW	1	0	4	2	1	0	1	4	200	123
238	HW	0	0	2	0	0	0	0	2	0	26
239	HW	0	0	0	0	0	0	0	0	0	67
240	HW	0	0	0	0	0	0	0	0	0	45
241	HW	0	0	4	1	0	0	1	2	1000	29
242	HW	0	0	3	0	0	0	0	1	0	8
243	HW	0	0	1	0	1	0	1	3	500	18
244	HW	1	0	3	0	1	0	1	4	1000	136
245	HW	0	0	3	0	1	0	1	4	0	127
246	HW	0	0	2	0	0	0	0	1	1000	116
247	HW	0	0	4	1	0	0	0	1	1000	100
248	HW	0	0	1	0	1	0	1	3	200	34
275	HW	0	0	1	0	0	0	0	1	500	166
276	HW	0	0	0	0	0	0	0	ND	0	5
277	HW	0	0	4	1	0	0	0	2	500	46
278	HW	0	0	4	1	1	0	0	2	500	614
279	HW	0	0	3	0	1	0	0	2	500	74
280	HW	0	0	2	0	1	1	0	4	500	223
281	HW	1	0	4	3	1	0	0	4	500	64
282	HW	0	0	4	1	0	0	1	2	500	317
283	HW	1	0	1	0	1	0	1	5	500	0
284	HW	2	1	4	3	2	0	1	5	100	156
285	HW	1	1	4	3	1	0	1	5	500	42
286	HW	0	0	4	1	0	0	0	1	500	18
287	HW	0	0	4	1	1	0	0	2	1000	40
288	HW	0	0	4	1	0	1	0	2	500	248
289	HW	0	0	3	0	0	0	0	1	0	0
305	HW	1	0	2	0	1	0	1	4	500	8
306	HW	0	0	1	0	0	0	0	1	500	15
307	HW	0	0	4	1	1	0	0	2	200	25
308	HW	0	0	4	1	1	0	1	4	1000	2
309	HW	0	0	4	1	1	0	1	3	500	19
314	HW	2	1	2	0	1	0	1	5	1000	62
341	HW	0	0	4	1	0	0	0	2	0	41
342	HW	0	0	4	1	0	0	0	1	0	52
343	HW	0	0	4	1	1	0	1	3	100	29
344	HW	0	0	3	0	1	0	1	3	100	17
345	HW	0	0	2	0	1	0	0	2	1500	119
346	HW	ND	ND	ND	ND	ND	ND	ND	ND	1500	52
347	HW	0	0	1	0	0	0	0	1	1500	13
348	HW	0	0	1	0	0	0	0	1	1500	70
372	HW	ND	ND	ND	ND	ND	ND	ND	ND	200	21
373	HW	0	0	0	0	1	0	0	2	500	1
374	HW	ND	ND	ND	ND	ND	ND	ND	ND	300	23
375	HW	0	0	1	0	0	0	0	2	1500	287
376	HW	0	0	3	0	0	0	0	2	2000	85
377	HW	1	0	3	0	0	1	1	5	200	173
378	HW	1	2	3	1	2	0	0	4	100	56
379	HW	0	0	3	0	0	0	0	1	200	77
380	HW	0	0	2	0	0	0	0	1	200	83
381	HW	ND	ND	ND	ND	ND	ND	ND	ND	200	39
382	HW	0	0	3	0	1	0	1	3	200	15
383	HW	0	0	3	0	0	0	0	1	400	58
384	HW	1	0	2	0	0	0	1	4	0	19
385	HW	0	0	0	0	1	2	0	2	300	26
386	HW	1	0	3	0	0	0	0	2	200	84
387	HW	1	1	3	1	1	0	1	5	ND	266
388	HW	1	1	3	1	1	0	1	5	200	55
389	HW	2	2	3	1	1	0	2	6	200	267
390	HW	2	2	3	1	1	1	1	7	200	126
391	HW	0	1	3	0	1	0	0	4	200	2
392	HW	2	2	2	0	1	0	1	6	500	135
409	HW	0	0	3	0	1	0	1	3	0	310
410	HW	1	0	2	0	1	0	1	4	200	394
411	HW	0	1	2	0	1	0	1	4	0	31
412	HW	0	0	2	0	0	0	0	1	0	6
413	HW	1	0	1	0	0	0	1	4	20	120
414	HW	0	0	3	0	1	0	1	3	200	14
415	HW	0	0	3	0	1	0	1	3	20	102
416	HW	1	1	3	1	1	0	1	5	100	68
417	HW	0	0	3	0	1	0	1	3	400	5
418	HW	0	0	3	0	1	0	1	3	400	29
419	HW	0	0	3	0	1	0	1	3	ND	158
420	HW	1	0	3	0	1	1	1	6	400	70
421	HW	0	1	2	0	1	0	1	4	400	13
422	HW	0	0	0	0	1	0	1	2	0	40
423	HW	0	0	3	0	0	0	1	2	1000	34
424	HW	0	0	3	0	1	0	1	3	30	153
425	HW	0	0	3	0	1	0	1	3	100	119
426	HW	0	0	3	0	1	0	1	3	0	30
427	HW	0	0	3	0	1	0	1	3	100	11
428	HW	0	0	2	0	1	0	1	3	0	95
429	HW	0	0	1	0	0	0	1	2	100	100
430	HW	0	0	3	0	1	0	1	3	0	17
431	HW	0	1	1	0	1	0	1	4	0	42
432	HW	1	0	3	0	1	0	1	5	200	40
433	HW	1	1	1	0	2	0	1	6	0	0
434	HW	1	1	3	1	2	0	2	6	100	0
435	HW	1	1	3	1	1	0	1	6	0	691
436	HW	1	1	3	1	1	0	1	6	300	115
437	HW	1	1	1	0	1	0	1	5	0	40
438	HW	0	0	3	0	1	0	1	3	300	222
439	HW	0	0	3	0	1	0	1	3	100	43
440	HW	1	1	3	1	1	0	1	6	200	77
443	HW	1	1	3	1	1	0	1	5	1	62
444	HW	1	1	3	1	1	0	1	5	200	132
445	HW	1	1	1	0	1	0	1	5	100	16
446	HW	1	1	3	1	2	0	1	6	0	0
447	HW	1	1	3	1	1	0	1	6	200	404
448	HW	1	1	3	1	1	0	1	5	100	102
449	HW	1	1	3	1	1	0	1	6	0	38
450	HW	1	1	3	1	2	0	1	5	0	108
21	LU	3	0	3	3	0	2	0	4	0	0
22	LU	3	0	0	1	0	1	0	3	0	0
261	LU	2	1	2	1	1	1	1	7	0	0
262	LU	ND	ND	ND	ND	ND	ND	ND	ND	0	0
263	LU	1	0	1	1	0	0	1	4	1	0
264	LU	ND	ND	ND	ND	ND	ND	ND	ND	0	0
265	LU	2	0	3	2	0	1	1	5	0	0
266	LU	2	0	1	1	1	1	1	6	0	0
267	LU	3	1	3	2	1	1	1	7	0	0
268	LU	ND	ND	ND	ND	ND	ND	ND	ND	0	0
269	LU	ND	ND	ND	ND	ND	ND	ND	ND	0	0
270	LU	1	0	1	1	1	1	1	6	1	0
271	LU	3	0	3	3	1	2	1	6	50	0
272	LU	3	3	2	2	0	2	1	6	10	0
273	LU	3	2	3	3	1	2	2	7	0	0
274	LU	3	0	3	2	1	2	1	6	1000	0
441	LU	2	3	3	1	1	2	1	7	0	0
442	LU	2	0	0	3	1	3	1	5	0	0
23	WF	2	0	1	2	1	1	0	5	0	0
45	WF	1	0	3	0	2	0	1	4	0	83
47	WF	2	0	3	0	2	0	1	4	0	37
81	WF	ND	ND	ND	ND	ND	ND	ND	ND	300	19
82	WF	1	0	1	0	1	0	1	4	500	10
85	WF	3	3	3	1	2	0	2	6	0	1
257	WF	0	3	3	1	1	0	0	4	100	76
258	WF	1	1	3	1	1	0	1	6	0	192
259	WF	1	2	2	0	1	0	1	5	100	139
260	WF	0	3	1	0	0	0	0	2	100	37
290	WF	0	2	3	0	0	0	1	3	100	44
291	WF	ND	ND	ND	ND	ND	ND	ND	ND	100	156
292	WF	ND	ND	ND	ND	ND	ND	ND	ND	200	124
294	WF	0	2	3	1	0	0	1	4	100	173
303	WF	0	0	0	0	0	0	1	1	500	213
393	WF	3	3	3	1	3	0	2	6	500	213
394	WF	1	1	1	1	1	0	1	6	1000	238
395	WF	1	1	1	0	1	0	1	5	500	273
26	GL	2	0	3	0	0	0	0	2	0	115
36	GL	3	0	3	0	0	0	0	2	200	103
37	GL	1	0	2	0	0	0	0	2	200	20
38	GL	2	0	3	0	0	1	0	3	200	340
39	GL	0	0	0	0	0	0	0	0	1000	0
40	GL	1	1	2	0	1	0	0	4	1500	9
43	GL	0	0	2	0	0	0	0	1	100	86
59	GL	2	0	1	1	0	1	0	4	0	14
60	GL	0	0	0	0	0	0	0	ND	500	39
61	GL	3	0	3	0	1	1	2	5	200	55
62	GL	2	0	3	0	0	0	1	3	100	68
63	GL	1	0	0	0	1	0	0	2	0	188
66	GL	ND	ND	ND	ND	ND	ND	ND	ND	500	337
74	GL	1	0	0	0	0	0	0	1	1000	107
75	GL	1	0	2	0	1	0	0	3	500	221
79	GL	1	0	1	0	0	1	0	3	0	283
197	GL	0	0	0	0	0	0	0	4	100	16
203	GL	2	0	0	0	0	0	0	1	0	108
205	GL	2	1	3	0	0	0	0	3	0	80
206	GL	3	0	0	0	0	0	0	1	0	9
207	GL	0	0	4	0	0	0	1	2	0	1
210	GL	2	1	3	0	1	1	0	5	100	18
211	GL	3	0	1	0	1	0	2	4	200	15
212	GL	3	0	0	1	0	0	1	3	0	5
215	GL	2	0	1	0	1	0	1	4	ND	22
216	GL	1	0	1	0	1	0	2	4	ND	38
222	GL	0	0	4	0	0	0	0	1	0	0
223	GL	0	0	4	1	0	0	0	2	0	142
224	GL	1	0	0	0	0	0	0	1	0	2
226	GL	2	0	0	0	1	0	1	3	0	246
227	GL	1	0	0	0	1	0	0	2	2	162
228	GL	1	0	0	0	0	0	0	1	0	36
229	GL	1	0	1	0	1	0	1	4	0	8
27	WT	0	0	1	0	0	0	0	1	1500	0
42	WT	3	3	3	1	0	0	0	4	0	87
100	WT	1	1	3	0	0	0	0	3	200	73
101	WT	0	0	2	0	0	0	0	1	1000	0
102	WT	2	2	3	0	0	0	0	3	200	8
122	WT	1	3	3	0	0	0	0	3	200	122
123	WT	ND	ND	ND	ND	ND	ND	ND	ND	300	90
124	WT	1	0	1	0	0	0	0	2	200	275
56	PF	ND	ND	ND	ND	ND	ND	ND	ND	1000	4
64	PF	0	0	1	0	0	0	0	1	200	0
65	PF	0	0	1	0	0	0	0	1	300	5
73	PF	1	1	1	0	1	0	1	5	1000	1
92	PF	ND	ND	ND	ND	ND	ND	ND	ND	200	0
187	PF	0	0	0	0	1	0	1	2	300	129
188	PF	0	0	0	0	1	0	1	2	100	133
189	PF	0	0	0	0	1	0	1	2	200	236
190	PF	0	0	0	0	1	0	1	2	300	150
192	PF	1	0	1	0	1	0	1	4	0	35
76	ST	1	0	1	0	1	0	0	3	1500	17
77	ST	1	1	1	0	1	0	1	5	0	0
78	ST	1	0	2	2	1	1	1	6	300	30
80	ST	0	0	1	0	0	0	1	2	200	33
83	ST	0	0	0	0	0	0	0	0	300	161
84	ST	0	0	0	0	0	0	0	0	300	0
145	ST	1	0	2	1	0	0	0	3	200	0
147	ST	1	0	1	2	0	0	1	4	500	38
148	ST	1	1	1	1	1	0	1	6	300	97
151	ST	0	0	0	0	1	1	1	3	200	223
154	ST	1	0	3	0	1	0	1	4	300	128
181	ST	0	0	4	0	1	0	1	3	200	2
183	ST	1	1	3	2	2	2	2	7	100	96
231	ST	0	0	4	0	1	0	1	3	0	116
232	ST	0	0	1	2	1	1	1	5	1000	33
96	JB	0	0	2	0	0	0	0	1	0	9
97	JB	1	0	3	0	0	1	0	3	200	56
99	JB	1	0	3	1	1	0	2	5	0	17
104	JB	ND	ND	ND	ND	0	0	0	ND	2000	33
106	JB	1	0	3	1	1	2	0	5	0	40
107	JB	0	0	2	0	0	0	0	1	500	42
108	JB	1	0	2	0	0	1	0	3	0	0
109	JB	ND	ND	ND	ND	ND	ND	ND	ND	1000	21
113	JB	ND	ND	ND	ND	ND	ND	ND	ND	200	0
114	JB	0	0	0	0	0	0	0	0	1000	0
115	JB	0	0	1	0	0	0	0	1	300	9
184	JB	1	0	1	0	1	0	1	4	500	32
185	JB	0	0	0	0	0	0	0	0	300	17
186	JB	0	0	0	0	1	0	1	2	200	102
191	JB	1	0	1	0	1	0	1	4	0	94
193	JB	0	0	2	0	0	0	0	1	0	15
195	JB	1	0	1	0	2	0	2	4	100	26
196	JB	0	0	1	0	1	0	1	3	0	17
217	JB	ND	ND	ND	ND	ND	ND	ND	ND	0	0
218	JB	1	0	1	0	0	1	0	3	0	15
219	JB	0	0	1	1	0	0	0	2	ND	1
220	JB	0	0	0	0	0	0	0	0	0	0
221	JB	0	0	0	0	1	0	2	2	0	1
225	JB	0	0	0	0	1	0	0	1	0	25
310	JB	1	0	3	0	1	0	1	4	500	39
311	JB	1	2	4	0	1	0	1	5	0	26
312	JB	0	0	3	0	1	1	1	4	100	96
313	JB	2	2	2	0	3	0	1	5	100	82
402	JB	1	1	1	0	1	0	1	5	1	9
403	JB	0	0	2	0	0	0	0	1	0	24
404	JB	0	0	3	0	0	0	1	2	0	57
405	JB	0	0	3	0	0	0	0	1	0	46
406	JB	0	1	3	0	1	0	1	4	0	0
407	JB	0	1	1	0	0	0	1	3	0	0
408	JB	0	1	3	1	2	0	1	5	0	26
454	JB	1	1	1	0	1	0	1	5	0	0
128	PH	0	2	3	0	0	0	0	2	500	44
129	PH	0	0	1	0	0	0	0	1	200	69
130	PH	0	0	3	0	0	1	2	3	ND	94
131	PH	0	0	3	0	0	0	1	2	0	71
132	PH	0	1	3	0	0	0	0	2	200	34
136	PH	0	1	2	0	0	0	0	2	200	35
138	PH	1	1	2	0	1	0	1	5	500	78
139	PH	0	1	2	0	0	0	1	3	500	41
140	PH	0	3	3	0	0	0	0	2	300	86
142	PH	1	0	3	2	1	0	0	4	200	92
143	PH	0	0	2	0	0	0	1	2	300	68
194	PH	0	0	4	0	0	0	0	1	100	265
230	PH	ND	ND	ND	ND	ND	ND	ND	ND	0	48
295	PH	0	3	4	2	0	0	0	3	100	52
297	PH	0	0	4	2	0	0	0	2	200	142
298	PH	0	3	4	1	0	0	1	4	100	171
302	PH	0	3	4	1	1	0	1	5	100	33
316	PH	1	0	4	0	1	0	1	4	100	55
317	PH	2	3	2	0	1	0	1	5	0	56
318	PH	1	0	4	0	1	0	1	4	200	60
320	PH	1	1	3	2	1	0	2	6	200	86
321	PH	ND	ND	ND	ND	ND	ND	ND	ND	500	44
324	PH	1	0	3	2	1	0	1	5	200	298
328	PH	1	0	4	0	1	0	1	4	100	64
329	PH	0	0	3	0	1	0	0	2	0	44
331	PH	0	3	2	0	0	0	0	2	0	205
336	PH	0	3	4	0	0	0	0	2	1000	47
337	PH	1	3	4	0	2	0	1	5	1000	60
340	PH	1	1	4	1	1	0	0	5	200	108
396	PH	1	2	3	0	2	0	2	5	300	61
397	PH	0	1	3	0	0	0	1	3	1500	115
399	PH	3	3	3	0	3	0	3	5	0	304
401	PH	0	1	3	0	1	0	1	4	20	115
451	PH	1	3	3	2	1	0	1	6	50	92
452	PH	0	3	3	1	1	0	1	5	50	135
150	SP	0	0	0	0	1	0	1	2	300	0
155	SP	ND	ND	ND	ND	ND	ND	ND	ND	500	0
156	SP	0	0	1	0	1	0	1	3	0	0
157	SP	0	0	0	0	0	0	0	0	200	2
158	SP	0	0	0	0	0	0	1	1	1000	0
159	SP	2	1	1	0	1	1	1	6	300	0
350	SK	0	0	4	1	1	0	1	4	0	0
351	SK	0	0	0	1	0	0	0	1	0	0
352	SK	0	0	0	0	0	0	0	0	0	0
353	SK	0	0	2	0	1	0	0	2	0	0
354	SK	0	0	0	0	1	0	0	1	0	0
355	SK	0	0	0	0	0	0	0	0	0	0
356	SK	0	0	4	1	0	0	2	3	0	0
357	SK	0	0	0	0	0	0	1	1	0	0
358	SK	2	0	0	2	0	0	1	3	0	0
359	SK	2	0	0	2	0	0	0	2	0	0
360	SK	0	0	0	1	0	0	0	1	0	0
361	SK	1	0	1	1	0	0	1	4	0	0
362	SK	0	0	0	0	1	0	1	2	0	0
363	SK	0	0	4	1	1	0	0	3	0	0
364	SK	0	0	4	1	1	0	1	4	0	0
365	SK	0	0	2	1	1	0	1	4	0	0
366	SK	0	0	4	1	1	0	1	4	0	0
367	SK	0	0	3	1	1	0	1	4	0	0
368	SK	0	0	1	1	1	0	1	4	0	0
369	SK	0	0	4	2	1	0	0	3	0	0
370	SK	0	0	0	0	ND	ND	ND	ND	0	0
371	SK	0	0	4	1	0	0	0	2	0	0
455	SK	0	3	3	2	1	0	1	5	0	0
456	SK	0	3	3	1	1	0	1	5	200	0
457	SK	1	3	3	2	1	0	1	6	0	0
458	SK	1	2	3	2	1	2	1	7	0	0
459	SK	1	2	3	3	1	0	1	6	0	0
460	SK	1	2	3	2	1	0	1	6	3	0
461	SK	0	3	3	3	1	0	1	5	0	0
462	SK	1	3	3	3	1	0	1	6	0	0
463	SK	1	1	3	1	1	0	1	6	20	0
464	SK	2	2	3	1	1	0	1	6	0	0

## Sheet: (B) Summary
	Prevalence										Mean Intensity
Site	Noro virus	Minute Virus	Parvo virus	Mouse Hepatitis Virus	Sendai virus	Corona virus	Mycoplasma pulmonis	Any virus	Mites (Mycoptes musculinus)	Worms (Syphacia sp.)	Mycoptes musculinus	Syphacia sp.
BM	24.1379	20.6897	89.6552	79.3103	31.0345	86.2069	31.0345	96.5517	45.7143	91.4286	140.625	47.5938
HW	37.2549	21.5686	91.5033	29.4118	65.1613	7.09677	61.2903	96.0265	83.1461	90.6077	425.286	79.8659
LU	100	30.7692	84.6154	100	61.5385	92.3077	84.6154	100	27.7778	0	212.4	0
WF	66.6667	66.6667	93.3333	46.6667	73.3333	6.66667	80	100	72.2222	94.4444	241.176	119.294
GL	75	9.375	62.5	9.375	34.375	15.625	28.125	100	51.6129	93.9394	186.276	93.3226
WT	71.4286	57.1429	100	14.2857	0	0	0	100	87.5	75	183.333	109.167
PF	25	12.5	50	0	75	0	75	100	90	80	400	86.625
ST	53.3333	20	80	40	66.6667	26.6667	73.3333	86.6667	86.6667	80	408.333	81.1667
JB	40.625	21.875	81.25	12.5	51.5152	15.1515	51.5152	90.625	42.8571	77.7778	214.852	34.8929
PH	40.625	71.875	100	37.5	50.7937	3.1746	60.3175	100	81.5385	93.9394	290.492	59.8226
SP	20	20	40	0	60	20	80	80	80	16.6667	460	2
SK	4.34783	4.34783	9.09091	12.5	9.09091	3.22581	9.09091	33.3333	3.33333	0	110	0
