# Supplementary material for: The ecology of immune state in a wild mammal, Mus musculus domesticus
Source: PLoS Biol. 2018 Apr 13;16(4):e2003538. doi: 10.1371/journal.pbio.2003538 (PMC5919074; doi:10.1371/journal.pbio.2003538)
Supplement: S2 Data — For (A) all 12 sample sites combined, and sample sites (B) GL, (C) PH, and (D) SK, correlations (2-tailed) among measures of infection, condition, and immune measures, with males above the diagonal and females below the diagonal. In all, cells are colour coded as red for p < 0.01 and green for 0.01 < p < 0.05. Daylight is a measure of the Season when mice were caught, specifically the number of minutes of daylight between sunrise and sunset; Age is mouse age in weeks; Mites is the number of mites, Microbe is the number of microbial infections; Worms is the number of Syphacia sp.; BMI and SMI are the body mass index and the scaled mass index, respectively; Ab Fat is the mass of abdominal fat; Leptin is its serum concentration; Haemoglobin is its concentration; immunoglobulin (Ig) G, IgE and IgA are the concentration of these antibodies as described in [1]; and the numbers of CD4+ T cells, CD8+ T cells, CD19+ B cells, NKp46+ natural killer (NK) cells, Ly6G+ neutrophils, CD11c+ dendritic cells (DCs), and F4/80+ macrophages, which have all been scaled (prefix ‘s’) as for SMI, all as described in the Methods. Note, in (D) sample site SK, the mice were not infected with worms (see S1 Data), and there was a too small sample size for measurement of IgA concentrations, shown as not done (ND). (XLSX) [file pbio.2003538.s002.xlsx]

## Sheet: (A) All sites
		Daylight	Age	Mass	Mites	Microbe	Worms	BMI	SMI	Ab Fat	Leptin	Haemoglobin	IgG	IgE	IgA	sCD4	sCD8	sCD19	sNKp46	sLy6G	sCD11c	sF480
Coefficient	Daylight	1	-0.015	-.163*	0.113	0.062	-0.056	-.211**	-.161*	-0.023	.315**	-0.037	0.063	-.128*	-0.136	-.204**	-0.124	-.168*	-.164*	-.164*	-.164*	-0.092
P value			0.819	0.01	0.077	0.368	0.381	0.001	0.011	0.716	0	0.563	0.334	0.049	0.064	0.006	0.095	0.019	0.026	0.026	0.027	0.212
N		212	247	247	245	215	248	247	248	244	148	245	235	235	186	182	182	194	185	184	184	184
Coefficient	Age	0.017	1	.733**	-.280**	.273**	-0.011	.448**	.151*	.512**	0.072	0.029	.214**	.231**	-0.055	-0.136	-.163*	-.168*	-.209**	-0.117	-.154*	-.177*
P value		0.808		0	0	0	0.862	0	0.018	0	0.385	0.657	0.001	0	0.461	0.068	0.029	0.02	0.004	0.114	0.038	0.016
N		209	209	246	244	214	247	246	247	243	147	244	234	234	185	181	181	193	184	183	183	183
Coefficient	Mass	-0.08	.745**	1	-.329**	.203**	0.07	.714**	.310**	.720**	.186*	0.084	.290**	.192**	0.026	-.166*	-.207**	-.241**	-.184*	-.200**	-.193**	-.295**
P value		0.247	0		0	0.003	0.271	0	0	0	0.024	0.191	0	0.003	0.73	0.025	0.005	0.001	0.013	0.007	0.009	0
N		212	209	212	244	215	247	247	247	243	148	244	234	234	185	181	181	193	184	183	183	183
Coefficient	Mites	.144*	-.320**	-.422**	1	-.198**	0.092	-.191**	-0.044	-.151*	.166*	-.160*	-0.115	-0.076	0.064	-0.029	-0.009	-0.036	-0.102	-0.019	-0.044	-0.021
P value		0.038	0	0		0.004	0.151	0.003	0.497	0.019	0.044	0.013	0.081	0.251	0.388	0.703	0.906	0.623	0.169	0.798	0.559	0.775
N		208	206	208	208	212	245	244	245	241	147	242	232	232	184	179	179	191	182	181	181	181
Coefficient	Microbe	0.004	.300**	.376**	-.216**	1	-0.091	0.082	-0.012	.143*	0.066	.165*	.245**	.167*	-0.003	-0.032	-0.085	-0.093	-0.098	-0.12	-0.137	-0.092
P value		0.962	0	0	0.004		0.184	0.231	0.862	0.037	0.434	0.015	0	0.016	0.967	0.687	0.282	0.224	0.214	0.119	0.078	0.235
N		184	181	184	180	189	215	215	215	214	145	215	207	207	159	162	162	173	164	169	167	167
Coefficient	Worms	-.167*	.160*	.135*	-0.049	.170*	1	.142*	.138*	0.083	0.115	-0.115	-0.112	0.017	0.078	0.005	0.064	-0.026	0.013	-0.042	-0.042	-0.034
P value		0.015	0.021	0.05	0.485	0.021		0.026	0.03	0.197	0.163	0.073	0.086	0.798	0.291	0.95	0.393	0.721	0.865	0.57	0.567	0.649
N		212	209	212	208	184	212	247	248	244	148	245	235	235	186	182	182	194	185	184	184	184
Coefficient	BMI	-.205**	.466**	.704**	-.332**	.213**	.185**	1	.883**	.435**	0.091	0.006	.214**	.140*	0.048	.306**	.267**	.179*	.187*	0.115	.188*	0.073
P value		0.003	0	0	0	0.004	0.007		0	0	0.274	0.931	0.001	0.032	0.517	0	0	0.013	0.011	0.122	0.011	0.323
N		212	209	212	208	184	212	212	247	243	148	244	234	234	185	181	181	193	184	183	183	183
Coefficient	SMI	-.228**	0.072	.217**	-.145*	0.025	.168*	.825**	1	.133*	0.023	-0.064	0.097	0.053	0.025	.497**	.474**	.398**	.357**	.291**	.374**	.297**
P value		0.001	0.302	0.002	0.038	0.736	0.014	0		0.038	0.781	0.317	0.14	0.42	0.734	0	0	0	0	0	0	0
N		211	208	211	207	183	211	211	211	244	148	245	235	235	186	182	182	194	185	184	184	184
Coefficient	Ab Fat	0.003	.527**	.665**	-.218**	.256**	.163*	.530**	.250**	1	.535**	0.125	.136*	0	0.03	-.167*	-.179*	-.201**	-.156*	-.184*	-.153*	-.217**
P value		0.965	0	0	0.003	0.001	0.025	0	0.001		0	0.052	0.038	0.994	0.692	0.025	0.016	0.005	0.034	0.013	0.039	0.003
N		189	186	189	185	170	189	189	188	189	147	241	232	232	182	181	181	193	184	184	184	184
Coefficient	Leptin	0.115	.191*	.238**	0.037	0.093	-0.052	.296**	.236*	.468**	1	-0.053	.173*	-0.062	-0.028	-0.113	-0.094	-0.077	0.101	-0.103	-0.103	-0.064
P value		0.216	0.041	0.009	0.697	0.326	0.573	0.001	0.01	0		0.521	0.037	0.454	0.779	0.211	0.302	0.395	0.275	0.255	0.26	0.486
N		118	115	118	114	113	118	118	117	112	118	147	146	146	101	124	124	125	118	125	122	122
Coefficient	Haemoglobin	-.173*	-0.033	0.078	0.029	0.057	-0.022	0.039	-0.037	0.122	0.043	1	0.05	0.089	0.022	-0.055	-0.087	-0.118	-0.076	-0.08	-0.032	-0.135
P value		0.012	0.641	0.259	0.683	0.439	0.746	0.57	0.598	0.094	0.647		0.446	0.176	0.769	0.46	0.243	0.101	0.306	0.283	0.667	0.068
N		210	207	210	206	183	210	210	210	188	117	210	235	235	183	181	181	193	185	183	183	183
Coefficient	IgG	0.076	.326**	.444**	-.154*	.363**	-0.014	.300**	0.063	.363**	.225*	.174*	1	.320**	0.027	-0.01	-0.045	-0.072	-0.017	-0.098	-0.068	-0.036
P value		0.278	0	0	0.029	0	0.841	0	0.367	0	0.014	0.013		0	0.723	0.892	0.547	0.325	0.815	0.191	0.365	0.634
N		206	203	206	202	183	206	206	205	186	118	205	206	235	175	178	178	189	182	180	179	179
Coefficient	IgE	-0.002	.399**	.355**	-.210**	.195**	0.011	.238**	0.058	0.035	-0.144	-0.042	.217**	1	0.013	0.083	-0.031	0.041	-0.023	0.045	0.028	-0.004
P value		0.982	0	0	0.003	0.008	0.878	0.001	0.411	0.636	0.12	0.553	0.002		0.869	0.269	0.677	0.576	0.753	0.545	0.707	0.954
N		206	203	206	202	183	206	206	205	186	118	205	206	206	175	178	178	189	182	180	179	179
Coefficient	IgA	-.219**	0.128	.183*	-0.155	.286**	0.138	0.108	-0.03	0.085	-0.03	.198*	-0.003	0.054	1	-0.013	-0.051	-0.095	0.016	-0.078	-0.048	-0.066
P value		0.008	0.129	0.028	0.066	0.001	0.1	0.198	0.725	0.342	0.81	0.017	0.974	0.524		0.882	0.565	0.257	0.858	0.361	0.581	0.445
N		144	142	144	141	123	144	144	144	126	68	144	143	143	144	132	132	144	134	138	137	137
Coefficient	sCD4	-.245**	-.312**	-.359**	0.155	-.187*	0.003	0.083	.414**	-.206*	0.005	-0.155	-.235**	-0.019	-0.055	1	.851**	.779**	.691**	.615**	.684**	.696**
P value		0.002	0	0	0.06	0.026	0.968	0.312	0	0.014	0.961	0.056	0.004	0.814	0.585		0	0	0	0	0	0
N		152	150	152	148	141	152	152	152	142	97	152	150	150	100	152	182	172	166	170	169	169
Coefficient	sCD8	-.160*	-.311**	-.364**	.170*	-0.165	0.041	0.046	.371**	-.213*	-0.002	-0.159	-.265**	-0.034	-0.084	.937**	1	.786**	.760**	.630**	.671**	.741**
P value		0.049	0	0	0.038	0.051	0.617	0.577	0	0.011	0.986	0.05	0.001	0.676	0.404	0		0	0	0	0	0
N		152	150	152	148	141	152	152	152	142	97	152	150	150	100	152	152	172	166	170	169	169
Coefficient	sCD19	-.235**	-.305**	-.371**	0.152	-.222**	0.102	0.061	.395**	-.193*	-0.086	-.208**	-.206**	-0.044	-0.135	.804**	.831**	1	.769**	.786**	.694**	.784**
P value		0.003	0	0	0.055	0.007	0.197	0.44	0	0.017	0.399	0.008	0.009	0.583	0.16	0	0		0	0	0	0
N		163	160	163	160	148	163	163	162	153	99	162	161	161	109	145	145	163	175	174	182	182
Coefficient	sNKp46	-.191*	-.324**	-.385**	0.07	-.297**	-0.017	-0.031	.296**	-.230**	-0.137	-.175*	-.334**	-0.146	-0.075	.810**	.811**	.871**	1	.702**	.645**	.763**
P value		0.021	0	0	0.404	0.001	0.84	0.712	0	0.007	0.204	0.034	0	0.08	0.461	0	0	0		0	0	0
N		147	144	147	143	132	147	147	147	135	88	147	145	145	98	133	133	138	147	165	165	165
Coefficient	sLy6G	-.195*	-.307**	-.422**	.254**	-.365**	-0.037	-0.069	.287**	-.269**	-0.023	-0.093	-.213**	-0.126	-0.156	.575**	.534**	.646**	.711**	1	.636**	.768**
P value		0.017	0	0	0.002	0	0.65	0.403	0	0.001	0.827	0.258	0.009	0.128	0.123	0	0	0	0		0	0
N		150	147	150	146	139	150	150	150	142	95	150	148	148	99	144	144	144	132	150	176	175
Coefficient	sCD11c	-0.03	-.198*	-.249**	0.076	-.275**	0.007	0.021	.250**	-0.151	0.016	-.254**	-0.131	-0.11	-0.131	.609**	.594**	.683**	.730**	.648**	1	.762**
P value		0.715	0.016	0.002	0.361	0.001	0.929	0.794	0.002	0.072	0.878	0.002	0.111	0.181	0.195	0	0	0	0	0		0
N		151	148	151	148	139	151	151	150	143	95	150	149	149	100	140	140	150	128	144	151	183
Coefficient	sF480	-.209*	-.256**	-.416**	0.096	-.286**	0.014	-0.056	.293**	-.246**	-0.104	-0.075	-.189*	-0.062	-.198*	.592**	.565**	.673**	.783**	.882**	.537**	1
P value		0.01	0.002	0	0.246	0.001	0.868	0.496	0	0.003	0.316	0.361	0.022	0.455	0.049	0	0	0	0	0	0
N		150	147	150	147	138	150	150	149	142	94	149	148	148	100	139	139	149	127	143	150	150
* Correlation is significant at the 0.05 level (2-tailed).
** Correlation is significant at the 0.01 level (2-tailed).

## Sheet: (B) Site GL
		Daylight	Age	Mass	Mites	Microbe	Worms	BMI	SMI	Ab Fat	Leptin	Haemoglobin	IgG	IgE	IgA	sCD4	sCD8	sCD19	sNKp46	sLy6G	sCD11c	sF480
Coefficient	Daylight	1	-0.53	-.650*	.618*	-0.344	0.513	-.576*	-0.398	-.601*	-0.302	0.383	-0.263	-0.29	-0.038	-0.332	-0.384	-0.271	-0.342	0.093	-0.418	-0.095
P value			0.051	0.012	0.024	0.274	0.06	0.031	0.158	0.03	0.397	0.177	0.363	0.314	0.898	0.319	0.243	0.37	0.367	0.763	0.156	0.758
N		19	14	14	13	12	14	14	14	13	10	14	14	14	14	11	11	13	9	13	13	13
Coefficient	Age	-0.114	1	.788**	-.661*	0.228	-0.259	.650*	0.38	.630*	0.252	-0.409	0.259	.715**	0.115	-0.252	-0.141	-0.276	-0.278	-.581*	-0.142	-0.4
P value		0.642		0.001	0.014	0.476	0.371	0.012	0.18	0.021	0.482	0.146	0.371	0.004	0.697	0.455	0.678	0.361	0.469	0.037	0.645	0.176
N		19	19	14	13	12	14	14	14	13	10	14	14	14	14	11	11	13	9	13	13	13
Coefficient	Mass	0.179	.646**	1	-.639*	.650*	-0.219	.901**	.623*	.810**	0.582	-0.435	0.393	0.341	0.283	-0.157	-0.151	-0.381	-0.551	-.697**	-0.159	-.558*
P value		0.463	0.003		0.019	0.022	0.451	0	0.017	0.001	0.077	0.12	0.165	0.233	0.327	0.645	0.658	0.2	0.124	0.008	0.605	0.047
N		19	19	19	13	12	14	14	14	13	10	14	14	14	14	11	11	13	9	13	13	13
Coefficient	Mites	0.405	-0.304	-.502*	1	-0.229	-0.017	-0.533	-0.323	-0.302	0.166	.583*	-0.404	-0.465	-0.148	0.287	-0.102	0.121	0.016	0.305	-0.068	0.18
P value		0.096	0.22	0.034		0.499	0.957	0.061	0.282	0.341	0.67	0.036	0.171	0.109	0.63	0.422	0.779	0.708	0.97	0.334	0.834	0.575
N		18	18	18	18	11	13	13	13	12	9	13	13	13	13	10	10	12	8	12	12	12
Coefficient	Microbe	0.156	-0.02	0.05	0.322	1	-0.031	.682*	0.549	.678*	0.513	.660*	.645*	-0.213	0.09	0.351	0.219	0.222	0.226	-0.032	0.307	-0.086
P value		0.537	0.938	0.842	0.207		0.923	0.015	0.065	0.015	0.129	0.02	0.023	0.507	0.781	0.32	0.543	0.487	0.591	0.921	0.332	0.791
N		18	18	18	17	19	12	12	12	12	10	12	12	12	12	10	10	12	8	12	12	12
Coefficient	Worms	0.278	0.115	.462*	-0.189	-0.122	1	-0.208	-0.13	-.639*	0.029	0.055	0.009	-0.135	0.276	-0.338	-0.331	-0.15	0.048	0.13	-0.303	0.02
P value		0.25	0.639	0.046	0.452	0.629		0.475	0.657	0.019	0.936	0.851	0.977	0.645	0.34	0.31	0.32	0.624	0.902	0.672	0.314	0.948
N		19	19	19	18	18	19	14	14	13	10	14	14	14	14	11	11	13	9	13	13	13
Coefficient	BMI	0.232	0.308	.700**	-0.4	0.367	0.283	1	.898**	.890**	0.31	-0.4	.558*	0.278	0.272	0.183	0.052	-0.085	-0.314	-0.433	0.104	-0.376
P value		0.339	0.2	0.001	0.1	0.134	0.241		0	0	0.383	0.157	0.038	0.337	0.347	0.59	0.88	0.783	0.411	0.139	0.736	0.205
N		19	19	19	18	18	19	19	14	13	10	14	14	14	14	11	11	13	9	13	13	13
Coefficient	SMI	0.22	0.025	0.341	-0.214	.478*	0.112	.908**	1	.706**	0.042	-0.249	.606*	0.157	0.204	0.496	0.243	0.286	0.062	0.019	0.39	-0.018
P value		0.366	0.92	0.153	0.393	0.045	0.648	0		0.007	0.908	0.39	0.022	0.592	0.483	0.121	0.471	0.343	0.874	0.95	0.188	0.953
N		19	19	19	18	18	19	19	19	13	10	14	14	14	14	11	11	13	9	13	13	13
Coefficient	Ab Fat	-0.198	.666**	.624**	-0.264	0.305	0.134	.658**	.520*	1	0.435	-0.052	0.464	0.305	-0.104	0.196	0.112	-0.041	-0.334	-0.363	0.225	-0.221
P value		0.445	0.003	0.007	0.323	0.235	0.607	0.004	0.032		0.208	0.866	0.11	0.311	0.735	0.563	0.744	0.893	0.379	0.223	0.461	0.468
N		17	17	17	16	17	17	17	17	17	10	13	13	13	13	11	11	13	9	13	13	13
Coefficient	Leptin	-0.021	-0.037	0.007	-0.078	0.342	-0.359	0.184	0.228	0.282	1	0.28	0.055	-0.182	-0.402	-0.256	-0.291	-0.308	-0.45	-0.455	-0.3	-0.369
P value		0.946	0.905	0.981	0.81	0.277	0.229	0.546	0.453	0.402		0.433	0.881	0.615	0.249	0.506	0.448	0.386	0.371	0.186	0.399	0.294
N		13	13	13	12	12	13	13	13	11	13	10	10	10	10	9	9	10	6	10	10	10
Coefficient	Haemoglobin	0.009	-0.343	-0.065	0.023	-0.122	-0.171	0.036	0.074	-0.234	-0.2	1	0.066	-0.41	-0.146	0.301	0.066	0.287	0.224	0.372	0.278	0.256
P value		0.97	0.151	0.79	0.929	0.631	0.485	0.884	0.762	0.366	0.512		0.824	0.146	0.62	0.368	0.846	0.341	0.562	0.21	0.357	0.399
N		19	19	19	18	18	19	19	19	17	13	19	14	14	14	11	11	13	9	13	13	13
Coefficient	IgG	0.418	0.212	0.359	-0.03	0.405	0.144	.631**	.628**	0.407	0.225	0.269	1	0.151	0.032	.725*	.645*	0.425	0.041	0.125	0.319	-0.032
P value		0.075	0.384	0.131	0.905	0.096	0.558	0.004	0.004	0.105	0.46	0.265		0.607	0.913	0.012	0.032	0.148	0.916	0.684	0.289	0.918
N		19	19	19	18	18	19	19	19	17	13	19	19	14	14	11	11	13	9	13	13	13
Coefficient	IgE	-0.177	0.102	0.144	-0.394	0.295	0.046	0.266	0.242	0.144	0.439	0.022	0.292	1	0.038	-0.19	-0.007	-0.04	-0.058	-0.145	0.157	0.127
P value		0.47	0.678	0.558	0.105	0.235	0.85	0.271	0.317	0.582	0.133	0.928	0.225		0.898	0.576	0.984	0.897	0.882	0.636	0.608	0.678
N		19	19	19	18	18	19	19	19	17	13	19	19	19	14	11	11	13	9	13	13	13
Coefficient	IgA	-0.247	-0.229	-0.035	-0.021	0.204	0.024	0.047	0.085	0.231	-0.388	-0.053	-0.257	-0.129	1	-0.063	0.004	-0.119	0.244	-0.199	-0.021	-0.171
P value		0.308	0.346	0.888	0.934	0.416	0.923	0.847	0.729	0.372	0.19	0.83	0.287	0.598		0.855	0.991	0.7	0.528	0.515	0.947	0.575
N		19	19	19	18	18	19	19	19	17	13	19	19	19	19	11	11	13	9	13	13	13
Coefficient	sCD4	-.478*	-0.208	-0.274	-0.181	0.154	-0.122	-0.104	0.006	-0.268	-0.184	0.199	-0.047	.594**	0.051	1	.898**	.860**	0.518	0.537	.675*	0.371
P value		0.039	0.394	0.256	0.471	0.543	0.618	0.671	0.982	0.299	0.548	0.415	0.848	0.007	0.837		0	0.001	0.233	0.089	0.023	0.261
N		19	19	19	18	18	19	19	19	17	13	19	19	19	19	19	11	11	7	11	11	11
Coefficient	sCD8	-0.37	-0.192	-0.304	-0.152	0.112	-0.082	-0.165	-0.053	-0.343	-0.16	0.045	-0.086	.587**	0.014	.961**	1	.830**	0.594	0.487	0.578	0.367
P value		0.119	0.432	0.206	0.548	0.657	0.738	0.501	0.829	0.177	0.601	0.856	0.728	0.008	0.954	0		0.002	0.159	0.129	0.063	0.266
N		19	19	19	18	18	19	19	19	17	13	19	19	19	19	19	19	11	7	11	11	11
Coefficient	sCD19	-.496*	-0.151	-0.368	-0.138	0.079	-0.141	-0.141	0.018	-0.262	-0.126	0.048	-0.08	.527*	-0.021	.953**	.943**	1	.877**	.856**	.834**	.770**
P value		0.031	0.538	0.122	0.586	0.754	0.565	0.564	0.941	0.309	0.682	0.845	0.743	0.02	0.931	0	0		0.002	0	0	0.002
N		19	19	19	18	18	19	19	19	17	13	19	19	19	19	19	19	19	9	13	13	13
Coefficient	sNKp46	-0.545	-0.324	-.620*	-0.198	-0.116	-0.184	-0.573	-0.446	-0.584	-0.346	0.028	-0.365	0.475	0.129	.944**	.952**	.962**	1	.838**	.853**	.896**
P value		0.083	0.331	0.042	0.583	0.75	0.587	0.065	0.169	0.099	0.327	0.934	0.27	0.14	0.706	0	0	0		0.005	0.003	0.001
N		11	11	11	10	10	11	11	11	9	10	11	11	11	11	11	11	11	11	9	9	9
Coefficient	sLy6G	-0.406	-0.173	-0.451	-0.029	0.181	-0.153	-0.113	0.115	-0.246	0.054	0.086	0.106	0.297	-0.197	.742**	.718**	.837**	.847**	1	.744**	.911**
P value		0.095	0.491	0.061	0.911	0.487	0.545	0.657	0.649	0.359	0.869	0.735	0.676	0.232	0.433	0	0.001	0	0.002		0.004	0
N		18	18	18	17	17	18	18	18	16	12	18	18	18	18	18	18	18	10	18	13	13
Coefficient	sCD11c	-.540*	-0.04	-0.242	-0.118	0.154	-0.278	-0.055	0.063	-0.165	-0.106	0.342	0.011	0.229	-0.187	.705**	.563*	.709**	.930**	.818**	1	.834**
P value		0.021	0.876	0.334	0.652	0.555	0.264	0.829	0.804	0.541	0.742	0.165	0.964	0.362	0.456	0.001	0.015	0.001	0	0		0
N		18	18	18	17	17	18	18	18	16	12	18	18	18	18	18	18	18	10	18	18	13
Coefficient	sF480	-.543*	-0.017	-0.335	-0.178	0.219	-0.117	-0.118	0.031	-0.146	0.05	0.022	0.043	0.426	-0.18	.783**	.740**	.846**	.931**	.948**	.847**	1
P value		0.02	0.948	0.174	0.494	0.398	0.643	0.64	0.901	0.588	0.877	0.93	0.865	0.078	0.475	0	0	0	0	0	0
N		18	18	18	17	17	18	18	18	16	12	18	18	18	18	18	18	18	10	18	18	18
* Correlation is significant at the 0.05 level (2-tailed).
** Correlation is significant at the 0.01 level (2-tailed).

## Sheet: (C) Site PH
		Daylight	Age	Mass	Mites	Microbe	Worms	BMI	SMI	Ab Fat	Leptin	Haemoglobin	IgG	IgE	IgA	sCD4	sCD8	sCD19	sNKp46	sLy6G	sCD11c	sF480
Coefficient	Daylight	1	-0.023	-0.239	-0.014	0.178	-0.137	-.433**	-.342*	0.124	.592**	-0.018	-0.029	-.468**	-0.081	-0.177	-0.067	0.075	-0.206	-0.063	-0.214	0.11
P value			0.88	0.118	0.929	0.249	0.375	0.003	0.023	0.423	0	0.909	0.85	0.001	0.619	0.267	0.678	0.643	0.214	0.696	0.178	0.494
N		22	44	44	44	44	44	44	44	44	34	44	44	44	40	41	41	41	38	41	41	41
Coefficient	Age	0.138	1	.794**	-0.236	0.161	0.074	.327*	-0.138	.710**	0.251	-0.216	0.068	0.188	-0.022	-.469**	-.350*	-.412**	-0.289	-.374*	-0.301	-0.251
P value		0.539		0	0.123	0.298	0.631	0.03	0.373	0	0.152	0.16	0.66	0.221	0.895	0.002	0.025	0.008	0.079	0.016	0.056	0.114
N		22	22	44	44	44	44	44	44	44	34	44	44	44	40	41	41	41	38	41	41	41
Coefficient	Mass	-0.19	.729**	1	-.349*	0.048	0.24	.594**	0.033	.810**	.341*	-0.194	0.005	0.225	0.049	-.393*	-.346*	-.399**	-0.141	-.334*	-.312*	-.321*
P value		0.398	0		0.02	0.756	0.117	0	0.83	0	0.048	0.207	0.974	0.142	0.765	0.011	0.027	0.01	0.399	0.033	0.047	0.04
N		22	22	22	44	44	44	44	44	44	34	44	44	44	40	41	41	41	38	41	41	41
Coefficient	Mites	0.009	-0.265	-0.252	1	-0.086	-0.087	-0.294	-0.109	-0.244	-0.021	-.365*	-0.033	-0.112	-0.066	0.193	0.179	0.15	-0.093	-0.013	0.018	-0.118
P value		0.969	0.245	0.27		0.581	0.575	0.053	0.481	0.111	0.908	0.015	0.83	0.47	0.684	0.227	0.262	0.349	0.579	0.936	0.912	0.464
N		21	21	21	21	44	44	44	44	44	34	44	44	44	40	41	41	41	38	41	41	41
Coefficient	Microbe	0.33	0.048	-0.158	-0.126	1	-0.094	-0.04	-0.09	0.177	0.2	-0.087	.318*	0.269	-0.049	0.013	0.058	0.054	0.106	0.061	-.346*	0.067
P value		0.168	0.846	0.519	0.619		0.545	0.796	0.56	0.251	0.257	0.576	0.035	0.077	0.762	0.937	0.717	0.736	0.525	0.703	0.027	0.679
N		19	19	19	18	19	44	44	44	44	34	44	44	44	40	41	41	41	38	41	41	41
Coefficient	Worms	-0.195	-0.102	0.051	-0.19	0.098	1	.388**	.305*	0.184	0	-0.119	0.049	0.007	.413**	0.22	0.224	0.2	0.137	0.214	-0.23	-0.135
P value		0.385	0.65	0.822	0.408	0.691		0.009	0.044	0.233	0.998	0.44	0.75	0.963	0.008	0.167	0.16	0.21	0.414	0.179	0.149	0.399
N		22	22	22	21	19	22	44	44	44	34	44	44	44	40	41	41	41	38	41	41	41
Coefficient	BMI	-.456*	0.342	.725**	-0.273	-0.376	0.32	1	.821**	0.296	0.067	-0.147	-0.116	0.26	-0.019	0.14	0.177	0.075	0.149	0.164	-0.034	-0.037
P value		0.033	0.119	0	0.23	0.112	0.147		0	0.051	0.706	0.341	0.454	0.088	0.906	0.383	0.268	0.642	0.374	0.306	0.833	0.82
N		22	22	22	21	19	22	22	44	44	34	44	44	44	40	41	41	41	38	41	41	41
Coefficient	SMI	-.487*	-0.131	0.146	-0.182	-0.385	0.371	.783**	1	-0.194	-0.132	-0.095	-0.166	0.148	-0.105	.423**	.436**	.368*	0.276	.438**	0.185	0.205
P value		0.021	0.562	0.518	0.431	0.104	0.089	0		0.208	0.456	0.541	0.281	0.337	0.519	0.006	0.004	0.018	0.093	0.004	0.246	0.199
N		22	22	22	21	19	22	22	22	44	34	44	44	44	40	41	41	41	38	41	41	41
Coefficient	Ab Fat	0.177	.836**	.878**	-0.372	0.024	-0.042	.520*	-0.031	1	.647**	-0.115	-0.04	0.052	0.073	-.461**	-.424**	-.422**	-0.197	-.385*	-.308*	-.320*
P value		0.432	0	0	0.097	0.921	0.851	0.013	0.89		0	0.456	0.794	0.74	0.655	0.002	0.006	0.006	0.235	0.013	0.05	0.041
N		22	22	22	21	19	22	22	22	22	34	44	44	44	40	41	41	41	38	41	41	41
Coefficient	Leptin	.635*	0.532	0.319	-0.407	-0.053	-0.124	0.181	0.004	.634*	1	-0.197	-0.08	-0.177	0.033	-.364*	-.343*	-0.143	0.03	-0.233	-0.21	-0.17
P value		0.02	0.061	0.288	0.189	0.87	0.686	0.554	0.988	0.02		0.263	0.654	0.316	0.862	0.034	0.047	0.42	0.874	0.184	0.234	0.337
N		13	13	13	12	12	13	13	13	13	13	34	34	34	30	34	34	34	31	34	34	34
Coefficient	Haemoglobin	0.01	-0.26	-0.208	0.126	0.318	-0.018	-0.192	-0.074	-0.197	-.609*	1	-0.015	0.015	0.18	-0.119	-0.153	-.338*	-0.248	-.347*	0.21	-.315*
P value		0.966	0.242	0.353	0.587	0.184	0.936	0.391	0.744	0.38	0.027		0.925	0.924	0.265	0.46	0.34	0.031	0.133	0.026	0.187	0.045
N		22	22	22	21	19	22	22	22	22	13	22	44	44	40	41	41	41	38	41	41	41
Coefficient	IgG	0.392	0.31	0.239	-0.103	.489*	0.239	-0.077	-0.301	0.315	0.153	-0.021	1	0.134	0.21	-0.181	-0.123	-0.169	-0.104	-0.182	-0.196	-0.191
P value		0.071	0.161	0.284	0.656	0.033	0.284	0.733	0.173	0.154	0.619	0.926		0.386	0.194	0.257	0.443	0.291	0.535	0.253	0.22	0.232
N		22	22	22	21	19	22	22	22	22	13	22	22	44	40	41	41	41	38	41	41	41
Coefficient	IgE	-.433*	0.141	0.23	-0.32	0.238	0.35	0.181	0.037	0.075	-0.151	0.001	0.163	1	-0.182	0.185	0.084	0.107	.657**	0.176	-0.137	-0.132
P value		0.044	0.53	0.302	0.157	0.327	0.111	0.421	0.869	0.739	0.623	0.998	0.47		0.26	0.246	0.603	0.504	0	0.272	0.392	0.412
N		22	22	22	21	19	22	22	22	22	13	22	22	22	40	41	41	41	38	41	41	41
Coefficient	IgA	0.063	0.05	0.278	0.095	-0.038	.457*	0.102	-0.184	0.254	-0.089	0.117	-0.023	-0.275	1	-0.01	-0.077	-0.164	-0.269	-0.181	0.047	-0.222
P value		0.793	0.834	0.236	0.7	0.886	0.043	0.668	0.437	0.279	0.794	0.622	0.924	0.24		0.953	0.651	0.332	0.124	0.284	0.782	0.187
N		20	20	20	19	17	20	20	20	20	11	20	20	20	20	37	37	37	34	37	37	37
Coefficient	sCD4	-0.048	-.700**	-.795**	0.244	0.094	-0.158	-0.402	0.134	-.796**	-0.413	0.381	-.628**	-0.264	-0.156	1	.883**	.602**	.410*	.641**	0.184	.377*
P value		0.86	0.003	0	0.38	0.749	0.56	0.123	0.62	0	0.206	0.145	0.009	0.323	0.595		0	0	0.011	0	0.248	0.015
N		16	16	16	15	14	16	16	16	16	11	16	16	16	14	16	41	41	38	41	41	41
Coefficient	sCD8	0.072	-.670**	-.714**	0.338	0.096	-0.181	-0.391	0.066	-.719**	-0.299	0.453	-.545*	-0.187	-0.112	.948**	1	.626**	0.191	.561**	0.086	.416**
P value		0.792	0.005	0.002	0.218	0.745	0.503	0.134	0.808	0.002	0.373	0.078	0.029	0.487	0.703	0		0	0.25	0	0.594	0.007
N		16	16	16	15	14	16	16	16	16	11	16	16	16	14	16	16	41	38	41	41	41
Coefficient	sCD19	-0.185	-0.487	-.512*	0.022	0.092	.606*	0.217	.706**	-.575*	-0.162	0.086	-0.31	0.08	-0.367	0.48	0.395	1	.610**	.884**	-0.09	.488**
P value		0.492	0.055	0.042	0.938	0.754	0.013	0.42	0.002	0.02	0.633	0.75	0.243	0.768	0.197	0.06	0.13		0	0	0.578	0.001
N		16	16	16	15	14	16	16	16	16	11	16	16	16	14	16	16	16	38	41	41	41
Coefficient	sNKp46	0.012	-.587*	-.794**	-0.155	0.244	0.166	-.571*	0.002	-.698**	-0.081	-0.126	-0.522	-0.19	-0.256	.730**	.619*	.618*	1	.746**	0	0.28
P value		0.969	0.035	0.001	0.631	0.469	0.588	0.041	0.994	0.008	0.849	0.681	0.067	0.535	0.399	0.005	0.024	0.024		0	0.999	0.089
N		13	13	13	12	11	13	13	13	13	8	13	13	13	13	13	13	13	13	38	38	38
Coefficient	sLy6G	-0.099	-0.476	-.591*	-0.186	-0.095	-0.022	-0.088	0.367	-.586*	-0.052	-0.239	-.533*	-0.306	-0.407	.714**	.568*	0.511	.729**	1	-0.015	.592**
P value		0.727	0.073	0.02	0.525	0.758	0.939	0.756	0.178	0.022	0.879	0.391	0.041	0.267	0.167	0.003	0.027	0.051	0.007		0.926	0
N		15	15	15	14	13	15	15	15	15	11	15	15	15	13	15	15	15	12	15	41	41
Coefficient	sCD11c	-0.181	-0.148	0.244	0	-0.289	-0.025	0.286	0.211	-0.059	-0.161	-0.139	0.148	-0.146	0.047	0.026	0.022	0.054	-0.009	0.065	1	0.296
P value		0.52	0.599	0.38	0.999	0.338	0.93	0.302	0.45	0.834	0.636	0.621	0.599	0.603	0.879	0.927	0.937	0.85	0.977	0.818		0.061
N		15	15	15	14	13	15	15	15	15	11	15	15	15	13	15	15	15	12	15	15	41
Coefficient	sF480	-0.154	-0.439	-0.287	0.065	-0.485	0.203	0.023	0.257	-0.48	-0.07	-0.446	-0.155	-0.074	-0.093	0.145	0.088	0.407	0.438	0.406	.567*	1
P value		0.583	0.101	0.3	0.826	0.093	0.468	0.936	0.356	0.07	0.837	0.096	0.581	0.792	0.761	0.606	0.756	0.133	0.154	0.133	0.028
N		15	15	15	14	13	15	15	15	15	11	15	15	15	13	15	15	15	12	15	15	15
* Correlation is significant at the 0.05 level (2-tailed).
** Correlation is significant at the 0.01 level (2-tailed).

## Sheet: (D) Site SK
		Daylight	Age	Mass	Mites	Microbe	BMI	SMI	Ab Fat	Leptin	Haemoglobin	IgG	IgE	IgA	sCD4	sCD8	sCD19	sNKp46	sLy6G	sCD11c	sF480
Coefficient	Daylight	1	.715*	0.515	0.516	.669*	0.034	-0.205	0.256	-.948**	-0.289	-0.231	0.094	0.255	-0.346	-0.379	-0.202	-0.481	-0.025	-0.287	-0.299
P value			0.013	0.105	0.104	0.034	0.92	0.545	0.448	0	0.388	0.495	0.784	0.581	0.297	0.251	0.576	0.134	0.949	0.421	0.401
N		22	11	11	11	10	11	11	11	9	11	11	11	7	11	11	10	11	9	10	10
Coefficient	Age	.817**	1	.884**	0.273	0.534	0.549	0.243	0.5	-0.52	-0.582	0.287	0.587	0.262	0.135	0.07	0.228	-0.188	0.652	0.175	0.405
P value		0		0	0.417	0.111	0.08	0.472	0.117	0.151	0.06	0.392	0.058	0.57	0.693	0.839	0.527	0.58	0.057	0.628	0.245
N		22	22	11	11	10	11	11	11	9	11	11	11	7	11	11	10	11	9	10	10
Coefficient	Mass	.679**	.844**	1	0.153	0.46	.666*	0.312	.757**	-0.257	-0.533	.641*	.761**	0.264	0.1	0.065	0.365	-0.082	0.477	0.497	0.558
P value		0.001	0		0.654	0.181	0.025	0.35	0.007	0.504	0.091	0.034	0.007	0.568	0.771	0.85	0.299	0.811	0.194	0.144	0.094
N		22	22	22	11	10	11	11	11	9	11	11	11	7	11	11	10	11	9	10	10
Coefficient	Mites	0.286	0.244	0.186	1	0.426	-0.161	-0.275	0.031	-0.51	0.156	-0.252	0.098	ND	-0.272	-0.305	-0.224	-0.395	-0.239	-0.287	-0.131
P value		0.197	0.274	0.407		0.219	0.636	0.414	0.929	0.16	0.646	0.454	0.775	ND	0.419	0.361	0.534	0.229	0.536	0.422	0.718
N		22	22	22	22	10	11	11	11	9	11	11	11	ND	11	11	10	11	9	10	10
Coefficient	Microbe	.713**	.840**	.829**	0.274	1	-0.091	-0.331	0.256	-.822*	0.068	-0.236	0.336	-0.327	-0.275	-0.319	-0.268	-0.555	-0.326	-0.337	-0.227
P value		0	0	0	0.217		0.802	0.35	0.476	0.012	0.851	0.511	0.343	0.527	0.441	0.368	0.454	0.096	0.391	0.34	0.528
N		22	22	22	22	22	10	10	10	8	10	10	10	6	10	10	10	10	9	10	10
Coefficient	BMI	.622**	.762**	.790**	0.343	.777**	1	.914**	.736**	0.44	-0.472	.650*	0.467	0.443	.686*	.685*	.736*	.623*	0.624	.790**	.758*
P value		0.002	0	0	0.118	0		0	0.01	0.236	0.143	0.03	0.147	0.319	0.02	0.02	0.015	0.041	0.072	0.007	0.011
N		22	22	22	22	22	22	11	11	9	11	11	11	7	11	11	10	11	9	10	10
Coefficient	SMI	0.319	0.326	0.209	0.333	0.337	.757**	1	0.527	0.64	-0.323	0.443	0.17	0.43	.827**	.847**	.800**	.847**	0.627	.799**	.726*
P value		0.148	0.138	0.35	0.13	0.125	0		0.096	0.064	0.333	0.173	0.617	0.335	0.002	0.001	0.005	0.001	0.071	0.006	0.017
N		22	22	22	22	22	22	22	11	9	11	11	11	7	11	11	10	11	9	10	10
Coefficient	Ab Fat	0.095	0.262	.424*	-0.29	0.347	.424*	0.182	1	0.014	-0.092	.656*	0.426	0.135	0.308	0.358	.659*	0.22	0.055	0.583	0.345
P value		0.676	0.239	0.049	0.191	0.114	0.05	0.417		0.971	0.787	0.028	0.191	0.773	0.356	0.279	0.038	0.516	0.887	0.077	0.329
N		22	22	22	22	22	22	22	22	9	11	11	11	7	11	11	10	11	9	10	10
Coefficient	Leptin	-0.426	-.486*	-0.235	-0.175	-0.203	-0.066	0.058	0.449	1	0.03	0.507	0.027	0.278	0.562	0.61	0.489	.688*	0.505	0.57	0.619
P value		0.069	0.035	0.334	0.474	0.405	0.787	0.812	0.054		0.938	0.164	0.945	0.593	0.116	0.081	0.219	0.04	0.248	0.14	0.102
N		19	19	19	19	19	19	19	19	19	9	9	9	6	9	9	8	9	7	8	8
Coefficient	Haemoglobin	-0.295	-0.139	-0.043	-0.019	-0.214	-0.093	-0.114	0.205	0.31	1	-0.289	-0.396	-0.672	-0.03	0.019	0.108	-0.215	-.679*	-0.43	-0.471
P value		0.183	0.538	0.848	0.933	0.339	0.681	0.612	0.36	0.197		0.388	0.228	0.098	0.93	0.955	0.766	0.525	0.045	0.215	0.169
N		22	22	22	22	22	22	22	22	19	22	11	11	7	11	11	10	11	9	10	10
Coefficient	IgG	0.045	0.208	0.401	0.118	0.353	0.133	-0.256	.436*	0.048	-0.066	1	.691*	0.167	0.192	0.214	0.586	0.206	0.434	.842**	.792**
P value		0.843	0.353	0.065	0.6	0.107	0.555	0.251	0.043	0.846	0.769		0.019	0.721	0.571	0.528	0.075	0.543	0.243	0.002	0.006
N		22	22	22	22	22	22	22	22	19	22	22	11	7	11	11	10	11	9	10	10
Coefficient	IgE	.483*	.787**	.532*	0.31	.648**	.675**	.474*	0.241	-0.364	-0.227	0.167	1	0.332	0.087	-0.007	0.187	-0.052	0.492	0.589	.805**
P value		0.023	0	0.011	0.161	0.001	0.001	0.026	0.28	0.126	0.309	0.456		0.467	0.8	0.983	0.606	0.879	0.178	0.073	0.005
N		22	22	22	22	22	22	22	22	19	22	22	22	7	11	11	10	11	9	10	10
Coefficient	IgA	0.11	0.358	0.475	ND	0.339	0.213	-0.133	0.512	0.383	0.138	0.265	0.261	1	0.167	0.097	-0.069	0.591	0.424	.835*	0.687
P value		0.734	0.253	0.119	ND	0.281	0.506	0.68	0.089	0.275	0.67	0.406	0.413		0.721	0.836	0.896	0.162	0.403	0.039	0.131
N		12	12	12	ND	12	12	12	12	10	12	12	12	12	7	7	6	7	6	6	6
Coefficient	sCD4	-0.222	-0.345	-0.43	0.248	-0.246	0	0.431	0.02	.582*	0.289	-0.243	-0.217	0.061	1	.980**	.935**	.700*	.667*	0.575	.717*
P value		0.334	0.125	0.052	0.278	0.282	0.999	0.051	0.931	0.011	0.203	0.289	0.345	0.859		0	0	0.016	0.05	0.082	0.02
N		21	21	21	21	21	21	21	21	18	21	21	21	11	21	11	10	11	9	10	10
Coefficient	sCD8	-0.27	-0.379	-.447*	0.32	-0.32	0.029	.491*	-0.072	.509*	0.163	-0.309	-0.19	0.028	.946**	1	.973**	.731*	0.557	0.575	.648*
P value		0.236	0.09	0.042	0.157	0.157	0.901	0.024	0.755	0.031	0.479	0.172	0.408	0.935	0		0	0.011	0.119	0.082	0.043
N		21	21	21	21	21	21	21	21	18	21	21	21	11	21	21	10	11	9	10	10
Coefficient	sCD19	-0.302	-0.337	-0.39	0.165	-0.202	-0.016	0.324	0.119	.544*	0.275	-0.257	-0.174	0.255	.855**	.837**	1	0.549	0.432	0.527	0.52
P value		0.183	0.135	0.081	0.475	0.38	0.944	0.152	0.608	0.019	0.227	0.26	0.45	0.448	0	0		0.1	0.246	0.118	0.123
N		21	21	21	21	21	21	21	21	18	21	21	21	11	21	21	21	10	9	10	10
Coefficient	sNKp46	-0.358	-.587**	-.758**	-0.051	-.603**	-.488*	0.01	-0.313	.566*	-0.137	-0.391	-0.413	-0.213	.678**	.677**	.576**	1	0.416	.885**	0.619
P value		0.111	0.005	0	0.827	0.004	0.025	0.967	0.167	0.014	0.553	0.08	0.063	0.53	0.001	0.001	0.006		0.266	0.001	0.056
N		21	21	21	21	21	21	21	21	18	21	21	21	11	21	21	21	21	9	10	10
Coefficient	sLy6G	-0.072	-0.291	-.471*	-0.039	-.436*	-0.209	0.238	-0.307	-0.391	-0.025	-.482*	-0.173	-0.14	.496*	.503*	0.201	.598**	1	0.437	.829**
P value		0.758	0.2	0.031	0.867	0.048	0.362	0.299	0.175	0.108	0.914	0.027	0.453	0.681	0.022	0.02	0.383	0.004		0.24	0.006
N		21	21	21	21	21	21	21	21	18	21	21	21	11	21	21	21	21	21	9	9
Coefficient	sCD11c	-0.104	-0.326	-.498*	-0.063	-.452*	-0.243	0.207	-0.299	0.304	0.027	-.497*	-0.224	-0.088	.567**	.556**	0.299	.657**	.987**	1	.770**
P value		0.655	0.149	0.022	0.788	0.04	0.288	0.368	0.188	0.22	0.907	0.022	0.33	0.797	0.007	0.009	0.187	0.001	0		0.009
N		21	21	21	21	21	21	21	21	18	21	21	21	11	21	21	21	21	21	21	10
Coefficient	sF480	-0.051	-0.31	-.475*	-0.006	-.454*	-0.213	0.243	-0.32	-0.108	-0.009	-.526*	-0.197	-0.126	.541*	.544*	0.258	.642**	.990**	.993**	1
P value		0.831	0.183	0.034	0.979	0.044	0.368	0.302	0.169	0.68	0.971	0.017	0.406	0.712	0.014	0.013	0.272	0.002	0	0
N		20	20	20	20	20	20	20	20	17	20	20	20	11	20	20	20	20	20	20	20
** Correlation is significant at the 0.01 level (2-tailed).
* Correlation is significant at the 0.05 level (2-tailed).
b Cannot be computed because at least one of the variables is constant.
