# Supplementary material for: The ecology of immune state in a wild mammal, Mus musculus domesticus
Source: PLoS Biol. 2018 Apr 13;16(4):e2003538. doi: 10.1371/journal.pbio.2003538 (PMC5919074; doi:10.1371/journal.pbio.2003538)
Supplement: S3 Data — (A) PCA analysis of cellular and humoral immune measures showing the first 3 principal components, where PC1 is the scaled number of 7 cell types (CD4+ T cells, CD8+ T cells, B cells, natural killer (NK) cells, neutrophils, dendritic cells (DCs), and macrophages, all scaled as for scaled mass index [SMI]), PC2 is the serum concentration of immunoglobulin (Ig) G and IgE, and PC3 is the faecal concentration of IgA. ID is mouse number, and site is where each mouse was caught, where 1 is BM, 2 is HW, 3 is LU, 4 is WF, 7 is GL, 8 is WT, 9 is PF, 10 is ST, 11 is JB, 12 is PH, 13 is SP, and 14 is SK, as in Fig 1. (B) The Eigenvalues and the percentage variance explained, and (C) the loadings of scaled (prefix ‘s’) number of CD19+ B cells, NKp46+ NK cells, CD8+ T cells, CD4+ T cells, F4/80+ macrophages, Ly6G+ neutrophils, CD11c+ DCs, and the concentration of IgE, IgG, and IgA. (XLSX) [file pbio.2003538.s003.xlsx]

## Sheet: (A) PCA
ID	Site	PC1	PC2	PC3
		Cells	IgG, IgE	IgA
23	4	-0.60554	2.59682	-1.24146
26	7	-0.60396	0.48766	-1.01079
27	8	-0.39163	-1.036	1.54677
28	1	-0.5225	1.48833	2.17354
30	1	-0.5091	0.59794	-0.19406
35	1	-0.72454	0.00802	-0.83895
45	4	-0.46185	-0.39077	-0.4728
47	4	-0.49762	-0.24516	-0.58255
48	2	-0.2149	-0.47869	1.43769
52	2	-0.31002	0.67843	1.0876
57	2	0.1275	-0.55959	-0.88469
59	7	-0.64639	-0.03331	-0.58315
60	7	-0.25806	-0.3491	0.12564
61	7	-0.5367	0.8088	0.20766
63	7	-0.26137	-0.5684	-0.55222
64	9	-0.41413	-0.70448	-0.44622
65	9	-0.51098	-0.72662	-1.01987
66	7	0.90262	-0.59592	-0.87383
78	10	-0.57362	-0.71901	0.00998
79	7	-0.2471	0.73896	0.56305
81	4	-0.44327	-0.54898	1.13351
83	10	-0.39686	1.58483	-0.36633
85	4	1.21603	0.2392	0.19434
97	11	-0.53356	1.84148	-0.2399
99	11	-0.51776	0.71903	1.86612
100	8	-0.50926	0.26508	-1.14319
102	8	-0.49197	0.61002	-1.2991
103	2	-0.05337	-0.52347	-0.96761
104	11	-0.29779	-0.51788	-0.32625
106	11	-0.54241	0.01055	-0.86571
107	11	-0.23458	-1.15656	0.68317
108	11	-0.589	0.81037	-0.95598
112	2	-0.49384	-1.00046	4.75122
113	11	0.09877	-1.19933	-0.90403
114	11	0.11851	-1.19272	-1.00359
115	11	-0.27213	-0.76998	-0.39918
116	2	0.13564	-1.10051	-0.65143
124	8	0.37118	-0.77211	0.15306
126	12	-0.74005	0.14531	-1.11134
129	12	0.05958	-0.80885	-0.82149
130	12	-0.38893	-0.74915	-0.29523
131	12	0.20878	-0.80211	-0.88531
132	12	-0.44989	-1.00324	-1.03575
133	12	-0.00349	-0.63239	-0.00354
134	12	0.37722	-0.77636	-0.55222
135	12	-0.37258	0.13174	-0.27228
136	12	-0.3419	-0.53456	-0.52346
137	12	-0.38167	-1.01729	-0.34242
138	12	-0.56597	-0.61327	-0.3182
140	12	-0.57388	-0.35826	0.05468
141	12	-0.69232	0.3263	-0.80637
142	12	0.67141	-0.37441	-0.31985
143	12	-0.56256	-1.07966	-0.29037
144	12	-0.56487	-0.59497	-0.25871
145	10	0.69819	-0.92883	-0.4161
147	10	-0.13149	-0.69248	-0.45466
148	10	0.27962	-0.78554	0.28916
149	1	-0.54213	-0.34237	-0.28407
150	13	-0.35216	-1.06974	-0.53867
151	10	0.04391	-0.63331	-0.25051
155	13	0.15656	-1.1493	-0.0584
156	13	-0.48289	-1.09278	-0.29442
157	13	-0.33712	-0.96242	-0.50771
162	2	0.00481	-0.65157	0.44338
163	2	-0.47529	-1.09366	0.57454
165	2	0.47707	-0.69984	2.94479
166	2	-0.08968	-0.83658	2.04955
167	2	0.27012	-0.82075	0.36744
168	2	0.04632	-1.02126	-0.44667
169	2	-0.54498	-0.65973	0.51131
170	2	2.10343	-0.90346	1.35132
171	2	0.12088	-0.90569	-0.36761
173	2	-0.5286	0.4119	1.28456
174	2	2.4147	-0.26218	0.06937
175	2	0.00647	-0.68494	-0.60778
178	2	0.07706	-0.07913	0.78091
180	2	3.0064	-0.20375	-0.4038
182	2	1.53671	-0.31799	-0.32286
183	10	-0.19438	1.5882	0.22862
184	11	0.61443	0.33338	0.36535
185	11	1.66542	-1.21593	-1.22709
186	11	-0.52093	0.07872	-0.0881
187	9	-0.08888	0.0351	-0.84439
188	9	-0.16846	-0.48605	-0.25821
189	9	0.71866	-0.38374	-0.60104
190	9	0.41911	0.43741	-0.87564
191	11	0.40726	-1.01156	0.19842
192	9	0.28236	0.45097	-0.8222
193	11	8.33211	-0.83663	-1.46599
194	12	0.08995	-0.42677	0.79779
195	11	-0.1661	0.14499	1.06885
196	11	0.31868	-1.26762	2.61203
212	7	-0.27834	0.86653	-0.07388
213	2	-0.45762	1.85548	0.44912
215	7	2.58435	0.44663	0.46188
216	7	-0.29972	-1.19679	3.76988
218	11	-0.60257	-0.29595	-0.0697
219	11	-0.16394	0.50829	0.58226
220	11	2.50594	-1.11877	-1.29885
221	11	-0.31213	-0.11595	1.01887
222	7	-0.07587	0.28118	0.15993
223	7	0.75836	0.29286	0.51463
224	7	-0.04452	-0.93888	0.51513
225	11	-0.05922	0.35925	0.03451
226	7	-0.61301	-0.43338	-0.86331
227	7	0.87489	-0.27829	0.10475
228	7	-0.1571	-1.20825	-0.79729
229	7	2.64889	1.93645	1.39443
230	12	-0.22394	-0.99731	-0.43237
232	10	2.26264	4.92016	-0.26031
233	2	0.01352	2.63631	-0.0149
234	2	0.11125	0.00238	0.59371
235	2	0.45544	0.65728	0.40847
237	2	0.11628	3.31064	2.25602
249	1	-0.48088	-0.68808	-0.01646
250	1	0.60081	-0.98743	-0.73778
252	1	0.14097	-0.44896	0.67761
253	1	-0.51107	1.35379	-0.78551
255	1	-0.11973	0.47946	0.76643
261	3	-0.71695	-0.96752	0.24589
265	3	-0.70741	0.28009	-0.98681
271	3	-0.39189	0.1466	1.54185
272	3	-0.73115	-0.34397	-0.36456
273	3	-0.74591	0.71179	-0.73534
275	2	-0.57388	-0.85527	-0.82547
283	2	0.06271	-0.87889	0.75132
284	2	-0.5741	-0.85732	1.36044
288	2	-0.59017	-0.87616	1.19041
293	1	1.16331	-0.83716	-0.24302
295	12	-0.62539	-1.12416	0.35679
296	12	-0.78536	-0.76489	-0.91402
297	12	-0.62653	-0.72156	-0.44772
298	12	-0.77803	-0.84431	-0.37295
299	12	-0.72511	0.07001	-1.20028
300	12	-0.68531	-0.92696	0.4382
301	12	-0.18407	-0.95044	-0.33507
302	12	-0.74544	-1.10398	-0.38121
304	12	-0.5673	-0.87336	-0.93764
307	2	-0.59931	1.75001	-0.0732
308	2	-0.18031	1.86606	-0.09242
310	11	0.4376	-0.32744	-0.10251
311	11	-0.61822	1.70601	-1.09342
312	11	3.72319	0.42537	2.06306
313	11	-0.53405	0.64954	-0.73005
314	2	-0.01633	1.13781	-0.16101
315	12	1.27634	-0.90332	-1.13819
316	12	0.19499	0.05625	-0.24223
317	12	-0.54871	-0.23582	0.1313
318	12	-0.09582	-0.59355	-0.93772
319	12	-0.3141	-0.22083	-0.80583
320	12	-0.60228	0.65247	-0.66544
321	12	-0.02081	-0.67682	1.24029
322	12	-0.71856	0.86848	-0.32737
326	12	-0.69812	0.01569	-0.81058
329	12	-0.55049	0.10428	0.32057
330	12	-0.56793	-0.64597	-0.24223
331	12	-0.24821	-0.41328	-0.47863
332	12	0.14976	-0.62465	-0.80652
334	12	-0.29125	-0.54279	-0.82809
336	12	0.01343	-0.69973	-0.49898
337	12	0.31226	-1.00636	-0.0404
338	12	0.05663	-1.02499	-0.4751
339	12	-0.52127	-0.69988	-0.46704
340	12	-0.4353	0.31992	-0.1475
341	2	0.93562	0.52028	-0.28115
342	2	-0.65492	-0.66262	0.01876
349	14	0.06646	0.32944	-1.07596
350	14	-0.54462	1.34476	-1.18823
351	14	0.36358	3.17942	1.40342
352	14	2.37818	-0.78211	-1.27741
353	14	-0.33011	0.67741	-0.53373
354	14	-0.55787	0.14382	-0.19078
355	14	-0.58592	0.32512	-0.5801
356	14	-0.35473	1.82001	-1.12934
358	14	-0.47553	2.24638	0.54264
361	14	-0.26773	1.94189	-0.52721
363	14	-0.50239	1.28299	0.18502
364	14	-0.30484	1.26493	-0.85154
365	14	0.08171	2.73515	0.71074
367	14	-0.00664	1.21971	1.42335
368	14	-0.20079	2.67872	-0.90523
369	14	-0.36578	0.99279	-0.46873
371	14	0.65903	2.13311	-0.14476
376	2	1.42797	1.38987	-0.56348
377	2	-0.5159	1.53549	0.28535
378	2	-0.02623	0.19807	0.2089
379	2	0.62474	0.23946	0.25556
387	2	-0.44348	0.32779	0.26784
388	2	-0.3163	-0.33651	0.67494
389	2	-0.0185	1.48299	0.3381

## Sheet: (B) Variance
Component	Initial Eigenvalues	Percent of variance explained	Cumulative percent
1	5.286	52.857	52.857
2	1.252	12.521	65.378
3	1.011	10.113	75.491
4	0.732	7.317	82.808
5	0.586	5.858	88.666
6	0.428	4.283	92.949
7	0.236	2.361	95.311
8	0.214	2.137	97.448
9	0.149	1.493	98.941
10	0.106	1.059	100

## Sheet: (C) Loadings
	Component 1	Component 2	Component 3
sCD19	0.916
sNKp46	0.895
sCD8	0.882
sCD4	0.88
sF480	0.864		-0.104
sLy6G	0.823		-0.11
sCD11c	0.784
IgE		0.811
IgG	-0.116	0.777
IgA			0.987
