# Supplementary material for: The ecology of immune state in a wild mammal, Mus musculus domesticus
Source: PLoS Biol. 2018 Apr 13;16(4):e2003538. doi: 10.1371/journal.pbio.2003538 (PMC5919074; doi:10.1371/journal.pbio.2003538)
Supplement: S4 Data — Wild mouse multilocus genotypes showing the 1,168 locus genotypes of mice, where column A is the locus name, column B is the chromosome the locus is on, and column C is the position of the locus on the chromosome. Row 1 shows the source of the mice as S1 Table, and row 2 is the individual number of the wild mouse. The number of genotyped mice at each site is: HW 167, PH 63, JB 36, BM 33, GL 30, SK 30, WF 18, LU 18, ST 15, PF 10, WT 7, and SP 6. The genotypes of control laboratory mice are in [1]. (XLSX) [file pbio.2003538.s004.xlsx]

## Sheet: Genotype
			BM	BM	BM	BM	BM	BM	BM	BM	BM	BM	BM	BM	BM	BM	BM	BM	BM	BM	BM	BM	BM	BM	BM	BM	BM	BM	BM	BM	BM	BM	BM	BM	BM	GL	GL	GL	GL	GL	GL	GL	GL	GL	GL	GL	GL	GL	GL
Name	Chromsome	Position	1	2	7	8	10	11	12	13	14	15	17	19	20	28	29	30	31	32	33	34	44	46	146	149	249	250	251	252	253	254	255	256	293	26	36	39	40	43	59	60	61	62	63	66	74	75	79
rs3683945	1	3201415	AA	AA	AA	AA	AA	AA	AA	AA	AA	AA	AA	AA	AA	AA	AA	AA	AA	AA	AA	AB	AA	AA	AA	AA	AA	AB	AA	AB	AA	AA	AA	AB	AA	AA	AA	AA	AA	AA	AA	AA	AA	AA	AA	AA	AA	AA	AA
rs6269442	1	3495168	AA	BB	AB	AB	AB	AB	BB	BB	AA	AB	AA	AB	AB	AB	AB	AB	AB	AB	AB	AB	AB	AA	BB	AA	AB	AB	AB	AB	AA	AB	AB	AB	AA	AB	BB	BB	BB	AB	AB	AB	BB	AB	AA	AB	AB	BB	AB
rs13475701	1	4538744	BB	BB	BB	BB	BB	BB	BB	BB	BB	BB	BB	BB	BB	BB	BB	BB	BB	BB	BB	BB	BB	BB	BB	BB	BB	BB	BB	BB	BB	BB	BB	BB	BB	BB	BB	BB	BB	BB	BB	BB	BB	BB	BB	BB	BB	BB	BB
rs13475706	1	5917284	AB	BB	AB	AA	AB	AB	BB	BB	AA	BB	AA	AB	BB	AB	AB	AB	AB	AB	AB	AA	AB	AA	BB	AA	AA	AA	AA	AA	AA	AB	AB	AA	AA	AA	AA	AA	AA	AA	AA	AA	AA	AB	AA	AB	AA	AA	AA
rs3684358	1	8111551	AB	BB	AB	AA	AB	AB	AB	BB	AA	BB	AA	AB	BB	AB	AB	AB	AB	AB	AB	AA	AB	AA	BB	AB	AB	AA	AB	AA	AA	AB	AB	AA	AA	BB	BB	AB	AA	BB	BB	BB	BB	AB	BB	AA	BB	AB	BB
rs3716083	1	9092463	AB	AA	AB	BB	AB	AB	AA	AA	BB	AA	BB	AB	AA	AB	AB	AB	AB	AB	AB	AB	AB	BB	AA	AA	AB	BB	AB	AB	BB	AA	AB	AB	BB	AB	BB	AB	AA	AA	AB	AB	AB	BB	AA	AB	AB	AB	AA
rs3722996	1	11348581	AB	BB	AB	AA	AB	AB	BB	BB	AA	AB	AA	AA	BB	AB	AB	AB	AB	AB	AB	AA	AA	AA	BB	AB	AB	AB	AB	AB	AA	AB	AB	AB	AA	AB	BB	BB	BB	AA	AB	AB	AB	AB	AB	AB	BB	BB	AA
rs13475729	1	12981709	AA	AA	AA	AA	AA	AA	AA	AA	AA	AA	AA	AA	AA	AA	AA	AA	AA	AA	AA	AB	AA	AA	AA	AB	AA	AB	AA	BB	AA	AA	AA	BB	AA	BB	BB	AB	AA	BB	BB	BB	BB	AB	AB	AA	AB	AB	BB
rs3671256	1	16443156	AB	AA	AA	BB	AB	AB	AA	AB	BB	AB	AB	BB	AB	AB	BB	AB	AB	AB	AB	AA	BB	BB	AB	AA	AA	AB	AB	AA	BB	AB	AB	AA	AB	AB	AA	AA	AA	AA	AA	AB	AA	AB	AB	AB	AB	AA	AA
rs13475745	1	17512198	AB	BB	BB	AA	AB	AB	BB	AB	AA	AB	AB	AA	AB	AB	AA	AB	AB	AB	AB	BB	AA	AA	AB	BB	BB	AB	AB	BB	AA	AB	AB	BB	AB	AB	AA	AB	BB	AB	AA	AB	AB	AB	AB	BB	AA	AB	AB
rs13475750	1	19680103	BB	BB	BB	BB	BB	BB	BB	BB	BB	BB	BB	BB	BB	BB	BB	BB	BB	BB	BB	BB	BB	BB	BB	BB	BB	BB	BB	BB	BB	BB	BB	BB	BB	BB	BB	BB	BB	BB	BB	BB	BB	BB	BB	BB	BB	BB	BB
rs6404446	1	20994482	AA	AA	AA	AA	AB	AB	AB	AA	BB	AB	BB	BB	AA	AB	AA	AB	AB	AB	AA	AA	BB	AB	AA	AA	BB	AB	BB	AB	AB	AA	AB	AB	AA	AA	AA	AA	AA	AA	AA	AA	AA	AA	AA	AA	AA	AA	AA
mCV23695025	1	22386585	AA	AA	AA	AA	AB	AB	AB	AA	BB	AB	BB	BB	AA	AB	AA	AB	AB	AB	AA	AA	BB	AB	AA	AA	AA	AB	AB	AB	AB	AA	AB	AB	AA	AA	AA	AA	AA	AA	AA	AA	AA	AA	AA	AA	AA	AA	AA
rs6173215	1	22977896	BB	BB	BB	AB	BB	BB	BB	BB	BB	BB	BB	BB	BB	BB	AB	BB	BB	BB	BB	BB	BB	AB	BB	BB	BB	BB	BB	BB	BB	BB	BB	BB	BB	AB	BB	BB	BB	BB	AB	BB	AB	BB	AB	BB	AB	BB	BB
mCV24784983	1	25471405	BB	BB	BB	BB	BB	BB	BB	BB	BB	BB	BB	BB	BB	BB	BB	BB	BB	BB	BB	BB	BB	BB	BB	BB	AA	BB	AB	BB	BB	BB	BB	BB	BB	BB	BB	BB	BB	BB	BB	BB	BB	BB	BB	BB	BB	BB	BB
rs6166266	1	26136349	BB	BB	BB	AB	AA	AB	BB	BB	AA	AB	AA	AA	BB	AB	AB	AA	AB	AB	BB	AB	AA	AA	BB	BB	AA	AB	AA	AB	AB	BB	AB	AB	BB	BB	AB	BB	BB	BB	BB	BB	BB	AB	BB	AB	BB	BB	BB
rs3677683	1	27510356	BB	BB	BB	AB	AB	BB	BB	BB	BB	BB	BB	BB	BB	BB	BB	BB	BB	BB	BB	AB	BB	AB	BB	AB	NN	BB	BB	AB	BB	BB	BB	AB	BB	BB	AB	BB	BB	AB	BB	AB	AB	AB	BB	AB	BB	BB	AB
rs3695988	1	29990732	AA	AA	AA	AA	AB	AB	AA	AA	BB	AB	BB	BB	AA	AB	AB	BB	AB	AB	AA	BB	BB	AB	AA	AB	BB	AB	BB	BB	AB	AB	AB	BB	AA	BB	AB	AB	BB	AB	AB	AB	BB	AB	AB	AB	AB	BB	AB
rs4137502	1	31102378	AA	AA	AA	AB	AB	AB	AA	AB	BB	AB	BB	BB	AB	AB	BB	BB	AB	AB	AB	AB	BB	AB	AB	AB	BB	BB	BB	BB	BB	BB	AB	BB	AB	BB	AB	AB	AA	AB	BB	AB	AB	AB	AB	AA	AB	AB	AB
rs3707642	1	32799125	AA	AA	AA	AB	AA	AA	AA	AB	AA	AA	AA	AA	AB	AA	AB	AA	AA	AA	AB	BB	AA	AA	AB	AB	AA	AB	AA	AB	AB	BB	AA	AB	AB	AA	AA	AB	AA	AA	AA	AA	AA	AB	AB	AB	AB	AA	AA
rs3681732	1	34414162	BB	BB	BB	BB	BB	BB	BB	BB	BB	BB	BB	BB	BB	BB	BB	BB	BB	BB	BB	AB	BB	BB	BB	BB	AA	BB	AA	BB	BB	BB	BB	BB	BB	BB	BB	BB	BB	BB	BB	BB	BB	BB	BB	BB	BB	BB	BB
rs3683997	1	36198091	AA	AA	AA	AA	AA	AA	AA	AA	AA	AA	AA	AA	AA	AA	AA	AA	AA	AA	AA	AA	AA	AA	AA	AA	AA	AA	AA	AA	AA	AA	AA	AA	AA	AA	AA	AA	AA	AA	AA	AA	AA	AA	AA	AA	AA	AA	AA
rs4222295	1	39320203	BB	BB	BB	BB	AB	AB	AB	BB	AA	AB	AA	AB	BB	AB	AB	AA	AB	AB	BB	BB	AA	AB	AB	BB	AA	AB	AA	AB	AB	AB	AB	AB	BB	BB	BB	BB	BB	BB	BB	BB	BB	BB	AB	BB	BB	BB	BB
gnf01.036.770	1	40297949	BB	BB	BB	BB	BB	BB	BB	AB	BB	BB	BB	BB	AB	BB	AB	BB	BB	BB	AB	AB	BB	BB	AB	AB	AA	BB	AA	BB	BB	AA	BB	BB	BB	AA	AA	AA	AA	AA	AA	AA	AA	AA	AA	AA	AA	AA	AA
rs13475827	1	41262551	AB	AA	AA	AA	AB	AB	AB	AA	BB	AB	BB	AB	AB	AB	AB	BB	AB	AB	AA	AA	BB	AB	AB	AA	AB	AB	AA	AB	AB	AA	AB	AB	AA	AA	AA	AA	AA	AA	AA	AA	AA	AA	AA	AA	AA	AA	AA
rs13475834	1	42789902	AA	AA	AA	AA	AA	AA	AA	AB	AA	AA	AA	AA	AB	AA	AB	AA	AA	AA	AB	AB	AA	AA	AB	BB	AB	AA	BB	AA	AA	AB	AA	AA	AB	BB	AB	BB	BB	BB	BB	BB	BB	BB	BB	BB	BB	BB	BB
rs13475847	1	46277649	AA	AA	AA	AA	AA	AA	AA	AA	AA	AA	AA	AA	AA	AA	AA	AA	AA	AA	AA	AB	AA	AA	AA	AA	AB	AA	BB	AA	AA	AA	AA	AA	AA	AA	AA	AA	AA	AA	AA	AA	AA	AA	AB	AA	AA	AA	AA
CEL-1_49993068	1	49993068	AB	AA	AA	AA	AB	AB	AB	AB	BB	AB	BB	AB	BB	AB	AB	BB	AB	AB	AB	AB	AB	AB	BB	BB	BB	AB	BB	AB	BB	BB	AB	AB	AB	BB	BB	AB	BB	AB	AB	BB	BB	AB	BB	BB	AB	AB	AB
rs3724092	1	50613798	AA	AA	AA	AA	AA	AA	AA	AA	AA	AA	AA	AA	AA	AA	AA	AA	AA	AA	AA	AA	AA	AA	AA	AA	AB	AA	BB	AA	AA	AB	AA	AA	AA	BB	BB	AB	AA	BB	BB	BB	BB	BB	AB	AB	AB	AB	BB
rs13475866	1	51771264	AA	AA	AA	AA	AA	AA	AA	AB	AA	AA	AA	AA	AB	AA	AB	AA	AA	AA	AB	AB	AA	AA	AB	AB	AB	AA	BB	AB	AA	AB	AA	AB	AB	AA	AA	AA	AA	AA	AA	AA	AA	AA	AB	AA	AA	AA	AA
rs6183203	1	53853346	AA	AA	AA	AA	AA	AA	AA	AB	AA	AA	AA	AA	AB	AA	AB	AA	AA	AA	AB	AB	AA	AA	AB	AA	AB	AA	BB	AB	AA	AA	AA	AB	AB	BB	BB	BB	BB	AB	AB	BB	BB	BB	AB	BB	BB	BB	AB
rs6386920	1	54482766	BB	BB	BB	BB	BB	BB	BB	BB	BB	BB	BB	BB	BB	BB	BB	BB	BB	BB	BB	BB	BB	BB	BB	BB	AB	BB	AA	BB	BB	BB	BB	BB	BB	BB	BB	BB	BB	BB	BB	BB	BB	BB	BB	BB	BB	BB	BB
rs3723035	1	55942220	AB	AA	AA	AA	AB	AB	AB	AB	BB	AB	BB	AB	BB	AB	AB	BB	AB	AB	AB	AA	AB	AB	BB	AB	AB	AB	AA	AB	BB	BB	AB	AB	AB	AA	AA	BB	BB	AB	AB	AA	AB	AB	AB	AB	BB	BB	BB
rs13475881	1	58775689	BB	BB	BB	BB	BB	BB	BB	BB	BB	BB	BB	BB	BB	BB	BB	BB	BB	BB	BB	AA	BB	BB	BB	BB	AB	BB	AA	AB	BB	BB	BB	AB	BB	BB	BB	BB	BB	BB	BB	BB	BB	BB	AB	BB	BB	BB	BB
rs6353774	1	60126995	BB	BB	BB	BB	BB	BB	BB	BB	BB	BB	BB	BB	BB	BB	BB	BB	BB	BB	BB	BB	BB	BB	BB	BB	AB	BB	AA	BB	BB	BB	BB	BB	BB	BB	BB	AB	BB	BB	BB	BB	AB	AA	BB	AB	AB	AB	AB
rs3716105	1	61943426	AA	AA	AA	AA	AA	AA	AA	AA	AA	AA	AA	AA	AA	AA	AA	AA	AA	AA	AA	BB	AA	AA	AA	AA	AB	AA	BB	AB	AA	AA	AA	AB	AA	AA	AA	AB	AA	AA	AA	AA	AB	AB	AA	AA	AB	AB	AB
rs6322485	1	63649681	BB	BB	BB	BB	BB	BB	BB	BB	BB	BB	BB	BB	BB	BB	BB	BB	BB	BB	BB	AB	BB	BB	BB	AB	AB	BB	AA	AB	BB	BB	BB	AB	BB	BB	BB	AB	AA	BB	BB	BB	BB	BB	AB	AB	AB	AB	BB
rs6395308	1	65272783	AA	AA	AA	AA	AA	AA	AA	AA	AA	AA	AA	AA	AA	AA	AA	AA	AA	AA	AA	AA	AA	AA	AA	AB	AA	AA	AA	AA	AA	AA	AA	AA	AA	BB	BB	AB	AA	BB	BB	BB	BB	BB	AA	AB	AB	AB	BB
rs13475902	1	66810982	AB	AB	AB	AA	AB	AB	AB	AB	BB	AB	BB	AB	BB	AB	AB	AB	AB	BB	AB	AB	AB	AB	BB	BB	BB	AB	BB	AB	BB	AB	AB	AB	AB	BB	BB	AA	AA	AB	AB	BB	AB	AB	AB	AB	AA	AA	AA
rs6288543	1	68917890	BB	BB	BB	BB	BB	BB	BB	BB	BB	BB	BB	BB	BB	BB	BB	BB	BB	BB	BB	AA	BB	BB	BB	BB	BB	BB	BB	AB	BB	BB	BB	AB	BB	BB	AB	AB	BB	AB	AB	BB	AB	AA	BB	AB	AB	AB	AA
rs6312657	1	69408967	AB	AB	AB	BB	AB	AB	AB	AB	AA	AB	AA	AB	AA	AB	AB	AA	AB	AA	AB	AB	AB	AB	AA	AB	AB	AB	BB	AA	AA	AB	AB	AB	AB	AA	AB	AA	AA	AB	AB	AA	AB	BB	AA	AB	AA	AB	BB
rs6191076	1	72377589	AA	AA	AA	AA	AA	AA	AA	AA	BB	AA	AA	AA	BB	AA	AA	BB	AA	BB	AA	BB	AA	AA	BB	BB	AA	AA	AA	BB	BB	AA	AA	AA	AA	BB	BB	BB	BB	BB	BB	BB	BB	BB	BB	BB	BB	BB	BB
rs3713616	1	74900046	AB	AB	AB	AB	AB	AB	AB	AB	AA	BB	AB	AB	AA	AB	AB	AA	AB	AA	AB	BB	AB	AB	AA	AA	AB	AB	AB	AB	AA	AA	AB	AB	AB	AA	AB	BB	BB	AB	AB	AA	AB	BB	BB	BB	BB	BB	BB
rs13475931	1	76832354	AB	AB	AB	AB	AB	BB	AB	AB	BB	AA	AB	AB	AB	AB	AB	BB	AB	BB	AB	AB	AB	AB	BB	AB	BB	AB	BB	BB	BB	BB	AB	AB	AB	BB	BB	AB	AA	BB	BB	BB	AB	AB	AB	AB	AB	AA	AB
gnf01.075.385	1	78359030	AA	AA	AA	AA	AA	AA	AA	AA	AA	AA	AA	AA	AA	AA	AA	AA	AA	AA	AA	AA	AA	AA	AA	AA	AA	AA	AA	AA	AA	AA	AA	AA	AA	AA	AA	AA	AA	AA	AA	AA	AA	AA	AA	AA	AA	AA	AA
rs13475939	1	79202787	AA	AA	AA	AA	AA	AA	AA	AA	AA	AA	AA	AA	AA	AA	AA	AA	AA	AA	AA	AA	AA	AA	AA	AA	AA	AA	AA	AA	AA	AA	AA	AA	AA	AA	AA	AA	AA	AA	AA	AA	AA	AA	AA	AA	AA	AA	AA
mCV23431007	1	80839073	AA	AB	AB	AB	AB	BB	AB	AB	BB	AA	AB	AB	AA	AB	AB	BB	AB	BB	AB	AB	AB	AB	BB	BB	BB	AB	AA	AB	BB	BB	AB	AA	AB	BB	BB	BB	BB	BB	BB	BB	BB	AB	BB	AB	BB	BB	BB
rs13475946	1	81235702	BB	BB	BB	BB	BB	BB	BB	BB	BB	BB	BB	BB	BB	BB	BB	BB	BB	BB	BB	AB	BB	BB	BB	BB	BB	BB	AA	AB	BB	AB	BB	AB	BB	AA	AB	AB	AB	AB	AA	AA	AA	AB	AB	BB	AB	AA	AA
gnf01.079.218	1	82668689	AA	AA	AA	AA	AA	AA	AA	AA	AA	AA	AA	AA	AA	AA	AA	AA	AA	AA	AA	BB	AA	AA	AA	AA	AA	AA	AB	AB	AA	AA	AA	AA	AA	BB	AB	AB	AB	AB	BB	BB	BB	AB	AB	AA	AB	BB	AB
rs3723062	1	85865441	AA	AA	AA	AA	AA	AA	AA	AA	AA	AA	AA	AA	AA	AA	AA	AA	AA	AA	AA	AA	AA	AA	AA	AA	AA	AA	AA	AA	AA	AA	AA	AA	AA	AA	AA	AA	AA	AA	AA	AA	AA	AA	AA	AA	AA	AA	AA
UT_1_89.100476	1	87104170	BB	BB	AB	AB	AB	BB	BB	BB	BB	BB	AB	BB	BB	BB	BB	BB	BB	BB	AB	BB	AB	BB	BB	AB	BB	AB	AB	BB	BB	BB	AA	AA	AB	BB	AB	BB	BB	BB	BB	BB	BB	BB	BB	BB	BB	BB	BB
rs13475980	1	91575836	AA	AA	AB	AB	AB	AA	AB	AA	AA	AA	AB	AA	AA	AB	AB	AB	AA	AA	AB	AB	AA	AA	AA	AB	AA	AB	BB	AB	AB	AA	BB	BB	AB	AA	AA	AA	AA	AA	AA	AA	AA	AA	AA	AA	AA	AA	AA
rs6268443	1	93319361	BB	BB	AB	AB	AB	BB	BB	BB	BB	BB	AB	BB	BB	BB	AB	BB	BB	BB	AB	AA	BB	BB	BB	AA	AB	AA	AA	AB	BB	AB	AA	AA	AB	AA	AA	AB	AA	AA	AB	AA	AA	AB	AA	AB	AB	AA	AA
rs6157345	1	95497940	BB	BB	BB	BB	BB	BB	BB	BB	BB	BB	BB	BB	BB	BB	BB	BB	BB	BB	BB	BB	BB	BB	BB	BB	BB	BB	BB	BB	BB	BB	BB	BB	BB	BB	BB	BB	BB	BB	BB	BB	BB	BB	BB	BB	BB	BB	BB
rs3726669	1	96875139	AA	AA	AA	AA	AA	AA	AA	AA	AA	AA	AA	AA	AA	AA	AA	AA	AA	AA	AA	AA	AA	AA	AA	AA	AA	AA	AA	AA	AA	AA	AA	AA	AA	AA	AA	AB	AA	AA	AB	AA	AA	AB	AB	AB	AB	AA	AA
rs13476003	1	97677389	AA	AA	AB	AB	AB	AA	AA	AA	AA	AA	AB	AA	AA	AA	AB	AA	AA	AA	AB	BB	AA	AA	AA	BB	AB	BB	BB	AB	AA	AB	BB	BB	BB	BB	BB	BB	BB	BB	BB	BB	BB	BB	BB	BB	BB	BB	BB
rs13476012	1	99797518	AA	AA	AA	AA	AA	AA	AA	AA	AA	AA	AA	AA	AA	AA	AA	AA	AA	AA	AA	BB	AA	AA	AA	AA	AA	AA	BB	AB	AA	AB	AA	AA	AB	BB	BB	BB	BB	BB	BB	BB	BB	BB	BB	BB	BB	BB	BB
rs6368370	1	101749052	AA	AA	AA	AA	AA	AA	AA	AA	AA	AA	AA	AA	AA	AA	AA	AA	AA	AA	AA	AA	AA	AA	AA	AA	AA	AA	AA	AA	AA	AA	AA	AA	AB	AA	AA	AA	AA	AA	AA	AA	AB	AB	AA	AA	AA	AB	AA
CEL-1_103251925	1	103251925	AA	AA	AB	AB	AB	AA	AA	AA	AA	AA	AB	AA	AA	AA	AB	AA	AA	AA	AB	BB	AA	AA	AA	BB	AB	BB	BB	AB	AA	AB	BB	BB	BB	BB	BB	BB	BB	BB	BB	BB	BB	BB	BB	BB	BB	BB	BB
CEL-1_105423103	1	105423103	BB	BB	BB	BB	BB	BB	BB	BB	BB	BB	BB	BB	BB	BB	BB	BB	BB	BB	BB	AB	BB	BB	BB	BB	BB	BB	BB	BB	BB	BB	BB	BB	AB	AA	AA	AA	AA	AA	AA	AA	AA	AA	AA	AA	AA	AA	AA
rs13476036	1	106831730	AA	AA	AB	AB	AB	AA	AA	AA	AA	AA	AB	AA	AA	AA	BB	AA	AA	AA	AB	BB	AA	AA	AA	BB	AB	BB	BB	AB	AA	AB	BB	BB	BB	BB	BB	BB	BB	BB	BB	BB	BB	BB	BB	BB	BB	BB	BB
rs3685919	1	109634975	BB	BB	BB	BB	BB	BB	BB	BB	BB	BB	BB	BB	BB	BB	BB	BB	BB	BB	BB	BB	BB	BB	BB	BB	BB	BB	BB	BB	BB	AB	BB	BB	AB	AA	AB	BB	AB	AB	AB	AA	AB	BB	BB	AB	BB	AB	AB
rs13476050	1	110616212	BB	BB	BB	BB	BB	BB	BB	BB	BB	BB	BB	BB	BB	BB	BB	BB	BB	BB	BB	BB	BB	BB	BB	BB	BB	BB	BB	BB	BB	AB	BB	BB	AB	BB	BB	BB	BB	BB	BB	BB	BB	BB	BB	BB	BB	BB	BB
rs3726043	1	111780707	BB	BB	AB	AB	AB	BB	BB	BB	BB	BB	AB	BB	BB	BB	AA	BB	BB	BB	AB	AA	BB	BB	BB	AA	AB	AA	NN	BB	BB	AB	AA	AA	AB	BB	AB	AB	BB	BB	AB	BB	AB	AA	BB	AB	AB	AB	BB
rs13476061	1	113899609	AA	AA	AA	AA	AA	AA	AA	AA	AA	AA	AA	AA	AA	AA	AA	AA	AA	AA	AA	AB	AA	AA	AA	AA	AA	AA	AA	AA	AA	AA	AA	AA	AB	AA	AA	AB	AB	AB	AA	AA	AA	AA	AB	AA	AB	AA	AB
mCV24201027	1	115751113	BB	BB	BB	BB	BB	BB	BB	BB	BB	BB	BB	BB	BB	BB	BB	BB	BB	BB	BB	BB	BB	BB	BB	BB	BB	BB	BB	BB	BB	BB	BB	BB	BB	BB	BB	BB	BB	BB	BB	BB	BB	BB	BB	BB	BB	BB	BB
rs3674655	1	117379659	BB	BB	AB	AB	AB	BB	BB	BB	BB	BB	AB	BB	BB	BB	AA	BB	BB	BB	AB	AA	BB	BB	BB	AA	AB	AA	AA	AB	BB	AB	AA	AA	AB	AA	AA	AA	AA	AA	AA	AA	AA	AA	AA	AA	AA	AA	AA
rs3695581	1	118500635	BB	BB	BB	BB	BB	BB	BB	BB	BB	BB	BB	BB	BB	BB	BB	BB	BB	BB	BB	BB	BB	BB	BB	BB	BB	BB	BB	BB	BB	BB	BB	BB	BB	BB	BB	AB	AB	AB	BB	BB	BB	BB	AA	BB	AB	BB	AB
rs3678634	1	120380872	AA	AA	AB	AB	AB	AA	AA	AA	AA	AA	AB	AA	AA	AA	BB	AA	AB	AA	AB	AA	AA	AA	AA	BB	AB	BB	AA	AA	AA	AA	BB	AB	AB	AA	AA	AA	AA	AA	AA	AA	AA	AA	AA	AA	AA	AA	AA
rs3717360	1	122796548	BB	BB	BB	BB	BB	BB	BB	BB	BB	BB	BB	BB	BB	BB	BB	BB	BB	BB	BB	BB	BB	BB	BB	BB	BB	BB	BB	BB	AB	BB	BB	BB	BB	BB	BB	BB	BB	BB	BB	BB	BB	BB	BB	BB	BB	BB	BB
rs4137908	1	125475941	AA	AA	AA	AA	AA	AA	AA	AA	AA	AA	AA	AA	AA	AA	AA	AA	AA	AA	AA	AA	AA	AA	AA	AB	AA	AA	AA	AA	AA	AA	AA	AA	AB	AA	AB	AA	AA	AA	AA	AA	AB	AB	AA	AA	AA	AB	AA
rs6228473	1	126460218	BB	BB	BB	BB	BB	BB	BB	BB	BB	BB	BB	BB	BB	BB	BB	BB	BB	BB	BB	BB	BB	BB	BB	AB	BB	BB	BB	BB	BB	AB	BB	BB	BB	AA	AB	BB	AB	AB	AB	AA	AB	BB	BB	AB	BB	AB	AB
rs3699561	1	130962369	BB	BB	BB	BB	BB	BB	BB	BB	BB	BB	BB	BB	BB	BB	BB	BB	BB	BB	BB	AA	BB	BB	BB	AB	BB	BB	AB	AB	BB	BB	BB	BB	BB	AA	AA	AB	AA	AA	AB	AA	AB	BB	AB	AB	AB	AB	AA
rs3724826	1	131376437	AA	AA	AB	BB	AB	AA	AB	AA	AA	AA	AB	AA	AA	AA	BB	AA	AB	AA	BB	AB	AA	AA	AA	AB	AB	BB	BB	AB	AA	AA	AB	BB	AB	AA	AA	AA	AA	AA	AA	AA	AA	AA	AA	AA	AA	AA	AA
rs13476119	1	134099450	BB	BB	AB	AA	AB	BB	AB	BB	BB	BB	AB	BB	BB	BB	AA	BB	AB	BB	AA	AB	BB	BB	BB	AB	AB	AA	AA	AB	BB	BB	AB	AA	AA	BB	AA	AB	AB	AB	BB	AB	AB	BB	BB	BB	AB	BB	AB
rs6279930	1	137268795	AA	AA	AA	AA	AA	AA	AA	AA	AA	AA	AA	AA	AA	AA	AA	AA	AA	AA	AA	AB	AA	AA	AA	AA	AA	AA	AA	AA	AA	AB	AA	AA	AA	BB	AB	AA	AB	AB	AB	AB	BB	AA	AB	AB	AA	AB	AB
rs6382880	1	142470600	BB	BB	AB	AA	AB	BB	AB	BB	BB	BB	AB	BB	BB	BB	AA	BB	AB	BB	AA	AB	BB	BB	BB	AA	AB	AA	AB	BB	BB	BB	AB	AA	AA	BB	BB	BB	BB	BB	BB	BB	BB	BB	AB	BB	AB	BB	BB
rs3672697	1	145088382	BB	BB	BB	BB	BB	BB	BB	BB	BB	BB	BB	BB	BB	BB	BB	BB	BB	BB	BB	BB	BB	BB	BB	BB	BB	BB	BB	BB	BB	BB	BB	BB	BB	BB	BB	BB	BB	BB	BB	BB	BB	BB	BB	BB	BB	BB	BB
rs13476163	1	146776886	BB	BB	BB	BB	BB	BB	BB	BB	BB	BB	BB	BB	BB	BB	BB	BB	BB	BB	BB	BB	BB	BB	BB	BB	BB	BB	BB	BB	BB	AB	BB	BB	BB	BB	BB	AB	BB	BB	AB	BB	AB	AA	AA	AB	AB	AB	BB
rs6411476	1	148913234	AA	AA	AA	AA	AA	AA	AA	AA	AA	AA	AA	AA	AA	AA	AA	AB	AA	AA	AA	AA	AA	AA	AA	AA	AA	AA	AA	AA	AA	AB	AA	AA	AA	BB	BB	BB	BB	BB	BB	BB	BB	BB	AB	BB	AB	BB	BB
rs6393307	1	150967309	BB	BB	BB	BB	BB	BB	BB	BB	BB	BB	BB	BB	BB	AB	BB	BB	BB	BB	BB	BB	BB	BB	BB	BB	BB	BB	BB	BB	AB	BB	BB	BB	BB	BB	BB	BB	BB	BB	BB	BB	BB	BB	BB	BB	BB	BB	BB
CEL-1_152747565	1	152747565	BB	BB	BB	AA	AB	BB	AB	BB	BB	BB	AB	AB	AB	BB	AA	BB	AB	BB	AA	AA	BB	BB	BB	AA	AB	AA	AA	AB	BB	AB	AB	AA	AA	BB	AA	AB	AB	AA	AB	AB	AB	AB	BB	AB	AB	BB	AA
rs13476187	1	154187910	AA	AA	AA	AA	AA	AA	AA	AA	AA	AA	AA	AA	AA	AA	AA	AA	AA	AA	AA	AA	AA	AA	AA	AA	AA	AA	AA	AA	AA	AA	AA	AA	AA	AA	AA	AA	AA	AA	AA	AA	AA	AA	AA	AA	AA	AA	AA
UT_1_113.684537	1	156044150	AA	AA	AA	AA	AA	AA	AA	AA	AA	AA	AA	AA	AA	AA	AA	AA	AA	AA	AA	AA	AA	AA	AA	AA	AA	AA	AA	AA	AA	AA	AA	AA	AA	AA	AA	AA	AA	AA	AA	AA	AA	AA	AA	AA	AA	AA	AA
rs6387609	1	157898706	AA	AA	AA	AA	AA	AA	AA	AA	AA	AA	AA	AA	AA	AA	AA	AA	AA	AA	AA	AB	AA	AA	AA	AA	AA	AA	AB	AB	AA	AA	AA	AA	AA	AA	AB	AA	AA	AA	AA	AA	AA	AA	AA	AA	AA	AA	AA
rs13476208	1	162037129	AA	AA	AA	AA	AA	AA	AA	AA	AA	AA	AA	AA	AA	AA	AA	AA	AA	AA	AA	AA	AA	AA	AA	AA	AA	AA	AA	AA	AA	AA	AA	AA	AA	AA	AA	AA	AA	AA	AA	AA	AA	AA	AA	AA	AA	AA	AA
rs8245216	1	171312251	BB	BB	BB	BB	BB	BB	BB	BB	BB	BB	BB	BB	BB	BB	BB	BB	BB	BB	BB	BB	BB	BB	BB	BB	BB	BB	BB	BB	BB	BB	BB	BB	BB	BB	BB	BB	BB	BB	BB	BB	BB	BB	BB	BB	BB	BB	BB
rs13466711	1	172206556	BB	BB	BB	AB	BB	BB	AB	BB	BB	BB	AB	AB	AB	AB	AB	BB	AB	BB	AA	AB	BB	BB	BB	AA	BB	BB	BB	AA	AA	BB	AA	AA	AA	BB	BB	BB	BB	BB	BB	BB	BB	BB	BB	BB	BB	BB	BB
rs3700831	1	176145762	AA	AA	AA	AA	AA	AA	AA	AA	AA	AA	AA	AA	AA	AA	AA	AA	AA	AA	AA	AB	AA	AA	AA	AA	AA	AA	AB	AB	AA	AA	AA	AA	AA	AA	AA	AA	AA	AA	AA	AA	AA	AA	AA	AA	AA	AA	AA
rs13476265	1	179633768	AA	AB	AB	BB	AB	AA	BB	AA	AB	AA	BB	BB	BB	BB	BB	AB	BB	AA	BB	BB	AB	AA	AA	AB	AA	AA	AA	AB	AB	AB	BB	AB	AA	BB	AB	AB	NN	AB	BB	AB	BB	BB	BB	AB	AB	BB	AB
rs13474399	1	180675247	AB	AB	AA	AB	BB	AB	AB	AB	BB	AA	AB	AB	AB	AA	AB	AA	AA	AB	AB	AB	AB	AB	AB	AA	AB	AA	AB	AB	AB	AB	AA	AA	AB	BB	BB	AB	BB	BB	BB	BB	BB	BB	AB	AB	AB	AB	BB
rs13476272	1	181495101	BB	BB	BB	BB	BB	BB	BB	BB	BB	BB	BB	BB	BB	BB	BB	BB	BB	BB	BB	BB	BB	BB	BB	BB	BB	BB	BB	BB	BB	BB	BB	BB	BB	BB	BB	BB	BB	BB	BB	BB	BB	BB	BB	BB	BB	BB	BB
rs13476273	1	182175880	AA	AA	AA	AA	AA	AA	AA	AA	AA	AA	AA	AA	AA	AA	AA	AA	AA	AA	AA	AA	AA	AA	AA	AA	AA	AA	AA	AA	AA	AA	AA	AA	AA	BB	BB	AA	BB	BB	BB	BB	BB	BB	AA	AB	AB	AB	BB
rs6157620	1	183197685	BB	BB	BB	BB	BB	BB	BB	BB	BB	BB	BB	BB	BB	BB	BB	BB	BB	BB	BB	AB	BB	BB	BB	AB	AB	AB	AA	AB	BB	BB	BB	BB	BB	AA	AA	AA	AA	AA	AA	AA	AA	AA	AA	AB	AA	AB	AA
mCV22849619	1	186531848	BB	AB	AB	BB	BB	AB	BB	BB	BB	BB	BB	BB	AB	BB	AB	AA	BB	AB	BB	AB	BB	AB	AB	AA	AB	AB	AA	AB	BB	AB	BB	BB	BB	AA	BB	BB	BB	AB	BB	AB	AB	AB	AB	AB	BB	AB	AB
rs3667164	1	188355284	AA	AA	AA	AA	AA	AA	AA	AA	AA	AA	AA	AA	AA	AA	AA	AA	AA	AA	AA	AA	AA	AA	AA	AA	AA	AA	AA	AA	AA	AB	AA	AA	AA	BB	AA	AA	AA	AB	AA	AB	AB	AB	AB	AB	AA	AB	AB
rs13476300	1	190164592	BB	AB	AB	BB	AB	AB	BB	BB	BB	BB	BB	BB	BB	BB	AB	AA	BB	AB	BB	AB	BB	AB	AB	AA	BB	AB	AB	BB	BB	BB	BB	BB	BB	AB	BB	BB	BB	AB	AB	AB	AA	AA	AB	AA	BB	AA	AB
rs13476313	1	194054190	AB	BB	BB	BB	BB	BB	BB	BB	BB	BB	BB	BB	BB	BB	BB	BB	BB	AB	BB	BB	AB	BB	AB	BB	AA	AB	AB	AB	BB	BB	BB	AB	BB	BB	BB	BB	BB	BB	BB	BB	BB	BB	AB	AB	BB	AB	BB
mCV24145570	1	195161421	BB	BB	BB	BB	BB	BB	BB	BB	BB	BB	BB	BB	BB	BB	BB	BB	BB	BB	BB	AB	BB	BB	BB	BB	BB	BB	BB	BB	BB	BB	BB	BB	BB	BB	BB	BB	BB	BB	AA	BB	AB	AB	BB	AB	BB	AB	BB
rs3713997	2	3181746	AA	AA	AA	AA	AA	AA	AA	AA	AA	AA	AA	AA	AA	AA	AA	AA	AA	AA	AA	AB	AA	AA	AA	AB	AB	AB	AB	AA	AA	AA	AB	AA	AA	AA	AA	AA	AA	AA	AA	AA	AA	AA	AA	AA	AA	AA	AA
rs4136817	2	4258057	AA	AB	AB	AA	AA	AA	AA	AB	AA	AA	AB	AA	AA	AA	AA	AA	AA	AA	AB	AB	AA	BB	AB	AB	AB	AA	AB	AB	AA	AB	AA	AB	AA	AB	AB	AA	AA	AA	AA	AB	AB	AB	AA	AB	AA	AB	AB
rs3678168	2	5606042	AB	AB	BB	AA	AB	AB	AB	AB	AB	AB	BB	BB	AA	AA	AA	AB	BB	AB	AB	BB	AB	BB	AB	BB	BB	AB	BB	AB	AA	AB	AB	BB	AB	BB	BB	BB	BB	BB	BB	BB	BB	BB	BB	BB	BB	BB	BB
rs6359983	2	6694892	AB	AB	BB	AA	AB	AB	AB	AB	AB	AB	BB	BB	AA	AA	AA	AB	BB	AB	AB	BB	AB	BB	AB	BB	BB	AB	BB	AB	AA	AA	AB	BB	AB	BB	BB	BB	BB	BB	BB	BB	BB	BB	BB	BB	BB	BB	BB
rs6240512	2	10929543	BB	BB	BB	BB	BB	BB	BB	BB	BB	BB	BB	BB	BB	BB	BB	BB	BB	BB	BB	AA	BB	BB	BB	AB	AB	AB	AB	BB	BB	BB	AB	BB	BB	AB	AB	AB	BB	BB	BB	AB	AB	AA	BB	AB	AB	AB	AB
rs6287980	2	13669366	AB	AA	AB	AA	AB	BB	AB	AA	AB	AB	AA	BB	AA	AA	AA	AB	BB	AB	AA	AB	AB	AA	AA	AB	AA	AA	AB	AB	AA	AB	AB	AB	AB	AB	AB	BB	BB	BB	BB	AB	AB	AB	AB	AB	AB	AB	AB
CZECH-2_15618849	2	15618849	BB	BB	BB	BB	BB	BB	BB	BB	BB	BB	BB	BB	BB	BB	BB	BB	BB	BB	BB	BB	BB	BB	BB	BB	BB	BB	BB	BB	BB	BB	BB	BB	BB	BB	BB	BB	BB	BB	BB	BB	BB	BB	BB	BB	BB	BB	BB
rs13476366	2	19454722	AB	AA	AB	AA	AA	BB	AB	AA	AB	AB	AA	BB	AA	AA	AA	AB	AB	AB	AA	BB	AB	AA	AA	AB	AB	AA	AB	BB	AA	AB	BB	AB	AB	AA	AA	AA	AA	AA	AA	AA	AA	AB	AA	AA	AA	AA	AA
rs3674936	2	20427488	BB	BB	BB	BB	BB	BB	BB	BB	BB	BB	BB	BB	BB	BB	BB	BB	BB	BB	BB	BB	BB	BB	BB	BB	BB	BB	BB	BB	AB	BB	BB	BB	BB	BB	BB	BB	BB	BB	BB	BB	AB	BB	BB	BB	BB	BB	BB
rs6286688	2	24495175	BB	BB	BB	BB	BB	BB	BB	BB	BB	BB	BB	BB	BB	BB	BB	BB	BB	BB	BB	BB	BB	BB	BB	BB	BB	BB	BB	BB	BB	BB	AB	BB	BB	BB	BB	BB	BB	BB	BB	BB	BB	BB	BB	BB	BB	BB	BB
rs13476391	2	26055543	AB	AB	AA	AB	BB	AA	AA	BB	AB	AA	AA	AA	BB	AB	BB	AB	AA	AA	AB	AA	AB	AB	AB	AA	AB	AB	AB	AA	BB	AB	AB	AA	AB	AB	BB	BB	BB	AB	AB	AB	AA	AB	BB	BB	BB	BB	AB
rs3154953	2	30147850	BB	BB	BB	BB	BB	BB	BB	BB	BB	BB	BB	BB	BB	BB	BB	BB	BB	BB	BB	BB	BB	BB	BB	AB	BB	BB	BB	BB	BB	BB	BB	BB	BB	BB	AB	BB	AB	BB	BB	BB	AB	BB	BB	BB	AB	BB	AB
rs6186876	2	31660228	BB	BB	BB	BB	BB	BB	BB	BB	BB	BB	BB	BB	BB	BB	BB	BB	BB	BB	BB	AA	BB	BB	BB	BB	BB	BB	BB	BB	BB	BB	BB	BB	BB	BB	BB	BB	BB	BB	BB	BB	BB	BB	BB	BB	BB	BB	BB
CEL-2_32981944	2	32981944	BB	BB	BB	BB	BB	BB	BB	BB	BB	BB	BB	BB	BB	BB	BB	BB	AB	BB	BB	BB	BB	BB	BB	BB	BB	BB	BB	BB	BB	BB	BB	BB	BB	BB	BB	BB	BB	BB	BB	BB	BB	BB	BB	BB	BB	BB	BB
gnf02.035.469	2	33954610	BB	BB	BB	BB	BB	BB	BB	BB	BB	BB	BB	BB	BB	BB	BB	BB	BB	BB	BB	BB	BB	BB	BB	BB	BB	BB	BB	BB	BB	BB	BB	BB	BB	BB	BB	BB	BB	BB	BB	BB	BB	BB	BB	AB	BB	BB	BB
rs6260403	2	35804961	AA	AA	AA	AA	AA	AA	AA	AA	AA	AA	AA	AA	AA	AA	AA	AA	AA	AA	AA	AA	AA	AA	AA	AA	AA	AA	AA	AA	AA	AA	AA	AA	AA	AA	AA	AA	AA	AA	AA	AA	AA	AA	AA	AA	AA	AA	AA
rs13476439	2	38071109	AA	AA	AA	AA	AA	AA	AA	AA	AA	AA	AA	AA	AA	AA	AA	AA	AA	AA	AA	AA	AA	AA	AA	AA	AA	AA	AA	AA	AA	AA	AA	AA	AA	AA	AA	AA	AA	AA	AA	AA	AA	AA	AA	AB	AA	AA	AA
rs13476454	2	41244144	AA	AB	BB	AA	AA	AA	BB	AA	AA	AB	AB	AA	AA	AB	AA	AA	AB	AB	AB	BB	AB	AB	AB	BB	AB	AA	AA	AB	AA	AA	AB	AA	AA	AA	BB	AB	BB	AB	AB	AB	AB	AB	AB	BB	AB	AB	AB
rs13476467	2	44361765	BB	BB	BB	BB	BB	BB	BB	BB	BB	BB	BB	BB	BB	BB	BB	AB	BB	BB	BB	BB	BB	BB	BB	BB	BB	BB	BB	BB	BB	BB	BB	BB	BB	BB	BB	BB	BB	BB	BB	BB	BB	BB	BB	BB	BB	BB	BB
rs13476472	2	45653218	BB	BB	BB	BB	BB	BB	BB	BB	BB	BB	BB	BB	BB	BB	BB	BB	BB	BB	BB	BB	BB	BB	BB	BB	AB	BB	BB	AB	BB	BB	AB	BB	BB	AA	BB	BB	BB	AB	AB	AB	AB	BB	BB	BB	BB	BB	BB
rs6265423	2	47124603	BB	AB	AA	BB	BB	AB	AA	BB	BB	AB	AB	BB	BB	AB	BB	BB	AB	AA	AB	BB	AB	AB	AB	AA	BB	BB	BB	BB	BB	BB	BB	BB	BB	AA	BB	AB	BB	AA	AA	AB	AB	AB	AB	AB	AB	AB	BB
rs6250599	2	48633486	AA	AA	AA	AA	AA	AA	AA	AA	AA	AA	AA	AA	AA	AA	AA	AA	AA	AA	AA	AA	AA	AA	AA	AA	AA	AA	AA	AA	AA	AA	AA	AA	AA	AA	NN	AA	NN	AA	AA	AA	AB	AB	AB	BB	AB	AB	BB
CEL-2_50605053	2	50605053	AA	AA	AA	AA	AA	AA	AA	AA	AA	AA	AA	AA	AA	AA	AA	AA	AA	AA	AA	BB	AA	AA	AA	AA	AB	AA	AA	AB	AA	AA	AB	AA	AA	AA	AA	AA	AA	AA	AA	AA	AA	AA	AA	AA	AA	AA	AA
rs3725341	2	51425686	BB	AB	AA	BB	BB	AB	AB	BB	BB	AB	AB	BB	BB	AB	BB	BB	AB	AA	AB	BB	AB	AB	AB	AA	AB	AB	BB	BB	BB	AB	BB	BB	BB	AA	BB	BB	BB	BB	BB	AB	BB	BB	BB	BB	BB	BB	BB
rs13476503	2	53143600	AA	AA	AA	AA	AA	AA	AA	AA	AA	AA	AA	AA	AA	AA	AA	AA	AA	AA	AA	BB	AA	AA	AA	AA	AA	AA	AA	AA	AA	AA	AA	AA	AA	BB	AA	AA	AA	AA	AA	AB	AA	AA	AA	AA	AA	AA	AA
rs3718711	2	56489184	AA	AB	BB	AA	AA	AB	AB	AA	AA	AB	BB	AB	AA	AA	AA	AA	AB	AB	AA	BB	AA	AB	AB	BB	BB	AB	AA	AB	AA	BB	AB	AA	AA	BB	BB	AB	BB	AA	AA	BB	AB	AB	AB	AB	AB	AB	BB
rs13476530	2	59956872	BB	AA	AA	AB	AB	AA	AA	AA	AA	AB	AA	AB	BB	BB	AB	AB	AB	AA	AA	BB	AA	AA	AB	AA	AA	AB	BB	AB	AB	AB	AB	BB	AB	BB	AA	AB	AA	BB	BB	AB	AB	AB	AB	AA	AB	AB	AA
rs4223189	2	61738719	AA	BB	AB	AA	AB	AB	BB	AB	BB	AB	BB	AB	AA	AA	AB	AB	AB	BB	BB	BB	BB	AB	AA	BB	AB	AB	AA	AA	AB	BB	AA	AA	AA	BB	AB	AB	AB	AA	AA	BB	AB	AB	AB	AB	AA	AB	BB
CEL-2_63143553	2	63143553	BB	BB	BB	BB	BB	BB	BB	BB	NN	BB	AA	AB	BB	BB	BB	BB	BB	BB	NN	BB	NN	BB	BB	AA	BB	AB	AA	AB	BB	AB	BB	AB	BB	NN	BB	AB	BB	AA	AA	BB	AB	AB	AB	BB	AB	AB	BB
rs6222797	2	65057687	BB	AA	BB	AB	AB	AB	AB	AB	AA	AB	AB	AB	BB	BB	BB	AB	AB	AB	AA	BB	AA	AB	AB	AA	BB	AB	AA	AB	BB	AB	BB	AB	BB	BB	AA	AB	AA	BB	BB	AB	AB	AB	AB	AA	AB	AB	AA
rs13476553	2	66906537	AA	BB	AA	AB	AB	AB	AB	AB	BB	AB	AB	AB	AA	AA	AA	AB	AB	AB	BB	BB	BB	AB	AB	AB	AB	AB	BB	BB	AA	BB	AB	AB	AA	AA	BB	BB	BB	BB	BB	AB	BB	BB	BB	BB	BB	BB	BB
rs6381994	2	68188374	AA	AA	AA	AA	AA	AA	AA	AA	AA	AA	AA	AA	AA	AA	AA	AA	AA	AA	AA	BB	AA	AA	AA	AA	AA	AA	AA	AA	AA	AA	AA	AA	AA	AA	AA	AA	AA	AA	AA	AA	AA	AA	AA	AA	AA	AA	AA
rs4136610	2	70090167	AA	AA	AA	AA	AA	AA	AA	AA	AA	AA	AA	AA	AA	AA	AA	AA	AA	AA	AA	BB	AA	AA	AA	BB	AB	AA	AB	AB	AA	AA	BB	BB	AA	AA	BB	AB	BB	AA	AA	AB	AB	AB	AB	AB	AB	AB	BB
rs3664661	2	71492729	BB	BB	BB	BB	BB	BB	BB	BB	BB	BB	BB	BB	BB	BB	BB	BB	BB	BB	BB	BB	BB	BB	BB	BB	BB	BB	BB	BB	BB	BB	BB	BB	BB	BB	BB	BB	BB	BB	BB	BB	BB	BB	BB	BB	BB	BB	BB
rs13476580	2	74776032	BB	BB	BB	BB	BB	BB	BB	BB	BB	BB	BB	BB	BB	BB	BB	BB	BB	BB	BB	BB	BB	BB	BB	AB	BB	BB	BB	BB	BB	BB	BB	BB	BB	AA	BB	BB	BB	AB	AB	AB	AB	BB	BB	BB	BB	BB	BB
CEL-2_79237503	2	79237503	BB	BB	BB	BB	BB	BB	BB	BB	BB	BB	BB	BB	BB	BB	BB	BB	BB	BB	BB	BB	BB	BB	BB	BB	BB	BB	BB	BB	BB	BB	BB	BB	BB	BB	BB	BB	BB	BB	BB	BB	BB	BB	BB	BB	BB	BB	BB
rs3667007	2	82000176	BB	AA	BB	BB	BB	AB	AB	AB	AB	AB	BB	AB	BB	AB	BB	BB	AB	AA	AB	BB	AB	AB	AB	AB	BB	BB	BB	BB	BB	BB	BB	BB	AB	AA	AA	AA	AA	AA	AA	AA	AA	AA	AA	AA	AA	AA	AA
rs8273639	2	84666393	AA	AA	AA	AA	AA	AA	AA	AA	AA	AA	AA	AA	AA	AA	AA	AA	AA	AA	AA	AB	AA	AA	AA	AB	AB	AA	AA	AB	AA	AA	AA	AA	AA	AB	AB	AB	AB	AA	AA	BB	AB	BB	BB	BB	AA	AB	BB
rs3689658	2	85572783	BB	AA	BB	AB	AB	AB	AB	AA	AB	AB	BB	AB	AB	AB	AB	AB	AB	AA	AB	BB	AB	AB	AA	BB	AB	BB	BB	AB	BB	AB	BB	BB	AB	AB	AA	AB	AA	AB	AB	AB	AA	AB	AA	AA	AB	AB	AA
rs13476621	2	87247149	BB	BB	BB	BB	BB	BB	BB	BB	BB	BB	BB	BB	BB	BB	BB	BB	BB	BB	BB	BB	BB	BB	BB	BB	AB	BB	BB	AB	BB	BB	BB	BB	BB	AB	BB	BB	BB	BB	BB	AB	BB	BB	BB	BB	BB	BB	BB
rs6404809	2	88899373	AA	AA	AA	AA	AA	AA	AA	AA	AA	AA	AA	AA	AA	AA	AA	AA	AA	AA	AA	AA	AA	AA	AA	AB	AB	AA	AA	AB	AA	AB	AA	AA	AA	AB	AB	AA	AB	AB	AB	AA	AB	AA	AA	AA	AB	AA	AA
rs13476639	2	92720804	AA	AA	AA	AA	AA	AA	AA	AA	AA	AA	AA	AA	AA	AA	AA	AA	AA	AA	AA	AB	AA	AA	AA	AB	AB	AA	AA	AB	AA	AA	AA	AA	AA	BB	BB	AB	BB	AB	AB	BB	BB	AB	BB	BB	AB	AB	BB
rs13476649	2	95929798	BB	BB	BB	AB	AB	BB	AB	AB	BB	BB	BB	BB	AB	BB	AB	AB	BB	BB	BB	BB	BB	BB	AB	BB	BB	BB	BB	BB	BB	BB	BB	BB	BB	AB	BB	BB	BB	AB	AB	AB	AB	BB	BB	BB	BB	BB	BB
rs6316774	2	96787868	AA	AA	AA	AA	AA	AA	AA	AA	AA	AA	AA	AA	AA	AA	AA	AA	AA	AA	AA	AA	AA	AA	AA	AA	AA	AA	AA	AA	AA	AA	AA	AA	AA	AA	AA	AA	AA	AA	AA	AA	AA	AA	AA	AA	AA	AA	AA
rs6406705	2	100253963	AA	AA	AA	AA	AA	AA	AA	AA	AA	AA	AA	AA	AA	AA	AA	AA	AA	AA	AA	AA	AA	AA	AA	AB	AA	AA	AA	AA	AA	AA	AA	AA	AA	AA	AA	AA	AA	AA	AA	AA	AA	AA	AA	AA	AA	AA	AA
rs13476666	2	101217024	AA	AA	AA	AB	AB	AA	AB	AB	AA	AA	AA	AA	AB	AA	AB	AB	AA	AA	AA	AB	AA	AA	AB	AB	AB	AA	AA	AB	AA	AA	AA	AA	AA	BB	AB	AA	AB	AB	AB	AB	AB	AA	AA	AA	AB	AA	AA
rs13476689	2	107356662	BB	AA	BB	AA	AB	AB	BB	AB	AB	AB	BB	AB	AB	AB	AB	AB	AB	AA	AB	AB	AB	AB	AA	BB	AA	AB	AB	AB	BB	AB	AB	AB	AB	AB	AB	BB	AB	AB	BB	AB	AB	BB	BB	BB	AB	BB	BB
rs13476691	2	108396162	AA	AA	AA	AA	AA	AA	AA	AA	AA	AA	AA	AA	AA	AA	AA	AA	AA	AA	AA	AA	AA	AA	AA	AA	AA	AA	AA	AA	AA	AA	AA	AA	AA	AA	AA	AA	AA	AA	AA	AA	AA	AA	AA	AA	AA	AA	AA
CEL-2_111981058	2	111981058	BB	BB	BB	AB	AB	BB	AB	AB	AB	BB	BB	BB	BB	BB	AB	BB	BB	BB	BB	AB	AB	BB	BB	BB	AB	BB	AB	AB	AB	BB	BB	BB	BB	BB	BB	BB	BB	BB	BB	BB	BB	BB	BB	BB	BB	BB	BB
rs4138562	2	114161459	BB	BB	BB	BB	BB	BB	BB	BB	BB	BB	BB	BB	BB	BB	BB	BB	BB	BB	BB	BB	BB	BB	BB	BB	BB	BB	BB	BB	BB	BB	BB	BB	BB	BB	BB	BB	BB	BB	BB	BB	BB	BB	BB	BB	BB	BB	BB
rs3699172	2	115671423	BB	BB	BB	BB	BB	BB	BB	BB	BB	BB	BB	BB	BB	BB	BB	BB	BB	BB	BB	AB	BB	BB	BB	AB	BB	BB	BB	BB	BB	AB	BB	BB	BB	BB	BB	AB	BB	AA	BB	BB	AB	AB	BB	AB	AB	AB	BB
rs13476723	2	117074373	BB	BB	BB	BB	BB	BB	BB	BB	BB	BB	BB	BB	BB	BB	BB	BB	BB	BB	BB	BB	BB	BB	BB	BB	BB	BB	BB	BB	BB	BB	BB	BB	BB	BB	BB	BB	BB	AB	BB	BB	AB	BB	BB	AB	BB	BB	BB
rs3723643	2	122067606	AA	AA	AA	AA	AA	AA	AA	AA	AA	AA	AA	AA	AA	AA	AA	AA	AA	AA	AA	AA	AA	AA	AA	AA	AA	AA	AA	AA	AA	AA	AA	AA	AA	AA	AA	AA	AA	AA	AA	AA	AA	AA	AA	AA	AA	AA	AA
rs6401493	2	125046796	BB	AB	BB	AA	AA	BB	AB	AA	AA	AB	BB	AB	AB	AB	AA	AB	AB	AA	BB	AA	AB	AB	AB	AB	AA	AA	AB	AB	AB	AB	AB	AB	AA	AA	AA	AA	AA	AB	AA	AA	AA	AB	AB	AA	AA	AB	AA
gnf02.126.027	2	127549770	AA	AA	AA	AA	AA	AA	AA	AA	AA	AA	AA	AA	AA	AA	AA	AA	AA	AA	AA	AA	AA	AA	AA	AA	AB	AA	AB	AB	AA	AA	AA	AA	AA	AA	AA	AA	AA	AA	AA	AA	AA	AA	AA	AA	AA	AA	AA
rs3661596	2	129893838	AA	AB	AA	AB	AB	AA	AA	AB	AB	AB	AA	AB	AB	AA	AB	AB	AB	BB	AA	AB	AB	AB	AB	AA	AB	BB	AA	AA	AB	AB	AB	AB	BB	BB	AA	AA	AA	AA	AA	AB	AA	AA	AA	AB	AA	AA	AA
rs3665528	2	130762932	AA	AA	AA	AA	AA	AA	AA	AA	AA	AA	AA	AA	AA	AA	AA	AA	AA	AA	AA	AB	AA	AA	AA	AA	AB	AB	AB	AB	AB	AB	AA	AA	AB	BB	BB	AB	BB	AB	BB	BB	AB	BB	BB	BB	AA	BB	BB
rs4223511	2	131742558	BB	AB	BB	AA	AA	BB	AB	AA	AA	AB	BB	AB	AB	AB	AA	AB	AB	AA	BB	AB	AB	AB	AB	BB	AB	AB	BB	BB	BB	AB	AB	AB	AB	AA	BB	AB	BB	AB	BB	AB	AB	AB	BB	BB	AA	BB	BB
rs13476783	2	133610154	AA	AA	AA	AB	AB	AA	AB	AB	AB	AA	AA	AA	AA	AB	AB	AA	AA	AA	AA	AB	AA	AA	AA	AB	AB	AA	AB	AB	AA	AB	AA	AA	AA	AA	AA	AA	AA	AB	AA	AA	AA	AB	AB	AB	AB	AB	AA
CEL-2_135876979	2	135876979	BB	BB	BB	BB	BB	BB	BB	BB	BB	BB	BB	BB	BB	BB	BB	BB	BB	BB	BB	BB	BB	BB	BB	AB	AB	BB	AB	AB	BB	BB	BB	BB	BB	BB	BB	BB	AB	BB	BB	BB	BB	BB	BB	AB	AB	BB	BB
rs8246404	2	136627476	BB	BB	BB	BB	BB	BB	BB	BB	BB	BB	BB	BB	BB	BB	BB	BB	BB	BB	BB	BB	BB	BB	BB	AB	BB	BB	BB	BB	BB	AB	BB	BB	BB	BB	BB	AB	BB	AB	BB	BB	AB	BB	BB	AB	AB	BB	BB
rs13476810	2	142149749	AA	AA	AA	AA	AA	AA	AA	AA	AB	AB	AB	AB	AA	AB	AA	AA	AB	BB	AA	AB	AB	AB	AB	AB	BB	AB	AB	AB	AA	AB	AB	AB	AB	BB	AA	AB	AA	AB	AA	AB	AA	AB	AB	AB	AB	AB	AA
rs6209325	2	147807884	BB	BB	BB	BB	BB	BB	BB	BB	BB	BB	BB	BB	BB	BB	BB	BB	BB	BB	BB	BB	BB	BB	BB	BB	BB	BB	BB	BB	BB	BB	BB	BB	BB	BB	BB	BB	BB	BB	BB	BB	BB	BB	BB	BB	BB	BB	BB
gnf02.149.271	2	151100533	AA	AA	AA	AB	AB	AB	AA	AB	BB	AB	AB	AB	AA	AB	BB	AA	AB	BB	AA	BB	AB	BB	BB	AB	BB	BB	BB	BB	AB	AB	BB	AB	AB	BB	BB	BB	BB	BB	BB	BB	BB	BB	BB	BB	BB	BB	BB
rs6247960	2	152642098	AA	AA	AA	AB	AB	AB	AA	AB	BB	AA	AA	AA	AA	AA	BB	AA	AA	AA	AA	AB	AA	AB	AB	AB	AA	AB	AB	AB	AB	AB	AB	AA	AB	BB	BB	BB	BB	BB	BB	BB	BB	AB	BB	BB	BB	BB	BB
rs6376291	2	154204634	BB	BB	BB	BB	BB	BB	BB	BB	BB	BB	BB	BB	BB	BB	BB	BB	BB	BB	BB	AB	BB	BB	BB	BB	BB	BB	BB	BB	BB	AB	BB	BB	BB	BB	AA	AB	AB	BB	AB	AB	BB	AB	AB	AB	BB	AB	AB
rs3695266	2	158068522	AA	AA	AA	AB	AB	AB	AA	AB	BB	AA	AA	AA	AB	AA	AB	AA	AA	AA	AA	AA	AA	AB	BB	AB	AA	AB	AB	AB	AB	AA	AA	AA	AB	AA	AA	AA	AA	AA	AA	AA	AA	AA	AA	AA	AA	AA	AA
rs13476874	2	159733176	AA	AA	AA	AA	AA	AA	AA	AA	AA	AA	AA	AA	AA	AA	AA	AA	AA	AA	AA	AA	AA	AA	AA	AA	AA	AA	AA	AA	AA	AA	AA	AA	AA	AA	AA	AA	AA	AA	AA	AA	AA	AA	AA	AB	AA	AA	AA
rs3664408	2	161443571	BB	BB	BB	BB	BB	BB	BB	BB	BB	AB	BB	BB	BB	AB	BB	BB	AB	AA	BB	AA	AB	AB	BB	BB	AB	AB	BB	BB	BB	BB	AB	AB	BB	BB	AA	AB	AB	BB	AB	AB	BB	AB	AB	AB	BB	AB	AB
rs3671849	2	163215888	BB	BB	BB	BB	BB	BB	BB	BB	BB	BB	BB	BB	BB	BB	BB	BB	BB	BB	BB	AA	BB	BB	NN	BB	AB	BB	AA	AA	BB	BB	BB	AB	BB	BB	BB	BB	BB	BB	BB	BB	BB	BB	BB	BB	BB	BB	BB
rs13476889	2	164370875	BB	BB	AB	BB	BB	BB	BB	BB	BB	AB	AB	AB	BB	AB	BB	BB	AB	AA	BB	AA	AB	AB	BB	BB	AB	AB	BB	BB	BB	AB	AB	AB	BB	BB	AA	AB	AB	BB	AB	AB	BB	AB	AB	AB	BB	AB	AB
rs13476895	2	166374505	BB	BB	AB	BB	BB	BB	BB	BB	BB	AB	AB	AB	BB	AB	BB	BB	AB	AA	BB	BB	AB	AB	BB	BB	AA	AB	AB	AB	BB	BB	AB	AA	BB	AA	BB	BB	AB	AB	AB	AB	AA	BB	BB	BB	AB	BB	AB
CEL-2_168586738	2	168586738	BB	BB	BB	BB	BB	BB	BB	BB	BB	BB	BB	BB	BB	BB	BB	BB	BB	BB	BB	BB	BB	BB	BB	BB	AB	BB	AB	AB	BB	BB	BB	AB	BB	AB	BB	BB	AB	AB	AB	AB	AA	BB	BB	BB	AA	BB	AB
rs3726974	2	169905098	AA	AA	AA	AA	AA	AA	AA	AA	AA	AA	AA	AA	AA	AA	AA	AA	AA	AA	AA	AA	AA	AA	AA	AA	AA	AA	AA	AA	AA	AA	AA	AA	AA	AB	BB	AB	AB	AA	AB	AB	AA	AB	AB	AA	AA	AB	AB
rs13476917	2	171452147	BB	BB	BB	BB	BB	BB	BB	BB	BB	BB	BB	BB	BB	BB	BB	BB	BB	BB	BB	BB	BB	BB	NN	BB	BB	BB	BB	BB	BB	BB	BB	BB	BB	BB	BB	BB	BB	BB	BB	BB	BB	BB	BB	BB	BB	BB	BB
rs13476928	2	174162530	BB	BB	BB	BB	BB	BB	BB	BB	BB	BB	BB	BB	BB	BB	BB	BB	BB	BB	BB	AB	BB	BB	BB	BB	BB	BB	BB	BB	BB	BB	BB	BB	BB	BB	BB	BB	BB	BB	BB	BB	BB	BB	BB	BB	BB	BB	BB
rs13476932	2	174923839	AA	AA	AA	AB	AB	AA	AA	AA	AB	AA	AA	AA	AA	AA	AA	AA	AB	AB	AA	AB	AA	AA	AB	AA	AB	AA	AB	BB	AB	AB	AB	AB	AB	AA	AA	AB	AA	AB	AA	AA	AA	AB	AB	BB	AA	AB	AA
rs13476934	2	178315515	AA	AA	BB	AA	AA	AA	AA	AA	AA	AB	AB	AB	AA	AB	AA	AA	AB	AA	AA	AB	AB	BB	AA	AB	BB	AB	BB	AA	AA	AA	AB	BB	AA	AA	AA	AA	AA	AA	AA	AA	AA	AA	AA	AA	AA	AA	AA
rs6187766	2	179210967	BB	BB	AA	BB	BB	BB	BB	BB	BB	AB	BB	AB	BB	AB	BB	BB	AB	BB	BB	BB	AB	AA	BB	BB	BB	BB	BB	BB	BB	BB	AB	BB	BB	BB	BB	BB	BB	BB	BB	BB	BB	BB	BB	BB	BB	BB	BB
rs3679483	2	179814463	AA	AA	BB	AB	AB	AA	AA	AA	AA	AB	AA	AB	AA	AB	AA	AA	BB	AB	AA	AB	AB	BB	AB	AB	AB	AA	AB	AB	AB	AA	BB	AB	AB	AA	AA	AA	AA	AA	AA	AA	AA	AA	AA	AA	AA	AA	AA
rs13476950	3	3793662	AA	AA	AA	AA	AA	AA	AA	AA	AA	AA	AA	AA	AA	AA	AA	AA	AA	AA	AA	AA	AA	AA	AA	AA	AA	AA	AA	AA	AA	AA	AA	AA	AA	AA	AA	AA	AA	AA	AA	AA	AA	AA	AA	AA	AA	AA	AA
rs13476953	3	4378945	BB	BB	BB	BB	BB	BB	BB	BB	BB	BB	BB	BB	BB	BB	BB	BB	BB	BB	BB	BB	BB	BB	BB	BB	BB	BB	BB	BB	BB	BB	BB	BB	BB	BB	BB	BB	BB	BB	BB	BB	BB	BB	BB	BB	BB	BB	BB
rs13476963	3	7703356	AA	AA	AA	AA	AA	AA	AA	AA	AA	AA	AA	AA	AA	AA	AA	AA	AA	AA	AA	AA	AA	AA	AA	AA	AA	AA	AA	AB	AA	AA	AB	AA	AA	BB	BB	AB	AB	BB	BB	BB	BB	BB	AA	AB	AB	AB	BB
rs13476969	3	9744167	BB	BB	BB	BB	BB	BB	BB	BB	BB	BB	BB	BB	BB	BB	BB	BB	BB	BB	BB	BB	BB	BB	BB	BB	BB	BB	BB	BB	BB	BB	BB	BB	BB	AB	AA	BB	AB	BB	BB	AB	BB	BB	BB	BB	BB	BB	BB
rs13476973	3	11073596	BB	AB	AB	AB	BB	AB	AA	BB	BB	AB	BB	BB	BB	AA	AB	AB	AA	AA	AA	BB	AA	AA	AB	AB	BB	BB	BB	BB	BB	BB	AB	BB	AB	BB	BB	BB	BB	AB	BB	BB	AB	BB	BB	BB	BB	BB	AB
rs6248752	3	12161848	BB	BB	BB	BB	BB	BB	BB	BB	BB	BB	BB	BB	BB	BB	BB	BB	BB	BB	BB	BB	BB	BB	BB	BB	BB	BB	BB	BB	BB	BB	BB	BB	BB	BB	BB	BB	BB	BB	AB	BB	AB	AB	BB	AB	BB	AB	BB
rs3659988	3	16122429	AA	AB	AB	AB	AA	AB	BB	AA	AA	AB	AA	AA	AA	BB	AB	AB	BB	BB	BB	AA	BB	BB	AB	AB	AA	AA	AA	AB	AA	AA	AB	AA	AB	AA	AA	AA	AA	AA	AA	AA	AA	AA	AA	AA	AA	AA	AA
gnf03.015.035	3	17691447	AA	AA	AA	AA	AA	AA	AA	AA	AA	AA	AA	AA	AA	AA	AA	AA	AA	AA	AA	AA	AA	AA	AA	AA	AA	AA	AA	AA	AA	AA	AA	AA	AA	AB	AA	BB	AA	AB	AB	AB	AA	AB	AA	AA	AB	AA	AB
mCV24211562	3	18932166	AA	AA	AA	AA	AA	AA	AA	AA	AA	AA	AA	AA	AA	AA	AA	AA	AA	AA	AA	AA	AA	AA	AA	AA	AA	AA	AA	AA	AA	AB	AA	AA	AA	AA	AB	BB	AB	AA	AA	AA	AA	AA	AA	AA	AA	AA	AA
rs6235984	3	21215374	AA	AB	AB	AB	AA	AB	BB	AA	AA	AB	AA	AA	AA	BB	AB	AB	BB	BB	BB	AA	BB	BB	AB	BB	AB	BB	BB	AA	AB	AA	BB	BB	BB	AB	BB	BB	BB	AB	AB	AB	BB	AB	BB	BB	AB	BB	AB
rs3715834	3	26405124	AA	AA	AA	AA	AA	AA	AA	AA	AA	AA	AA	AA	AA	AA	AA	AA	AA	AA	AA	AA	AA	AA	AA	AA	AA	AB	AB	AA	AA	AB	AA	AB	AA	BB	AB	AA	AA	AB	AA	BB	AB	AA	AA	AA	AA	AA	AA
rs13477030	3	27365675	AA	AB	AB	AB	AA	AB	AB	AA	AA	AB	AA	AA	AA	BB	AB	AA	BB	BB	BB	AA	BB	BB	AB	AB	AA	BB	AB	AA	AB	AA	AB	AB	BB	AB	AA	BB	AB	AB	AB	AB	AA	AB	BB	AB	BB	AB	AB
rs3660588	3	30094761	AA	AA	AA	AA	AA	AA	AA	AA	AA	AA	AA	AA	AA	AA	AA	AA	AA	AA	AA	AA	AA	AA	AA	AB	AA	AA	AA	AA	AA	AA	AA	AA	AA	AA	AA	BB	AB	AB	BB	AA	AB	BB	BB	BB	BB	BB	BB
rs13477043	3	31257023	AA	AB	AB	AB	AA	AB	AB	AA	AA	AB	AA	AA	AA	BB	AB	AA	BB	BB	BB	AB	BB	BB	AB	AB	AA	BB	AB	AA	AB	AA	AB	AB	BB	AB	AA	AA	AA	AA	AB	AB	AB	BB	AA	AB	AA	AB	AB
gnf03.030.222	3	33096061	AA	AA	AA	AA	AA	AA	AA	AA	AA	AA	AA	AA	AA	AA	AA	AA	AA	AA	AA	AB	AA	AA	AA	AA	AA	AA	AA	AA	AA	AA	AA	AA	AA	AA	AA	AA	AA	AA	AA	AA	AA	AA	AA	AA	AA	AA	AA
rs4223883	3	33860283	BB	BB	BB	BB	BB	BB	BB	BB	BB	BB	BB	BB	BB	BB	BB	BB	BB	BB	BB	BB	BB	BB	BB	BB	BB	BB	BB	BB	BB	BB	BB	BB	BB	BB	BB	BB	BB	BB	BB	BB	BB	BB	BB	BB	BB	BB	BB
rs6246699	3	36110851	BB	AB	AB	AB	AB	AB	AB	BB	BB	AB	BB	BB	AB	AA	AB	AB	AA	AB	AB	BB	AA	AA	AB	AA	BB	AA	AB	BB	AB	AB	AB	AB	AA	AB	AB	AA	AB	AA	AA	AB	AA	AA	AA	AA	AA	AA	AA
rs6274061	3	38689460	AA	AA	AA	AA	AA	AA	AA	AA	AA	AA	AA	AA	AA	AA	AA	AA	AA	AA	AA	AA	AA	AA	AA	AA	AA	AA	AA	AA	AA	AA	AA	AA	AA	AA	AA	AA	AA	AA	AA	AA	AA	AA	AA	AA	AA	AA	AA
rs6324747	3	39835273	BB	BB	BB	BB	BB	BB	BB	BB	BB	BB	BB	BB	BB	BB	BB	NN	BB	BB	BB	BB	BB	BB	BB	BB	BB	BB	BB	BB	BB	BB	BB	BB	BB	AB	BB	BB	BB	AB	AA	AB	AB	AB	BB	BB	BB	AB	AA
rs3661720	3	41838640	AA	AB	AB	AA	AB	AB	AB	AA	AA	AB	AA	AA	AB	BB	AB	AB	BB	AB	AB	AB	BB	AB	AB	AB	AB	AB	AA	AB	AB	AA	BB	AB	BB	AA	AB	AA	BB	AB	AA	AA	AB	AA	BB	AB	AB	AB	AA
rs13477083	3	43361057	BB	AB	AB	BB	AB	AB	AB	BB	BB	AB	BB	BB	AB	AA	AB	AB	AA	AB	AB	BB	AA	AB	AB	AB	AB	AB	BB	AB	AB	AB	AA	AB	AA	BB	AB	AA	AA	AB	BB	BB	AB	AB	AA	AA	AA	AB	BB
CEL-3_45598106	3	45598106	BB	BB	BB	BB	BB	BB	BB	BB	BB	BB	BB	BB	BB	BB	BB	BB	BB	BB	BB	AB	BB	BB	BB	AB	BB	AB	AB	BB	BB	AB	BB	AB	BB	AA	AA	BB	AA	AA	AA	AA	AA	AA	AA	AA	AA	AA	AA
CEL-3_46558020	3	46558020	AA	AB	AB	AA	AB	AB	AB	AA	AA	AB	AA	AA	AB	BB	AB	AB	BB	AB	AB	AB	BB	AB	AB	BB	AB	BB	AB	AB	AB	AB	BB	BB	BB	AB	AB	AA	AA	AA	AA	AB	AA	AA	AA	AA	AA	AA	AA
rs13477097	3	48335184	AA	AA	AA	AA	AA	AA	AA	AA	AA	AA	AA	AA	AA	AA	AA	AA	AA	AA	AA	AA	AA	AA	AA	AA	AA	AA	AA	AA	AB	AA	AA	AA	AA	AA	AA	AA	AA	AA	AA	AA	AA	AA	AA	AA	AA	AA	AA
rs4139913	3	50623988	AA	AB	AB	AA	AB	AB	AB	AA	AA	AB	AA	AA	AB	BB	AB	AB	BB	AB	AB	AA	BB	AB	AB	AA	AB	AB	AA	AB	AA	AA	BB	AA	AB	AA	AA	AA	AA	AA	AA	AA	AA	AA	AA	AA	AA	AA	AA
rs6241331	3	52675823	AA	BB	AB	AA	AB	AB	AB	AB	AA	AB	AA	AB	AB	BB	AB	AB	BB	BB	AB	AA	BB	BB	AB	BB	AB	AB	AA	AB	AB	AB	BB	AB	BB	AA	AA	AA	AA	AA	AA	AA	AA	AA	AA	AA	AA	AA	AA
rs6335414	3	53103565	BB	BB	BB	BB	BB	BB	BB	BB	BB	BB	BB	BB	BB	BB	BB	BB	BB	BB	BB	BB	BB	BB	BB	AB	BB	BB	BB	BB	BB	BB	BB	BB	BB	AA	AA	AA	AA	AA	AA	AA	AA	AA	AA	AA	AA	AA	AA
rs4223969	3	55143939	BB	BB	BB	BB	BB	BB	BB	BB	BB	BB	BB	BB	BB	BB	BB	BB	BB	BB	BB	AB	BB	BB	BB	BB	BB	BB	BB	BB	BB	BB	BB	BB	BB	BB	BB	BB	BB	BB	AB	BB	AB	AB	BB	BB	BB	AB	AB
rs13477126	3	56753970	BB	AA	AB	AB	AB	AB	AB	AB	BB	AB	BB	AB	AB	AA	AB	AB	AA	AA	AB	BB	AA	AA	AB	AB	AB	AB	BB	AB	AB	BB	AB	AB	AA	AA	AB	AA	BB	AB	AB	AA	BB	AB	BB	AB	AB	BB	AB
rs13477138	3	60037290	AA	AA	AA	AA	AA	AA	AA	AA	AA	AA	AA	AA	AA	AA	AA	AA	AA	AA	AA	AA	AA	AA	AA	AB	AA	AA	AA	AA	AB	AA	AA	AB	AB	AA	AA	AA	AA	AA	AA	AA	AA	AA	AA	AA	AA	AA	AA
rs13477143	3	61103349	BB	AA	AB	AB	AB	AA	AB	AB	BB	AB	BB	AB	AB	AA	AB	AB	AA	AA	AB	BB	AA	AA	AB	BB	AB	AB	BB	AB	BB	BB	AB	BB	AB	BB	BB	BB	BB	BB	BB	BB	BB	BB	BB	BB	BB	BB	BB
rs13477154	3	63787516	BB	AA	AB	AB	AB	AA	AB	AB	BB	AB	BB	AB	AB	AA	AB	AB	AA	AA	AB	BB	AA	AA	AB	AB	AB	AB	BB	AB	AB	AB	AB	AB	AA	AB	AB	AA	BB	BB	BB	AB	BB	BB	BB	BB	AB	BB	BB
rs6212539	3	65222079	AA	AA	AB	AA	AB	AA	AA	AB	BB	AA	BB	AB	AA	AA	AA	AA	AA	AA	AB	AB	AA	AA	AB	AA	AA	AB	AB	AB	AB	AB	AB	AB	AB	AB	BB	BB	BB	BB	BB	AB	BB	BB	BB	BB	BB	BB	BB
rs13477178	3	70089276	BB	AA	AA	AB	AA	AA	AB	AA	AA	AB	AA	AA	AB	AA	AB	AB	AA	AA	AA	BB	AA	AA	AA	AB	AB	AA	AB	AA	AB	AB	AA	AB	AA	BB	AB	BB	AA	AA	AA	BB	AA	AA	AA	AA	AA	AA	AA
rs6198234	3	70361430	BB	AA	AB	AB	AA	AA	AB	AB	AB	AB	BB	AB	AB	AA	AB	AB	AA	AA	AB	AA	AA	AA	AB	AA	AB	AB	BB	AB	AB	AB	AB	AB	AB	AA	AB	AA	BB	BB	AB	AA	AB	AB	BB	BB	AB	AB	AB
rs6264454	3	71858927	BB	BB	BB	BB	BB	BB	BB	BB	BB	BB	BB	BB	BB	BB	BB	BB	BB	BB	BB	AA	BB	BB	BB	AA	BB	AB	AB	BB	BB	BB	BB	AB	BB	AA	AA	AA	AA	AA	AA	AA	AA	AA	AA	AA	AA	AA	AA
rs13477201	3	75852874	AA	BB	BB	AB	BB	BB	AB	BB	BB	AB	BB	BB	AB	BB	AB	AB	BB	BB	BB	BB	BB	BB	BB	AB	BB	BB	BB	BB	BB	AB	BB	BB	BB	AA	AB	BB	AA	AA	AA	AB	AA	AA	AA	AA	AB	AA	AA
rs13477210	3	77646357	BB	BB	AB	BB	BB	BB	BB	AB	AB	BB	AA	AB	BB	BB	BB	BB	BB	BB	AB	BB	BB	BB	AB	AB	AB	AB	AA	AB	AA	AB	AB	AA	BB	AB	AA	AA	AA	AA	AA	AB	AA	AA	AA	AA	AB	AA	AA
rs13477217	3	79085242	BB	AA	AB	AB	AA	AA	AB	AB	AB	AB	BB	AB	AB	AA	AB	AB	AA	AA	AB	AA	AA	AA	AB	AB	AB	AB	BB	AB	AB	AB	AB	AB	AA	AA	AA	AA	AA	AA	AA	AA	AA	AA	AA	AA	AA	AA	AA
rs13477218	3	80321582	BB	AA	AA	AB	AA	AA	AB	AA	AA	AB	AA	AA	AB	AA	AB	AB	AA	AA	AA	BB	AA	AA	AA	AB	AA	AB	AB	AA	AB	AB	AA	BB	AA	AB	AB	BB	AA	AA	AB	AB	AB	AB	AA	AA	AA	AB	AB
rs13477224	3	81758272	AB	BB	AB	BB	BB	BB	BB	AB	AB	BB	AA	AB	AB	BB	BB	BB	BB	BB	AB	BB	BB	BB	AB	BB	AB	AB	AA	AB	AB	AB	AB	AB	BB	AB	AB	AA	AB	BB	AB	AB	AB	AB	AA	AB	AB	AA	AB
rs13477233	3	83880528	AB	AA	AA	AB	AA	AA	AB	AA	AA	AB	AA	AA	AA	AA	AB	AB	AA	AA	AA	BB	AA	AA	AA	BB	AA	AB	AB	AA	AB	AA	AB	BB	AA	BB	AB	AB	AA	AB	BB	BB	AB	AB	AA	AA	AA	AB	BB
rs3719390	3	85880745	BB	BB	BB	BB	BB	BB	BB	BB	BB	BB	BB	BB	BB	BB	BB	BB	BB	BB	BB	BB	BB	BB	BB	BB	BB	BB	BB	BB	BB	AB	BB	BB	BB	BB	AA	AA	AA	AB	BB	AB	AB	AB	AA	AA	AA	AB	BB
rs6376008	3	87149248	AA	AA	AA	AA	AA	AA	AA	AA	AA	AA	AA	AA	AA	AA	AA	AA	AA	AA	AA	AA	AA	AA	AA	AA	AA	AA	AA	AA	AB	AA	AB	AB	AA	AB	AA	AA	AA	AB	BB	AA	AB	AB	AA	AA	AA	AB	BB
rs13477251	3	89418525	AA	BB	AB	AB	BB	BB	AB	AB	AB	AB	AA	AB	AA	BB	AB	AB	BB	BB	AB	BB	BB	BB	AB	AB	AB	AB	AA	AB	AB	AB	AB	AB	BB	AB	AB	BB	AB	AB	BB	AB	AB	AB	BB	AB	AB	AB	BB
rs13477261	3	92344335	BB	BB	BB	BB	BB	BB	BB	BB	BB	BB	BB	BB	BB	BB	BB	BB	BB	BB	BB	BB	BB	BB	BB	BB	BB	BB	BB	BB	BB	BB	BB	BB	BB	BB	BB	BB	BB	AB	BB	BB	AB	BB	BB	BB	BB	BB	BB
rs13477268	3	93549679	AB	AA	AA	AB	AA	AA	AB	AA	AA	AB	AA	AA	AA	AA	AB	AB	AA	AA	AA	AA	AA	AA	AA	AB	AA	AA	AA	AA	AB	AB	AB	AB	AA	AB	BB	BB	BB	BB	BB	AB	BB	BB	BB	BB	AB	BB	BB
rs13477272	3	95678878	BB	BB	BB	BB	BB	BB	BB	BB	BB	BB	BB	BB	BB	BB	BB	BB	BB	BB	BB	BB	BB	BB	BB	AB	BB	AB	AB	BB	AB	AB	AB	AA	BB	AB	BB	BB	BB	BB	BB	AB	BB	BB	BB	BB	AB	BB	BB
rs3022964	3	97282711	AB	BB	BB	AB	BB	BB	AB	BB	BB	AB	BB	BB	BB	BB	AB	AB	BB	BB	BB	BB	BB	BB	BB	BB	BB	BB	BB	BB	BB	BB	BB	BB	BB	BB	AB	AA	AB	AB	BB	AB	AB	BB	AA	AB	AB	BB	BB
rs3726226	3	98954988	BB	BB	BB	BB	BB	BB	BB	BB	BB	BB	BB	BB	BB	BB	BB	BB	BB	BB	BB	BB	BB	BB	BB	BB	BB	AB	AB	BB	BB	BB	BB	AB	BB	BB	BB	BB	BB	BB	BB	BB	BB	BB	BB	BB	BB	BB	BB
rs3162061	3	100657788	AB	AA	AB	AA	AB	AA	AA	AB	AB	AA	AB	AA	AB	AB	AA	AB	AA	AA	AB	AA	AA	AA	AB	AB	AB	AA	AB	AB	BB	AB	BB	AB	AB	BB	AA	AA	AA	BB	BB	AB	BB	AB	AA	AA	AB	AB	BB
rs4138887	3	102619416	BB	AA	AB	AB	AB	AA	AB	AB	AB	AB	AB	AA	BB	AB	AB	BB	AA	AA	AB	BB	AA	AA	AB	AB	AB	AB	BB	AB	BB	AB	BB	BB	AB	AB	AB	AB	AA	BB	AB	BB	AB	AA	AB	AA	AA	AA	AB
rs3701653	3	103564280	BB	AA	AB	AB	AB	AA	AB	AB	AB	AB	AB	AA	BB	AB	AB	BB	AA	AA	AB	NN	AA	AA	AB	BB	AB	AA	AB	AB	BB	BB	BB	AB	AB	BB	BB	BB	BB	BB	BB	BB	BB	BB	BB	BB	BB	BB	BB
rs13477309	3	105788245	AA	BB	AB	AB	AB	BB	AB	AB	AB	AB	AB	BB	AA	AB	AB	AA	BB	BB	AB	BB	BB	BB	AB	BB	AB	AB	AA	AB	AB	AB	AB	AB	AB	BB	AB	AB	BB	BB	BB	AB	BB	BB	AB	BB	BB	BB	BB
rs3702359	3	107508882	AB	BB	BB	AB	BB	BB	AB	BB	BB	AB	BB	BB	AB	BB	AB	AB	BB	BB	BB	BB	BB	BB	BB	BB	BB	AB	AB	BB	BB	AB	BB	AB	AB	AB	BB	AB	AB	AB	BB	AB	AB	BB	BB	AB	AB	BB	BB
rs13477321	3	109585764	BB	AA	AB	AB	AB	AA	AB	AB	AB	AB	AB	AA	BB	AB	AB	BB	AA	AA	AB	AA	AA	AA	AB	AB	AA	AA	AB	AA	AB	BB	AB	AA	AB	BB	BB	BB	BB	BB	BB	BB	BB	BB	BB	BB	BB	BB	BB
rs3676545	3	110649631	BB	BB	BB	BB	BB	BB	BB	BB	BB	BB	BB	BB	BB	BB	BB	BB	BB	BB	BB	AA	BB	BB	BB	AA	BB	BB	BB	BB	BB	BB	BB	BB	BB	AA	AB	BB	BB	BB	AB	AA	AB	AB	AB	BB	BB	AB	AB
rs3698700	3	112624069	AB	AA	AA	AA	AA	AA	AB	AB	AA	AB	AA	AA	AB	AA	AA	AA	AA	AA	AA	BB	AA	AA	AB	BB	AA	AB	AB	AA	AB	AA	AB	BB	AA	BB	BB	AA	AB	AB	BB	BB	AB	BB	BB	AB	AB	BB	BB
rs3710419	3	116000138	AB	AA	AB	AB	AA	AA	AA	AA	AB	AA	AB	AA	AA	AB	AB	BB	AA	AA	AB	AA	AA	AA	AA	AA	AA	AA	AB	AA	AB	AB	AB	AA	AB	AA	AA	AA	AA	AA	AA	AA	AA	AA	AA	AA	AA	AA	AA
gnf03.119.970	3	116888086	NN	BB	AB	AB	AB	BB	AB	AB	AB	AB	AB	BB	AA	BB	AB	AA	BB	BB	AB	BB	BB	BB	AB	BB	BB	AB	AA	AB	AA	AB	AB	AA	AB	BB	AB	AA	AB	AA	AB	AB	AB	AB	AA	AA	AA	BB	AB
CEL-3_120379605	3	120379605	BB	BB	BB	BB	BB	BB	BB	BB	BB	BB	BB	BB	BB	BB	BB	BB	BB	BB	BB	BB	BB	BB	BB	BB	BB	BB	BB	BB	BB	AB	BB	BB	BB	BB	BB	BB	BB	AB	BB	BB	AB	BB	BB	BB	BB	BB	BB
rs3659836	3	122002332	BB	BB	BB	BB	BB	BB	BB	BB	BB	BB	BB	BB	BB	BB	BB	BB	BB	BB	BB	BB	BB	BB	BB	BB	BB	BB	BB	BB	BB	AB	BB	BB	BB	BB	AA	BB	AB	AB	BB	AB	AB	AB	AB	AB	BB	BB	BB
rs13477379	3	123230785	AA	BB	AB	BB	BB	BB	AA	BB	AB	AB	AB	BB	AB	BB	BB	BB	BB	BB	AB	BB	BB	BB	BB	BB	BB	BB	AB	BB	BB	AB	BB	BB	AB	BB	AA	BB	AB	AA	AB	AB	AB	BB	AA	BB	AB	BB	BB
rs13477385	3	125504930	AA	AA	AA	AA	AA	AA	AA	AA	AA	AA	AA	AA	AA	AA	AA	AA	AA	AA	AA	AA	AA	AA	AA	AA	AA	AA	AB	AA	AA	AA	AA	AA	AA	AA	AA	BB	AA	AB	AB	AA	AA	AA	AB	AB	BB	AA	AB
rs3670168	3	128820535	AA	AA	AB	AA	AA	AA	AA	AA	AA	AA	AA	AA	AA	AA	AA	AA	AB	AB	AA	BB	AA	AA	AA	AB	AB	AA	AB	AB	AB	AA	AB	AB	AB	AA	AB	BB	AA	AB	AB	AA	AA	AB	AB	BB	AB	AA	AB
rs13477404	3	130952894	AA	AA	AA	AA	AA	AA	AA	AA	AA	AA	AA	AA	AA	AA	AA	AA	AA	AA	AA	AA	AA	AA	AA	AA	AA	AA	BB	AB	AA	AA	AA	AB	AA	AA	AA	BB	AA	AB	AB	AA	AA	AA	AB	AB	BB	AA	AB
rs13477408	3	132189425	BB	BB	AB	BB	BB	BB	BB	BB	BB	BB	BB	BB	BB	BB	BB	BB	AB	AB	BB	AA	BB	BB	BB	AB	AB	AB	AA	AA	AB	BB	AB	AA	AB	BB	BB	BB	BB	AB	BB	BB	AB	AB	BB	AB	BB	BB	BB
CEL-3_133070717	3	133070717	AA	AA	AA	AA	AA	AA	AA	AA	AA	AA	AA	AA	AA	AA	AA	AA	AA	AA	AA	AA	AA	AA	AA	AA	AA	AA	AB	AA	AA	AA	AA	AA	AA	AA	AB	BB	AA	AB	AA	AA	AB	AB	AA	BB	AB	AA	AB
rs13477421	3	134785250	AA	AA	AA	AA	AA	AA	AA	AA	AA	AA	AA	AA	AA	AA	AA	AA	AA	AA	AA	AA	AA	AA	AA	AA	AA	AA	AA	AA	AA	AB	AA	AA	AA	AA	AA	AA	AA	AA	AA	AA	AA	AB	AA	AB	AA	AA	AA
rs3676039	3	136766271	BB	BB	BB	BB	BB	BB	BB	BB	BB	BB	BB	BB	BB	BB	BB	BB	BB	BB	BB	BB	BB	BB	BB	BB	BB	BB	BB	BB	BB	BB	BB	BB	BB	BB	AB	BB	BB	AB	BB	BB	AB	BB	BB	BB	BB	BB	BB
rs13477439	3	138624013	AA	AA	AA	AA	AA	AA	AA	AA	AA	AA	AA	AA	AA	AA	AA	AA	AA	AA	AA	AA	AA	AA	AA	AA	AA	AA	AA	AB	AA	AB	AA	AB	AA	AB	AB	AA	BB	BB	BB	AA	BB	AB	BB	AA	AA	BB	AB
rs3090379	3	142598970	AA	AB	AA	BB	AB	AA	AA	BB	AA	AB	AB	AB	AB	AB	BB	AB	AB	AA	BB	AA	AA	AB	BB	AB	AA	AA	AA	AA	AA	BB	AA	AA	AA	AB	BB	BB	AA	AB	AA	BB	AB	AA	AA	AB	BB	AA	AB
rs6290401	3	143193940	BB	AA	AA	AA	AA	AA	BB	AA	AB	AB	AA	AA	AB	AA	AA	AA	AA	AA	AA	BB	AA	AA	AA	AB	BB	BB	BB	BB	AB	AA	BB	BB	AA	BB	BB	BB	BB	BB	BB	BB	BB	BB	BB	BB	BB	BB	BB
rs6407142	3	143619317	BB	BB	BB	BB	BB	BB	BB	BB	BB	BB	BB	BB	BB	BB	BB	BB	BB	BB	BB	BB	BB	BB	BB	BB	BB	BB	BB	AB	BB	BB	AB	AB	BB	AB	AB	BB	AA	BB	AB	BB	AB	AB	AB	BB	AB	AA	AB
rs3710548	3	146841800	BB	BB	BB	AB	BB	BB	BB	AB	BB	AB	AB	BB	BB	BB	AA	AB	AB	BB	BB	BB	BB	BB	AB	AB	BB	BB	BB	BB	BB	AB	BB	BB	AB	BB	AB	BB	BB	AB	AB	BB	BB	AB	AB	AB	AB	BB	BB
rs3657112	3	148942421	AB	BB	BB	BB	BB	BB	AB	BB	AB	BB	BB	BB	AB	BB	BB	BB	BB	BB	BB	AA	BB	BB	BB	AB	AA	AA	AA	AA	AB	BB	AA	AA	BB	AB	AB	BB	BB	AB	AB	AA	AB	AB	AB	AB	AB	BB	BB
rs13477487	3	150745214	BB	BB	BB	AB	BB	BB	BB	AB	BB	BB	BB	AB	BB	AB	BB	BB	AB	BB	AA	BB	BB	AB	AB	BB	AB	AB	AB	AB	BB	AB	AB	AB	BB	AA	AB	BB	AB	AA	AA	AA	AB	AA	AA	AA	BB	AA	AB
rs13477494	3	152154652	AA	AA	AA	AA	AA	AA	AA	AA	AA	AA	AA	AA	AA	AA	AA	AA	AA	AA	AA	AB	AA	AA	AA	AA	AB	AB	AB	AA	AA	AA	AA	AB	AA	BB	AB	AA	AB	AB	AB	BB	AB	BB	AB	BB	AA	BB	AB
rs13477506	3	155444424	AB	AB	AA	AB	AB	AB	AA	AB	AA	BB	AB	AA	AB	AA	BB	AA	AB	AA	AA	AA	AA	AA	AA	AB	AA	AA	AA	AA	AA	AB	AB	AA	AA	AB	AB	AA	AB	AB	AB	AB	AB	AB	AB	AB	AA	BB	AB
gnf03.160.599	3	157755333	BB	BB	BB	BB	BB	BB	BB	BB	BB	BB	BB	BB	BB	BB	BB	BB	BB	BB	BB	BB	BB	BB	BB	BB	BB	BB	BB	BB	BB	BB	BB	BB	BB	BB	BB	BB	BB	BB	BB	BB	BB	BB	BB	BB	BB	BB	BB
CEL-3_159340478	3	159340478	AB	AB	AB	AA	AB	AB	BB	AB	BB	AA	AB	AB	AB	BB	AA	BB	AA	BB	AA	AB	BB	AB	AB	AB	AB	AB	AB	BB	AB	AB	AB	AB	BB	AA	AB	BB	AB	AB	AB	AA	AB	AB	AB	AB	BB	AA	AB
rs3695715	4	3649824	BB	BB	BB	BB	BB	BB	BB	BB	BB	BB	BB	BB	BB	BB	BB	BB	BB	BB	BB	BB	BB	BB	BB	AB	BB	BB	BB	AB	BB	BB	BB	AB	AB	BB	BB	BB	BB	BB	BB	BB	BB	BB	BB	BB	BB	BB	BB
gnf04.002.008	4	5013576	BB	BB	BB	BB	BB	BB	BB	BB	BB	BB	BB	BB	BB	BB	BB	BB	BB	BB	BB	BB	BB	BB	BB	BB	BB	BB	BB	BB	BB	BB	BB	BB	BB	BB	BB	BB	BB	BB	BB	BB	BB	BB	BB	BB	BB	AB	BB
gnf04.002.599	4	5606396	BB	BB	BB	BB	BB	BB	BB	BB	BB	BB	BB	BB	BB	BB	BB	BB	BB	BB	BB	BB	BB	BB	BB	BB	BB	BB	BB	BB	BB	BB	BB	BB	BB	BB	BB	BB	BB	BB	BB	BB	BB	BB	BB	BB	BB	AB	BB
rs3660863	4	7127435	BB	AA	BB	BB	AB	BB	AA	AA	BB	AB	AB	BB	AB	AB	AB	BB	AB	AA	BB	BB	BB	AA	BB	BB	AB	BB	AB	AA	AB	AB	AA	AB	AA	AB	AB	AB	AA	AA	BB	BB	AB	AB	AB	AB	AA	AB	AB
UT_4_10.84692	4	10825412	BB	BB	BB	BB	BB	BB	BB	BB	BB	BB	BB	BB	BB	BB	BB	BB	BB	BB	BB	BB	BB	BB	BB	BB	BB	BB	BB	BB	BB	BB	BB	BB	BB	AB	AB	AB	AA	AA	BB	BB	AB	AB	AB	AB	AA	AA	AB
rs13477568	4	13764168	AA	AA	AA	AA	AA	AA	AA	AA	AA	AA	AA	AA	AA	AA	AA	AA	AA	AA	AA	AA	AA	AA	AA	AA	AA	AA	AA	AA	AA	AB	AA	AA	AA	AA	AA	AA	AA	AA	AA	AA	AA	AA	AA	AA	AA	AA	AA
mCV22939387	4	15321444	BB	AA	BB	BB	AB	BB	AA	AA	BB	AB	AB	BB	AB	AB	AB	BB	AB	AA	BB	AB	BB	AA	BB	AB	AB	BB	AB	AA	AB	AB	AA	AB	AA	BB	AB	AA	AB	AB	AB	BB	BB	AB	AA	AB	AB	AB	AB
rs6287606	4	18045313	AA	BB	AA	AA	AB	AA	BB	BB	AA	AB	AB	AA	AB	AB	AB	AA	AB	BB	AA	AB	AA	BB	AA	AB	AB	AA	AB	BB	AB	AA	BB	AB	BB	BB	BB	BB	BB	AB	AB	BB	AB	BB	BB	BB	BB	BB	BB
CEL-4_19508304	4	19508304	AA	AA	AA	AA	AA	AA	AA	AA	AA	AA	AA	AA	AA	AA	AA	AA	AA	AA	AA	AA	AA	AA	AA	AA	AA	AA	AA	AA	AA	AA	AA	AA	AA	AA	AA	AB	AA	AA	AB	AA	AA	AB	AB	AB	AA	AA	AB
rs13477596	4	20665789	AA	BB	AA	AA	AB	AA	BB	BB	AA	AB	AB	AA	AB	AB	AB	AA	AB	BB	AA	AB	AA	BB	AA	AB	AB	AB	AB	BB	AB	AB	BB	AB	BB	BB	BB	AB	BB	BB	AB	BB	BB	AB	AB	AB	BB	BB	AB
gnf04.019.134	4	22305486	AA	AA	AA	AA	AA	AA	AA	AA	AA	AA	AA	AA	AA	AA	AA	AA	AA	AA	AA	AA	AA	AA	AA	AA	AA	AA	AA	AA	AA	AA	AA	AA	AA	AA	AA	AA	AA	AA	AA	AA	AA	AA	AA	AA	AA	AB	AA
mCV22919271	4	24149712	AA	AA	AA	AA	AA	AA	AA	AA	AA	AA	AA	AA	AA	AA	AA	AA	AA	AA	AA	AA	AA	AA	AA	AA	AA	AA	AA	AB	AA	AB	AA	AB	AB	AA	AA	AA	AA	AA	AA	AA	AA	AA	AA	AA	AA	AB	AA
rs13477617	4	27105003	AA	BB	AA	AA	AB	AA	BB	BB	AA	AB	AB	AA	AB	AB	AB	AA	AB	BB	AA	AA	AA	BB	AA	AB	AB	AB	AB	AB	AB	AB	BB	AA	AB	AA	AA	AA	AA	AA	AB	AA	AA	AB	AB	AB	AA	AA	AB
rs3701432	4	29487208	BB	BB	BB	BB	BB	BB	BB	BB	BB	BB	BB	BB	BB	BB	BB	BB	BB	BB	BB	BB	BB	BB	BB	BB	BB	BB	BB	BB	BB	BB	BB	BB	BB	BB	BB	AB	BB	AB	AB	BB	AB	BB	BB	BB	BB	AB	BB
CEL-4_30653207	4	30653207	AA	AA	AA	AA	AA	AA	AA	AA	AA	AA	AA	AA	AA	AA	AA	AA	AA	AA	AA	AB	AA	AA	AA	AA	AA	AA	AA	AB	AA	AB	AA	AB	AB	BB	BB	AB	BB	BB	AB	BB	BB	AB	AB	AB	BB	BB	AB
rs3663744	4	31215491	BB	AA	BB	BB	AB	BB	AA	AA	BB	AB	AB	BB	AB	AB	AB	BB	AB	AA	BB	AB	BB	AA	AB	AB	AB	AB	AB	AB	AB	AB	AA	BB	AB	AB	AB	BB	AB	AB	AB	AA	AA	AB	BB	AB	AB	AB	AB
rs3674908	4	32441103	BB	AA	BB	BB	AB	BB	AA	AA	BB	AB	AB	BB	AB	AB	BB	BB	AB	AA	BB	AB	BB	AA	AB	AB	AB	AB	AB	AB	AB	AB	AA	BB	AB	BB	BB	AB	BB	BB	AB	BB	BB	AB	AB	AB	BB	BB	AB
rs13477643	4	35074381	AA	BB	AA	AA	AB	AA	BB	BB	AA	AB	AB	AA	AB	AB	AA	AA	AB	AB	AA	AB	AA	BB	AB	AB	AB	AB	AB	BB	AB	BB	BB	AB	BB	BB	BB	BB	BB	BB	AB	BB	BB	AB	AB	AB	BB	AB	AB
rs3719299	4	36221145	BB	AA	BB	BB	AB	BB	AB	AA	BB	AB	AB	BB	AB	AB	BB	BB	AB	AB	BB	BB	BB	AB	AB	AA	AB	AB	AB	AA	AB	AA	AA	AB	AA	BB	BB	BB	BB	BB	BB	BB	BB	BB	BB	BB	BB	BB	BB
rs3684104	4	38414337	BB	AA	BB	BB	AB	BB	AB	AA	BB	AB	AB	BB	AB	AB	BB	BB	AB	AB	BB	AB	BB	AB	AB	AA	AA	AA	AB	AA	AB	AB	AA	AB	AA	AA	AA	AA	AA	AA	AB	AA	AA	AB	AB	AB	AA	AA	AB
rs13477662	4	39882315	BB	AA	BB	BB	AB	BB	AB	AA	BB	AB	AB	BB	AB	AB	BB	BB	AB	AB	BB	BB	BB	AB	AB	AA	AA	AA	AB	AB	AB	AB	AA	BB	AB	BB	BB	BB	BB	BB	BB	BB	BB	BB	BB	BB	BB	BB	BB
CEL-4_40541402	4	40541402	BB	AA	BB	BB	AB	BB	AB	AA	BB	AB	AB	BB	AB	AB	BB	BB	AB	AB	BB	BB	BB	AB	AB	AA	AA	AA	AB	AB	AB	AA	AA	BB	AB	AA	AA	BB	AA	NN	BB	AA	AA	AB	BB	AB	AA	AA	AB
rs3698283	4	42429891	BB	AA	BB	BB	AB	BB	AB	AA	BB	AB	AB	BB	AB	AB	BB	BB	AB	AB	BB	AB	BB	AB	AB	AA	AA	AA	AA	AB	AB	AA	AA	AB	AB	AA	AA	AA	AA	AA	AA	AA	AB	AB	AA	AB	AA	AB	AB
rs13477676	4	44111689	AA	AA	AA	AA	AA	AA	AA	AA	AA	AA	AA	AA	AA	AA	AA	AA	AA	AA	AA	AA	AA	AA	AA	AA	AA	AA	AA	AA	AA	AB	AA	AA	AA	AA	AA	AB	AA	AA	AB	AA	AB	BB	AB	BB	AA	AB	AB
rs13477681	4	45420449	BB	BB	BB	BB	BB	BB	BB	BB	BB	BB	BB	BB	BB	BB	BB	BB	BB	BB	BB	AB	BB	BB	BB	AB	BB	BB	BB	BB	AB	BB	AB	AB	BB	BB	BB	AB	BB	BB	AB	BB	BB	AB	AB	AB	BB	BB	BB
rs3676423	4	51035410	AB	AB	BB	AA	AA	AB	AB	AA	AB	AB	AB	BB	AA	AB	AB	AB	BB	AB	BB	AB	AB	AB	BB	AB	AA	AA	AA	AB	BB	AB	AB	AB	AB	AB	AA	BB	AB	BB	AB	AB	AB	AA	AB	AA	AB	AA	BB
rs13477709	4	52679398	BB	BB	BB	BB	BB	BB	BB	BB	BB	BB	BB	BB	BB	BB	BB	BB	BB	BB	BB	BB	BB	BB	BB	BB	BB	BB	BB	BB	BB	BB	BB	BB	BB	BB	BB	BB	BB	BB	BB	BB	BB	BB	BB	AB	BB	BB	BB
rs6239799	4	55765284	AA	AA	AA	BB	AB	BB	AB	AA	AB	AA	AA	AA	AA	AB	AA	AB	AA	AA	AA	AA	AA	AA	AA	AA	AA	AA	AA	AA	AA	AA	AA	AA	AA	AA	AA	AA	AA	AA	AA	AA	AB	BB	AA	AB	AA	AB	AA
rs13477726	4	57030578	BB	BB	BB	BB	BB	BB	BB	BB	BB	BB	BB	BB	BB	BB	BB	BB	BB	BB	BB	BB	BB	BB	BB	AB	BB	BB	BB	BB	BB	BB	BB	AB	BB	BB	AB	AB	BB	BB	AB	AB	BB	BB	BB	AB	BB	BB	BB
rs3712541	4	59103430	AB	AB	AA	AA	AB	AA	AB	AB	AA	AB	AB	AA	BB	AA	AB	BB	AA	AB	AA	AA	AB	AB	AA	AB	BB	BB	BB	AA	AA	BB	AB	AB	AB	BB	AB	AB	BB	BB	AB	AB	BB	AB	BB	AA	BB	AB	BB
rs6254381	4	62013092	BB	BB	BB	BB	BB	BB	BB	BB	BB	BB	BB	BB	BB	BB	BB	BB	BB	BB	BB	BB	BB	BB	BB	BB	BB	BB	BB	BB	BB	BB	BB	BB	BB	BB	BB	BB	BB	BB	BB	BB	BB	BB	BB	BB	BB	BB	BB
rs13477749	4	64811196	AA	AA	AA	AA	AA	AA	AA	AA	AA	AA	AA	AA	AA	AA	AA	AA	AA	AA	AA	AA	AA	AA	AA	AA	AB	AB	AB	AA	AA	AA	AA	AB	AA	AA	AA	AA	AA	AA	AA	AA	AA	AA	AA	AA	AA	AA	AA
rs3710245	4	68727690	AA	AA	AA	AA	AA	AA	AA	AA	AA	AA	AA	AA	AA	AA	AA	AA	AA	AA	AA	AA	AA	AA	AA	AA	AA	AA	AA	AA	AA	AA	AA	AA	AA	AA	BB	AA	AA	AA	AA	BB	AA	AA	AA	AA	AA	AA	AA
rs13477765	4	69553312	AB	AB	AA	BB	BB	BB	AB	AB	AB	AB	AB	AB	BB	AA	AB	BB	AA	AB	AB	AB	AB	AB	AA	BB	BB	BB	BB	AB	AB	BB	AA	AB	BB	BB	BB	BB	BB	BB	BB	BB	BB	BB	BB	BB	BB	BB	BB
rs6222684	4	70467819	AB	AB	BB	BB	AB	BB	AB	AB	BB	AB	AB	AB	AA	BB	AB	AA	BB	AB	AB	AB	AB	AB	BB	AA	AB	AB	AB	AB	AB	AA	BB	BB	AA	AB	AB	AB	AB	AA	AB	AA	AA	AB	AA	BB	AB	BB	AA
rs13477774	4	71868643	BB	BB	BB	BB	BB	BB	BB	BB	BB	BB	BB	BB	BB	BB	BB	BB	BB	BB	BB	BB	BB	BB	BB	BB	BB	BB	BB	BB	BB	BB	BB	BB	BB	BB	BB	BB	BB	BB	BB	BB	BB	BB	BB	BB	BB	BB	BB
rs13477785	4	74403260	BB	BB	BB	BB	BB	BB	BB	BB	BB	BB	BB	BB	BB	BB	BB	BB	BB	BB	BB	BB	BB	BB	BB	BB	BB	BB	BB	BB	BB	BB	BB	BB	BB	BB	BB	BB	BB	BB	BB	BB	BB	BB	BB	BB	BB	BB	BB
CEL-4_77952063	4	77952063	BB	BB	BB	BB	BB	BB	BB	BB	BB	BB	BB	BB	BB	BB	BB	BB	BB	BB	BB	AB	BB	BB	BB	BB	AA	AB	AA	AB	BB	BB	BB	AB	AB	BB	AB	AB	BB	BB	AB	AB	BB	AB	BB	AA	BB	AB	BB
rs4139273	4	79969982	AA	AA	AA	AA	AA	AA	AA	AA	AA	AA	AA	AA	AA	AA	AA	AA	AA	AA	AA	AB	AA	AA	AA	AA	AB	AB	AB	AA	AA	AA	AA	AB	AA	AB	AB	BB	AB	BB	BB	BB	BB	BB	BB	BB	AB	AB	BB
rs3699276	4	81462943	AA	AA	AA	BB	AB	BB	AA	AA	AB	AA	AA	AA	AA	AA	AA	AA	AA	AA	AA	BB	AA	AA	AA	AA	BB	AB	BB	AB	AA	AA	AB	AB	AB	AB	AA	BB	AB	BB	BB	AB	BB	AB	BB	AB	AB	AA	BB
rs3711477	4	84506191	AB	AB	AA	AB	BB	BB	AB	AB	AB	AB	AB	AB	AB	AA	AB	BB	AA	AB	AB	AA	AB	AB	AA	BB	AA	AB	AA	AA	AB	BB	AA	AA	AB	AB	AB	BB	AB	BB	BB	BB	BB	BB	BB	BB	AB	BB	BB
rs6209043	4	88269130	AA	AA	AB	AB	AB	BB	AA	AA	AA	AA	AB	AB	AA	AA	AB	AB	AA	AA	AA	AB	AA	AA	AA	AA	AA	AA	AA	AA	AA	AA	AA	AA	AA	AB	AB	BB	AB	BB	BB	BB	BB	AB	BB	BB	AB	BB	BB
rs13477838	4	89450763	AB	AB	AB	BB	BB	BB	BB	AB	BB	AB	AB	AB	AB	AB	BB	AB	AB	BB	BB	BB	AB	AB	BB	BB	BB	BB	BB	BB	BB	BB	BB	BB	BB	BB	AA	BB	BB	BB	BB	AA	BB	AA	BB	AA	BB	AA	BB
rs6271003	4	91308682	AB	AB	AA	AA	AA	AA	AB	AB	AA	AB	AB	AB	AB	AA	AA	AB	AA	AB	AB	AB	AA	AB	AA	BB	AA	AB	AA	AA	AB	AB	AA	AA	AB	BB	BB	AB	BB	BB	AB	BB	BB	BB	BB	AB	BB	AB	BB
rs3659791	4	94278186	AA	AA	AA	AA	AA	AA	AA	AA	AA	AA	AA	AA	AA	AA	AA	AA	AA	AA	AA	BB	AA	AA	AA	AA	AB	AB	AB	AA	AA	AA	AA	AA	AA	BB	AB	AB	BB	BB	AB	AB	BB	AA	BB	AA	BB	AA	BB
rs13477860	4	95674511	BB	BB	BB	BB	BB	BB	BB	BB	BB	BB	BB	BB	BB	BB	BB	BB	BB	BB	BB	BB	BB	BB	BB	BB	BB	BB	BB	BB	BB	BB	BB	BB	BB	BB	BB	BB	BB	BB	BB	BB	BB	BB	BB	BB	BB	BB	BB
rs13477866	4	97650355	AB	AB	AB	AA	AB	AA	AB	AB	BB	AB	AA	AA	AB	BB	AB	AA	BB	AB	BB	BB	AB	AB	BB	AB	BB	AB	BB	BB	AB	AB	BB	BB	AB	BB	BB	AB	BB	BB	AB	BB	BB	AB	BB	AB	BB	AB	BB
rs13477873	4	99775886	AA	AA	AA	AA	AA	AA	AA	AA	AA	AA	AA	AA	AA	AA	AA	AA	AA	AA	AA	AB	AA	AA	AA	AA	AA	AA	AA	AA	AA	AB	AA	AA	AA	AB	AB	AB	AB	BB	AB	BB	BB	AB	BB	AB	AB	AB	BB
rs6315002	4	101395000	AB	AB	AB	BB	AB	BB	AA	AB	AA	AB	BB	BB	AB	AA	AB	BB	AA	AB	AA	AA	AB	AB	AA	AB	AA	AB	AA	AA	AB	BB	AA	AA	AB	AA	AA	AB	AA	AA	AB	AA	AA	AB	AA	AB	AA	AB	AA
rs13477883	4	102307704	AA	AA	AA	AA	AA	AA	AA	AA	AA	AA	AA	AA	AA	AA	AA	AA	AA	AA	AA	AA	AA	AA	AA	AB	AA	AA	AA	AA	AA	AA	AA	AA	AA	AA	AA	AA	AA	AA	AA	AA	AA	AA	AA	AA	AA	AA	AA
rs6324470	4	104323754	BB	BB	BB	BB	BB	BB	BB	BB	BB	BB	BB	BB	BB	BB	BB	BB	BB	BB	BB	AB	BB	BB	BB	AB	BB	BB	BB	BB	BB	BB	BB	BB	BB	AB	BB	AB	BB	BB	BB	BB	BB	AB	BB	AB	BB	AB	BB
rs6226080	4	107056497	AA	AA	AA	AA	AA	AA	AA	AA	AA	AA	AA	AA	AA	AA	AA	AA	AA	AA	AA	AA	AA	AA	AA	AA	AA	AA	AA	AA	AA	AA	AA	AA	AA	AA	AA	AA	AA	AA	AA	AA	AA	AA	AA	AA	AA	AA	AA
rs3710617	4	108380717	AB	AB	AB	AB	AB	BB	AA	AB	AA	AB	BB	BB	BB	AB	BB	BB	AA	AB	AA	AB	AB	AB	BB	AB	AA	AB	AA	AA	AB	AB	AB	AA	AB	AA	AA	AB	AA	AA	AA	AA	AA	AB	AA	AB	AA	AB	AA
rs3709486	4	109968331	AB	AB	AB	AB	AB	BB	AA	AB	AA	AB	BB	BB	BB	AB	BB	BB	AA	AB	AA	AB	AB	AB	BB	AB	AA	AB	AA	AA	AB	BB	AB	AB	BB	AB	AA	AA	AA	AA	AA	AA	AA	AA	AA	AA	AA	AA	AA
rs6381371	4	114381685	AB	AB	AB	AB	AB	AA	BB	AB	BB	AB	AA	AA	AA	AB	AA	AA	BB	AB	BB	AA	AB	AB	AA	AA	AB	AA	AB	BB	AB	AA	AB	AB	AA	AA	AA	AB	AB	AA	AA	AA	AA	AB	AA	AB	AA	AB	AA
rs3692563	4	116737689	AA	AA	AA	AA	AA	AA	AA	AA	AA	AA	AA	AA	AA	AA	AA	AA	AA	AA	AA	AA	AA	AA	AA	AA	AA	AA	AA	AA	AA	AA	AA	AA	AA	AA	AA	AA	AA	AA	AA	AA	AA	AA	AA	AA	AA	AA	AA
rs3675629	4	119404209	AA	AA	AA	AA	AA	AA	AA	AA	AA	AA	AA	AA	AA	AA	AA	AA	AA	AA	AA	AA	AA	AA	AA	AA	BB	AB	BB	AB	AA	AB	AA	AB	AB	AA	AA	AB	AA	AA	AA	AA	AA	AA	AA	AB	AA	AB	AA
rs13477952	4	121322200	AB	AB	AB	AB	AB	AA	BB	AB	AB	AB	AA	AA	AA	AB	AA	AA	BB	AB	BB	AB	BB	AB	AA	AA	AB	AA	AA	AB	AB	AA	AB	BB	AB	AA	AA	AA	AA	AA	AA	AA	AA	AA	AA	AA	AA	AA	AA
rs13477959	4	122566268	AB	AB	AB	AB	AB	AA	BB	AB	AB	AB	AA	AA	AA	AB	AA	AA	BB	AB	BB	AA	BB	BB	AA	AA	AB	AB	BB	BB	AB	AB	AB	AB	AA	AB	AA	AB	AA	AA	AA	AA	AA	AB	AA	AA	AA	AA	AA
rs13477965	4	125082422	AB	AB	AB	AB	AB	BB	AA	AB	AB	AB	BB	BB	BB	AB	AB	BB	AA	AB	AB	AB	AA	AA	BB	BB	AA	AB	AB	AA	AA	AB	AA	AA	AA	AA	AA	AA	AA	AA	AA	AA	AA	AA	AA	AB	AA	AB	AA
gnf04.123.367	4	126400415	BB	BB	BB	AB	AB	AA	BB	BB	AB	BB	AB	AB	AB	AB	AB	AB	BB	BB	BB	AB	BB	BB	AA	AA	BB	BB	BB	BB	BB	BB	BB	BB	BB	AA	BB	AB	AB	AA	AA	AB	AA	AB	AA	AB	AB	AB	AA
rs3663950	4	134187547	BB	BB	BB	BB	BB	BB	BB	BB	BB	BB	BB	BB	BB	BB	BB	BB	BB	BB	BB	BB	BB	BB	BB	BB	BB	BB	BB	BB	BB	BB	BB	BB	BB	BB	BB	BB	BB	BB	BB	BB	BB	BB	BB	BB	BB	BB	BB
rs3688566	4	140026440	AA	AA	AA	AA	AA	AA	AA	AA	AA	AA	AA	AA	AA	AA	AA	AA	AA	AA	AA	AA	AA	AA	AA	AA	AB	AA	AB	AB	AA	AA	AA	AB	AB	AA	AA	AA	AA	AA	AA	AA	AA	AA	AA	AA	AA	AA	AA
rs3719891	4	140961583	AA	AA	AA	AA	AA	AA	AA	AA	AA	AA	AA	AA	AA	AA	AA	AA	AA	AA	AA	AA	AA	AA	AA	AA	AA	AA	AA	AA	AA	AB	AA	AA	AA	AB	BB	BB	BB	BB	AB	BB	AB	BB	AA	BB	AB	BB	BB
rs6268364	4	149902058	BB	BB	BB	BB	BB	BB	BB	BB	BB	BB	BB	BB	BB	BB	BB	BB	BB	BB	BB	BB	BB	BB	BB	BB	BB	BB	BB	BB	AB	BB	BB	BB	BB	BB	BB	BB	BB	BB	BB	BB	BB	BB	BB	BB	BB	BB	BB
rs13478068	4	153104114	BB	BB	BB	BB	BB	BB	BB	BB	BB	BB	BB	BB	BB	BB	BB	BB	BB	BB	BB	BB	BB	BB	BB	BB	BB	BB	BB	BB	BB	AB	BB	BB	BB	BB	AB	BB	BB	BB	BB	BB	BB	BB	BB	BB	BB	BB	BB
rs6279100	4	154069720	AA	AA	AA	AB	BB	AA	AA	AA	AB	AA	AA	AA	AB	AA	AA	AB	AB	AA	AA	BB	AA	AA	AB	AB	BB	AB	AB	BB	AA	AA	BB	BB	AB	BB	BB	BB	BB	BB	BB	BB	BB	BB	BB	BB	BB	BB	BB
rs13478092	5	3601413	AA	AA	AA	AA	AA	AA	AA	AA	AA	AA	AA	AA	AA	AA	AA	AA	AA	AA	AA	AA	AA	AA	AA	AA	AA	AA	AA	AA	AA	AA	AA	AA	AA	AA	AB	AA	AA	AA	AA	AB	AA	AA	AA	AA	AA	AA	AA
rs13478094	5	4310159	BB	AB	AA	AB	AB	AA	AA	AA	BB	AB	AB	AB	AB	AA	AA	AB	AA	AB	AA	AB	AB	AB	AB	BB	BB	BB	BB	AB	AB	AB	AB	BB	AA	BB	AB	AA	AA	AB	AA	AB	AB	BB	AA	BB	AA	BB	AB
rs3664617	5	4474737	AA	AA	AA	AA	AA	AA	AA	AA	AA	AA	AA	AA	AA	AA	AA	AA	AA	AA	AA	BB	AA	AA	AA	AB	AA	AA	AA	AB	AA	AA	AA	AA	AB	AA	AA	AA	AA	AA	AA	AA	AB	AB	AA	AA	AA	AA	AA
rs6402980	5	5438798	AB	AB	AB	AB	AB	AB	AB	AB	AA	AB	AB	AB	AB	AB	AB	AB	AB	AB	AB	AA	AB	AB	AB	AB	AB	AB	AB	AA	AB	AB	AB	AB	AB	BB	AA	AA	AA	AB	AA	AB	AA	AA	AA	AB	AA	AB	AB
rs6307393	5	7652759	AB	AB	AA	AB	AB	AA	AB	AA	BB	AA	AA	AB	AB	AB	AA	AA	AA	BB	AB	AA	AB	AA	AB	AB	AB	AB	AB	AB	AB	AA	AB	AB	AA	AA	AA	AA	AA	AA	AA	AA	AA	AA	AA	AA	AA	AA	AA
rs13478110	5	9748059	BB	BB	BB	BB	BB	BB	BB	BB	BB	BB	BB	BB	BB	BB	BB	BB	BB	BB	BB	BB	BB	BB	BB	BB	BB	BB	BB	BB	BB	BB	BB	BB	BB	AA	BB	AA	AA	AA	AA	AB	AA	AA	AA	AA	AA	AA	AA
rs3714258	5	11417181	AA	AA	AA	AA	AA	AA	AA	AA	AA	AA	AA	AA	AA	AA	AA	AA	AA	AA	AA	AB	AA	AA	AA	AA	AA	AA	AA	AA	AA	AA	AA	AA	AA	AA	AA	AA	AA	AA	AA	AA	AA	AA	AA	AA	AA	AA	AA
rs3687916	5	13389454	AB	BB	AB	BB	BB	AB	BB	BB	BB	AB	AB	AB	BB	AB	BB	AB	BB	BB	BB	AB	AB	AB	BB	AB	BB	BB	BB	BB	AB	AB	AB	BB	AB	BB	AB	BB	BB	BB	BB	AB	BB	BB	BB	BB	BB	BB	BB
rs6353097	5	13875606	BB	BB	BB	BB	BB	BB	BB	BB	BB	BB	BB	BB	BB	BB	BB	BB	BB	BB	BB	AB	BB	BB	BB	AB	BB	BB	BB	BB	BB	BB	BB	BB	BB	BB	AB	AA	AA	AB	AA	BB	AB	AB	AB	AB	AA	AB	AB
rs3692039	5	16224015	AA	AA	AA	AA	AA	AA	AA	AA	AA	AA	AA	AA	AA	AA	AA	AA	AA	AA	AA	AB	AA	AA	AA	AA	AB	AB	AB	AB	AA	AA	AA	AB	AB	AB	AB	BB	BB	AB	BB	AB	BB	BB	AB	AB	BB	AB	AB
rs6234642	5	17667733	BB	BB	BB	BB	BB	BB	BB	BB	BB	BB	BB	BB	BB	BB	BB	BB	BB	BB	BB	AB	BB	BB	BB	BB	AB	AB	AB	BB	BB	AB	BB	AB	BB	AA	AB	AA	AA	AB	AA	AB	AB	AB	AB	AB	AA	AB	AB
rs13478133	5	19993162	BB	BB	BB	BB	BB	BB	BB	BB	BB	BB	BB	BB	BB	BB	BB	BB	BB	BB	BB	BB	BB	BB	BB	BB	BB	BB	BB	BB	BB	BB	BB	BB	BB	BB	BB	BB	BB	BB	BB	BB	BB	BB	BB	BB	BB	BB	BB
rs13478139	5	21398479	AB	BB	BB	BB	BB	BB	AB	BB	AB	BB	BB	AB	AB	AB	AB	BB	BB	AB	AB	BB	AB	BB	BB	AB	AB	AB	AB	AB	AB	BB	AB	AB	BB	AB	AB	AA	AA	AA	AA	AB	AB	AB	AB	AB	AA	AB	AB
rs6349956	5	23273638	AB	AA	AA	AA	AA	AA	AB	AA	AB	AA	AA	AB	AB	AB	AB	AA	AA	AB	AB	AA	AB	AA	AA	AB	AB	AB	AB	BB	AB	AA	AB	AB	AA	AB	AB	AA	AA	AA	AA	AB	AA	AA	AB	AB	AA	AB	AB
CEL-5_24211033	5	24211033	AA	BB	AB	BB	BB	AB	AB	BB	AB	AB	BB	AA	AB	AA	AB	AB	BB	AB	AB	AA	AB	AB	BB	AA	AA	AA	AA	AA	AA	AA	AA	AA	AA	AA	AA	AA	AA	AA	AA	AA	AA	AA	AA	AA	AA	AA	AA
rs13478154	5	25501830	BB	BB	BB	BB	BB	BB	BB	BB	BB	BB	BB	BB	BB	BB	BB	BB	BB	BB	BB	AB	BB	BB	BB	BB	BB	BB	BB	BB	BB	BB	BB	BB	BB	BB	BB	BB	BB	BB	BB	BB	BB	BB	BB	BB	BB	BB	BB
rs3696671	5	26095730	AB	BB	BB	BB	BB	BB	AB	BB	BB	BB	BB	BB	AB	BB	AB	BB	BB	BB	BB	BB	BB	BB	BB	AB	AA	AA	AB	AB	AB	BB	AB	AA	AB	AB	AA	AA	AA	AA	AA	AB	AA	AA	AA	AA	AA	AA	AA
rs3680434	5	27162034	BB	BB	BB	BB	BB	BB	BB	BB	BB	BB	BB	BB	BB	BB	BB	BB	BB	BB	BB	AB	BB	BB	BB	BB	BB	BB	BB	BB	BB	BB	BB	BB	AB	AB	AB	BB	BB	BB	BB	AB	BB	BB	BB	BB	BB	BB	BB
rs13469943	5	29486094	AB	BB	AB	BB	BB	AB	BB	BB	AB	AB	BB	AB	BB	AA	BB	AB	BB	AB	AB	BB	AA	AB	BB	AB	BB	BB	BB	AB	AB	AA	AB	BB	BB	AB	BB	BB	BB	BB	AB	AB	AB	AB	BB	BB	BB	BB	BB
rs3700706	5	31071103	BB	BB	BB	BB	BB	BB	BB	BB	BB	BB	BB	BB	BB	BB	BB	BB	BB	BB	BB	AB	BB	BB	BB	BB	BB	BB	BB	BB	BB	BB	BB	BB	BB	BB	BB	BB	BB	BB	BB	BB	BB	BB	AB	BB	BB	BB	BB
rs13459085	5	33353887	BB	BB	BB	BB	BB	AB	AB	BB	BB	BB	BB	BB	BB	AB	BB	AB	AB	BB	BB	BB	BB	BB	BB	BB	BB	BB	BB	BB	AB	BB	BB	BB	BB	BB	BB	BB	BB	BB	BB	BB	BB	BB	BB	BB	BB	BB	BB
rs3673363	5	33963604	AB	BB	AB	BB	BB	AB	BB	BB	AB	AB	BB	AB	BB	AA	BB	AB	BB	AB	AB	AA	AA	AB	BB	BB	BB	BB	BB	AB	AB	AB	AB	BB	AB	AB	BB	BB	BB	BB	BB	BB	BB	BB	AB	BB	BB	BB	BB
rs6341620	5	35567326	AB	BB	BB	BB	BB	BB	AB	BB	BB	BB	BB	BB	AA	BB	AB	BB	BB	AB	BB	BB	BB	BB	BB	AA	AA	AA	AA	AB	AB	AB	AB	AA	AB	AA	AB	BB	BB	BB	AB	AB	AB	AA	AB	AB	BB	AB	BB
rs6256504	5	38327673	AA	AA	AA	AA	AA	AA	AA	AA	AA	AA	AA	AA	AA	AA	AA	AA	AA	AA	AA	AA	AA	AA	AA	AB	AA	AA	AA	AA	AA	AA	AA	AA	AA	AB	AA	AA	AA	AA	AB	AB	AB	AB	AB	AA	AA	AA	AA
rs13478205	5	39608047	BB	BB	BB	BB	BB	BB	BB	BB	BB	BB	BB	BB	BB	BB	BB	BB	BB	BB	BB	AB	BB	BB	BB	BB	BB	BB	BB	BB	BB	BB	BB	BB	BB	BB	AB	AA	AA	AA	AB	AB	AB	BB	AB	AB	AA	AB	AB
rs6215373	5	42914749	AA	AA	AA	AA	AA	AA	AA	AA	AA	AA	AA	AA	AA	AA	AA	AA	AA	AA	AA	BB	AA	AA	AA	AA	AA	AA	AA	AA	AA	AA	AA	AA	AB	AA	AA	AA	AA	AA	AA	AA	AA	AA	AA	AA	AA	AA	AA
rs13478223	5	43971357	AA	AA	AA	AA	AA	AA	AA	AA	AA	AA	AA	AA	AA	AA	AA	AA	AA	AA	AA	AA	AA	AA	AA	AA	AA	AA	AA	AA	AA	AA	AA	AA	AA	AA	AA	AA	AA	AA	AA	AA	AA	AA	AA	AA	AA	AA	AA
rs3659933	5	44700900	AB	BB	AB	BB	BB	BB	BB	BB	AB	AB	BB	AB	BB	AA	BB	AB	BB	AB	AB	AA	AA	AB	AB	BB	BB	BB	BB	AB	AB	AA	AB	BB	AB	AA	AB	AA	AA	AA	AB	AA	AB	BB	AB	AB	AA	AB	AA
CEL-5_45872918	5	45872918	AB	AA	AB	AA	AA	AA	AA	AA	AB	AB	AA	AB	AA	BB	AA	AB	AA	AB	AB	AA	BB	AB	AB	AB	AA	AA	AA	AB	AB	BB	AB	AA	AA	AB	AB	AA	AA	AA	AA	AB	AA	AB	AA	AB	AA	AB	AA
rs6192958	5	47975043	AA	AA	AA	AA	AA	AA	AA	AA	AA	AA	AA	AA	AA	AA	AA	AA	AA	AA	AA	BB	AA	AA	AA	AA	AB	AB	AA	AA	AA	AB	AA	BB	AA	AA	AB	BB	BB	BB	AB	AB	AB	AA	BB	AB	BB	AB	BB
rs3660964	5	51028268	AB	AA	AA	AA	AA	AA	AB	AA	AA	AA	AA	AA	BB	AA	AB	AA	AA	AB	AA	AA	AA	AA	AA	BB	BB	BB	BB	AB	AB	AB	AB	BB	AB	BB	AB	BB	BB	BB	AB	BB	AB	AA	BB	AB	BB	AB	BB
rs3664008	5	52283097	BB	BB	BB	BB	BB	BB	BB	BB	BB	BB	BB	BB	BB	BB	BB	BB	BB	BB	BB	BB	BB	BB	BB	BB	BB	BB	BB	BB	BB	AB	BB	AB	BB	AA	BB	BB	BB	BB	BB	AB	BB	BB	BB	BB	BB	BB	BB
mCV23125912	5	53853311	BB	BB	BB	BB	BB	BB	BB	BB	BB	BB	BB	BB	BB	BB	BB	BB	BB	BB	BB	BB	BB	BB	BB	BB	BB	BB	BB	BB	BB	BB	BB	BB	BB	BB	BB	BB	BB	BB	BB	BB	BB	BB	BB	BB	BB	BB	BB
CEL-5_56167948	5	56167948	BB	BB	BB	BB	BB	BB	BB	BB	BB	BB	BB	BB	BB	BB	BB	BB	BB	BB	BB	AB	BB	BB	BB	AB	BB	BB	BB	BB	BB	BB	BB	BB	BB	BB	BB	BB	BB	BB	BB	BB	BB	BB	BB	BB	BB	BB	BB
rs3090667	5	58891807	BB	BB	BB	BB	BB	BB	BB	BB	BB	BB	BB	BB	BB	BB	BB	BB	BB	BB	BB	BB	BB	BB	BB	AB	BB	BB	BB	BB	BB	AB	BB	AB	BB	BB	BB	AA	AB	AB	AB	BB	BB	BB	AB	AB	AA	AB	AB
rs6354160	5	60155561	AA	AA	AA	AA	AA	AA	AA	AA	AA	AA	AA	AA	AA	AA	AA	AA	AA	AA	AA	AA	AA	AA	AA	AA	AA	AA	AA	AA	AA	AB	AA	AB	AA	AB	AA	AA	AA	AA	AA	AA	AA	AA	AB	AA	AA	AA	AA
rs6187409	5	61437749	AB	AB	AA	AA	AA	AA	BB	AB	AA	AB	AB	BB	BB	AA	BB	AA	BB	AB	AA	AA	AB	AB	AB	AB	AB	BB	AB	AA	AB	AB	AA	BB	AB	BB	BB	BB	BB	BB	BB	BB	BB	BB	BB	BB	BB	BB	BB
mCV23386455	5	62818443	BB	BB	BB	BB	BB	BB	BB	BB	BB	BB	BB	BB	BB	BB	BB	BB	BB	BB	BB	BB	BB	BB	BB	BB	BB	BB	BB	BB	BB	BB	BB	BB	BB	BB	BB	BB	BB	BB	BB	BB	AB	AB	AB	AB	AB	AB	AB
rs4225248	5	65265514	AA	AA	AA	AA	AA	AA	AA	AA	AA	AA	AA	AA	AA	AA	AA	AA	AA	AA	AA	AA	AA	AA	AA	AA	AB	AB	AA	AA	AA	AB	AA	AB	AA	AA	AB	AA	AA	AA	AA	AA	AA	AB	AA	AB	AA	AB	AA
rs13478309	5	65750331	AB	AB	AA	BB	BB	BB	BB	BB	AB	AB	AB	BB	BB	AB	BB	AB	BB	BB	BB	AB	AB	AB	AB	BB	AB	BB	AB	AA	AB	AB	AA	BB	AB	BB	BB	AA	AB	AB	AB	BB	BB	BB	BB	AB	AA	AB	AB
gnf05.061.650	5	65952319	BB	BB	BB	BB	BB	BB	BB	BB	BB	BB	BB	BB	BB	BB	BB	BB	BB	BB	BB	BB	BB	BB	BB	AB	BB	BB	BB	BB	BB	BB	BB	BB	BB	AB	AB	AA	AA	AA	AA	AB	AA	AB	AA	AB	AA	AB	AA
rs3695107	5	69049778	AA	AA	AA	AA	AA	AA	AA	AA	AA	AA	AA	AA	AA	AA	AA	AA	AA	AA	AA	AA	AA	AA	AA	AA	AA	AA	AA	AA	AA	AA	AA	AA	AA	AA	AA	AA	AA	AA	AA	AA	AA	AA	AB	AA	AA	AA	AA
rs6340166	5	71436027	AA	AA	AA	AA	AA	AA	AA	AA	AA	AA	AA	AA	AA	AA	AA	AA	AA	AA	AA	AA	AA	AA	AA	AA	AA	AA	AA	AA	AA	AA	AA	AA	AA	AA	AA	AA	AA	AB	AB	AA	AB	AB	AA	AA	AA	AA	AA
rs6161105	5	73093296	AB	AB	BB	AA	AA	AA	AA	AB	AB	AB	AB	AA	AA	AA	AA	AB	AA	AA	AA	BB	AB	AB	AB	AA	BB	AB	AB	BB	AB	BB	BB	BB	AA	AA	AA	BB	AB	AB	AB	AA	AA	AA	AB	AB	BB	AB	AB
mCV22996021	5	75065363	AA	AA	AA	AA	AA	AA	AA	AA	AA	AA	AA	AA	AA	AA	AA	AA	AA	AA	AA	AA	AA	AA	AA	AB	AA	AA	AB	AA	AA	AA	AB	AA	AB	AA	AA	BB	AB	AB	AB	AA	AA	AA	AB	AB	BB	AB	AB
rs13478337	5	76181811	BB	BB	BB	BB	BB	BB	BB	BB	BB	BB	BB	BB	BB	BB	BB	BB	BB	BB	BB	AB	BB	BB	BB	BB	AB	AB	BB	BB	BB	BB	BB	AA	AB	BB	BB	BB	BB	BB	BB	BB	BB	BB	BB	BB	BB	BB	BB
rs13478352	5	79902641	AA	AB	AA	AA	AA	AA	AA	AA	AA	AB	AB	AB	AA	AB	AB	AA	BB	AB	AA	AA	AB	AA	AA	AB	AA	AB	AA	AA	BB	AB	AA	AA	AB	AB	AA	AA	AA	AA	AA	AB	AA	AA	AA	AA	AA	AA	AA
rs3721607	5	81282125	AA	AB	BB	AA	AB	BB	AB	BB	BB	AA	AB	AB	AA	AA	AA	BB	AA	AA	AB	AB	AB	BB	AB	AA	BB	AB	AB	BB	AA	AA	BB	AB	AB	BB	BB	BB	BB	AB	AB	BB	AB	AB	AB	BB	BB	BB	BB
rs3667334	5	81819770	AA	BB	BB	AA	AB	BB	AB	BB	BB	AB	BB	BB	AA	AB	AB	BB	BB	AB	AB	BB	BB	BB	AB	BB	BB	BB	AB	BB	BB	BB	BB	BB	BB	BB	BB	BB	BB	AB	AB	BB	AB	AB	AB	BB	BB	BB	BB
rs13459087	5	85884364	BB	AB	BB	BB	BB	BB	BB	BB	BB	AB	AB	AB	BB	AB	AB	BB	AA	AB	BB	BB	AB	BB	BB	AB	BB	AB	BB	BB	AA	AB	BB	AB	AA	BB	BB	BB	BB	BB	BB	BB	BB	BB	BB	BB	BB	BB	BB
rs3673049	5	88498569	AA	AA	AA	AA	AA	AA	AA	AA	AA	AA	AA	AA	AA	AA	AA	AA	AA	AA	AA	AA	AA	AA	AA	AA	AA	AA	AA	AA	AA	AA	AA	AA	AA	AA	AA	AA	AA	AA	AA	AA	AA	AA	AA	AA	AA	AA	AA
rs13478388	5	89674255	AB	AA	AA	BB	AB	AB	AB	AA	AA	AA	AA	AA	BB	AB	AB	AB	AB	AB	AB	AB	AA	AA	AB	AB	AA	AB	AB	AA	AB	AB	AA	AA	AB	AB	AA	BB	AB	BB	BB	AB	AB	AB	AA	AB	BB	AB	AB
rs6232866	5	90936845	BB	BB	BB	BB	BB	BB	BB	BB	BB	BB	BB	BB	BB	BB	BB	BB	BB	BB	BB	AB	BB	BB	BB	AB	BB	BB	BB	BB	BB	AB	BB	BB	AB	AB	BB	BB	BB	BB	BB	AB	BB	BB	BB	BB	BB	BB	BB
rs13478402	5	93496397	AA	AB	AA	AA	AA	AA	AA	AA	AA	AB	AB	AB	AA	AB	AB	AA	AB	AB	AA	AA	AB	AA	AA	AB	AA	AA	AB	AA	AB	AB	AA	AB	BB	AA	AA	AA	AA	AA	AA	AA	AA	AA	AA	AA	AA	AA	AA
CEL-5_93945748	5	93945748	AA	AA	AA	AA	AA	AA	AA	AA	AA	AA	AA	AA	AA	AA	AA	AA	AA	AA	AA	AA	AA	AA	AA	AA	AB	AB	AA	AA	AA	AA	AB	AB	AB	BB	BB	BB	BB	BB	BB	BB	BB	BB	BB	BB	BB	BB	BB
rs3661241	5	95154383	AB	AB	BB	AA	AB	AB	AB	BB	BB	AB	AB	AB	AA	AA	AA	AB	AA	AA	AB	BB	AB	BB	AB	BB	BB	AB	AB	BB	AA	AA	BB	AB	AA	BB	BB	BB	BB	BB	BB	BB	BB	BB	BB	BB	BB	BB	BB
rs3705458	5	96618852	AA	AA	AA	AA	AA	AA	AA	AA	AA	AA	AA	AA	AA	AA	AA	AA	AA	AA	AA	AA	AA	AA	AA	AA	AB	AB	AA	AA	AA	AA	AB	AB	AA	AB	BB	AA	AB	AA	AA	AB	AB	AB	AB	AB	AA	AB	AB
rs13478433	5	101291108	AA	AA	AA	AA	AA	AA	AA	AA	AA	AA	AA	AA	AA	AA	AA	AA	AA	AA	AA	AA	AA	AA	AA	AA	AB	AB	AA	AA	AA	AB	AB	AB	AA	AB	AA	AA	AA	AA	AA	AB	AA	AA	AA	AA	AA	AA	AA
rs13478451	5	106102700	AB	BB	BB	AB	AA	AA	AB	BB	AB	BB	BB	BB	AA	AB	AB	AB	AB	AB	AA	BB	AB	BB	AB	BB	AB	AA	BB	AB	AB	AB	AA	AB	BB	AA	AA	BB	AB	AB	AB	AA	AA	AA	AA	AB	BB	AB	AB
rs13459186	5	107435156	AB	BB	BB	AB	AB	AB	AB	BB	BB	BB	BB	BB	AA	AB	AB	AB	AB	AB	AB	AB	BB	BB	AB	BB	BB	AB	BB	BB	AB	AB	BB	BB	BB	AB	AA	AA	AA	AA	AA	AB	AA	AA	AB	AA	AA	AA	AA
UT_5_110.343536	5	108678291	AA	AA	AA	AA	AA	AA	AA	AA	AA	AA	AA	AA	AA	AA	AA	AA	AA	AA	AA	AB	AA	AA	AA	AA	AB	AB	AA	AA	AA	AB	AB	AB	AA	BB	BB	AA	AB	AB	AB	BB	BB	BB	BB	AB	AA	AB	AB
gnf05.106.197	5	109421273	BB	BB	BB	BB	BB	BB	BB	BB	BB	BB	BB	BB	BB	BB	BB	BB	BB	BB	BB	AB	BB	BB	BB	BB	BB	BB	BB	BB	BB	AB	BB	BB	BB	AB	BB	AA	AB	AA	AA	AB	AB	AB	BB	AB	AA	AB	AA
rs13478473	5	111603432	BB	BB	BB	BB	BB	BB	BB	BB	BB	BB	BB	BB	BB	BB	BB	BB	BB	BB	BB	AB	BB	BB	BB	BB	BB	BB	BB	BB	BB	BB	BB	BB	BB	BB	BB	BB	BB	BB	BB	BB	BB	BB	BB	BB	BB	BB	BB
gnf05.110.207	5	113532900	BB	AB	BB	BB	BB	BB	BB	BB	BB	AB	AB	AB	BB	AB	BB	BB	AB	AA	BB	AB	AB	BB	AB	AB	AB	AB	AA	AB	AB	AB	BB	AB	AA	BB	BB	BB	BB	BB	BB	BB	BB	BB	AB	BB	BB	BB	BB
rs13478483	5	115405250	AA	AA	AA	AA	AA	AA	AA	AA	AA	AA	AA	AA	AA	AA	AA	AA	AA	AA	AA	AA	AA	AA	AA	AA	AB	AA	AA	AA	AA	AB	AB	AB	AA	AA	AA	AA	AA	AA	AA	AA	AA	AA	AA	AA	AA	AA	AA
CEL-5_117374791	5	117374791	AA	AA	AA	AA	AA	AA	AA	AA	AA	AA	AA	AA	AA	AA	AA	AA	AA	AA	AA	AA	AA	AA	AA	AA	AA	AA	AA	AA	AA	AA	AA	AA	AA	AA	AA	AA	AA	AA	AA	AA	AA	AA	AA	AA	AA	AA	AA
rs8239888	5	119078055	BB	BB	BB	BB	BB	BB	BB	BB	BB	BB	BB	BB	BB	BB	BB	BB	BB	BB	BB	AB	BB	BB	BB	AB	AB	BB	AB	AB	BB	AB	BB	BB	AB	AB	AA	AB	AB	BB	BB	AB	AB	AB	AA	AB	AB	AB	BB
rs13478496	5	119747337	BB	BB	BB	BB	BB	BB	BB	BB	BB	BB	BB	BB	BB	BB	BB	BB	BB	BB	BB	BB	BB	BB	BB	BB	BB	BB	BB	BB	BB	BB	BB	BB	BB	BB	BB	BB	BB	BB	BB	BB	BB	BB	BB	BB	BB	BB	BB
rs13478501	5	121338564	BB	BB	BB	BB	BB	BB	BB	BB	BB	BB	BB	BB	BB	BB	BB	AB	BB	BB	AB	AB	BB	BB	BB	AB	AB	BB	BB	AB	BB	BB	AA	AB	BB	BB	BB	BB	BB	BB	BB	BB	BB	BB	BB	BB	BB	BB	BB
rs3671202	5	122343598	AA	AA	AA	AA	AA	AA	AA	AA	AA	AA	AA	AA	AA	AA	AA	AB	AA	AA	AB	BB	AA	AA	AA	BB	BB	AA	AB	BB	AA	AB	BB	AB	AB	BB	BB	BB	BB	BB	BB	BB	BB	BB	BB	BB	BB	BB	BB
gnf05.120.129	5	123654667	AA	AA	AA	AA	AA	AA	AA	AA	AA	AA	AA	AA	AA	AA	AA	AA	AA	AA	AA	AA	AA	AA	AA	AA	AB	AA	AB	AB	AA	AB	AA	AA	AA	AB	BB	AB	AB	AA	AA	AB	AA	AB	BB	AB	AB	AB	AA
rs13478518	5	125334324	AA	AA	AA	AA	AA	AA	AA	AA	AA	AA	AA	AA	AA	AA	AA	AB	AA	AA	AB	AB	AA	AA	AA	AB	AB	AA	AB	AB	AA	AB	BB	AB	AB	AB	AA	AB	AB	BB	BB	AB	BB	AB	AB	AB	BB	AB	BB
rs13478527	5	126818001	BB	BB	BB	BB	BB	BB	BB	BB	BB	BB	BB	BB	BB	BB	BB	BB	BB	BB	AB	AB	BB	BB	BB	AB	AB	BB	AB	AB	BB	BB	AB	BB	BB	AB	BB	BB	BB	AB	AB	AB	AA	AB	BB	BB	BB	BB	AB
gnf05.124.386	5	127936509	AA	AA	AA	AA	AA	AA	AA	AA	AA	AA	AA	AA	AA	AA	AA	AA	AA	AA	AB	AB	AA	AA	AA	AB	AA	AA	AA	AA	AA	AA	AB	AA	AA	AA	AA	AB	AB	AB	AB	AA	AA	AA	AA	AB	AB	AB	AB
rs13478540	5	131766121	BB	BB	BB	BB	BB	BB	BB	BB	BB	BB	BB	BB	BB	BB	BB	BB	BB	BB	BB	BB	BB	BB	BB	BB	BB	BB	BB	BB	BB	BB	BB	BB	BB	BB	BB	BB	BB	BB	BB	BB	BB	BB	BB	BB	BB	BB	BB
rs13478546	5	133978719	AA	AA	AA	AA	AA	AA	AA	AA	AA	AA	AA	AA	AA	AA	AA	AA	AA	AA	AA	AA	AA	AA	AA	AA	AA	AA	AA	AA	AA	AA	AA	AA	AA	AA	AA	AA	AA	AA	AA	AA	AA	AA	AA	AA	AA	AA	AA
rs4225536	5	135836567	BB	BB	BB	BB	BB	BB	BB	BB	BB	BB	BB	BB	BB	BB	BB	BB	BB	BB	BB	BB	BB	BB	BB	BB	BB	BB	BB	BB	BB	BB	AB	AB	BB	BB	BB	BB	BB	BB	BB	BB	BB	BB	BB	BB	BB	BB	BB
rs6298689	5	137173297	BB	BB	BB	BB	BB	BB	BB	BB	BB	BB	BB	BB	BB	BB	BB	BB	BB	BB	BB	BB	BB	BB	BB	BB	BB	BB	BB	BB	BB	BB	AB	AB	BB	BB	BB	AB	AA	AB	AB	BB	BB	BB	BB	AB	AB	AB	AB
rs3656197	5	139206611	AB	BB	AB	AB	BB	BB	BB	BB	BB	BB	AB	AA	AB	AB	BB	BB	AB	AB	AB	BB	AB	AB	AB	BB	AB	AB	AB	BB	BB	AB	BB	BB	BB	BB	BB	BB	BB	BB	BB	BB	BB	BB	BB	BB	BB	BB	BB
rs13478574	5	141567331	AA	AA	AA	AA	AA	AA	AA	AA	AA	AA	AA	AA	AA	AA	AA	AA	AA	AA	AA	AB	AA	AA	AA	AA	AA	AA	AA	AA	AA	AA	AB	AA	AB	AA	AA	AA	AA	AA	AA	AA	AA	AA	AA	AA	AA	AA	AA
rs3718776	5	147051702	AB	AB	AA	AB	BB	AA	AB	BB	BB	BB	AB	AA	AA	BB	AB	AB	AA	BB	AB	AB	AB	BB	AA	BB	AB	AB	AB	BB	BB	AA	AB	AB	AB	AA	AA	AB	AB	BB	BB	AA	AB	AB	AA	AB	BB	AB	BB
rs3661828	6	3167392	AA	AA	AA	AA	AA	AA	AA	AA	AA	AA	AA	AA	AA	AA	AA	AA	AA	AA	AA	AB	AA	AA	AA	AA	AB	AA	AB	AA	AA	AA	AA	AB	AA	AA	AA	AA	AA	AA	AA	AA	AA	AA	AA	AA	AA	AA	AA
rs13478602	6	3547547	BB	BB	BB	BB	BB	BB	BB	BB	BB	BB	BB	BB	BB	BB	BB	BB	BB	BB	BB	BB	BB	BB	BB	BB	BB	BB	BB	BB	BB	BB	BB	BB	BB	BB	BB	AB	AA	BB	BB	BB	BB	BB	AB	BB	AB	BB	BB
rs6172481	6	4362632	AA	AA	AA	AA	AA	AA	AA	AA	AA	AA	AA	AA	AA	AB	AA	AA	AA	AA	AA	AB	AB	AA	AA	AA	AB	AA	AB	AA	AA	AA	AA	AB	AA	AA	AB	AB	AA	AB	AB	AA	AB	AB	AA	BB	AB	AB	AB
rs3699833	6	6161470	AA	AA	AA	AA	AA	AA	AA	AA	AA	AA	AA	AA	AA	AB	AA	AA	AA	AA	AA	AB	AB	AA	AA	AA	AA	AA	AA	AA	AA	AB	AA	AA	AA	AA	AA	AA	AA	AA	AA	AA	AA	AA	AA	AA	AA	AA	AA
rs13478617	6	7747436	AA	AA	AA	AA	AA	AA	AA	AA	AA	AA	AA	AA	AA	AA	AA	AA	AA	AA	AA	AA	AA	AA	AA	AA	AA	AA	AA	AA	AA	AA	AA	AA	AA	AA	AA	AB	BB	AA	AA	AA	AA	AA	AB	AA	AB	AA	AA
rs13478621	6	8907544	BB	BB	BB	BB	BB	BB	BB	BB	BB	BB	BB	BB	BB	BB	BB	BB	BB	BB	BB	BB	BB	BB	BB	AB	AB	AB	AB	AB	BB	BB	BB	BB	AB	BB	AB	AB	BB	AB	AB	BB	AB	AB	BB	AA	AB	BB	AB
rs13478626	6	9890882	AA	AA	AA	AA	AA	AA	AA	AA	AA	AA	AA	AA	AA	AA	AA	AA	AA	AA	AA	BB	AA	AA	AA	AB	AB	AA	AB	AA	AA	AA	AB	AB	AA	BB	AB	AB	BB	AB	AB	BB	AB	AB	BB	AA	AB	BB	AB
rs13478631	6	11055603	BB	BB	BB	BB	BB	BB	BB	BB	BB	BB	BB	BB	BB	AB	BB	BB	BB	BB	BB	AA	AB	AB	BB	AA	AA	AB	AA	AB	BB	AB	AB	AB	AB	AA	AA	AA	AA	AA	AA	AA	AA	AA	AA	AA	AA	AA	AA
rs3678711	6	14045168	NN	BB	BB	BB	BB	BB	BB	BB	BB	BB	BB	BB	BB	BB	BB	BB	BB	BB	BB	BB	BB	BB	BB	AB	BB	BB	BB	BB	BB	AB	BB	BB	BB	AA	AA	AA	AA	AA	AA	AA	AA	AA	AA	AA	AA	AA	AA
rs13478641	6	15816033	BB	BB	BB	BB	BB	BB	BB	BB	BB	BB	BB	BB	BB	BB	BB	BB	BB	BB	BB	AB	BB	BB	BB	AA	AB	AB	AB	AB	BB	BB	BB	BB	AB	BB	BB	AB	AA	BB	BB	BB	BB	BB	AB	BB	AB	BB	BB
rs3655269	6	17715100	BB	BB	BB	BB	BB	BB	BB	BB	BB	BB	BB	BB	BB	BB	BB	BB	BB	BB	BB	BB	BB	BB	BB	BB	AB	AB	AB	AB	BB	BB	AB	BB	AB	BB	BB	AB	AA	BB	BB	BB	BB	BB	AB	BB	AB	BB	BB
rs13478649	6	18376687	AA	AA	AA	AA	AA	AA	AA	AA	AA	AA	AA	AA	AA	AB	AA	NN	AA	AA	AA	AB	AB	AB	AA	BB	BB	AB	BB	AB	AA	AB	AB	AB	AB	AB	AB	AB	BB	AA	AB	BB	AB	AB	BB	AA	AB	BB	AB
rs13478656	6	21755667	BB	BB	BB	BB	BB	BB	BB	BB	BB	BB	BB	BB	BB	BB	BB	BB	BB	BB	BB	BB	BB	BB	BB	BB	BB	BB	BB	BB	BB	BB	BB	BB	BB	BB	BB	BB	BB	BB	BB	BB	BB	BB	BB	BB	BB	BB	BB
rs3684494	6	24248321	BB	BB	BB	BB	BB	BB	BB	BB	BB	BB	BB	BB	BB	BB	BB	BB	BB	BB	BB	BB	BB	BB	BB	AB	AB	AB	AB	AB	BB	BB	BB	BB	AB	AB	AA	AB	BB	AA	AB	AA	AA	AA	AB	AA	AB	AA	AB
rs3671709	6	25646449	BB	BB	BB	BB	BB	BB	BB	BB	BB	BB	BB	BB	BB	BB	BB	BB	BB	BB	BB	AB	BB	BB	BB	BB	AA	AB	AA	AB	BB	BB	BB	AB	AB	BB	BB	BB	BB	BB	BB	BB	BB	BB	BB	BB	BB	BB	BB
gnf06.026.418	6	29269458	AA	AA	AA	AA	AA	AA	AA	AA	AA	AA	AA	AA	AA	AA	AA	AA	AA	AA	AA	AB	AA	AA	AA	BB	AA	AB	AA	AB	AA	AB	AA	AA	AA	AB	AB	AB	BB	AA	AA	BB	AB	AB	AB	AA	AB	BB	AA
rs13478697	6	32730020	BB	AB	BB	BB	BB	BB	BB	BB	BB	BB	AB	BB	BB	AB	BB	BB	AB	AB	AB	BB	AB	AB	BB	AB	AB	BB	AB	BB	BB	AB	BB	BB	BB	AB	AB	AB	BB	AA	AB	BB	AB	AB	BB	AA	AB	BB	AB
rs3704635	6	36040358	BB	BB	BB	BB	BB	BB	BB	BB	BB	BB	BB	BB	BB	BB	BB	BB	BB	BB	BB	AB	BB	BB	BB	AB	AB	AB	AB	AB	BB	BB	BB	AB	BB	AB	AA	BB	BB	BB	BB	AA	AB	AB	BB	BB	BB	AA	BB
rs6330932	6	37461200	AA	AA	AA	AA	AA	AA	AA	AA	AA	AA	AA	AA	AA	AA	AA	AA	AA	AA	AA	AB	AA	AA	AA	BB	AA	AA	AA	AA	AA	AA	AA	AA	AB	AA	AA	AB	BB	AA	AA	AA	AA	AA	AB	AA	AB	AA	AA
rs13478719	6	38474383	AA	AA	AA	AA	AA	AA	AA	AA	AA	AA	AA	AA	AA	AA	AA	AA	AA	AA	AA	BB	AA	AA	AA	AB	BB	AA	BB	AA	AA	AB	AA	AB	AB	AB	BB	AA	AA	AA	AA	BB	AB	AB	AA	AA	AA	BB	AA
rs13478727	6	43778689	AA	AA	AA	AA	AA	AA	AA	AA	AA	AA	AA	AA	AA	AA	AA	AA	AA	AA	AA	BB	AA	AA	AA	AA	BB	AB	BB	AB	AA	AA	AA	AB	AB	BB	BB	AB	AA	BB	BB	BB	BB	BB	AB	BB	AB	BB	BB
rs6238771	6	45234635	AA	AA	AA	AA	AA	AA	AA	AA	AA	AA	AA	AA	AA	AA	AA	AB	AA	AA	AA	AB	AA	AA	AA	AB	AB	AB	AB	AA	AA	AB	AA	AB	AA	BB	BB	BB	BB	BB	BB	BB	BB	BB	BB	BB	BB	BB	BB
rs13478732	6	45420260	BB	BB	BB	BB	BB	BB	BB	BB	BB	BB	BB	BB	BB	BB	BB	BB	BB	BB	BB	BB	BB	BB	BB	AB	BB	AB	BB	BB	BB	BB	BB	BB	BB	BB	BB	BB	BB	BB	AB	BB	BB	AB	AB	BB	BB	AB	AB
rs4139698	6	49813889	BB	BB	BB	BB	BB	BB	BB	BB	BB	BB	BB	BB	BB	BB	BB	BB	BB	BB	BB	BB	BB	BB	BB	AB	BB	BB	BB	BB	BB	AB	BB	BB	BB	BB	BB	BB	BB	BB	BB	BB	BB	BB	BB	BB	BB	BB	BB
rs13478753	6	51145321	BB	BB	BB	BB	BB	BB	BB	BB	BB	BB	BB	BB	BB	BB	BB	BB	BB	BB	BB	AB	BB	BB	BB	BB	AA	BB	AA	AB	BB	BB	BB	AB	BB	AA	AA	AA	AA	AA	AA	AA	AA	AA	AA	AA	AA	AA	AA
rs13478761	6	53702681	BB	BB	BB	BB	BB	BB	BB	BB	BB	BB	BB	BB	BB	BB	BB	BB	BB	BB	BB	BB	BB	BB	BB	AB	BB	BB	BB	BB	BB	BB	BB	BB	BB	BB	BB	BB	BB	BB	BB	BB	BB	BB	BB	BB	BB	BB	BB
rs13478780	6	59609561	AA	AA	AA	AA	AA	AA	AA	AA	AA	AA	AA	AA	AA	AA	AA	AA	AA	AA	AA	AB	AA	AA	AA	AB	AA	AB	AA	AA	AA	AA	AA	AA	AA	BB	BB	AB	AB	BB	AB	BB	AB	BB	AA	BB	AB	BB	AA
rs6378343	6	63916748	BB	BB	BB	BB	BB	BB	BB	BB	BB	BB	BB	BB	BB	BB	BB	BB	BB	BB	BB	AB	BB	BB	BB	AB	BB	BB	AB	BB	BB	AB	BB	AB	BB	BB	BB	AB	AA	BB	BB	BB	AB	AA	AB	AB	AB	AB	BB
rs13478801	6	65211036	AA	AA	AA	AA	AA	AA	AA	AA	AA	AA	AA	AA	AA	AA	AA	AA	AA	AA	AA	AB	AA	AA	AA	AA	AA	AB	AB	AA	AA	AA	AA	AB	AA	AA	AA	AA	AA	AA	AA	AA	AA	AB	AA	AB	AA	AA	AA
rs6353425	6	67548202	AA	AA	AA	AA	AA	AA	AA	AA	AA	AA	AA	AA	AA	AA	AA	AA	AA	AA	AA	AA	AA	AA	AA	AA	AA	AA	AA	AA	AA	AA	AA	AA	AA	AA	AA	AA	AA	AA	AA	AA	AA	AA	AA	AA	AA	AA	AA
rs6195266	6	69590221	BB	BB	BB	BB	BB	BB	BB	BB	BB	BB	BB	BB	BB	BB	BB	BB	BB	BB	BB	BB	BB	BB	BB	BB	BB	AB	BB	BB	BB	BB	BB	BB	BB	BB	BB	BB	BB	BB	BB	BB	BB	BB	BB	BB	BB	BB	BB
mhcCD8b4	6	71532444	AA	AA	AA	AA	AA	AA	AA	AA	AA	AA	AA	AA	AA	AA	AA	AA	AA	AA	AA	AB	AA	AA	AA	AA	AB	AA	AB	AB	AA	AA	AA	AB	AA	AA	AA	AA	AA	AB	AB	AA	AB	AB	AA	AB	AA	AA	AB
rs13478819	6	73538842	BB	BB	BB	BB	BB	BB	BB	BB	BB	BB	BB	BB	BB	BB	BB	BB	BB	BB	BB	BB	BB	BB	BB	BB	BB	BB	BB	BB	BB	BB	BB	BB	BB	BB	BB	BB	BB	BB	BB	BB	BB	BB	BB	BB	BB	BB	BB
rs3672029	6	75631345	AA	AA	AA	AA	AA	AA	AA	AA	AA	AA	AA	AA	AA	AA	AA	AA	AA	AA	AA	BB	AA	AA	AA	BB	AB	AA	AB	AB	AA	AB	AA	AB	AB	AB	AA	AA	AA	AB	BB	AA	AB	AB	AB	AB	AA	AA	BB
rs3699367	6	76679118	BB	BB	BB	BB	BB	BB	BB	BB	BB	BB	BB	BB	BB	BB	BB	BB	BB	BB	BB	AB	BB	BB	BB	BB	BB	AB	BB	BB	BB	BB	BB	BB	AB	BB	BB	AB	AA	BB	BB	BB	AB	AB	AB	BB	AB	AB	BB
rs13478841	6	78477103	BB	BB	BB	BB	BB	BB	BB	BB	BB	BB	BB	BB	BB	BB	BB	BB	BB	BB	BB	AB	BB	BB	BB	AA	BB	BB	BB	BB	BB	BB	BB	BB	AB	BB	BB	AB	AA	AB	AB	BB	AB	AB	AB	AB	AB	BB	AB
rs6377140	6	80032286	BB	BB	BB	BB	BB	BB	BB	BB	BB	BB	BB	BB	BB	BB	BB	BB	BB	BB	BB	BB	BB	BB	BB	BB	BB	BB	BB	BB	BB	BB	BB	BB	BB	AA	AA	AA	AA	AA	AA	AA	AB	AB	AA	AA	AA	AB	AA
rs6181382	6	81674296	BB	BB	BB	BB	BB	BB	BB	BB	BB	BB	BB	BB	BB	BB	BB	BB	BB	BB	BB	BB	BB	BB	BB	AB	BB	AB	BB	BB	BB	AB	BB	BB	BB	AA	AA	AB	BB	AA	AA	AA	AB	BB	AB	AB	AB	AB	AA
CEL-6_83434907	6	83434907	BB	BB	BB	BB	BB	BB	BB	BB	BB	BB	BB	BB	BB	BB	BB	BB	BB	BB	BB	AA	BB	BB	BB	AA	BB	AB	BB	BB	BB	AB	BB	BB	AB	AA	AA	AA	AA	AB	AB	AA	AB	AA	AA	AA	AA	AA	AB
rs13459097	6	85136988	BB	BB	BB	BB	BB	BB	BB	BB	BB	BB	BB	BB	BB	BB	BB	BB	BB	BB	BB	BB	BB	BB	BB	BB	AB	BB	AB	AB	BB	BB	BB	AB	BB	BB	BB	BB	BB	BB	BB	BB	BB	BB	BB	BB	BB	BB	BB
CEL-6_86289708	6	86289708	BB	BB	BB	BB	BB	BB	BB	BB	BB	BB	BB	BB	BB	BB	BB	BB	BB	BB	BB	AA	BB	BB	BB	AA	AB	AB	AB	AB	BB	AA	BB	AB	AB	AB	AA	AA	AA	AA	AA	AB	AA	AA	AA	AA	AA	AA	AA
rs13478882	6	90003224	AA	AA	AA	AA	AA	AA	AB	AA	AA	AA	AA	AA	AA	AB	AA	AB	AA	AA	AA	AA	AA	AA	AA	AA	AB	AA	AB	AB	AA	AA	AA	AB	AA	AA	AA	AA	AA	AA	AA	AA	AA	AA	AA	AA	AA	AA	AA
rs13478891	6	92361613	BB	BB	BB	BB	BB	BB	BB	BB	BB	BB	BB	BB	BB	BB	BB	BB	BB	BB	BB	AB	BB	BB	BB	BB	BB	AB	AB	BB	BB	AB	BB	AB	BB	BB	BB	AB	AA	BB	BB	BB	BB	BB	AB	BB	AB	BB	BB
rs6285738	6	93892091	BB	BB	BB	BB	BB	BB	BB	BB	BB	BB	BB	BB	BB	BB	BB	BB	BB	BB	BB	AA	BB	BB	BB	BB	BB	BB	BB	BB	BB	BB	BB	BB	BB	BB	BB	BB	BB	BB	BB	BB	BB	BB	BB	BB	BB	BB	BB
rs6239023	6	94413050	AA	AA	AA	AA	AA	AA	AA	AA	AA	AA	AA	AA	AA	AA	AA	AA	AA	AA	AA	AB	AA	AA	AA	BB	AA	AB	AB	AA	AA	BB	AA	AB	AB	BB	BB	BB	BB	BB	BB	BB	BB	BB	BB	BB	BB	BB	BB
rs6349084	6	97121415	BB	BB	BB	BB	BB	BB	BB	BB	BB	BB	BB	BB	BB	BB	BB	BB	BB	BB	BB	BB	BB	BB	BB	AB	BB	BB	AB	BB	BB	BB	BB	AB	BB	BB	BB	BB	BB	BB	AB	BB	AB	AB	AB	BB	BB	AB	AB
rs13478919	6	98304818	BB	BB	BB	BB	BB	BB	BB	BB	BB	BB	BB	BB	BB	BB	BB	BB	BB	BB	BB	AB	BB	BB	BB	AB	BB	AB	BB	BB	BB	AB	BB	BB	AB	BB	BB	AB	AA	AB	AA	BB	AA	AA	AB	AB	AB	AB	AA
rs4138572	6	98790763	AA	AA	AA	AA	AA	AA	AA	AA	AA	AA	AA	AA	AA	AA	AA	AA	AA	AA	AA	AB	AA	AA	AA	AA	AB	AA	AB	AB	AA	AB	AA	AB	AA	AA	AA	AA	AA	AA	AA	AA	AA	AB	AA	AB	AA	AA	AA
rs3718735	6	101508462	BB	BB	BB	BB	BB	BB	BB	BB	BB	BB	BB	BB	BB	BB	BB	BB	BB	BB	BB	AB	BB	BB	BB	AB	BB	AB	AB	BB	BB	AB	BB	AB	BB	BB	BB	BB	BB	BB	BB	BB	BB	BB	BB	BB	BB	BB	BB
rs13478943	6	104128964	AA	AA	AA	AA	AA	AA	AA	AA	AA	AA	AA	AA	AA	AA	AA	AA	AA	AA	AA	BB	AA	AA	AA	AB	AB	AA	AB	AB	AA	AA	AA	AB	AB	AB	AA	AB	BB	AB	BB	AB	AB	AB	AB	AB	AB	AA	BB
rs6208251	6	105270851	BB	BB	BB	BB	BB	BB	BB	BB	BB	BB	BB	BB	BB	BB	BB	BB	BB	BB	BB	AB	BB	BB	BB	AB	BB	BB	AB	BB	BB	AB	BB	AB	AB	AB	BB	AB	AA	BB	BB	AB	BB	AB	BB	AB	AB	BB	BB
rs13478952	6	106695156	BB	BB	BB	BB	BB	BB	BB	BB	BB	BB	BB	BB	BB	BB	BB	BB	BB	BB	BB	BB	BB	BB	BB	BB	BB	BB	BB	BB	BB	BB	BB	BB	BB	AB	BB	BB	BB	AB	AB	AB	AB	AB	BB	AB	BB	BB	AB
rs3670475	6	110397055	NN	AA	AA	AA	AA	AA	AA	AA	AA	AA	AA	AA	AA	AA	AA	NN	AA	AA	AA	AA	AA	AA	AA	AA	AA	AA	AA	AA	AA	AA	AA	AA	AA	AA	AA	AA	AA	AA	AA	AA	AA	AA	AA	AA	AA	AA	AA
rs13478971	6	111749805	AA	AA	AA	AA	AA	AA	AA	AA	AA	AA	AA	AA	AA	AA	AA	AA	AA	AA	AA	AA	AA	AA	AA	AA	AA	AA	AA	AA	AA	AA	AA	AA	AA	AA	AA	AA	AA	AA	AA	AA	AA	AA	AA	AA	AA	AA	AA
rs13478977	6	113036388	BB	BB	BB	BB	BB	BB	BB	BB	BB	BB	BB	BB	BB	BB	BB	BB	BB	BB	BB	AB	BB	BB	BB	AA	AA	AB	BB	AA	AB	AB	BB	BB	AA	BB	BB	AB	AB	AB	AA	BB	AA	AB	AB	BB	AB	AB	AA
rs6393943	6	114932370	AA	AA	AA	AA	AA	AA	AA	AA	AA	AA	AA	AA	AA	AA	AA	AA	AA	AA	AA	AA	AA	AA	AA	AA	AA	AA	AA	AA	AA	AA	AA	AA	AA	AA	AA	AB	AB	AA	AA	AA	AA	AA	AA	AA	AB	AA	AA
rs6401637	6	116477552	BB	BB	BB	BB	BB	BB	BB	BB	BB	BB	BB	BB	BB	BB	BB	BB	BB	BB	BB	AB	BB	BB	BB	AA	AB	BB	BB	AB	BB	AB	BB	BB	AB	AA	AA	AB	AB	AB	AB	AA	BB	AB	AA	AA	AB	AB	AB
mCV23042866	6	117147180	AA	AA	AA	AA	AA	AA	AA	AA	AA	AA	AA	AA	AA	AA	AA	AA	AA	AA	AA	AA	AA	AA	AA	AA	AA	AA	AA	AA	AA	AA	AA	AA	AA	AB	BB	AB	AB	AB	AB	AB	AA	AA	BB	AB	AB	AB	AB
rs13479006	6	121702158	BB	BB	BB	BB	BB	BB	BB	BB	BB	BB	BB	BB	BB	BB	BB	BB	BB	BB	BB	AA	BB	BB	BB	AA	BB	BB	BB	BB	BB	BB	BB	BB	AB	AB	AA	AA	AA	AA	AA	AB	AA	AA	AA	AA	AA	AA	AA
rs13479014	6	125666374	AA	AA	AA	AA	AA	AA	AA	AA	AA	AA	AA	AA	AA	AA	AA	AA	AA	AA	AA	AB	AA	AA	AA	AB	AB	AB	AA	AB	AB	AB	AB	AB	AB	AA	AA	AA	AA	AA	AB	AA	AB	AB	AB	AA	AA	AA	AB
rs6200835	6	126340874	AA	AA	AA	AA	AA	AA	AA	AA	AA	AA	AA	AA	AA	AA	AA	AA	AA	AA	AA	BB	AA	AA	AA	AB	AB	AA	AA	AB	AA	AA	AA	AA	AB	AA	AA	AA	AA	AA	AB	AA	AA	AA	AB	AA	AA	AA	AB
rs6389420	6	127676012	AA	AA	AA	AA	AA	AA	AA	AA	AA	AA	AA	AA	AA	AA	AA	AA	AA	AA	AA	AB	AA	AA	AA	BB	BB	AB	AA	BB	AB	AB	AB	AB	BB	BB	BB	BB	BB	BB	AB	BB	BB	BB	AB	BB	BB	BB	AB
rs3681620	6	128654310	BB	BB	BB	BB	BB	BB	BB	BB	BB	BB	BB	BB	BB	BB	BB	BB	BB	BB	BB	AA	BB	BB	BB	AA	BB	BB	BB	BB	BB	BB	BB	AB	AB	BB	BB	BB	BB	BB	AB	BB	AB	AB	AB	BB	BB	BB	AB
CEL-6_130920075	6	130920075	AA	AA	AA	AA	AA	AA	AA	AA	AA	AA	AA	AA	AA	AA	AA	AA	AA	AA	AA	AB	AA	AA	AA	AA	AB	AA	AA	AB	AA	AA	AA	AA	AA	AA	AA	AA	AA	AA	AB	AA	AA	AB	AB	AB	AA	AB	AB
rs3722480	6	131616421	BB	BB	BB	BB	BB	BB	BB	BB	BB	BB	BB	BB	BB	BB	BB	BB	BB	BB	BB	AA	BB	BB	BB	AB	AA	AB	BB	AB	BB	AB	BB	AB	AB	AA	AA	AA	AA	AA	AA	AA	AA	AB	AA	AB	AA	AB	AA
rs6339546	6	134019679	AA	AA	AA	AA	AA	AA	AA	AA	AA	AA	AA	AA	AA	AA	AA	AA	AA	AA	AA	AB	AA	AA	AA	AB	AA	AA	AA	AA	AA	AA	AA	AA	AB	AA	AA	AA	AA	AA	AA	AA	AA	AA	AA	AA	AA	AA	AA
rs13479053	6	134303922	BB	BB	BB	BB	BB	BB	BB	BB	BB	BB	BB	BB	BB	BB	BB	BB	BB	BB	BB	AA	BB	BB	BB	AB	AB	AB	BB	BB	BB	AB	BB	AB	AB	AA	AA	AA	AA	AA	AB	AA	AA	AA	AB	AA	AA	AA	AB
rs13479063	6	136451163	AA	AA	AA	AA	AA	AA	AA	AA	AA	AA	AA	AA	AA	AA	AA	AA	AA	AA	AA	BB	AA	AA	AA	BB	BB	AA	AA	BB	AB	AA	AB	AB	BB	AB	AB	AB	AA	BB	AB	AB	BB	BB	AB	AB	AB	BB	AB
rs13479071	6	138359897	BB	BB	BB	BB	BB	BB	BB	BB	BB	BB	BB	BB	BB	BB	BB	BB	BB	BB	BB	AB	BB	BB	BB	AA	BB	AB	AB	AB	AB	AB	AB	AB	AA	AB	AB	AB	AA	BB	BB	AB	BB	AB	BB	AA	AB	AB	BB
rs3672808	6	139965472	AA	AB	AB	AB	AA	AB	AB	AA	AA	AA	AA	AA	AA	AA	AB	BB	AB	AA	AA	BB	AB	AB	AA	BB	BB	AB	AB	BB	AA	AB	AB	BB	BB	BB	BB	BB	BB	BB	BB	BB	BB	BB	BB	BB	BB	BB	BB
rs3658783	6	144465978	BB	AB	AB	AB	AB	AB	AB	BB	BB	BB	BB	BB	AB	AB	AB	AA	AB	BB	BB	AB	AB	AB	AB	AA	AA	BB	BB	AA	BB	BB	AB	AB	AB	BB	BB	BB	BB	BB	BB	BB	BB	BB	BB	BB	BB	BB	BB
rs6265387	6	147380171	BB	BB	BB	BB	BB	BB	BB	BB	BB	BB	BB	BB	BB	BB	BB	BB	BB	BB	BB	BB	BB	BB	BB	BB	BB	BB	BB	BB	BB	BB	BB	BB	BB	BB	BB	BB	BB	BB	BB	BB	BB	BB	BB	BB	BB	BB	BB
rs3711088	6	148456534	BB	BB	BB	BB	BB	BB	BB	BB	BB	BB	BB	BB	BB	BB	BB	BB	BB	BB	BB	BB	BB	BB	BB	AB	BB	BB	BB	BB	BB	AB	BB	BB	BB	AB	AB	AB	AA	BB	AB	AB	AB	AB	AB	AB	AB	BB	AB
gnf06.149.306	6	149418695	BB	BB	BB	BB	BB	BB	BB	BB	BB	BB	BB	BB	BB	BB	BB	BB	BB	BB	BB	BB	BB	BB	BB	BB	BB	BB	BB	BB	BB	BB	BB	BB	BB	BB	BB	BB	BB	BB	BB	BB	BB	BB	BB	BB	BB	BB	BB
mCV23738426	7	4906617	BB	BB	BB	BB	BB	BB	BB	BB	BB	BB	BB	BB	BB	BB	BB	BB	BB	BB	BB	BB	BB	BB	BB	BB	BB	BB	BB	BB	BB	BB	BB	BB	BB	AB	AA	AA	AA	AA	AA	AB	AA	AA	AA	AA	AA	AA	AA
CEL-7_5627457	7	5627457	AB	AA	AB	AB	AA	AA	AA	AA	AB	AA	AB	AB	AB	AA	AA	AA	AA	AA	AB	AA	AA	AA	AA	AB	AA	AA	AA	AB	BB	AA	AA	AA	AB	AA	AA	AA	AB	AA	AA	AA	AB	AB	AA	AB	AA	AA	AB
rs13479139	7	8241486	BB	AA	AB	AB	AB	AB	AA	AA	BB	AB	BB	AB	AB	AA	AA	AA	AB	AA	AB	AA	AA	AA	AA	AB	BB	AB	BB	AB	BB	AB	AA	AB	BB	AB	BB	AB	AB	BB	BB	AB	BB	BB	AB	BB	AB	BB	AB
rs6361142	7	9296425	BB	BB	BB	BB	BB	BB	BB	BB	BB	BB	BB	BB	BB	BB	BB	BB	BB	BB	BB	BB	BB	BB	BB	BB	BB	BB	BB	AB	BB	BB	BB	BB	BB	AB	AA	AA	AA	AA	AA	AB	AA	AA	AA	AA	AA	AA	AA
rs3689218	7	10546409	AA	BB	AB	AB	AB	AB	BB	AB	AA	AA	AA	AB	AB	BB	BB	BB	AB	BB	AB	AB	BB	AB	BB	AB	AA	AB	AA	BB	AA	AB	BB	AB	AA	AA	AA	AA	AA	AA	AA	AA	AA	AA	AA	AA	AA	AA	AA
gnf07.013.809	7	10926083	AB	BB	BB	BB	AB	AB	BB	AB	AB	AA	AB	BB	BB	BB	BB	BB	AB	BB	BB	BB	BB	AB	BB	BB	AA	AB	AA	AB	BB	BB	BB	AB	BB	AA	AA	AA	AB	AA	AA	AA	AA	AA	AA	AA	AA	AA	AA
CEL-7_17114061	7	17114061	BB	BB	BB	BB	BB	BB	BB	BB	BB	BB	BB	BB	BB	BB	BB	BB	BB	BB	BB	BB	BB	BB	BB	BB	BB	BB	BB	BB	BB	AB	BB	BB	BB	BB	BB	BB	BB	BB	BB	BB	BB	BB	BB	BB	BB	BB	BB
rs4226499	7	17800749	AB	BB	BB	BB	AB	AB	BB	AA	AB	AA	AB	BB	BB	BB	BB	BB	AB	BB	BB	BB	BB	BB	NN	BB	AA	AB	AA	BB	AB	BB	BB	BB	AB	BB	BB	BB	BB	BB	BB	BB	BB	BB	BB	BB	BB	BB	BB
rs4226520	7	18758740	AA	AA	AA	AA	AA	AA	AA	AA	AA	AA	AA	AA	AA	AA	AA	AA	AA	AA	AA	AB	AA	AA	AA	AA	AA	AA	AA	AA	AA	AA	AA	AA	AA	AA	AA	AA	AA	AA	AA	AA	AA	AA	AA	AA	AA	AA	AA
rs3147860	7	19496283	BB	AA	BB	AB	AB	AB	AA	BB	BB	BB	BB	AB	AB	AA	AA	AA	AB	AA	AB	AA	AA	AA	AB	AB	AB	AA	AB	AB	BB	AB	AA	AA	BB	BB	AB	AB	BB	AB	AB	BB	BB	BB	AB	BB	AB	AB	BB
rs3719311	7	22647606	AB	BB	AA	AB	AB	AB	BB	BB	AA	BB	AB	AB	AB	BB	BB	BB	BB	BB	AB	AB	BB	BB	BB	AB	BB	BB	BB	BB	AB	AB	BB	AB	AB	BB	BB	BB	BB	BB	BB	BB	BB	BB	BB	BB	BB	BB	BB
rs6239372	7	23113384	BB	BB	BB	BB	BB	BB	BB	BB	BB	BB	BB	BB	BB	BB	BB	BB	BB	BB	BB	BB	BB	BB	BB	BB	BB	BB	BB	BB	BB	AB	BB	BB	BB	BB	BB	AB	AB	BB	BB	BB	AB	AA	AB	AA	BB	AB	AA
gnf07.032.889	7	28379711	AB	BB	AA	AB	AB	AB	BB	BB	AB	BB	AB	AB	AB	BB	BB	BB	BB	BB	AB	BB	BB	BB	BB	AB	BB	AB	BB	BB	AB	BB	BB	BB	AB	BB	AB	AB	BB	AB	AB	BB	BB	BB	AA	BB	AB	AB	BB
rs3719256	7	31933809	AB	BB	AA	AB	AB	AB	BB	BB	AB	BB	AB	AB	AB	BB	BB	BB	BB	BB	AB	BB	BB	BB	BB	AB	BB	AB	BB	BB	AB	BB	AB	BB	AB	AA	AA	AA	AA	AA	AA	AA	AA	AA	AA	AA	AA	AA	AA
rs8255275	7	33574760	AA	AA	AA	AA	AA	AA	AA	AA	AA	AA	AA	AA	AA	AA	AA	AA	AA	AA	AA	AA	AA	AA	AA	AA	AB	AA	AB	AB	AA	AA	AA	AA	AA	AA	AA	AB	AA	AA	AA	AA	AB	AB	AA	AB	AA	AA	BB
rs8260975	7	33835314	AB	AA	BB	AB	AB	AB	AA	AA	AB	AA	AB	AB	AB	AA	AA	AA	AA	AA	AB	AA	AA	AA	AA	AB	AB	AB	AB	AB	AB	AB	AA	AB	AB	AA	AB	AB	AB	AB	AB	AA	AA	AB	BB	AB	AB	BB	AA
CEL-7_36725559	7	36725559	BB	BB	BB	BB	BB	BB	BB	BB	BB	BB	BB	BB	BB	BB	BB	BB	BB	BB	BB	BB	BB	BB	BB	BB	BB	BB	BB	BB	BB	BB	BB	AB	BB	BB	AB	AB	BB	AB	AB	BB	BB	BB	AA	BB	AB	AB	BB
rs3699938	7	38476481	BB	BB	BB	BB	BB	BB	BB	BB	BB	BB	BB	BB	BB	BB	BB	BB	BB	BB	BB	BB	BB	BB	BB	BB	BB	BB	BB	BB	BB	BB	BB	BB	BB	BB	BB	BB	BB	BB	BB	BB	BB	BB	BB	BB	BB	BB	BB
rs13479251	7	39863901	AB	BB	AA	AB	AB	AB	BB	BB	AB	AB	AB	AB	AB	BB	BB	BB	BB	BB	AB	BB	BB	BB	BB	AB	BB	AB	BB	BB	AB	BB	AB	BB	AB	AA	AB	BB	AA	AB	AB	AA	AA	AA	BB	AA	AB	AB	AB
rs3718641	7	41170581	AB	AA	BB	AB	AB	AB	AA	AA	AB	AB	AB	AB	AB	AA	AA	AA	AA	AA	AB	AA	AA	AA	AA	AB	AA	AB	AA	AA	AB	AB	AB	AA	AB	BB	BB	BB	BB	BB	BB	BB	BB	AB	BB	BB	BB	AB	BB
rs3663313	7	43718739	AA	AA	AA	AA	AA	AA	AA	AA	AA	AA	AA	AA	AA	AA	AA	AA	AA	AA	AA	AA	AA	AA	AA	AA	AB	AA	AB	AB	AA	AA	AA	AA	AA	BB	BB	BB	BB	BB	BB	BB	AB	AA	BB	AB	BB	AB	AB
mCV23672419	7	45173762	AA	AA	AA	AA	AA	AA	AA	AA	AA	AA	AA	AA	AA	AA	AA	AA	AA	AA	AA	BB	AA	AA	AA	AA	AA	AA	AA	AA	AA	AA	AA	AA	AA	AA	AA	AA	AA	AA	AA	AA	AA	AA	AA	AA	AA	AA	AA
rs13479277	7	46313106	BB	AA	BB	AB	AB	AB	AB	BB	AB	AB	BB	BB	AB	AA	AB	AA	AB	AA	AB	BB	AB	AA	AB	AB	AB	AB	AB	BB	BB	AB	AB	BB	BB	AA	AB	BB	AA	AB	AB	AA	AB	BB	BB	AB	AB	BB	BB
mCV23423763	7	47949709	AB	BB	BB	BB	BB	BB	AB	AA	BB	BB	AB	AB	BB	AB	AB	AB	AB	BB	BB	AA	AB	BB	AB	BB	BB	BB	BB	AB	AB	AB	BB	AB	AB	BB	BB	BB	BB	BB	BB	BB	AB	AB	BB	AB	BB	BB	AB
rs3679779	7	51392430	AB	BB	BB	BB	BB	BB	BB	AA	BB	BB	AB	AB	AB	BB	AB	BB	AB	BB	BB	BB	AB	BB	AB	BB	AB	BB	AB	AA	AB	AB	BB	AB	AB	BB	BB	BB	BB	BB	BB	BB	BB	BB	BB	BB	BB	BB	BB
rs3714908	7	51544526	AB	BB	BB	BB	BB	BB	BB	AA	BB	BB	AB	AB	AB	BB	AB	BB	AB	BB	BB	BB	AB	BB	AB	BB	AB	BB	AB	AA	AB	AB	BB	AB	AB	BB	BB	BB	BB	BB	BB	BB	BB	BB	BB	BB	BB	BB	BB
rs13479324	7	57878499	AB	BB	BB	BB	BB	BB	BB	AA	BB	BB	AB	AB	AB	BB	AB	BB	AB	AB	BB	AA	BB	BB	BB	BB	BB	BB	BB	BB	AB	BB	AB	BB	AB	BB	BB	BB	BB	BB	BB	BB	BB	AB	BB	AB	BB	AB	BB
rs3676254	7	59722158	AB	AA	AA	AA	AA	AA	AA	BB	AA	AA	AB	AB	AB	AA	AB	AA	AB	AB	AA	AA	AA	AA	AA	AB	AB	AA	AA	AB	AB	AB	AB	AA	AB	AA	AA	AA	AA	AA	AA	AA	AA	AB	AA	AB	AA	AB	AA
rs13479338	7	61105319	AA	AA	AA	AA	AA	AA	AA	AA	AA	AA	AA	AA	AA	AA	AA	AA	AA	AA	AA	AA	AA	AA	AA	AB	AA	AA	AA	AA	AA	AA	AA	AA	AA	AA	AA	AA	AA	AA	AA	AA	AA	AA	AA	AA	AA	AA	AA
rs13479347	7	63356038	AB	BB	AA	AB	AB	AB	AB	BB	AB	AB	BB	AB	BB	BB	BB	BB	BB	BB	AB	AA	AB	AB	BB	AB	AA	AB	AB	AB	BB	BB	BB	AA	AB	BB	BB	BB	BB	AB	BB	BB	AB	AA	BB	AB	BB	AB	AA
rs13479355	7	65348455	BB	AB	BB	AB	AB	AB	AB	BB	AB	BB	BB	BB	AB	AA	AB	AA	BB	AB	BB	BB	AB	BB	AA	AA	BB	AB	AB	AB	AB	AA	AB	BB	BB	BB	BB	BB	BB	BB	BB	BB	BB	BB	BB	BB	BB	BB	BB
rs13479358	7	66776784	AB	AB	AA	AA	AA	AA	AA	BB	AA	AB	BB	AB	AB	AA	AB	AA	BB	AB	AB	AA	AA	AB	AA	AA	AB	AA	AA	AB	AB	AB	AB	BB	AB	AA	AA	AA	AA	AA	AA	AA	AA	AB	AA	AB	AA	AB	AA
rs13479363	7	68228570	BB	BB	AB	AB	AB	AB	BB	BB	AB	BB	BB	BB	BB	BB	BB	BB	BB	BB	AB	BB	AB	AB	BB	BB	AB	AB	AB	BB	BB	BB	BB	BB	AB	AB	AB	AB	BB	AB	AB	BB	BB	BB	AA	BB	AB	AB	BB
rs6213614	7	69422276	AA	AA	AA	AA	AA	AA	AA	AA	AA	AA	AA	AA	AA	AA	AA	AA	AA	AA	AA	AA	AA	AA	AA	AB	BB	AB	AB	AB	AA	AB	AA	AB	AA	AA	AA	AA	AB	AB	AA	AA	AB	AB	AA	AB	AA	AA	BB
rs13479375	7	71406934	AB	AB	AB	AB	AB	AB	BB	AA	AB	AB	AA	AB	AB	BB	AB	BB	AA	AB	AA	AB	AB	AA	BB	AB	AB	AB	AB	BB	AB	AB	AB	AB	AA	AB	AB	AA	AB	AA	AA	BB	AB	AB	AB	AB	AB	AB	AB
rs13479385	7	74292260	AB	AB	AB	AB	AB	AB	AA	BB	AB	AB	BB	AB	AB	AA	AB	AA	BB	AB	BB	AA	AB	BB	AA	AA	AA	AA	AA	AA	AB	AA	AB	AA	BB	BB	BB	BB	AB	BB	BB	BB	BB	BB	BB	AB	BB	BB	BB
CEL-7_77850273	7	77850273	AB	BB	BB	BB	BB	BB	BB	BB	BB	BB	BB	BB	BB	BB	BB	BB	BB	BB	BB	BB	BB	BB	BB	AB	BB	BB	BB	BB	AB	BB	AB	BB	BB	AB	AB	BB	AB	BB	BB	AA	AB	AB	AB	AB	AA	AB	AB
rs4226783	7	80158909	BB	BB	AB	AB	AB	AB	BB	BB	AB	BB	AB	AB	BB	BB	BB	BB	BB	BB	AB	AA	AB	AB	BB	AB	AA	AB	AB	AB	BB	AB	BB	AA	AB	AA	AA	AA	AA	AA	AA	AA	AA	AA	AA	AA	AA	AA	AA
rs13479414	7	82727616	AA	AA	AB	AB	AB	AB	AA	AA	AB	AA	AB	AB	AA	AA	AA	AA	AA	AA	AB	AB	AB	AB	AA	AB	AB	AA	AA	AB	AA	AB	AA	BB	AB	AA	AA	AA	AA	AB	AB	AA	AB	AB	AA	AA	AA	AA	BB
rs3707067	7	85992410	AA	AA	AB	AB	AB	AB	AA	AA	AB	AA	AB	AB	AA	AA	AA	AA	AA	AA	AB	BB	AB	AB	AA	AA	BB	AB	AB	AB	AA	AB	AA	AB	AB	AB	AB	AB	AB	AA	AA	BB	AA	AA	AA	AA	AB	AA	AA
rs13479427	7	87305015	BB	BB	AB	AB	AB	AB	BB	BB	AB	BB	AB	AB	BB	BB	BB	BB	BB	BB	AB	AB	AB	AB	BB	AA	AB	AB	AB	BB	BB	BB	AA	AB	AA	AB	AB	AB	AB	AB	AB	AA	AB	AB	BB	BB	AB	BB	AA
rs3713052	7	89115174	BB	BB	BB	BB	BB	BB	BB	BB	BB	BB	BB	BB	BB	BB	BB	BB	BB	BB	BB	BB	BB	BB	BB	BB	AB	BB	BB	AB	BB	BB	BB	AB	BB	BB	BB	BB	BB	BB	BB	BB	BB	BB	BB	BB	BB	BB	BB
rs6357312	7	89751283	BB	BB	AB	AB	AB	AB	BB	BB	AB	BB	AB	AB	BB	BB	BB	BB	BB	BB	AB	AB	AB	AB	AB	AA	AA	AB	AB	AB	BB	AB	BB	AA	AB	AB	AB	AB	AB	AA	AA	BB	AA	AA	AB	AA	AB	AA	AA
rs3673653	7	94344049	BB	BB	BB	BB	BB	BB	BB	BB	BB	BB	BB	BB	BB	BB	BB	BB	BB	BB	BB	BB	BB	BB	BB	BB	BB	BB	BB	BB	BB	BB	BB	BB	BB	AB	AB	AB	AB	BB	BB	AA	BB	BB	AB	BB	AB	BB	BB
rs6386601	7	94870318	AA	AA	AB	AB	AB	AB	AA	AA	AB	AA	AB	AB	AA	AA	AA	AA	AA	AA	AB	BB	AB	AB	AB	BB	AB	AA	AA	AB	AA	AA	BB	BB	BB	AB	AA	AA	AB	AB	AB	AA	BB	BB	AA	BB	AA	AB	BB
rs13479455	7	96728523	AA	AA	AB	AB	AB	AB	AA	AA	AB	AA	AB	AB	AA	AA	AA	AA	AA	AA	AB	AB	AB	AB	AB	AB	AB	AB	AB	AA	AA	AB	BB	AB	BB	BB	BB	BB	BB	BB	BB	BB	AB	AB	BB	AB	BB	AB	BB
rs13479461	7	99220204	AA	AA	AB	AB	AB	AB	AA	AA	AB	AA	AB	AB	AA	AA	AA	AA	AA	AA	AB	BB	AB	AB	AA	AB	BB	AB	AB	AB	AA	AB	BB	AB	AB	AB	AB	AB	AB	AB	AB	AA	AA	AA	AB	AB	AB	AB	AA
rs6194926	7	101647757	AA	AA	AA	AA	AA	AA	AA	AA	AA	AA	AA	AA	AA	AA	AA	AA	AA	AA	AA	AA	AA	AA	AA	AA	AA	AA	AA	AA	AA	AA	AA	AA	AA	AA	AA	AA	AA	AA	AA	AA	AA	AA	AA	AA	AA	AA	AA
rs13479477	7	104533846	BB	BB	BB	BB	BB	BB	BB	BB	BB	BB	BB	BB	BB	BB	BB	BB	BB	BB	BB	BB	BB	BB	BB	BB	BB	BB	BB	BB	BB	BB	BB	BB	BB	BB	BB	BB	BB	BB	BB	BB	BB	BB	BB	BB	BB	BB	BB
rs3023159	7	106579694	BB	BB	BB	BB	BB	BB	BB	BB	BB	BB	BB	BB	BB	BB	BB	BB	BB	BB	BB	BB	BB	BB	BB	BB	BB	BB	BB	BB	BB	BB	BB	BB	BB	BB	BB	BB	BB	BB	BB	BB	BB	BB	BB	BB	BB	BB	BB
rs6275579	7	111285662	AA	AA	AA	AA	AA	AA	AA	AA	AA	AA	AA	AA	AA	AA	AA	AA	AA	AA	AA	AA	AA	AA	AA	AA	AA	AA	AA	AA	AA	AA	AA	AA	AA	AA	AA	AA	AA	AA	AA	AA	AA	AA	AA	AA	AA	AA	AA
rs13479506	7	112152410	AA	AA	AA	AA	AA	AA	AA	AA	AA	AA	AA	AA	AA	AA	AA	AA	AA	AA	AA	AA	AA	AA	AA	AA	AA	AA	AA	AA	AA	AA	AA	AA	AB	AA	AB	AB	AA	AB	AB	AA	AA	AA	AB	AA	AB	AA	AA
rs3682038	7	113814867	AA	AA	AA	AA	AA	AA	AA	AA	AA	AA	AA	AA	AA	AA	AA	AA	AA	AA	AA	AA	AA	AA	AA	AA	AA	AA	AA	AA	AA	AA	AA	AA	AA	AA	AA	AA	AA	AA	AA	AA	AA	AA	AA	AA	AA	AA	AA
rs13479517	7	115461663	BB	BB	BB	BB	BB	BB	BB	BB	BB	BB	BB	BB	BB	BB	BB	BB	BB	BB	BB	BB	BB	BB	BB	BB	BB	BB	BB	BB	BB	BB	BB	BB	AB	BB	BB	BB	BB	BB	BB	BB	BB	BB	BB	BB	BB	BB	BB
CEL-7_115892950	7	115892950	BB	BB	BB	BB	BB	BB	BB	BB	BB	BB	BB	BB	BB	BB	BB	BB	BB	BB	BB	BB	BB	BB	BB	BB	BB	BB	BB	BB	BB	BB	BB	BB	BB	BB	BB	BB	BB	BB	BB	BB	BB	BB	BB	BB	BB	BB	BB
rs13479535	7	119192048	AA	AA	AA	AA	AA	AA	AA	AA	AA	AA	AA	AA	AA	AA	AA	AA	AA	AA	AA	AA	AA	AA	AA	AA	AA	AA	AA	AA	AA	AA	AA	AA	AA	AA	AA	AA	AA	AA	AA	AA	AA	AA	AA	AA	AA	AA	AA
rs3716088	7	120621563	AA	AA	AA	AA	AA	AA	AA	AA	AA	AA	AA	AA	AA	AA	AA	AA	AA	AA	AA	AA	AA	AA	AA	AB	AA	AA	AA	AA	AA	AA	AA	AA	AA	BB	BB	BB	AB	AB	AB	BB	AA	AB	BB	AB	BB	AB	AA
rs13479553	7	124913079	BB	BB	BB	BB	BB	BB	BB	BB	BB	BB	BB	BB	BB	BB	BB	BB	BB	BB	BB	BB	BB	BB	BB	BB	BB	BB	BB	BB	BB	BB	BB	BB	BB	BB	BB	BB	BB	BB	BB	BB	BB	BB	BB	BB	AB	AB	AB
rs3711570	8	4193008	BB	BB	BB	BB	BB	BB	BB	BB	BB	BB	BB	BB	BB	BB	BB	BB	BB	BB	BB	AA	BB	BB	BB	BB	AB	AB	AA	BB	AB	BB	BB	AA	BB	BB	AB	BB	BB	AB	BB	BB	BB	AB	BB	BB	BB	BB	BB
rs6360601	8	6795642	BB	BB	BB	BB	BB	BB	BB	BB	BB	BB	BB	BB	BB	BB	BB	BB	BB	BB	BB	AA	BB	BB	BB	AB	AB	AB	AB	BB	BB	AB	BB	AB	BB	AA	AA	AA	AA	AA	AA	AA	AA	AB	AA	AA	AA	AA	AA
rs6153168	8	8294541	BB	BB	BB	BB	BB	BB	BB	BB	BB	BB	BB	BB	BB	BB	BB	BB	BB	BB	BB	BB	BB	BB	BB	AB	BB	BB	BB	BB	BB	BB	BB	BB	BB	BB	BB	BB	BB	BB	BB	BB	BB	BB	BB	BB	BB	BB	BB
rs13479608	8	11675148	BB	BB	BB	BB	BB	BB	BB	BB	BB	BB	BB	BB	BB	BB	BB	BB	BB	BB	BB	BB	BB	BB	BB	BB	BB	BB	BB	BB	BB	BB	BB	BB	BB	BB	BB	BB	BB	BB	BB	BB	BB	BB	BB	BB	BB	BB	BB
rs6410533	8	14327885	NN	BB	BB	BB	BB	BB	BB	BB	BB	BB	BB	BB	BB	BB	BB	BB	BB	BB	BB	BB	BB	BB	BB	AB	BB	BB	BB	BB	BB	BB	BB	BB	BB	BB	BB	BB	BB	BB	BB	BB	BB	AB	AB	BB	BB	BB	BB
rs13479619	8	15319466	BB	BB	BB	BB	BB	BB	BB	BB	BB	BB	BB	BB	BB	BB	BB	BB	BB	BB	BB	BB	BB	BB	BB	BB	BB	BB	BB	BB	BB	BB	BB	BB	BB	AB	AA	AB	AA	BB	BB	AB	BB	AB	AA	BB	AA	AB	BB
rs3657963	8	16576750	AA	AA	AA	AA	AA	AA	AA	AA	AA	AA	AA	AA	AA	AA	AA	AA	AA	AA	AA	AA	AA	AA	AA	AA	AA	AA	AA	AA	AA	AA	AA	AA	AA	AA	AA	AA	AA	AA	AA	AA	AA	AA	AA	AA	AA	AA	AA
gnf08.014.711	8	18169937	BB	BB	BB	BB	BB	BB	BB	BB	BB	BB	BB	BB	BB	BB	BB	BB	BB	BB	BB	BB	BB	BB	BB	AB	BB	BB	AB	BB	AB	AB	BB	AB	BB	AB	AB	AA	AA	AB	AB	AB	AB	AA	AA	AA	AA	AA	AB
rs4140004	8	21285113	AA	AA	AA	AA	AA	AA	AA	AA	AA	AA	AA	AA	AA	AA	AA	AA	AA	AA	AA	AA	AA	AA	AA	AA	AA	AA	AA	AA	AA	AA	AA	AA	AA	AA	AA	AA	AA	AA	AA	AA	AA	AA	AA	AA	AA	AA	AA
rs3661760	8	22251497	AA	AA	AA	AA	AA	AA	AA	AA	AA	AA	AA	AA	AA	AA	AA	AA	AA	AA	AA	AA	AA	AA	AA	AB	AB	AB	BB	AA	AB	AA	AA	AB	AB	AB	BB	BB	BB	AB	AB	AB	AB	AB	AB	BB	BB	AB	AB
rs13479656	8	24309617	AA	AA	AA	AA	AA	AA	AA	AA	AA	AA	AA	AA	AA	AA	AA	AA	AA	AA	AA	AB	AA	AA	AA	AA	AB	AB	BB	AA	AB	AB	AA	BB	AB	BB	AB	AB	BB	BB	AB	BB	AB	AB	BB	AA	AB	AA	AB
CEL-8_25963079	8	25963079	BB	BB	BB	BB	BB	BB	BB	BB	BB	BB	BB	BB	BB	BB	BB	BB	BB	BB	BB	AA	BB	BB	BB	AB	AB	AB	AB	BB	BB	AB	BB	AB	AB	AA	AA	AB	BB	AA	AA	AA	AA	AA	AB	AA	AB	AA	AA
rs4227096	8	30204827	BB	BB	BB	BB	BB	BB	BB	BB	BB	BB	BB	BB	BB	BB	BB	BB	BB	BB	BB	BB	BB	BB	BB	BB	BB	BB	BB	BB	BB	BB	BB	BB	BB	BB	BB	BB	BB	BB	BB	BB	BB	BB	BB	BB	BB	BB	BB
rs3706948	8	30816540	AA	AA	AA	AA	AA	AA	AA	AA	AA	AA	AA	AA	AA	AA	AA	AA	AA	AA	AA	AA	AA	AA	AA	AA	AA	AA	AA	AA	AA	AA	AA	AA	AA	AA	AA	AA	AA	AA	AA	AA	AA	AA	AA	AA	AA	AA	AA
rs3667738	8	37536463	NN	AB	AA	AB	BB	AB	AA	AA	AB	AA	AA	AA	AB	AB	AA	AB	AA	AB	BB	BB	AB	AA	AA	AB	AA	AA	AB	AB	AB	AB	AA	BB	AB	BB	BB	BB	BB	BB	BB	BB	BB	BB	BB	BB	BB	BB	BB
rs13479716	8	38775830	AA	AA	AA	AA	AA	AA	AA	AA	AA	AA	AA	AA	AA	AA	AA	AA	AA	AA	AA	AA	AA	AA	AA	AA	AA	AA	AA	AA	AA	AA	AA	AA	AA	AA	AA	AA	AA	AA	AA	AA	AA	AA	AA	AA	AA	AA	AA
rs3703811	8	39770568	AA	AB	AA	AB	BB	AB	AB	AB	AB	AA	AB	AA	AB	AB	AB	AB	AA	AB	BB	BB	AB	BB	AA	AB	AB	AA	AB	AB	BB	BB	AA	BB	AB	AA	AA	AB	AA	AA	AA	AA	AA	AB	AB	AA	AA	AA	AA
rs3666140	8	42081791	BB	BB	BB	BB	BB	BB	BB	BB	BB	BB	BB	BB	BB	BB	BB	BB	BB	BB	BB	BB	BB	BB	BB	AB	BB	BB	BB	BB	BB	BB	BB	BB	BB	AB	AB	AB	BB	BB	BB	AB	BB	AB	AB	BB	BB	BB	BB
rs6386110	8	43934856	BB	BB	BB	BB	BB	BB	BB	BB	BB	BB	BB	BB	BB	BB	BB	BB	BB	BB	BB	BB	BB	BB	BB	BB	BB	BB	BB	BB	BB	BB	BB	BB	BB	BB	BB	BB	BB	BB	BB	BB	BB	BB	BB	BB	BB	BB	BB
UT_8_46.498556	8	45775629	BB	BB	BB	BB	BB	BB	BB	BB	BB	BB	BB	BB	BB	BB	BB	BB	BB	BB	BB	BB	BB	BB	BB	BB	BB	BB	AB	AB	BB	BB	BB	AB	AB	BB	BB	BB	BB	BB	BB	BB	BB	BB	BB	BB	BB	BB	BB
rs3719401	8	48804736	BB	BB	BB	BB	BB	BB	BB	BB	BB	BB	BB	BB	BB	BB	BB	BB	BB	BB	BB	BB	BB	BB	BB	BB	BB	BB	AB	BB	BB	BB	BB	AB	BB	BB	BB	AB	BB	BB	BB	BB	BB	BB	BB	BB	AB	BB	BB
rs13479755	8	50117838	AA	AA	AA	AA	AA	AA	AA	AA	AA	AA	AA	AA	AA	AA	AA	AA	AA	AA	AA	AA	AA	AA	AA	AA	AA	AA	AA	AA	AA	AA	AA	AA	AB	AA	AA	AA	AA	AB	AB	AA	BB	AB	AA	AB	AA	AB	AB
CEL-8_51607005	8	51607005	NN	AB	AA	AB	BB	AB	AB	AB	AB	AA	AB	AB	AB	AA	AB	AB	AA	BB	BB	BB	AB	AB	AA	AB	BB	AA	AB	BB	BB	BB	AA	BB	AB	BB	BB	BB	BB	AB	AB	BB	AA	AB	BB	AB	BB	AB	AB
rs13479768	8	53532210	BB	BB	BB	BB	BB	BB	BB	BB	BB	BB	BB	BB	BB	BB	BB	BB	BB	BB	BB	BB	BB	BB	BB	BB	BB	BB	BB	AB	BB	BB	BB	BB	BB	BB	BB	BB	BB	BB	BB	BB	BB	BB	BB	BB	BB	BB	BB
rs13479776	8	55177326	BB	BB	BB	BB	BB	BB	BB	BB	BB	BB	BB	BB	BB	BB	BB	BB	BB	BB	BB	AA	BB	BB	BB	AB	AB	BB	AB	AB	BB	AB	BB	AA	AB	AA	AA	AA	AA	AA	AA	AA	AA	AA	AA	AA	AA	AA	AA
rs3725286	8	56141367	AB	AB	BB	AB	AA	BB	AB	AB	AB	BB	AB	AB	AB	BB	AB	BB	BB	AA	AA	AB	AB	AB	BB	AB	AA	AB	BB	AA	AA	AB	BB	AB	AB	AA	AB	AB	AA	AB	AB	AA	BB	BB	AB	AB	AA	AB	AB
rs3707439	8	57724335	AA	AA	AA	AA	AA	AA	AA	AA	AA	AA	AA	AA	AA	AA	AA	AA	AA	AA	AA	AA	AA	AA	AA	AA	AB	AB	AA	AA	AA	AA	AA	AB	AA	AA	AA	AA	AA	AB	AB	AA	BB	AB	AA	AB	AA	AB	AB
rs3672639	8	60120308	BB	BB	BB	BB	BB	BB	BB	BB	BB	BB	BB	BB	BB	BB	BB	BB	BB	BB	BB	BB	BB	BB	BB	BB	BB	BB	BB	BB	BB	BB	BB	BB	BB	BB	AB	BB	BB	BB	BB	BB	BB	BB	BB	BB	BB	BB	BB
rs13479793	8	60901130	AA	AA	AA	AA	AA	AA	AA	AA	AA	AA	AA	AA	AA	AA	AA	AA	AA	AA	AA	BB	AA	AA	AA	AA	AB	AB	AB	AA	AA	AB	AA	BB	AB	BB	BB	BB	BB	BB	BB	BB	BB	BB	BB	BB	BB	BB	BB
rs6372901	8	63043201	AA	AA	AA	AA	AA	AA	AA	AA	AA	AA	AA	AA	AA	AA	AA	AA	AA	AA	AA	BB	AA	AA	AA	AA	AB	AB	AA	AA	AA	AB	AA	AB	AB	AA	AA	AA	AA	AA	AA	AA	AA	AA	AA	AA	AA	AA	AA
rs13479807	8	64586401	BB	BB	AB	AB	BB	AB	BB	BB	AB	BB	BB	AB	BB	BB	AB	AA	BB	BB	BB	AB	BB	BB	BB	AB	BB	BB	AA	BB	BB	AB	BB	AB	AB	BB	BB	BB	BB	BB	BB	BB	BB	BB	BB	BB	BB	BB	BB
rs13479811	8	66034595	BB	BB	BB	BB	BB	BB	BB	BB	BB	BB	BB	BB	BB	BB	BB	BB	BB	BB	BB	BB	BB	BB	BB	BB	BB	BB	BB	BB	BB	AA	BB	BB	BB	BB	BB	BB	BB	BB	BB	BB	BB	BB	BB	BB	BB	BB	BB
rs3699406	8	68996069	AA	AA	AA	AA	AA	AA	AA	AA	AA	AA	AA	AA	AA	AA	AA	AA	AA	AA	AA	AA	AA	AA	AA	AA	AA	AA	AB	AA	AB	AA	AA	AA	AA	AA	AA	AA	AA	AA	AA	AA	AA	AA	AA	AA	AA	AA	AA
rs13479830	8	72013995	BB	BB	BB	BB	BB	BB	BB	BB	BB	BB	BB	BB	BB	BB	BB	BB	BB	BB	BB	BB	BB	BB	BB	BB	BB	BB	BB	BB	BB	AB	BB	BB	BB	BB	BB	AA	BB	BB	BB	BB	BB	AB	AB	AB	AB	BB	BB
rs4227253	8	74193741	AA	AA	AB	AB	AA	AB	AA	AA	AB	AA	AB	AB	AA	AA	AB	BB	AA	AA	AA	BB	AA	AB	AA	BB	AB	AB	BB	AA	AA	AB	AA	BB	AB	BB	BB	BB	BB	BB	BB	BB	BB	BB	BB	BB	BB	BB	BB
rs3696502	8	74806749	AA	AA	AA	AA	AA	AA	AA	AA	AA	AA	AA	AA	AA	AA	AA	AA	AA	AA	AA	AB	AA	AA	AA	AB	AA	AA	AB	AA	AA	AA	AA	AB	AB	AA	AB	AB	AA	AB	AB	AA	BB	AB	AA	AA	AB	AA	AB
rs3698093	8	77144203	BB	AB	AB	AB	BB	AB	BB	BB	AB	BB	AB	AB	BB	BB	AB	AA	BB	BB	BB	AB	BB	AB	BB	AA	BB	BB	AA	BB	BB	AB	BB	AB	AB	BB	AB	AB	BB	BB	BB	BB	AB	AB	BB	BB	AB	BB	AB
CZECH-8_78291790	8	78291790	BB	BB	BB	BB	BB	BB	BB	BB	BB	BB	BB	BB	BB	BB	BB	BB	BB	BB	BB	AA	BB	BB	BB	BB	AB	AB	AB	BB	BB	BB	BB	AA	AB	BB	BB	BB	BB	BB	BB	BB	BB	BB	BB	BB	BB	BB	BB
rs4227276	8	80165835	AB	AB	AB	AA	AA	BB	AA	AB	AA	BB	AB	AA	AB	BB	AA	AB	BB	AA	AA	BB	AB	AA	BB	AB	AA	AA	AB	AA	AA	AB	AB	AB	AB	BB	AB	AB	BB	BB	BB	BB	AB	AB	BB	BB	AB	BB	AB
rs13479863	8	82188194	BB	AB	AB	AB	BB	BB	BB	BB	AB	BB	AB	AB	BB	BB	AB	AB	BB	BB	BB	AB	BB	AB	BB	AB	AA	AA	AB	AB	AB	BB	AB	AB	AA	BB	BB	AB	BB	BB	BB	BB	BB	AB	AB	AB	BB	AB	BB
rs6257357	8	84826788	BB	BB	BB	BB	BB	BB	BB	BB	BB	BB	BB	BB	BB	BB	BB	BB	BB	BB	BB	BB	BB	BB	BB	BB	BB	BB	BB	BB	BB	BB	BB	BB	BB	BB	BB	BB	BB	BB	BB	BB	BB	BB	BB	BB	BB	BB	BB
rs13479880	8	86040626	BB	BB	BB	BB	BB	BB	BB	BB	BB	BB	BB	BB	BB	BB	BB	BB	BB	BB	BB	BB	BB	BB	BB	BB	BB	BB	BB	BB	BB	BB	BB	BB	BB	BB	BB	BB	BB	BB	BB	BB	BB	BB	BB	BB	BB	BB	BB
rs13479882	8	86397354	AB	AA	AA	AB	BB	AA	BB	AB	AB	AA	AA	AB	AB	AA	AB	AA	AA	BB	BB	AA	AB	AB	AA	AB	AB	AB	AA	AB	AA	AA	AA	AB	AA	AA	AB	AB	AA	AA	AA	AA	AB	AB	AA	AA	AB	AA	AB
rs13479884	8	86954362	BB	AB	AB	AB	BB	BB	BB	BB	AB	BB	AB	AB	BB	BB	AB	AB	BB	BB	BB	AA	AB	BB	BB	BB	AB	AB	AA	AB	AA	AB	AB	AB	AA	BB	BB	BB	BB	BB	BB	BB	BB	BB	BB	BB	BB	BB	BB
rs13479922	8	91879489	AA	AA	AA	AA	AA	AA	AA	AA	AA	AA	AA	AA	AA	AA	AA	AA	AA	AA	AA	AA	AA	AA	AA	AA	AA	AA	AA	AA	AA	AA	AA	AA	AA	AA	AA	AA	AA	AA	AA	AA	AA	AA	AA	AA	AA	AA	AA
rs6285803	8	95323284	AA	AB	AA	BB	BB	AA	AB	AB	BB	AA	AA	AA	AB	AB	BB	AB	AB	BB	BB	AB	BB	AA	AA	AB	AB	AB	AB	BB	AB	BB	BB	BB	AA	AA	AA	AA	AA	AA	AA	AA	AA	AA	AA	AA	AA	AA	AA
rs13479947	8	98654267	AA	AA	AA	AA	AA	AA	AA	AA	AA	AA	AA	AA	AA	AA	AA	AA	AA	AA	AA	BB	AA	AA	AA	AB	AB	AB	AB	AB	AA	AB	AA	BB	AB	BB	AB	AA	BB	BB	BB	BB	AB	AA	AB	AB	BB	AB	AB
rs3706149	8	100766333	AA	AA	AA	AA	AA	AA	AA	AA	AA	AA	AA	AA	AA	AA	AA	AA	AA	AA	AA	AA	AA	AA	AA	AA	AA	AB	AA	AA	AB	AB	AA	AA	BB	AA	AB	AB	AA	AA	AA	AA	AB	AB	AB	AB	AA	AB	AB
rs3669235	8	101399186	AA	AB	AA	BB	BB	AA	AB	AB	BB	AA	AA	AA	AB	AB	BB	AB	AB	BB	BB	AA	BB	AA	AA	BB	AA	AB	AA	AB	AB	BB	BB	AA	AB	AA	AA	AA	AA	AA	AA	AA	AA	AA	AA	AA	AA	AA	AA
rs13479956	8	101681071	AA	AA	AA	AA	AA	AA	AA	AA	AA	AA	AA	AA	AA	AA	AA	AA	AA	AA	AA	AA	AA	AA	AA	AA	AA	AA	AA	AA	AA	AA	AA	AA	AA	AA	AB	AB	AA	AA	AA	AA	AB	AB	AA	AA	AA	AA	AB
rs3705275	8	102686478	BB	BB	BB	BB	BB	BB	BB	BB	BB	BB	BB	BB	BB	BB	BB	BB	BB	BB	BB	BB	BB	BB	BB	BB	BB	BB	BB	BB	BB	BB	BB	BB	BB	BB	BB	BB	BB	BB	BB	BB	BB	BB	BB	BB	BB	BB	BB
gnf08.108.032	8	106117382	AA	AA	AA	AB	BB	AA	AA	AB	AB	AA	AA	AA	AB	AB	AB	AA	AB	AB	BB	BB	AB	AA	AA	AA	AA	AA	AA	AA	AA	AB	AB	AA	AA	AA	AA	AA	AA	AA	AA	AA	AA	AA	AA	AA	AA	AA	AA
rs3662808	8	108727362	BB	AB	AB	AA	AA	AB	BB	AB	AA	BB	AA	AB	AB	AB	AA	AB	AB	AA	AA	AA	AA	BB	AB	AA	AB	BB	AB	AA	AB	AB	AA	AB	BB	AA	AB	AB	AA	AA	AA	AA	AB	AB	AA	AA	AA	AA	AB
rs6237645	8	109333466	BB	BB	BB	BB	BB	BB	BB	BB	BB	BB	BB	BB	BB	BB	BB	BB	BB	BB	BB	BB	BB	BB	BB	BB	BB	BB	BB	BB	BB	BB	BB	BB	BB	BB	BB	BB	BB	BB	BB	BB	BB	BB	BB	BB	BB	BB	BB
rs13479995	8	113066370	BB	BB	BB	BB	BB	BB	BB	BB	BB	BB	BB	BB	BB	BB	BB	BB	BB	BB	BB	BB	BB	BB	BB	BB	BB	BB	BB	BB	BB	AB	BB	BB	BB	AA	AA	AB	AA	AA	AA	AA	AA	AA	AB	AA	AA	AA	AA
gnf08.118.027	8	116198601	AA	BB	AB	AB	AB	AB	AB	AB	BB	AA	BB	AB	AB	BB	BB	AB	BB	AB	BB	AA	BB	AA	AB	BB	BB	AB	BB	BB	AB	BB	BB	BB	AB	BB	AB	AA	BB	BB	BB	AB	AB	AA	AB	AB	BB	AB	AB
rs3708073	8	121235325	AB	AA	BB	AB	AB	BB	AB	BB	AB	AB	AB	AB	BB	BB	AB	AA	AB	AB	AB	BB	AB	BB	BB	AB	BB	BB	AB	AB	BB	AB	AB	BB	BB	BB	AB	AA	BB	BB	BB	AB	AB	AA	AB	AB	BB	AB	AB
rs6377872	8	121825605	AA	AA	AA	AA	AA	AA	AA	AA	AA	AA	AA	AA	AA	AA	AA	AA	AA	AA	AA	AA	AA	AA	AA	AA	AA	AA	AA	AA	AA	AB	AA	AA	AA	AA	AA	AA	AA	AA	AA	AA	AA	AA	AA	AA	AA	AA	AA
rs3705725	8	123350039	AB	AA	BB	BB	AB	BB	AB	BB	AB	AB	AB	AB	BB	BB	AB	AA	AB	BB	AB	BB	AB	BB	BB	AB	BB	BB	BB	AB	BB	AB	AB	BB	BB	BB	BB	AB	BB	BB	BB	BB	BB	BB	AB	BB	BB	BB	BB
rs6400423	8	125966003	BB	BB	BB	BB	BB	BB	BB	BB	BB	BB	BB	BB	BB	BB	BB	BB	BB	BB	BB	BB	BB	BB	BB	BB	BB	BB	AB	BB	BB	BB	BB	BB	BB	BB	BB	BB	BB	BB	BB	BB	BB	BB	BB	BB	BB	BB	BB
rs3697596	8	127236890	AB	BB	AB	AA	AB	AB	AA	AB	BB	AB	BB	BB	AB	BB	BB	BB	BB	AA	BB	BB	AB	AA	AB	AB	AB	AA	BB	AB	AB	AB	BB	AA	AA	BB	AB	AA	BB	AB	AB	AB	AA	AA	AB	AB	BB	AB	AB
mCV23893269	9	3980881	AA	AA	AA	AA	AA	AA	AA	AA	AA	AA	AA	AA	AA	AA	AA	AA	AA	AA	AA	AB	AA	AA	AA	AA	AA	AA	AB	AA	AB	AB	AA	AB	AA	AB	AA	AA	AA	AB	AB	AA	BB	AB	AA	AA	AA	AA	AB
mCV23053483	9	6793269	AA	AB	AB	AB	AB	AB	AA	BB	BB	AB	BB	BB	AA	AA	AB	AB	AA	AA	BB	AA	AB	BB	BB	AB	AA	AB	AB	AB	AB	AB	AB	AA	BB	AA	AB	AB	AA	AB	AB	AB	AA	AB	AA	AB	BB	AB	AB
rs13480065	9	9289357	BB	AB	AB	AB	AB	AB	BB	AB	AA	AB	AA	AA	BB	BB	AB	AB	BB	BB	AA	AA	AB	AA	AA	AA	BB	AB	AA	AB	AA	AB	AB	AB	AA	BB	BB	BB	BB	BB	BB	BB	BB	BB	BB	BB	BB	BB	BB
rs13480092	9	18988599	AA	AA	AB	AA	AB	AB	AA	AB	BB	AB	BB	AB	AA	AA	AB	AB	AA	AA	AB	BB	AB	BB	AB	AB	AB	BB	AB	AB	AB	AB	AB	AA	AB	AA	AA	AA	AA	AA	AA	AA	AA	AA	AA	AA	AA	AA	AA
rs8270115	9	21900659	AA	AA	AA	AA	AA	AA	AA	AA	AA	AA	AA	AA	AA	AA	AA	AA	AA	AA	AA	AB	AA	AA	AA	AA	AB	AB	AB	AA	AB	AB	AA	AB	AA	BB	AB	AB	AB	BB	BB	AB	BB	BB	BB	BB	AA	BB	BB
rs13480103	9	23359729	AA	AA	AB	AA	AB	AB	AA	AB	BB	AB	BB	AB	AA	AA	AB	AB	AA	AA	AB	BB	AB	BB	AB	AB	BB	BB	BB	BB	BB	BB	AB	BB	BB	AB	BB	BB	BB	AB	AA	BB	AB	BB	BB	BB	BB	BB	AA
rs3088801	9	24949186	BB	BB	BB	BB	BB	BB	BB	BB	BB	BB	BB	BB	BB	BB	BB	BB	BB	BB	BB	BB	BB	BB	BB	BB	BB	BB	BB	BB	BB	BB	BB	BB	BB	BB	BB	BB	BB	BB	BB	BB	BB	BB	BB	BB	BB	BB	BB
rs6404775	9	28016429	BB	BB	AB	BB	AB	AB	BB	AB	AA	AB	BB	AB	BB	BB	AB	AB	BB	BB	AB	BB	AB	AA	AB	BB	AB	BB	AB	AA	BB	AB	AB	AB	AA	AB	AA	AA	AB	AB	AB	AA	AB	AA	AB	AA	AA	AA	AB
rs6385855	9	29608871	BB	BB	BB	BB	BB	BB	BB	BB	BB	BB	BB	BB	BB	BB	BB	BB	BB	BB	BB	AB	BB	BB	BB	AB	BB	BB	BB	BB	BB	BB	BB	BB	BB	BB	BB	BB	BB	BB	BB	BB	BB	BB	BB	BB	BB	BB	BB
rs3655898	9	33657166	BB	BB	BB	AB	AB	BB	BB	AB	AA	AB	BB	BB	BB	AB	AB	AB	BB	BB	AB	BB	AA	AA	BB	AB	AB	AB	AB	BB	AB	AA	AB	AB	AB	AB	AB	AB	BB	AA	AB	AB	AA	AA	BB	AB	AA	AB	AB
rs3711756	9	34437206	BB	BB	BB	BB	BB	BB	BB	BB	BB	BB	BB	BB	BB	BB	BB	BB	BB	BB	BB	BB	BB	BB	BB	BB	BB	BB	BB	BB	BB	BB	BB	BB	BB	BB	BB	BB	BB	BB	BB	BB	BB	BB	BB	BB	BB	BB	BB
UT_9_35.918713	9	35184595	BB	BB	BB	AB	AB	BB	BB	AB	AA	AB	BB	BB	BB	AB	AB	AB	BB	BB	AB	BB	AA	AA	BB	BB	BB	BB	AB	BB	AB	AB	BB	AB	AB	BB	BB	AB	BB	AB	BB	BB	AB	AB	BB	BB	AA	AB	BB
rs13480141	9	36959921	AA	AB	AA	AB	AA	AA	AA	AB	AA	AA	AA	AA	AA	AA	AB	AB	AB	AA	AB	AB	AA	AA	AB	BB	AB	AA	AB	BB	AA	AA	BB	AB	AB	BB	AB	BB	AB	BB	BB	AB	BB	AB	BB	AB	BB	BB	BB
rs13480150	9	39740553	BB	BB	BB	BB	BB	BB	BB	BB	BB	BB	BB	BB	BB	BB	BB	BB	BB	BB	BB	AB	BB	BB	BB	BB	AB	AB	BB	BB	BB	BB	BB	BB	BB	AB	BB	BB	AB	BB	AB	BB	AB	BB	BB	BB	BB	BB	AB
rs3714664	9	40768895	AA	AB	AA	AB	AA	AA	AA	AB	AA	AA	AA	AA	AA	AA	AB	AB	AB	AA	AB	AA	AA	AA	AB	AA	AB	AA	AB	BB	AA	AA	AB	AB	AB	AB	BB	AB	AB	AB	BB	BB	AB	AA	AB	AB	AA	AA	BB
rs4135590	9	43060131	BB	AB	BB	BB	BB	BB	BB	AB	BB	BB	BB	BB	BB	BB	AB	AB	AB	BB	AB	BB	BB	BB	AB	BB	AA	AB	AB	AA	BB	AB	AA	AB	AB	AA	AB	AA	AA	AA	AB	AA	AB	AA	AA	AA	AA	AA	AB
rs13462199	9	44740915	AB	AA	AA	BB	AB	AA	AA	AB	BB	AB	AA	AA	AA	AB	AB	AB	AA	AA	AB	AB	BB	BB	AA	AB	AB	AB	AB	AA	AB	BB	AB	AB	AB	AB	AB	AB	BB	AB	AB	BB	AA	AA	AB	AB	AA	AB	AB
rs13480173	9	46633516	AA	AB	AA	AA	AA	AA	AA	AB	AA	AA	AA	AA	AA	AA	AB	AB	AB	AA	AB	AA	AA	AA	AB	AA	AB	AA	AB	BB	AA	AA	AB	AB	AB	AA	AA	AA	AA	AB	AA	AA	AB	AA	AA	AA	AA	AA	AA
rs6395817	9	47519917	BB	AB	BB	BB	BB	BB	BB	AB	BB	BB	BB	BB	BB	BB	AB	AB	AB	BB	AB	AB	BB	BB	AB	BB	AA	AB	AB	AA	BB	AB	AA	AB	AB	AB	AB	AA	AA	AB	AB	AA	BB	AA	AA	AA	AA	AA	AB
gnf09.042.496	9	48315615	BB	BB	BB	BB	BB	BB	BB	BB	BB	BB	BB	BB	BB	BB	BB	BB	BB	BB	BB	BB	BB	BB	BB	BB	BB	BB	BB	BB	BB	BB	BB	BB	BB	BB	BB	BB	BB	BB	BB	BB	BB	BB	BB	BB	BB	BB	BB
rs13480186	9	50318725	AA	AA	AA	AA	AA	AA	AA	AA	AA	AA	AA	AA	AA	AA	AA	AA	AA	AA	AA	AA	AA	AA	AA	AA	AA	AA	AA	AA	AA	AA	AA	AA	AA	AB	BB	AB	AB	AB	BB	BB	AB	AA	AB	AB	AA	AA	BB
rs3723670	9	52682809	BB	BB	BB	BB	BB	BB	BB	BB	BB	BB	BB	BB	BB	BB	BB	BB	AB	BB	BB	BB	BB	BB	BB	AB	BB	BB	BB	BB	BB	AB	BB	BB	BB	AB	AB	AA	AB	AA	AB	AA	AB	AB	AB	AA	AA	AB	AB
rs13480208	9	55395056	AA	AA	AA	AA	AA	AA	AA	AA	AA	AA	AA	AA	AA	AA	AA	AA	AA	AA	AA	AA	AA	AA	AA	AA	AA	AA	AA	AA	AA	AA	AA	AA	AA	AA	AA	AA	AA	AA	AA	AA	AA	AA	AA	AA	AA	AA	AA
rs3666398	9	56790950	AA	BB	BB	AB	AB	BB	AB	AB	AB	AA	BB	AB	AB	AB	BB	BB	AB	AB	AB	AB	AA	AA	AA	AA	BB	AB	BB	BB	AB	AB	BB	BB	AB	AA	AA	AA	AA	AA	AA	AA	AA	AB	AB	AA	AA	AB	AA
rs13480217	9	58024426	AA	AA	AA	AA	AA	AA	AA	AA	AA	AA	AA	AA	AA	AA	AA	AA	AA	AA	AA	AB	AA	AA	AA	AA	AA	AA	AA	AA	AA	AA	AB	AA	AA	AA	AA	AA	AA	AA	AA	AA	AA	AA	AA	AA	AA	AA	AA
rs6224703	9	60196412	BB	BB	BB	BB	BB	BB	BB	BB	BB	BB	BB	BB	BB	BB	BB	BB	BB	BB	BB	BB	BB	BB	BB	BB	BB	BB	BB	BB	BB	BB	BB	BB	BB	BB	BB	BB	BB	BB	BB	BB	BB	BB	BB	BB	BB	BB	BB
rs3714012	9	61377354	BB	BB	BB	BB	BB	BB	BB	BB	BB	BB	BB	BB	BB	BB	BB	BB	BB	BB	BB	BB	BB	BB	BB	BB	BB	BB	BB	BB	BB	BB	AB	BB	BB	BB	BB	BB	AB	BB	BB	BB	BB	BB	AB	BB	BB	AB	BB
gnf09.057.223	9	63239299	AA	AA	AA	AA	AA	AA	AA	AB	AA	AA	AA	AA	AA	AA	AB	AB	AA	AA	AB	AA	AA	AA	AA	AB	BB	AA	BB	BB	AA	AB	AB	BB	AA	AA	AA	AA	AA	AA	AA	AA	AA	AA	AB	AA	AA	AB	AA
rs3655717	9	65704935	BB	BB	BB	BB	BB	BB	BB	BB	BB	BB	BB	BB	BB	BB	BB	BB	BB	BB	BB	AB	BB	BB	BB	BB	BB	BB	BB	BB	BB	BB	AB	BB	BB	AB	BB	BB	AB	BB	AB	BB	AB	AB	BB	BB	BB	BB	AB
rs6174757	9	68381485	BB	BB	BB	BB	BB	BB	BB	BB	BB	BB	BB	BB	BB	BB	BB	BB	BB	BB	BB	BB	BB	BB	BB	BB	BB	BB	BB	BB	BB	BB	AB	BB	BB	BB	BB	BB	BB	BB	BB	BB	BB	BB	BB	BB	BB	BB	BB
rs6355445	9	70209362	BB	AA	AA	AB	AB	AB	BB	BB	AB	BB	AA	AB	AB	BB	AB	AB	AB	AB	BB	BB	BB	BB	BB	BB	BB	AB	BB	BB	BB	BB	BB	BB	AB	BB	BB	AB	AB	BB	BB	BB	BB	AA	AA	AB	AA	AA	BB
rs3721056	9	71328971	BB	AB	BB	AB	BB	BB	BB	AB	BB	BB	BB	BB	BB	BB	AB	AB	BB	BB	BB	AB	BB	BB	BB	AB	AA	BB	AA	AA	BB	AB	AA	AA	BB	AA	AB	AB	BB	AA	AA	AA	AA	BB	BB	AB	BB	BB	AA
rs13480271	9	73145678	BB	AB	AA	AB	AB	AB	BB	BB	AB	BB	AA	AB	AB	BB	AB	AB	AB	AB	BB	BB	BB	AB	AB	AB	BB	AB	BB	BB	BB	BB	BB	BB	AB	BB	BB	BB	BB	BB	BB	BB	BB	BB	BB	BB	BB	BB	BB
rs3724833	9	75221496	AA	AB	AA	AB	AA	AA	AA	AB	AA	AA	AA	AA	AA	AA	AB	AB	AA	AA	AA	AB	AA	AA	AA	AB	BB	AA	BB	BB	AA	BB	BB	BB	AA	AA	AA	AA	AA	AA	AA	AA	AA	AA	AA	AA	AA	AA	AA
rs13480285	9	76908789	BB	BB	BB	BB	BB	BB	BB	BB	BB	BB	BB	BB	BB	BB	BB	BB	BB	BB	BB	BB	BB	BB	BB	BB	BB	BB	BB	BB	BB	BB	BB	BB	BB	BB	BB	BB	BB	BB	BB	BB	BB	BB	BB	BB	BB	BB	BB
rs6257131	9	79059621	AA	AA	AA	AA	AA	AA	AA	AA	AA	AA	AA	AA	AA	AA	AA	AA	AA	AA	AA	AA	AA	AA	AA	AA	AA	AA	AA	AA	AA	AA	AB	AA	AA	AA	AB	AA	AA	AA	AA	AA	AA	AA	AA	AA	AA	AA	AA
gnf09.074.193	9	80458981	BB	BB	BB	BB	BB	BB	BB	BB	BB	BB	BB	BB	BB	BB	BB	BB	BB	BB	BB	AB	BB	BB	BB	BB	BB	AB	BB	BB	BB	BB	BB	BB	BB	BB	AB	BB	AB	BB	BB	BB	BB	BB	BB	BB	BB	BB	BB
rs3676124	9	83548399	AA	AA	AA	AA	AA	AA	AA	AA	AA	AA	AA	AA	AA	AA	AA	AA	AA	AA	AA	AA	AA	AA	AA	AA	AA	AB	AA	AA	AA	AA	AB	AA	AA	AA	AA	AA	AA	AA	AA	AA	AA	AA	AA	AA	AA	AA	AA
rs3695050	9	85584599	AA	AA	AA	AA	AA	AA	AA	AA	AA	AA	AA	AA	AA	AA	AA	AA	AA	AA	AA	AA	AA	AA	AA	AA	AA	AA	AA	AA	AA	AA	AB	AA	AA	AA	AA	AA	AA	AA	AA	AA	AA	AA	AA	AA	AA	AA	AA
rs3700596	9	86745093	BB	BB	BB	BB	BB	BB	BB	BB	BB	BB	BB	BB	BB	BB	BB	BB	BB	BB	BB	BB	BB	BB	BB	AB	BB	AB	BB	BB	BB	BB	BB	BB	BB	BB	BB	BB	BB	BB	BB	BB	BB	BB	BB	BB	BB	BB	BB
rs13480345	9	92060032	AA	BB	BB	BB	AA	AA	AA	BB	AA	AA	BB	AA	AA	AA	BB	AA	BB	AA	AA	BB	AA	AA	BB	BB	BB	BB	BB	BB	AA	AA	BB	BB	BB	AA	AA	AA	AA	AA	AA	AA	AA	AA	AA	AA	AA	AA	AA
rs13480351	9	94137054	BB	BB	BB	BB	BB	BB	BB	BB	BB	BB	BB	BB	BB	BB	BB	BB	BB	BB	BB	AB	BB	BB	BB	BB	AB	BB	AB	BB	BB	BB	BB	AB	BB	AB	BB	BB	BB	BB	BB	BB	BB	AB	AB	BB	AB	AB	BB
CEL-9_95875215	9	95875215	BB	BB	BB	BB	BB	BB	BB	BB	BB	BB	BB	BB	BB	BB	BB	BB	BB	BB	BB	BB	BB	BB	BB	AB	AB	BB	AB	BB	BB	AB	BB	AB	BB	AB	BB	BB	BB	BB	BB	BB	BB	BB	AB	BB	BB	AB	BB
rs3689336	9	96256381	BB	BB	BB	BB	BB	BB	BB	BB	BB	BB	BB	BB	BB	BB	BB	BB	BB	BB	BB	BB	BB	BB	BB	BB	AB	AB	AB	BB	BB	BB	BB	AB	BB	BB	BB	BB	BB	BB	BB	BB	BB	BB	BB	BB	BB	AB	BB
rs13480365	9	98418600	BB	BB	BB	BB	BB	BB	BB	BB	BB	BB	BB	BB	BB	BB	BB	BB	BB	BB	BB	BB	BB	BB	BB	BB	BB	BB	BB	BB	BB	BB	BB	BB	BB	BB	BB	BB	BB	BB	BB	BB	BB	BB	BB	BB	BB	BB	BB
rs6385971	9	99710289	BB	BB	BB	BB	BB	BB	BB	BB	BB	BB	BB	BB	BB	BB	BB	BB	BB	BB	BB	BB	BB	BB	BB	BB	BB	BB	BB	BB	BB	BB	BB	BB	BB	BB	BB	BB	BB	BB	BB	BB	BB	BB	BB	BB	BB	BB	BB
rs3717654	9	101878542	AA	AA	AA	AA	AA	AA	AA	AA	AA	AA	AA	AA	AA	AA	AA	AA	AA	AA	AA	AA	AA	AA	AA	AA	AB	AA	AB	AA	AA	AA	AB	AB	AA	BB	AB	AB	BB	AB	AB	BB	BB	BB	BB	AB	BB	AB	AB
rs13480386	9	103546788	BB	BB	BB	BB	BB	BB	BB	BB	BB	BB	BB	BB	BB	BB	BB	BB	BB	BB	BB	BB	BB	BB	BB	BB	BB	BB	BB	BB	BB	BB	BB	BB	BB	BB	BB	BB	BB	BB	BB	BB	BB	BB	BB	BB	BB	BB	BB
rs3711089	9	105418025	AA	AA	AA	AA	AA	AA	AA	AA	AA	AA	AA	AA	AA	AA	AA	AA	AA	AA	AA	AA	AA	AA	AA	AA	AA	AA	AA	AA	AA	AA	AA	AA	AA	AA	AA	AA	AA	AB	AB	AA	AB	AA	AA	AA	AA	AA	AB
rs13480399	9	106229354	AA	BB	BB	BB	BB	AB	BB	BB	AB	AB	AB	AB	AB	BB	BB	BB	BB	BB	BB	BB	BB	AB	BB	BB	BB	BB	BB	AB	BB	AB	AB	AB	BB	BB	BB	BB	BB	BB	BB	BB	BB	BB	BB	AB	BB	AB	BB
rs13480407	9	108690630	BB	AA	AA	AA	AA	AB	AA	AA	AB	AB	AB	AB	AB	AA	AA	AA	AA	AA	AA	AA	AA	AB	AA	AB	AA	AA	AA	AB	AA	AB	AB	AB	AA	BB	BB	BB	BB	AB	AB	BB	AB	AB	BB	AB	AB	AB	AB
rs13480413	9	109861337	AA	AA	AA	AA	AA	AA	AA	AA	AA	AA	AA	AA	AA	AA	AA	AA	AA	AA	AA	AA	AA	AA	AA	AA	AA	AA	AA	AA	AA	AA	AA	AA	AA	AA	AA	AA	AA	AA	AA	AA	AA	AA	AA	AA	AA	AA	AA
gnf09.110.002	9	113307145	BB	BB	AB	AB	BB	AB	BB	BB	BB	BB	AB	BB	BB	AB	AB	BB	BB	BB	AB	BB	BB	BB	AA	BB	AB	BB	BB	AB	BB	BB	AB	AB	AA	BB	BB	BB	BB	BB	BB	BB	BB	BB	BB	BB	BB	BB	BB
rs6320810	9	115090216	BB	BB	BB	BB	BB	BB	BB	BB	BB	BB	BB	BB	BB	BB	BB	BB	BB	BB	BB	BB	BB	BB	BB	BB	BB	BB	BB	BB	BB	BB	BB	BB	BB	BB	BB	BB	BB	BB	BB	BB	BB	BB	BB	BB	BB	BB	BB
rs3669563	9	117891342	BB	BB	AB	AB	BB	BB	BB	BB	BB	BB	BB	BB	BB	AB	BB	BB	BB	BB	AB	AA	BB	BB	BB	AB	AA	AB	AB	AB	BB	AB	AA	AA	AB	AA	AA	AA	AA	AA	AB	AA	AA	AB	AA	AA	AB	AA	AA
rs13459114	9	121920390	BB	BB	BB	BB	BB	BB	BB	BB	BB	BB	BB	BB	BB	BB	BB	BB	BB	BB	BB	BB	BB	BB	BB	BB	BB	BB	BB	BB	BB	BB	BB	BB	BB	BB	BB	BB	BB	BB	BB	BB	BB	BB	BB	BB	BB	BB	BB
rs3721803	10	3343120	AA	AA	AA	AB	AA	AA	AA	AA	AA	AA	AA	AA	AA	AB	AB	AA	AA	AA	AA	BB	AA	AA	AA	AB	AA	AA	AA	AA	AA	AA	AB	AA	AB	AB	AB	AA	AA	AA	AA	AA	AB	AB	AA	AA	AA	AA	AB
CEL-10_3989939	10	3989939	AA	AA	AA	AB	AA	AA	AA	AA	AA	AA	AA	AA	AA	AB	AB	AA	AA	AA	AA	BB	AA	AA	AA	BB	BB	AA	BB	AB	AA	AB	AB	AA	AB	BB	BB	BB	BB	BB	BB	BB	BB	BB	BB	BB	BB	BB	BB
rs13480473	10	4778214	AA	AA	AA	AB	AA	AA	AA	AA	AA	AA	AA	AA	AA	AB	AB	AA	AA	AA	AA	BB	AA	AA	AA	BB	AB	AA	AB	AB	AA	AB	AB	AA	AB	AB	AA	AB	AB	BB	BB	AB	AB	AB	AB	AB	AB	BB	AB
rs6185923	10	5384467	BB	BB	BB	AB	BB	BB	BB	BB	BB	BB	BB	BB	BB	AB	AB	BB	BB	BB	BB	AA	BB	BB	BB	AA	AA	BB	AA	AB	BB	BB	AB	BB	AB	BB	AB	BB	AB	BB	BB	AB	BB	BB	BB	AB	BB	BB	BB
rs3664101	10	9286770	AA	AA	AA	AB	AA	AA	AA	AA	AA	AA	AA	AA	AA	AB	AB	AA	AA	AA	AA	BB	AA	AA	AA	BB	BB	AA	BB	AB	AA	AB	AB	AA	AB	AB	BB	BB	AB	AA	AB	AB	AB	AB	AB	AB	AB	AB	AB
rs3685588	10	10540887	AA	AA	AA	AB	AA	AA	AA	AA	AA	AA	AA	AA	AA	AB	AB	AA	AA	AA	AA	AB	AA	AA	AA	AB	AA	AA	AA	AA	AA	AA	AB	AA	AB	AB	AA	AB	AA	AA	AA	AB	AA	AA	AB	AA	AB	AA	AA
rs4228112	10	12719980	AA	AA	AA	AB	AB	AA	AA	AA	AA	AA	AA	AA	AB	AB	AA	AA	AA	AA	AA	AB	AA	AA	AA	AB	AA	AA	AA	AA	AA	AB	AB	AA	AB	AB	AB	AB	BB	BB	BB	BB	BB	BB	AB	BB	AB	BB	BB
rs3686911	10	14116427	AA	AA	AA	AB	AB	AA	AA	AA	AA	AA	AA	AA	AB	AB	AA	AA	AA	AA	AA	AB	AA	AA	AA	BB	AA	AB	AA	AA	AA	AB	AA	BB	AB	BB	BB	BB	BB	BB	BB	BB	BB	BB	BB	BB	BB	BB	BB
rs3699409	10	15499377	BB	BB	BB	BB	BB	BB	BB	BB	BB	BB	BB	BB	BB	BB	BB	BB	BB	BB	BB	BB	BB	BB	BB	BB	BB	BB	BB	BB	BB	BB	AB	BB	BB	BB	AB	BB	AA	AA	AB	AB	AA	AA	AB	AA	AB	AB	AA
rs3712394	10	17639020	BB	BB	BB	BB	BB	BB	BB	BB	BB	BB	BB	BB	BB	BB	BB	BB	BB	BB	BB	BB	BB	BB	BB	BB	BB	BB	BB	BB	BB	AB	AB	BB	BB	BB	BB	AA	BB	BB	AB	BB	BB	BB	AB	BB	AB	AB	BB
rs13480527	10	19318252	BB	BB	BB	BB	BB	BB	BB	BB	BB	BB	BB	BB	BB	BB	BB	BB	BB	BB	BB	BB	BB	BB	BB	BB	BB	BB	BB	BB	BB	BB	BB	BB	BB	BB	BB	BB	BB	BB	BB	BB	BB	BB	BB	BB	BB	BB	BB
rs13459119	10	20027450	BB	BB	BB	BB	BB	BB	BB	BB	BB	BB	BB	BB	BB	BB	BB	BB	BB	BB	BB	AB	BB	BB	BB	AA	BB	AB	BB	AB	BB	BB	AB	AB	AB	BB	BB	AA	BB	BB	AB	BB	BB	BB	AB	BB	AB	AB	BB
rs3679120	10	22685808	BB	BB	BB	BB	BB	BB	BB	BB	BB	BB	BB	BB	BB	BB	BB	BB	BB	BB	BB	BB	BB	BB	BB	BB	BB	BB	BB	BB	BB	BB	BB	BB	BB	BB	BB	BB	BB	BB	BB	BB	BB	BB	BB	BB	BB	BB	BB
rs13480547	10	24247475	BB	BB	BB	BB	BB	BB	BB	BB	BB	BB	BB	BB	BB	BB	BB	BB	BB	BB	BB	BB	BB	BB	BB	BB	BB	BB	BB	BB	BB	BB	BB	BB	BB	BB	BB	BB	BB	BB	BB	BB	BB	BB	BB	BB	BB	BB	BB
rs13480554	10	25713665	BB	BB	BB	BB	BB	BB	BB	BB	BB	BB	BB	BB	BB	BB	BB	BB	BB	BB	BB	AB	BB	BB	BB	BB	AB	AB	AB	BB	BB	AB	BB	AB	BB	AA	AA	AA	AA	AA	AA	AA	AA	AA	AA	AA	AA	AA	AA
rs13480563	10	27924915	BB	BB	BB	BB	BB	BB	BB	BB	BB	BB	BB	BB	BB	BB	BB	BB	BB	BB	BB	BB	BB	BB	BB	AA	BB	AB	AB	AA	AB	BB	AA	BB	AA	AA	AA	BB	AA	AA	AB	AA	AA	AA	AB	AA	AB	AB	AA
gnf10.026.889	10	28746498	BB	BB	BB	BB	BB	BB	BB	BB	BB	BB	BB	BB	BB	BB	BB	BB	BB	BB	BB	BB	BB	BB	BB	BB	BB	BB	BB	BB	BB	BB	BB	BB	BB	BB	BB	BB	BB	BB	BB	BB	BB	BB	BB	BB	BB	BB	BB
rs13480570	10	30794652	BB	BB	BB	BB	BB	BB	BB	BB	BB	BB	BB	BB	BB	BB	BB	BB	BB	BB	BB	BB	BB	BB	BB	BB	BB	BB	BB	BB	BB	BB	BB	BB	BB	BB	BB	AB	BB	BB	AB	BB	BB	BB	BB	BB	BB	AB	BB
rs13480578	10	34410603	AA	AA	AA	AA	AA	AA	AA	AA	AA	AA	AA	AA	AA	AA	AA	AA	AA	AA	AA	AA	AA	AA	AA	AA	AA	AA	AA	AA	AA	AA	AA	AA	AA	AA	AA	AA	AA	AA	AA	AA	AA	AA	AA	AA	AA	AA	AA
rs3716113	10	42609040	BB	BB	BB	BB	BB	BB	BB	BB	BB	BB	BB	BB	BB	BB	BB	BB	BB	BB	BB	BB	BB	BB	BB	AB	BB	BB	BB	BB	BB	BB	BB	BB	BB	BB	BB	BB	BB	BB	BB	BB	BB	BB	BB	BB	BB	BB	BB
CEL-10_46671493	10	46671493	BB	BB	BB	BB	BB	BB	BB	BB	BB	BB	BB	BB	BB	BB	BB	BB	BB	BB	BB	BB	BB	BB	BB	BB	BB	BB	BB	BB	BB	AB	BB	BB	BB	BB	BB	BB	BB	BB	BB	BB	BB	BB	BB	BB	BB	BB	BB
rs3676667	10	46923056	BB	BB	BB	BB	BB	BB	BB	BB	BB	BB	BB	BB	BB	BB	BB	BB	BB	BB	BB	BB	BB	BB	BB	AA	AB	BB	AA	AB	AB	AB	AB	BB	AB	AB	AB	AB	BB	BB	BB	AB	BB	BB	BB	BB	BB	BB	BB
rs6382436	10	48683209	BB	BB	BB	BB	BB	BB	BB	BB	BB	BB	BB	BB	BB	BB	BB	BB	BB	BB	BB	BB	BB	BB	BB	AB	BB	AB	BB	BB	BB	BB	AB	AB	AB	BB	BB	BB	BB	BB	BB	BB	BB	BB	BB	BB	BB	BB	BB
gnf10.048.819	10	50989663	AA	AA	AA	AA	AA	AA	AA	AA	AA	AA	AA	AA	AA	AA	AA	AA	AA	AA	AA	AA	AA	AA	AA	AA	AA	AA	AA	AA	AA	AA	AA	AA	AA	AA	AA	AA	AA	AA	AA	AA	AA	AA	AA	AA	AA	AA	AA
rs3696307	10	53783742	BB	BB	BB	BB	BB	BB	BB	BB	BB	BB	BB	BB	BB	AB	BB	AB	BB	BB	BB	BB	BB	BB	BB	BB	BB	BB	BB	BB	BB	BB	BB	BB	BB	BB	BB	BB	BB	BB	BB	BB	BB	BB	BB	BB	BB	BB	BB
rs6190748	10	55832573	AA	AA	AA	AA	AA	AA	AA	AA	AA	AA	AA	AA	AA	AA	AA	AA	AA	AA	AA	BB	AA	AA	AA	AB	AB	AA	AB	BB	AB	AA	BB	BB	BB	BB	AB	BB	AB	AB	BB	BB	AB	AB	AB	AB	BB	AB	AB
rs6374078	10	60860895	AA	AA	AA	AA	AA	AA	AA	AA	AA	AA	AA	AA	AA	AA	AA	AA	AA	AA	AA	AB	AA	AA	AA	AB	BB	AA	AB	BB	AB	AB	BB	BB	BB	AB	AB	AA	AB	AB	AA	AB	AB	AB	AB	AB	AA	AA	AB
rs6359581	10	64294902	AA	AA	AA	AA	AA	AA	AA	AA	AA	AA	AA	AA	AA	AA	AA	AA	AA	AA	AA	AA	AA	AA	AA	AA	AA	AB	AB	AA	AA	AB	AB	AA	AB	AA	AA	AA	AA	AA	AA	AA	AA	AA	AA	AA	AA	AA	AA
rs3723140	10	66179274	BB	BB	BB	BB	BB	BB	BB	BB	BB	BB	BB	BB	BB	BB	BB	BB	BB	BB	BB	AB	BB	BB	BB	BB	BB	BB	BB	BB	BB	AB	BB	BB	BB	BB	BB	BB	BB	BB	BB	BB	BB	BB	BB	BB	BB	BB	BB
rs13480630	10	67595648	AB	AA	AA	AB	AA	AA	AB	AB	AB	AB	AB	AB	AB	AB	AA	AB	AB	BB	AB	AB	AB	AA	AB	AB	AB	AB	BB	BB	AB	AA	BB	AB	BB	AB	AB	AB	AA	AA	AA	AB	AA	AA	AB	AA	BB	AA	AA
rs13480652	10	74437771	AB	AA	AA	AB	AA	AA	AB	AB	AB	AB	AB	AB	AB	AB	AA	AA	AB	AB	AA	AB	AB	AA	AB	AA	AB	AA	AA	AB	AA	AA	AA	AA	AA	AA	AA	AA	AA	AA	AA	AA	AA	AA	AA	AA	AA	AA	AA
rs13480657	10	76584143	BB	BB	BB	BB	BB	BB	BB	BB	BB	BB	BB	BB	BB	BB	BB	BB	BB	BB	BB	BB	BB	BB	BB	BB	BB	BB	BB	BB	BB	BB	BB	BB	BB	BB	BB	BB	BB	BB	BB	BB	BB	BB	BB	BB	BB	BB	BB
rs13480664	10	80556929	BB	BB	BB	BB	BB	BB	BB	BB	BB	BB	BB	BB	BB	BB	BB	BB	BB	BB	BB	BB	BB	BB	BB	BB	BB	BB	BB	BB	BB	BB	BB	BB	BB	BB	BB	BB	BB	BB	BB	BB	AB	BB	BB	BB	BB	BB	AB
rs3717445	10	82649121	AB	AA	AB	BB	BB	BB	AB	AA	AB	AA	AA	AB	AB	AA	BB	BB	AA	AB	AB	BB	AA	BB	AB	AB	BB	AA	AB	BB	BB	AB	AB	AB	AB	AB	AB	AB	BB	BB	AB	AB	AB	AB	BB	BB	BB	AB	AB
rs13480678	10	84352470	AB	AA	AB	BB	BB	BB	AB	AA	AB	AA	AA	AB	AB	AA	BB	BB	AA	AB	AB	AB	AA	BB	AB	AA	AB	AB	BB	BB	BB	AA	BB	AA	AB	AA	AA	AB	AA	AA	AB	AA	AB	AB	AA	AA	AA	AB	AB
rs3679902	10	85007769	BB	BB	BB	BB	BB	BB	BB	BB	BB	BB	BB	BB	BB	BB	BB	BB	BB	BB	BB	BB	BB	BB	BB	BB	BB	AB	AB	BB	BB	BB	AB	AB	BB	AB	AB	AB	BB	AB	AB	AB	BB	BB	AB	AB	AA	AB	BB
rs13480684	10	85606566	AB	BB	AB	AA	AA	AA	AB	BB	AB	BB	BB	AA	AB	BB	AA	AA	BB	AB	AB	AA	BB	AA	AB	BB	AB	BB	AB	AA	AA	AB	AB	BB	AA	BB	BB	BB	BB	BB	BB	BB	BB	BB	BB	BB	BB	BB	BB
CEL-10_86322095	10	86322095	BB	BB	BB	BB	BB	BB	BB	BB	BB	BB	BB	BB	BB	BB	BB	BB	BB	BB	BB	BB	BB	BB	BB	BB	BB	BB	BB	BB	BB	BB	BB	BB	BB	BB	BB	BB	BB	BB	BB	BB	BB	BB	BB	BB	BB	BB	BB
rs3089366	10	89439033	BB	BB	BB	BB	BB	BB	BB	BB	BB	BB	BB	BB	BB	BB	BB	BB	BB	BB	BB	AB	BB	BB	BB	BB	BB	AB	AB	BB	BB	BB	AB	BB	BB	BB	BB	BB	BB	BB	BB	BB	BB	BB	BB	BB	BB	BB	BB
gnf10.091.965	10	92745604	AA	AA	AA	AA	AA	AA	AA	AA	AA	AA	AA	AA	AA	AA	AA	AA	AA	AA	AA	AA	AA	AA	AA	AA	AA	AB	AB	AA	AA	AA	AB	AA	AA	AA	AA	AA	AA	AA	AA	AA	AA	AA	AA	AA	AA	AA	AA
rs13480712	10	93288075	AB	BB	AB	AA	AA	AA	AB	BB	AB	BB	AB	AA	AB	BB	AA	AA	BB	AB	AB	BB	BB	AA	AB	AB	AB	AA	AA	AA	AB	BB	AA	BB	AB	AB	BB	BB	BB	BB	BB	AB	AB	AB	AB	AB	BB	BB	AB
rs13480716	10	94290709	BB	BB	BB	BB	BB	BB	BB	BB	BB	BB	BB	BB	BB	BB	BB	BB	BB	BB	BB	BB	BB	BB	BB	BB	BB	BB	BB	BB	BB	BB	BB	BB	BB	BB	BB	BB	BB	BB	BB	BB	BB	BB	BB	BB	BB	BB	BB
rs6175332	10	98639384	BB	BB	BB	BB	BB	BB	BB	BB	BB	BB	BB	BB	BB	BB	BB	BB	BB	BB	BB	BB	BB	BB	BB	AB	AB	AB	BB	BB	AB	BB	BB	AA	AB	BB	BB	BB	BB	BB	BB	BB	BB	BB	BB	BB	BB	BB	BB
rs3683912	10	99061427	AA	AA	AA	AA	AA	AA	AA	AA	AA	AA	AA	AA	AA	AA	AA	AA	AA	AA	AA	AA	AA	AA	AA	AA	AA	AA	AA	AA	AA	AA	AA	AA	AA	AA	AA	AA	AA	AA	AA	AA	AA	AA	AA	AA	AA	AA	AA
rs13480734	10	102081906	AA	BB	AA	AA	AB	AA	AA	AB	AA	AB	AA	AA	AB	AB	AA	AA	AB	AA	AB	AA	AB	AB	AA	AA	AA	AA	AA	AA	AA	AB	AA	AA	AA	AA	AA	AA	AA	AA	AA	AA	AA	AA	AA	AA	AA	AA	AA
rs13480740	10	103764301	BB	BB	BB	BB	BB	BB	BB	BB	BB	BB	BB	BB	BB	BB	BB	BB	BB	BB	BB	BB	BB	BB	BB	BB	BB	BB	BB	BB	BB	BB	BB	BB	BB	BB	BB	BB	BB	BB	BB	BB	BB	BB	BB	BB	BB	BB	BB
rs3688351	10	104194765	AA	BB	AA	AB	AB	AA	AB	AB	AA	AB	AA	AA	AB	AB	AA	AA	BB	AB	AB	BB	AB	AB	AB	BB	AB	BB	AB	AA	AB	BB	AB	BB	BB	AA	AB	AA	AB	BB	BB	AA	AB	AB	AA	AB	AA	AB	AB
rs13480749	10	105674831	AA	AA	AA	AA	AA	AA	AA	AA	AA	AA	AA	AA	AA	AA	AA	AA	AA	AA	AA	AA	AA	AA	AA	AA	AA	AB	AA	AA	AB	AA	AA	AA	AB	AA	AA	AA	AA	AA	AA	AA	AA	AA	AA	AA	AA	AA	AA
rs6290359	10	107672808	BB	AA	BB	AB	AB	BB	AB	AB	BB	AB	BB	BB	AB	AB	BB	BB	AA	AB	AB	AB	AB	AB	AB	AA	BB	AB	BB	BB	AB	AA	BB	BB	AA	AA	AA	AA	AA	AA	AA	AA	AA	AA	AA	AA	AA	AA	AA
rs6243755	10	108416966	AA	AA	AA	AA	AA	AA	AA	AA	AA	AA	AA	AA	AA	AA	AA	AA	AA	AA	AA	BB	AA	AA	AA	AB	AB	BB	AB	AA	AB	AB	AB	BB	AB	BB	BB	BB	AB	BB	BB	BB	BB	BB	BB	BB	BB	BB	BB
rs13480759	10	109059096	AA	AA	AA	AA	AA	AA	AA	AA	AA	AA	AA	AA	AA	AA	AA	AA	AA	AA	AA	AA	AA	AA	AA	AA	AA	AA	AA	AA	AB	AA	AA	AA	AA	AA	AA	AA	AA	AA	AA	AA	AA	AA	AA	AA	AA	AA	AA
rs3680872	10	114181187	BB	BB	BB	BB	BB	BB	BB	BB	BB	BB	BB	BB	BB	BB	BB	BB	BB	BB	BB	BB	BB	BB	BB	BB	BB	BB	BB	BB	AB	BB	BB	BB	BB	AA	AB	AB	AA	AB	AB	AA	AB	AB	AA	AA	AB	AB	AB
rs13480775	10	115590088	AA	AA	AA	AA	AA	AA	AA	AA	AA	AA	AA	AA	AA	AA	AA	AA	AB	AB	AA	BB	AA	AA	AA	BB	AA	AB	AB	AA	AB	AB	AB	AA	AA	BB	BB	BB	BB	AB	AB	BB	AB	AB	BB	BB	BB	AB	AB
rs6256918	10	117348939	BB	BB	BB	BB	BB	BB	BB	BB	BB	BB	BB	BB	BB	BB	BB	BB	BB	BB	BB	BB	BB	BB	BB	BB	BB	BB	BB	BB	BB	BB	BB	BB	BB	BB	BB	BB	BB	BB	BB	BB	BB	BB	BB	BB	BB	BB	BB
mCV24217147	10	117613736	AA	BB	AA	BB	AB	AB	AB	BB	AA	AB	AA	AA	AB	AB	AA	AA	AB	AB	AB	AB	AB	BB	BB	AB	AB	BB	AA	AA	AB	BB	AA	BB	AB	BB	BB	BB	BB	BB	BB	BB	BB	BB	BB	BB	BB	BB	BB
rs13480803	10	122911418	AA	AA	AA	AA	AA	AA	AA	AA	AA	AA	AA	AA	AA	AA	AA	AA	AA	AA	AA	AA	AA	AA	AA	AA	AB	AB	AB	AA	AA	AB	AA	BB	AA	AB	AA	AB	AA	AA	AA	AA	AA	AA	AA	AA	AB	AA	AA
mCV22832306	10	126086653	AA	BB	AA	AB	AB	AB	AB	BB	AA	AB	AA	AB	AA	AB	AA	AA	AB	AB	AB	AB	AB	AB	BB	AB	AA	BB	BB	AB	AB	AB	AB	BB	AB	AB	AB	AA	AB	AA	AA	AA	AA	AA	AA	AA	AA	AA	AA
rs3697243	10	126634957	BB	AA	BB	AB	AB	AB	AB	AA	BB	AB	BB	AB	BB	AB	BB	BB	AB	AB	AB	AB	AB	AB	AA	AB	BB	AB	BB	AB	AB	BB	BB	BB	AB	BB	AB	BB	BB	BB	BB	BB	BB	BB	BB	BB	BB	BB	BB
rs13480836	11	3448985	AA	AA	AA	AA	AA	AA	AA	AA	AA	AA	AA	AA	AA	AA	AA	AA	AA	AA	AA	AA	AA	AA	AA	AB	BB	AB	AB	AB	AA	AB	AA	AA	AA	AA	AA	AB	AA	AA	AA	AA	AA	AB	AA	AB	AB	AB	AA
rs6190775	11	6306994	BB	AA	AA	AA	BB	BB	AA	AA	AB	AB	BB	AA	BB	AB	AA	AB	AB	AB	AB	BB	AB	AB	AB	BB	AA	AA	AB	AA	AA	AB	AA	AB	AB	BB	BB	BB	BB	BB	BB	BB	BB	BB	BB	BB	BB	BB	BB
rs13480854	11	7518795	AA	BB	BB	BB	AA	AA	BB	BB	AB	AB	AA	BB	AA	AB	BB	AB	AB	AB	AB	AA	AB	AB	AB	AA	BB	BB	AB	BB	BB	BB	BB	AB	AB	BB	AB	AA	AA	AB	AA	BB	AB	AB	AA	AA	AA	AA	AA
rs13480863	11	9188410	AA	AA	AA	AA	AA	AA	AB	AA	AA	AA	AA	AA	AA	AB	AA	AB	AA	AA	AA	AB	AA	AA	AA	AA	AA	AA	AB	AA	AA	AB	AA	AB	AB	AA	AA	AB	AA	AA	AA	AA	AA	AB	AA	AB	AB	AB	AA
rs3023249	11	11065936	BB	BB	BB	BB	BB	BB	BB	BB	BB	BB	BB	BB	BB	BB	BB	BB	BB	BB	BB	AB	BB	BB	BB	BB	BB	BB	AB	BB	BB	BB	BB	AB	AB	BB	BB	BB	BB	BB	BB	BB	BB	BB	BB	BB	BB	BB	BB
rs13480875	11	12190600	AA	AA	AA	AA	AA	AA	AA	AA	AA	AA	AA	AA	AA	AA	AA	AA	AA	AA	AA	AB	AA	AA	AA	BB	BB	AB	BB	AB	AA	AB	AA	AB	AB	AA	AB	BB	BB	AB	BB	AB	AB	AB	BB	BB	BB	BB	BB
CEL-11_14992925	11	14992925	BB	BB	BB	BB	BB	BB	BB	BB	BB	BB	BB	BB	BB	BB	BB	BB	BB	BB	BB	BB	BB	BB	BB	BB	BB	BB	BB	BB	BB	BB	BB	BB	BB	BB	BB	BB	BB	BB	BB	BB	BB	BB	BB	BB	BB	BB	BB
rs6313050	11	15647995	BB	BB	BB	BB	BB	BB	BB	BB	BB	BB	BB	BB	BB	BB	BB	BB	BB	BB	BB	BB	BB	BB	BB	BB	BB	BB	BB	BB	BB	BB	BB	BB	BB	BB	BB	BB	BB	BB	BB	BB	BB	BB	BB	BB	BB	BB	BB
gnf11.017.294	11	18007841	AA	BB	BB	AB	AB	AB	AB	BB	AB	AB	AA	BB	AB	BB	BB	AB	AB	AB	AB	AB	AB	AB	AB	AA	AA	AB	AB	AB	AB	BB	BB	BB	BB	AA	AA	AA	AA	AA	AB	AA	AB	AB	AA	AA	AA	AA	AB
rs3023251	11	20848871	BB	AA	AA	AB	AB	AB	AB	AA	AB	AB	BB	AA	AB	AA	AA	AB	AB	AB	AB	BB	AB	AB	AB	BB	BB	AB	BB	AB	AB	AB	AA	AB	AB	AA	AB	AB	BB	AB	AB	AB	AB	AB	BB	AB	AB	AB	BB
rs13480910	11	22709634	AA	BB	BB	AB	AB	AB	AB	BB	AB	AB	AA	BB	AB	BB	BB	AB	AB	AB	AB	AB	AB	AB	AB	AA	AA	AB	AB	AB	AB	AB	BB	BB	BB	AA	AA	AA	AA	AA	AB	AA	AB	AA	AA	AA	AA	AA	AB
rs3723990	11	26517914	BB	BB	BB	BB	BB	BB	BB	BB	BB	BB	BB	BB	BB	BB	BB	BB	BB	BB	BB	BB	BB	BB	BB	AA	AA	AB	AB	AB	BB	AB	BB	BB	BB	AA	AA	AA	AA	AA	AA	AA	AA	AA	AA	AA	AA	AA	AA
rs3706694	11	28310427	BB	BB	BB	BB	BB	BB	BB	BB	BB	BB	BB	BB	BB	BB	BB	BB	BB	BB	BB	BB	BB	BB	BB	BB	BB	BB	BB	BB	AB	BB	BB	BB	BB	BB	BB	BB	BB	BB	BB	BB	BB	BB	BB	BB	BB	BB	BB
rs3700830	11	30266839	AA	AA	AA	AA	AA	AA	AA	AA	AA	AA	AA	AA	AA	AA	AA	AA	AA	AA	AA	AA	AA	AA	AA	AA	AA	AA	AA	AA	AA	AA	AA	AA	AA	AA	AA	AA	AA	AA	AA	AA	AA	AA	AA	AA	AA	AA	AA
rs13459123	11	30954469	BB	AA	BB	BB	AB	AB	AB	AA	AB	AB	AA	AB	AB	AA	AA	AA	AA	AB	AB	BB	BB	AB	AB	AB	AA	AA	AB	AB	AB	AA	AB	BB	AB	AB	BB	AB	BB	BB	AB	BB	BB	AB	BB	BB	AB	AB	BB
rs3723833	11	32946888	AA	BB	AA	AA	AB	AB	BB	BB	AB	AB	BB	AB	AB	BB	BB	BB	BB	AB	AB	AA	AA	AB	AB	AB	BB	BB	AB	AB	AB	BB	AB	AA	AB	AB	AA	AA	AA	AA	AA	AA	AA	AA	AA	AA	AA	AA	AA
rs6239937	11	34700816	BB	BB	BB	BB	BB	BB	BB	BB	BB	BB	BB	BB	BB	BB	BB	BB	BB	BB	BB	AB	BB	BB	BB	BB	BB	BB	AB	BB	BB	AB	BB	AB	BB	AB	AB	AA	AA	AB	AB	AB	BB	AB	AA	AB	AA	AA	AB
rs13480968	11	36134794	BB	BB	BB	BB	BB	BB	BB	BB	BB	BB	BB	BB	BB	BB	BB	BB	BB	BB	BB	BB	BB	BB	BB	BB	BB	BB	BB	BB	BB	BB	BB	BB	BB	BB	BB	BB	BB	BB	BB	BB	BB	BB	BB	BB	BB	BB	BB
rs6359329	11	38177953	AA	AA	AA	AA	AA	AA	AA	AA	AA	AA	AA	AA	AA	AA	AA	AA	AA	AA	AA	AB	AA	AA	AA	BB	AB	AB	AB	AA	AA	AA	AA	AB	AA	AB	AA	AB	AA	AB	AB	AB	BB	AB	AA	AA	AB	AB	AB
rs6164170	11	39929979	AA	AA	AA	AA	AA	AA	AA	AA	AA	AA	AA	AA	AA	AA	AA	AA	AA	AA	AA	AA	AA	AA	AA	AB	AA	AA	AA	AA	AA	AA	AA	AA	AA	AA	AA	AA	AA	AA	AA	AA	AA	AA	AA	AA	AA	AA	AA
rs3701734	11	40967464	AA	AA	AA	AA	AA	AA	AA	AA	AA	AA	AA	AA	AA	AA	AA	AA	AA	AA	AA	AB	AA	AA	AA	BB	AB	AB	AB	AA	AA	AB	AA	AB	AA	AA	AB	BB	BB	AB	AB	AB	AA	AB	BB	BB	BB	AB	AB
rs3654344	11	43847855	AA	AA	AA	AA	AA	AA	AA	AA	AA	AA	AA	AA	AA	AA	AA	AA	AA	AA	AA	AA	AA	AA	AA	AB	BB	AB	BB	AB	AA	AA	AA	AB	AA	AB	AB	AA	AA	AA	AA	AA	AA	AA	AA	AA	AA	AA	AA
rs13481009	11	46168151	AA	AA	AA	AA	AA	AA	AA	AA	AA	AA	AA	AA	AA	AA	AA	AA	AA	AA	AA	AA	AA	AA	AA	AB	AB	AB	AA	AA	AA	AA	AA	AA	AA	AA	AA	AA	AA	AA	AA	AA	AA	AA	AA	AA	AA	AA	AA
rs13481011	11	46568199	BB	BB	BB	BB	BB	BB	BB	BB	BB	BB	BB	BB	BB	BB	BB	BB	BB	BB	BB	BB	BB	BB	BB	BB	AB	BB	AA	AB	BB	BB	AB	AB	BB	BB	AA	AA	AA	AA	AA	AB	AB	AA	AA	AA	AA	AA	AB
rs6199956	11	50385006	BB	BB	BB	BB	BB	BB	BB	BB	BB	BB	BB	BB	BB	AB	BB	AB	BB	BB	BB	BB	BB	BB	BB	AB	BB	BB	BB	BB	BB	BB	BB	BB	BB	BB	BB	BB	BB	BB	BB	BB	BB	BB	BB	BB	BB	BB	BB
rs13481033	11	54538623	BB	AB	AA	BB	BB	AB	AB	AB	BB	BB	AB	BB	BB	BB	BB	BB	AB	BB	AB	AB	AB	AB	BB	AA	AA	AB	AA	AA	BB	AB	AB	AA	AB	AA	AA	AA	AA	AB	AB	AA	AA	AA	AB	AB	BB	AB	AB
rs4228731	11	55034293	AB	AB	AA	AB	AB	AA	AB	AA	AB	BB	AA	AB	BB	BB	AB	BB	AB	BB	AA	AA	AA	AA	AA	AB	AA	AA	AA	AA	AA	AB	AA	AA	AA	AA	AA	AA	AA	AA	AA	AA	AA	AA	AA	AA	AA	AA	AA
rs3684076	11	56050650	BB	BB	AA	BB	BB	AB	AB	AB	BB	BB	AB	BB	BB	BB	BB	BB	AB	BB	AB	BB	AB	AB	BB	BB	BB	BB	AB	AB	BB	BB	AA	AA	AB	AB	AB	AB	AA	AA	AA	AB	AB	AB	AA	AA	AA	AB	AB
rs3697686	11	58180077	BB	BB	BB	BB	BB	BB	BB	BB	BB	BB	BB	BB	BB	BB	BB	BB	BB	BB	BB	BB	BB	BB	BB	BB	BB	BB	BB	BB	BB	BB	BB	BB	BB	BB	BB	BB	BB	BB	BB	BB	BB	BB	BB	BB	BB	BB	BB
rs3711357	11	61065104	BB	BB	BB	BB	BB	BB	BB	BB	BB	BB	BB	BB	BB	BB	BB	BB	BB	BB	BB	BB	BB	BB	BB	AB	BB	BB	BB	BB	BB	BB	BB	BB	BB	BB	BB	BB	BB	BB	BB	BB	BB	BB	BB	BB	BB	BB	BB
rs13481061	11	62605165	AB	AA	BB	AB	AB	BB	AB	BB	AB	AA	BB	AB	AA	AA	AB	AA	AB	AA	BB	BB	BB	BB	AB	AA	AB	BB	AA	AB	BB	AB	AB	AB	BB	AB	AA	AB	AA	BB	BB	AB	BB	AA	AB	AB	BB	AB	BB
rs13481071	11	64813366	AB	AA	BB	AB	AB	BB	AB	BB	AB	AA	BB	AB	AA	AA	AB	AA	AB	AA	BB	AB	BB	BB	AB	AB	AB	AB	AB	BB	BB	AB	AB	AB	BB	AA	AA	AA	AA	AB	AB	AA	AA	AB	AB	AB	BB	BB	AB
rs13481076	11	66331400	BB	BB	BB	BB	BB	BB	BB	BB	BB	BB	BB	BB	BB	BB	BB	BB	BB	BB	BB	AB	BB	BB	BB	AB	AB	BB	AB	BB	BB	AB	BB	BB	BB	BB	BB	BB	BB	BB	BB	BB	BB	BB	BB	BB	BB	BB	BB
rs13481084	11	68383073	AB	BB	AB	AB	AB	AA	AB	AA	AB	BB	AA	AB	BB	BB	AB	BB	AB	BB	AA	AB	AA	AA	AB	AA	BB	AB	BB	AB	AA	AB	AB	AB	AA	BB	BB	BB	BB	BB	BB	BB	BB	BB	BB	BB	BB	BB	BB
rs6197743	11	69789936	BB	BB	BB	BB	BB	BB	BB	BB	BB	BB	BB	BB	BB	BB	BB	BB	BB	BB	BB	BB	BB	BB	BB	AB	AB	BB	AB	BB	BB	AB	AB	BB	BB	AB	AA	AB	AA	BB	BB	AB	BB	AB	AB	AB	BB	BB	BB
mCV24113391	11	71092401	AB	BB	AB	AB	AB	AA	AB	AA	AB	BB	AA	AB	BB	BB	AB	BB	AB	BB	AB	AB	AA	AA	AB	BB	BB	AB	BB	AB	AA	AB	AA	AB	AA	AB	BB	BB	BB	BB	BB	AB	AB	BB	BB	BB	BB	BB	AB
rs13481094	11	72446973	AB	AA	AB	AB	AB	BB	AB	BB	AB	AA	BB	AB	AA	AA	AB	AA	AB	AA	AB	AB	BB	BB	AB	AA	AA	AB	AA	AB	BB	AB	AB	AB	BB	AA	AB	AA	AA	AA	AA	AA	AA	AA	AA	AA	AA	AA	AA
rs3701609	11	72876179	AB	BB	AB	AB	AB	AA	AB	AA	AB	BB	AA	AB	BB	BB	AB	BB	AB	BB	AB	AB	AA	AA	AB	BB	BB	AB	BB	AB	AA	AB	AB	AB	AA	AB	BB	BB	BB	BB	BB	AB	AB	AB	BB	AB	BB	BB	AB
rs13481109	11	76207708	AB	AA	AB	AB	AB	BB	AB	BB	AB	AA	BB	AB	AA	AA	AB	AA	AB	AA	AB	BB	BB	BB	AB	AB	AB	AB	AB	AB	BB	BB	BB	AB	BB	BB	AB	BB	BB	BB	BB	BB	BB	BB	BB	BB	BB	BB	BB
rs13481119	11	79159755	BB	BB	BB	BB	BB	BB	BB	BB	BB	BB	BB	BB	BB	BB	BB	BB	BB	BB	BB	BB	BB	BB	BB	AB	BB	BB	BB	BB	BB	BB	BB	BB	BB	BB	BB	BB	BB	BB	BB	BB	BB	BB	BB	BB	BB	BB	BB
rs6259742	11	82221268	AA	AA	AA	AA	AA	AA	AA	AA	AA	AA	AA	AA	AA	AA	AA	AA	AA	AA	AA	BB	AA	AA	AA	AB	AB	AA	AB	AA	AA	AA	AA	AA	AA	AA	AA	AA	AA	AA	AA	AA	AA	AA	AA	AA	AA	AA	AA
rs13481127	11	83014191	AB	BB	AA	BB	AB	BB	AB	BB	AB	AB	AA	BB	AA	AB	AB	AA	BB	BB	BB	AA	AB	BB	AB	AB	AA	AB	AA	AB	BB	BB	AB	AB	BB	AA	AA	AB	AA	AB	AA	AA	AB	AB	AA	AB	AA	AA	AA
rs3661657	11	84334033	AB	AA	BB	AA	AB	AA	AB	AA	AB	AB	BB	AA	BB	AB	AB	BB	AA	AA	AA	BB	AB	AA	AB	AB	BB	AB	BB	AB	AA	AB	AB	AB	AA	AB	BB	AB	AB	BB	BB	BB	BB	BB	BB	BB	BB	BB	BB
rs3719581	11	86560546	AA	AA	AA	AA	AA	AA	AA	AA	AA	AA	AA	AA	AA	AA	AA	AA	AA	AA	AA	AB	AA	AA	AA	AB	AB	AB	AA	AA	AA	AB	AB	AA	AA	BB	BB	BB	AB	AB	BB	BB	AB	BB	BB	BB	BB	BB	BB
rs13481145	11	88037356	AB	BB	AA	BB	AB	BB	AB	BB	AB	AB	AA	BB	AA	AB	AB	AA	BB	BB	BB	BB	AB	BB	AB	AB	AB	AB	AB	AB	BB	AB	BB	AB	BB	BB	BB	BB	AB	AB	BB	BB	AB	BB	BB	BB	BB	BB	BB
rs3688955	11	90207658	BB	BB	BB	BB	BB	BB	BB	BB	BB	BB	BB	BB	BB	BB	BB	BB	BB	BB	BB	AB	BB	BB	BB	AB	AB	AB	BB	BB	AB	AB	BB	BB	BB	AA	AB	AB	AB	BB	BB	AB	BB	AB	BB	AB	BB	BB	BB
rs13481161	11	92132381	AA	AA	AA	AA	AA	AA	AA	AA	AA	AA	AA	AA	AA	AA	AA	AA	AA	AA	AA	AB	AA	AA	AA	AB	AB	AB	AA	AA	AA	AA	AA	AA	AA	AA	AA	AA	AA	AA	AA	AA	AA	AA	AA	AA	AA	AA	AA
rs3714299	11	92734680	AA	AA	AA	AA	AA	AA	AA	AA	AA	AA	AA	AA	AA	AA	AA	AA	AA	AA	AA	AB	AA	AA	AA	BB	BB	AB	AB	AA	AA	AB	AB	AA	AA	AB	AB	AB	AB	AA	AA	AB	AA	AB	AA	AB	AA	AA	AA
rs13481170	11	95299225	BB	BB	BB	BB	BB	BB	BB	BB	BB	BB	BB	BB	BB	BB	BB	BB	BB	BB	BB	AB	BB	BB	BB	AB	AB	BB	BB	BB	BB	AB	BB	BB	BB	AB	AB	BB	AB	AB	AB	AB	AA	BB	AB	BB	AB	BB	AB
rs13481173	11	96275988	BB	BB	BB	BB	BB	BB	BB	BB	BB	BB	BB	BB	BB	BB	BB	BB	BB	BB	BB	BB	BB	BB	BB	BB	BB	BB	BB	BB	BB	BB	BB	BB	BB	BB	BB	BB	BB	BB	BB	BB	BB	BB	BB	BB	BB	BB	BB
rs3661058	11	98590564	BB	BB	BB	BB	BB	BB	BB	BB	BB	BB	BB	BB	BB	BB	BB	BB	BB	BB	BB	AB	BB	BB	BB	BB	BB	BB	BB	BB	BB	BB	BB	BB	BB	AB	AA	BB	AA	AB	AB	AA	AA	AB	AB	AB	AB	BB	AB
rs3090212	11	99721952	AA	AA	AA	AA	AA	AA	AA	AA	AA	AA	AA	AA	AA	AA	AA	AA	AA	AA	AA	AB	AA	AA	AA	AA	AB	AA	AA	AA	AA	AA	AA	AA	AA	BB	AB	AB	AB	AB	AB	AB	AA	AB	AB	BB	AB	AB	AB
rs6393948	11	103272243	BB	BB	BB	BB	BB	BB	BB	BB	BB	BB	BB	BB	BB	BB	BB	BB	BB	BB	BB	AA	BB	BB	BB	AB	BB	BB	BB	BB	BB	BB	BB	BB	BB	BB	BB	AA	BB	AB	AB	BB	BB	BB	AB	AB	AB	AB	AB
rs3698446	11	104908478	BB	BB	BB	BB	BB	BB	BB	BB	BB	BB	BB	BB	BB	BB	BB	BB	BB	BB	BB	AA	BB	BB	BB	AA	AB	AB	BB	AB	BB	AB	AB	BB	BB	AA	AA	AA	AA	AA	AA	AA	AA	AA	AA	AA	AA	AA	AA
rs6386362	11	106649550	BB	BB	BB	BB	BB	BB	BB	BB	BB	BB	BB	BB	BB	BB	BB	BB	BB	BB	BB	AB	BB	BB	BB	AB	AB	AB	BB	AB	BB	AB	AB	BB	BB	AA	AA	AA	AA	AA	AA	AA	AA	AA	AA	AA	AA	AA	AA
rs6370458	11	109065922	AA	AA	AA	AA	AA	AA	AA	AA	AA	AA	AA	AA	AA	AA	AA	AA	AA	AA	AA	BB	AA	AA	AA	AB	AB	AB	AA	AA	AA	AA	AB	AA	AA	AA	AA	AB	AA	AB	AB	AA	AA	AA	AB	AB	AB	AB	AB
rs13481227	11	110120256	AA	AA	AA	AA	AA	AA	AA	AA	AA	AA	AA	AA	AA	AA	AA	AA	AA	AA	AA	AB	AA	AA	AA	AB	AA	AA	AA	AA	AA	AB	AA	AA	AA	AA	AB	AB	AA	AB	AB	AB	BB	AB	AA	AB	AA	AB	AB
rs3672597	11	111905327	BB	BB	BB	BB	BB	BB	BB	BB	BB	BB	BB	BB	BB	BB	BB	BB	BB	BB	BB	BB	BB	BB	BB	AB	BB	BB	BB	BB	BB	AB	BB	BB	BB	AA	AA	AB	AB	BB	AB	AA	AB	AB	BB	BB	BB	BB	AB
rs3699056	11	113674817	BB	BB	BB	BB	BB	BB	BB	BB	BB	BB	BB	BB	BB	BB	BB	BB	BB	BB	BB	AB	BB	BB	BB	BB	AB	AB	BB	AB	BB	AB	AB	BB	BB	AB	AB	AB	AA	AB	AB	AB	BB	AA	AA	AA	AA	AA	AB
rs13481247	11	115572156	BB	BB	BB	BB	BB	BB	BB	BB	BB	BB	BB	BB	BB	BB	BB	BB	BB	BB	BB	BB	BB	BB	BB	BB	BB	BB	BB	BB	BB	AB	AB	BB	BB	AB	AB	BB	AB	BB	BB	AB	BB	AB	BB	BB	BB	BB	BB
rs3712881	11	120738678	BB	BB	BB	BB	BB	BB	BB	BB	BB	BB	BB	BB	BB	BB	BB	BB	BB	BB	BB	BB	BB	BB	BB	BB	BB	BB	BB	BB	BB	AB	BB	BB	AB	AB	AB	BB	AB	BB	BB	BB	BB	AB	BB	BB	BB	BB	BB
rs3713137	12	4720216	AA	AA	AB	AB	AA	BB	BB	AB	AA	AB	AB	AA	AA	AA	AB	AB	AB	AB	AB	AB	AA	AA	AB	AA	AA	AA	AA	AA	AB	AA	AA	AA	AA	AA	AB	BB	AB	AB	AB	AB	AA	AB	BB	BB	AB	AA	AB
rs3653990	12	5131626	AA	AA	AA	AA	AA	AA	AA	AA	AA	AA	AA	AA	AA	AA	AA	AA	AA	AA	AA	AB	AA	AA	AA	AB	AB	AA	AA	AB	AB	AA	BB	AB	AB	AB	AA	AA	AA	AA	AB	AB	AB	AA	AA	AA	AA	AB	AA
rs13481281	12	5648778	BB	BB	BB	BB	BB	BB	BB	BB	BB	BB	BB	BB	BB	BB	BB	BB	BB	BB	BB	BB	BB	BB	BB	BB	BB	BB	BB	BB	BB	BB	BB	BB	BB	BB	BB	BB	BB	BB	BB	BB	BB	BB	BB	BB	BB	BB	BB
rs3678128	12	7371530	AA	AA	AA	AA	AA	AA	AA	AA	AA	AA	AA	AA	AA	AA	AA	AA	AA	AA	AA	AA	AA	AA	AA	AA	AA	AA	AA	AA	AA	AA	AA	AA	AA	AA	AA	AA	AA	AA	AA	AA	AA	AA	AA	AA	AA	AA	AA
rs6292954	12	10028881	BB	BB	BB	BB	BB	BB	BB	BB	BB	BB	BB	BB	BB	BB	BB	BB	BB	BB	BB	BB	BB	BB	BB	BB	BB	BB	BB	BB	BB	BB	BB	BB	BB	BB	BB	BB	BB	BB	BB	BB	BB	BB	BB	BB	BB	BB	BB
rs13481303	12	12036755	BB	BB	BB	BB	BB	BB	BB	BB	BB	BB	BB	BB	BB	BB	BB	BB	BB	BB	BB	AB	BB	BB	BB	BB	AB	BB	BB	BB	BB	AB	AB	AB	BB	BB	AB	AA	AB	AA	AB	AB	AB	AB	AB	AA	BB	BB	AB
rs3655057	12	13507742	BB	AA	AB	AA	BB	AA	AA	AB	AB	AB	AB	BB	BB	AA	AB	AB	AA	AA	AB	AB	AA	BB	AA	BB	BB	BB	BB	BB	AB	AB	BB	BB	BB	AB	AB	AB	AB	AA	AA	AB	AA	AB	AB	AA	BB	AB	AB
rs13481313	12	14987941	AA	AB	AB	AB	AA	BB	BB	AB	AA	AB	BB	AA	AA	AB	AB	AB	AB	AB	AB	BB	AA	AA	AB	AA	AB	AA	AA	AA	AB	AA	AB	AB	AA	AA	AA	AA	AA	AA	AB	AA	AB	AA	AA	AA	AA	AA	AA
rs3706330	12	16713381	AA	AA	AA	AA	AA	AA	AA	AA	AA	AA	AA	AA	AA	AA	AA	AA	AA	AA	AA	BB	AA	AA	AA	AA	AB	AA	AA	AA	AA	AA	AB	AB	AA	AA	AA	AA	AA	AA	AA	AA	AA	BB	AA	AB	AA	AB	AA
rs13481321	12	16811399	AA	AA	AA	AA	AA	AA	AA	AA	AA	AA	AA	AA	AA	AA	AA	AA	AA	AA	AA	AA	AA	AA	AA	AB	AA	AA	AA	AB	AB	BB	AB	AA	BB	AB	AB	AB	AB	AA	AA	AB	AA	AA	AB	AA	BB	AA	AB
rs13481324	12	17701648	BB	AA	AB	AA	BB	AA	AA	AB	AB	AB	AA	BB	BB	AA	AB	AB	AA	AA	AB	AA	AA	BB	AA	AB	AB	BB	BB	AB	AA	AA	AA	AB	AA	AB	AB	AB	AB	AA	AA	AB	AA	AA	AA	AA	BB	AA	AA
rs3717860	12	19689285	AA	AA	AA	AA	AA	AB	AB	AA	AA	AA	AA	AA	AA	AB	AA	AB	AB	AA	AA	AA	AA	AA	AA	AA	AA	AA	AA	AA	AB	AA	AA	AA	AA	AA	AA	AA	AA	AA	AA	AA	AA	AA	AA	AA	AA	AA	AA
rs6328018	12	21090189	AA	AA	AA	AA	AA	AA	AB	AA	AA	AA	AA	AA	AA	AB	AA	AB	AA	AA	AA	AA	AA	AA	AA	AA	AA	AA	AA	AA	AB	AA	AA	AA	AA	AB	AB	AB	AB	AA	AB	AB	AB	AA	AB	AA	BB	AB	AB
rs13481363	12	22949944	AA	BB	AB	BB	AB	BB	BB	AB	BB	AB	AB	AA	AA	BB	AA	AB	BB	BB	AB	AB	BB	AA	BB	AA	AA	AA	AA	AA	AB	AA	AA	AB	AA	AA	AA	AA	AA	AA	AA	AA	AA	AB	AB	AB	AA	AB	AB
rs3089800	12	23976362	BB	AB	AB	AB	AB	AA	AA	AB	AB	AB	AB	BB	BB	AB	BB	AB	AB	AB	AB	AA	BB	BB	BB	BB	BB	BB	BB	BB	AB	AB	BB	AA	BB	BB	BB	BB	BB	BB	BB	BB	BB	BB	BB	BB	BB	AB	BB
UT_12_24.561109	12	24901541	BB	AA	AB	AA	AB	AA	AA	AB	AA	AB	AB	BB	BB	AB	BB	AB	AA	AB	AB	BB	AB	BB	AA	BB	BB	BB	BB	BB	AB	BB	BB	BB	BB	BB	BB	AB	BB	BB	BB	BB	BB	BB	BB	BB	BB	BB	BB
rs13481371	12	25180902	AA	AA	AA	AA	AA	AA	AA	AA	AA	AA	AA	AA	AA	AA	AA	AA	AA	AA	AA	BB	AA	AA	AA	AA	AA	AA	AA	AA	AA	AA	AA	AB	AA	AB	AA	AA	AA	AA	AA	AA	AA	AA	AA	AA	AA	AA	AA
rs6223000	12	29204179	AA	AA	AA	AA	AA	AA	AA	AA	AA	AA	AA	AA	AA	AA	AA	AA	AA	AA	AA	BB	AA	AA	AA	AA	AA	AA	AA	AB	AA	AB	AA	BB	AA	AB	AA	AA	AA	AA	AB	AA	AB	BB	AA	AB	AA	BB	AA
rs13481392	12	30659819	AA	AA	AA	AA	AA	AA	AA	AA	AA	AA	AA	AA	AA	AA	AA	AA	AA	AA	AA	AA	AA	AA	AA	AB	AA	AA	AA	AB	AB	BB	AB	AA	AB	AA	AA	AA	AA	AA	AA	AA	AA	AA	AA	AA	AA	AA	AA
rs6311081	12	32032739	BB	BB	BB	BB	BB	BB	BB	BB	BB	BB	BB	BB	BB	BB	BB	BB	BB	BB	BB	BB	BB	BB	BB	BB	BB	BB	BB	AB	BB	BB	BB	AB	BB	AB	AA	AA	AA	AA	AA	AA	AA	AA	AA	AA	AA	AB	AA
rs3658100	12	33110635	AA	AA	AB	AB	AB	BB	AB	AA	AB	AA	AB	AA	AA	AB	AA	AB	AA	AA	AA	BB	AA	AA	AA	AB	AA	AA	AA	BB	BB	BB	AB	BB	AB	AA	AA	AA	AA	AB	AB	AA	BB	AB	AA	AA	AA	BB	AB
rs13481406	12	34954150	BB	BB	BB	BB	BB	BB	BB	BB	BB	BB	BB	BB	BB	BB	BB	BB	BB	BB	BB	BB	BB	BB	BB	BB	BB	BB	BB	BB	BB	BB	BB	BB	BB	BB	BB	BB	BB	BB	BB	BB	BB	BB	BB	BB	BB	BB	BB
rs13481408	12	35475720	BB	BB	BB	BB	BB	BB	BB	BB	BB	BB	BB	BB	BB	BB	BB	BB	BB	BB	BB	BB	BB	BB	BB	BB	BB	BB	BB	AB	BB	BB	BB	AA	BB	AB	AB	AB	AB	AB	AB	AB	BB	BB	AB	AB	BB	AB	BB
CEL-12_38788391	12	38788391	BB	BB	BB	AB	BB	AA	AB	BB	AB	BB	BB	BB	BB	AB	BB	AB	BB	BB	BB	BB	BB	BB	BB	BB	BB	BB	BB	BB	AB	BB	BB	AB	BB	AA	AB	AB	AB	BB	BB	AB	BB	BB	AB	BB	AA	BB	AB
rs3726096	12	39432172	AA	AA	AA	AA	AA	AA	AA	AA	AA	AA	AA	AA	AA	AA	AA	AA	AA	AA	AA	AA	AA	AA	AA	AB	AA	AA	AA	BB	AB	BB	AB	AB	AB	AA	AB	AB	AB	AB	AB	AB	AA	AB	AB	BB	AA	AA	AA
CEL-12_40646532	12	40646532	AA	AA	AA	AB	AA	BB	AB	AA	AB	AA	AA	AA	AA	AB	AA	AB	AA	AA	AA	BB	AA	AA	AA	AA	AA	AA	AA	AB	AB	AA	AA	BB	AA	AB	AA	AA	AA	AB	AB	AA	BB	AB	AA	AA	AA	AB	AB
gnf12.046.238	12	43135664	AA	AA	AA	AB	AA	BB	AB	AA	AB	AA	AA	AA	AA	AB	AA	AB	AA	AA	AA	AA	AA	AA	AB	AA	AA	AA	AA	AA	AB	AA	AA	AA	AA	AA	AA	AA	AA	AA	AA	AA	AA	AA	AA	AA	AA	AA	AA
rs13481454	12	47738222	BB	BB	BB	BB	BB	BB	BB	BB	BB	BB	BB	BB	BB	BB	BB	BB	BB	BB	BB	BB	BB	BB	BB	AB	BB	BB	BB	AB	AB	AB	AB	BB	AB	AB	BB	AB	BB	AB	AB	AB	AA	AB	AB	BB	BB	AA	AA
rs3670749	12	48181013	BB	BB	BB	BB	BB	BB	BB	BB	BB	BB	BB	BB	BB	BB	BB	BB	BB	BB	BB	AA	BB	BB	BB	AB	AB	AB	AB	AB	AB	AB	AB	AB	AB	AB	AA	AB	AA	AA	AA	AB	AA	AB	AB	AB	AA	AB	AB
rs3700857	12	49142988	BB	BB	BB	AB	BB	AA	AB	BB	AB	BB	BB	BB	BB	AB	BB	AB	BB	BB	BB	AA	BB	BB	AB	AB	AB	AB	AB	AA	AA	AA	AB	AA	AB	AA	AA	AA	AA	AA	AA	AA	AA	AA	AA	AA	AA	AA	AA
rs13481466	12	51192106	BB	BB	BB	BB	BB	BB	BB	BB	BB	BB	BB	BB	BB	BB	BB	BB	BB	BB	BB	BB	BB	BB	BB	BB	BB	BB	BB	BB	BB	BB	BB	BB	BB	BB	BB	BB	BB	BB	BB	BB	BB	BB	BB	BB	BB	BB	BB
rs3706319	12	53150903	AA	AA	AA	AB	AA	BB	AB	AA	AB	AA	AA	AA	AA	AB	AA	AB	AB	AA	AA	AA	AA	AA	AB	BB	AB	AB	AB	AB	BB	AB	AB	AB	AB	AA	AA	AA	AA	AA	AA	AA	AA	AA	AA	AA	AA	AA	AA
mCV22351241	12	54143643	BB	BB	BB	AB	BB	AA	AB	BB	AB	BB	BB	BB	BB	AB	BB	AB	AB	BB	BB	AA	BB	BB	AB	AA	AB	AB	AB	AA	AA	AA	AB	AA	AB	BB	BB	BB	BB	AB	AB	BB	AA	AA	BB	AB	BB	AA	AB
rs3677344	12	59848542	BB	BB	BB	AB	BB	AA	AB	BB	AB	BB	BB	BB	BB	AB	BB	AB	AB	BB	BB	BB	BB	BB	AB	AA	AA	AA	AA	AB	AA	AB	AB	AB	AB	BB	BB	BB	BB	BB	BB	BB	BB	BB	BB	BB	BB	AB	BB
rs6344105	12	63022076	AA	AA	AA	AA	AA	AA	AA	AA	AA	AA	AA	AA	AA	AA	AA	AA	AA	AA	AA	AA	AA	AA	AA	AA	AA	AA	AA	AA	AA	AA	AA	AA	AA	AA	BB	AB	AB	BB	BB	AB	BB	AB	AB	AB	AA	AA	AB
rs13481514	12	64869269	BB	BB	BB	AB	BB	AA	AB	AB	AB	BB	AB	BB	BB	AB	BB	AB	AB	BB	BB	AA	BB	BB	AB	BB	BB	AB	BB	AB	AB	BB	BB	AA	BB	BB	AB	AB	AB	AA	AA	AB	AA	AB	AB	AB	BB	AB	AB
rs13481521	12	66729742	AA	AB	AA	BB	AA	BB	AB	AB	AB	AB	AB	AA	AA	AB	AA	AB	AB	AB	AA	AA	AA	AA	AB	BB	BB	BB	BB	AB	BB	BB	AB	AA	AB	BB	BB	BB	BB	BB	BB	BB	BB	BB	BB	BB	BB	AB	AB
rs13481527	12	68166409	AA	AA	AA	AA	AA	AA	AA	AA	AA	AA	AA	AA	AA	AA	AA	AA	AA	AA	AA	AA	AA	AA	AA	AA	AA	AA	AA	AA	AA	AA	AA	AA	AA	AA	AA	AA	AA	AA	AA	AA	AA	AA	AA	AA	AA	AA	AA
rs3655558	12	70010856	AA	AA	AA	AA	AA	AA	AA	AA	AA	AA	AA	AA	AA	AA	AA	AA	AA	AA	AA	BB	AA	AA	AA	AA	AA	AA	AA	AA	AA	AA	AA	AB	AA	AA	AA	AA	AA	AA	AA	AA	AA	AA	AA	AA	AA	AA	AA
gnf12.077.067	12	73900965	BB	AB	BB	AB	BB	AB	AB	AB	BB	AB	AB	BB	BB	AA	BB	AB	BB	AA	AB	AA	AB	BB	BB	AA	AA	AA	AA	AA	AA	AB	AB	AB	BB	BB	AB	AA	AB	AA	AB	AB	AB	AB	AB	AB	BB	BB	AA
rs3662628	12	74558132	AA	AA	AA	AA	AA	AA	AA	AA	AA	AA	AA	AA	AA	AA	AA	AA	AA	AA	AA	AA	AA	AA	AA	AA	AA	AA	AA	AA	AA	AA	AA	AA	AA	AA	AA	AA	AA	AA	AA	AA	AA	AA	AA	AA	AA	AA	AA
rs13481561	12	77468587	BB	AB	BB	AB	BB	AB	AB	AB	BB	BB	AB	BB	BB	AA	BB	AB	BB	AA	AB	BB	AB	BB	AB	AB	BB	AA	BB	AB	AB	AB	BB	AB	AA	AA	BB	AB	AB	BB	AB	AB	AB	AB	AB	AB	AB	AB	BB
rs13481565	12	79092079	BB	BB	BB	BB	BB	BB	BB	BB	BB	BB	BB	BB	BB	BB	BB	BB	BB	BB	BB	BB	BB	BB	BB	BB	BB	BB	BB	BB	BB	BB	BB	BB	BB	BB	BB	BB	BB	BB	BB	BB	BB	BB	BB	BB	BB	BB	BB
CEL-12_84750094	12	84750094	BB	BB	BB	BB	BB	BB	BB	BB	BB	BB	BB	BB	BB	BB	BB	BB	BB	BB	BB	BB	BB	BB	BB	BB	BB	BB	BB	BB	BB	BB	BB	BB	BB	BB	BB	BB	BB	BB	BB	BB	BB	BB	BB	BB	BB	BB	BB
rs13481588	12	86574038	AA	AA	AA	AA	AA	AA	AA	AA	AA	AA	AA	AA	AA	AA	AA	AA	AA	AA	AA	AA	AA	AA	AA	AA	AA	AB	AB	AB	AA	AA	AA	AB	AA	AB	AA	AA	AA	AA	AA	AA	AA	AA	AA	AA	AA	AA	AA
rs6207869	12	88966851	BB	BB	BB	BB	BB	BB	BB	BB	BB	BB	BB	BB	BB	BB	BB	BB	BB	BB	BB	BB	BB	BB	BB	BB	BB	BB	BB	BB	BB	BB	BB	BB	BB	AB	BB	BB	AB	AB	AB	AB	AA	AA	BB	AB	AB	AA	AB
rs13481599	12	90714740	BB	BB	BB	BB	BB	BB	BB	BB	BB	BB	BB	BB	BB	BB	BB	BB	BB	BB	BB	BB	BB	BB	BB	BB	BB	BB	BB	BB	BB	BB	BB	BB	BB	BB	BB	BB	BB	BB	BB	BB	BB	BB	BB	BB	BB	BB	BB
rs3716084	12	94501426	AA	AA	AA	AA	AA	AA	AA	AA	AA	AA	AA	AA	AA	AA	AA	AA	AA	AA	AA	AA	AA	AA	AA	AB	BB	AB	AB	AB	AB	AB	AB	AA	AA	AA	AB	AB	AA	AA	AA	AA	AA	AA	AA	AA	AA	AA	AA
rs13481614	12	95793494	AA	AA	AA	AA	AA	AA	AA	AA	AA	AA	AA	AA	AA	AA	AA	AA	AA	AA	AA	AB	AA	AA	AA	AA	AA	AA	AA	AA	AA	AA	AA	AB	AA	AA	AA	AA	AA	AA	AA	AA	AA	AA	AA	AA	AA	AA	AA
rs13481618	12	97207111	BB	BB	BB	BB	BB	BB	BB	BB	BB	BB	BB	BB	BB	BB	BB	BB	BB	BB	BB	AB	BB	BB	BB	BB	AA	AB	AB	AB	AB	AB	AB	BB	BB	BB	BB	AB	BB	AB	BB	BB	AB	AB	BB	AB	BB	BB	AA
rs8273308	12	99106508	AA	AA	AA	AA	AA	AA	AA	AA	AA	AA	AA	AA	AA	AA	AA	AA	AA	AA	AA	AA	AA	AA	AA	AA	AA	AA	AA	AA	AA	AA	AA	AA	AA	AA	AA	AA	AA	AA	AA	AA	AA	AA	AA	AA	AA	AA	AA
rs13481632	12	101121028	BB	BB	BB	BB	BB	BB	BB	BB	BB	BB	BB	BB	BB	BB	BB	BB	BB	BB	BB	AB	BB	BB	BB	BB	BB	BB	BB	BB	BB	BB	BB	BB	BB	AB	BB	AB	AB	AB	AB	BB	BB	BB	AA	BB	AB	AB	BB
rs6390948	12	103432150	AA	AB	AA	AA	AA	AA	AB	AA	AA	AA	AA	AA	AA	AA	AA	AA	AA	AB	AB	AB	AB	AB	AB	AA	AB	AB	AA	AB	BB	AB	AB	AB	AA	AA	AA	AA	AA	AA	AA	AA	AA	AA	AA	AA	AA	AA	AA
CEL-12_104545022	12	104545022	BB	AB	BB	BB	BB	BB	AB	BB	BB	BB	BB	BB	BB	BB	BB	BB	BB	AB	BB	BB	AB	AB	AB	BB	BB	AA	AB	AB	AA	AA	AB	BB	BB	AA	AA	AB	AA	AB	AA	AA	AB	AB	AA	AB	AB	AA	BB
CEL-12_108727612	12	108727612	AB	BB	AA	BB	AB	AB	BB	BB	AA	AB	AA	AB	BB	AB	AA	AB	BB	BB	BB	BB	BB	BB	BB	AB	BB	BB	BB	BB	BB	BB	AB	BB	BB	AB	AB	AB	AA	AB	AB	AB	BB	BB	AA	BB	AB	AB	BB
rs6329833	12	114227574	BB	BB	BB	BB	BB	BB	BB	BB	BB	BB	BB	BB	BB	BB	BB	AB	BB	BB	BB	AA	BB	BB	BB	AB	AB	BB	AB	AB	BB	AB	BB	AA	AB	AB	AB	AA	AB	AB	AB	AB	BB	AB	AA	BB	AA	AA	AB
rs6215262	13	3556871	BB	BB	BB	BB	BB	BB	BB	BB	BB	BB	BB	BB	BB	BB	BB	BB	BB	BB	BB	BB	BB	BB	BB	BB	AB	BB	AB	BB	BB	BB	AB	BB	BB	BB	BB	BB	BB	BB	BB	BB	BB	BB	BB	BB	BB	BB	BB
rs13481668	13	4242635	BB	BB	BB	BB	BB	BB	BB	BB	BB	BB	BB	BB	BB	BB	BB	BB	BB	BB	BB	BB	BB	BB	BB	BB	AB	BB	AB	BB	BB	AB	AB	BB	BB	BB	AB	BB	AB	AB	AB	AB	BB	AB	AA	AB	AB	AA	AB
rs6301008	13	7490090	BB	BB	BB	BB	BB	BB	BB	BB	BB	BB	BB	BB	BB	BB	BB	BB	BB	BB	BB	BB	BB	BB	BB	BB	AB	BB	AB	BB	BB	BB	AB	BB	BB	BB	AB	BB	BB	BB	BB	AB	BB	AB	AA	BB	AB	AB	AB
rs13481683	13	9267297	AA	AA	AA	AA	AA	AA	AA	AA	AA	AA	AA	AA	AA	AA	AA	AA	AA	AA	AA	AA	AA	AA	AA	AA	AA	AA	AA	AA	AA	AB	AA	AA	AA	AA	AB	AA	AA	AA	AA	AB	AA	AB	BB	AA	AB	AB	AB
rs13481689	13	10721776	BB	BB	BB	BB	BB	BB	BB	BB	BB	BB	BB	BB	BB	BB	BB	BB	BB	BB	BB	BB	BB	BB	BB	BB	AB	BB	AB	BB	BB	AB	BB	BB	BB	BB	AB	BB	BB	BB	BB	AB	BB	AB	AA	BB	AB	AB	AB
rs13481697	13	12961456	AA	AA	AA	AA	AA	AA	AA	AA	AA	AA	AA	AA	AA	AA	AA	AA	AA	AA	AA	AB	AA	AA	AA	AA	AB	AA	AB	AB	AA	AB	AA	AA	AA	AA	AA	AA	AB	AA	AA	AA	AA	AA	AA	AA	AA	AB	AA
rs6348604	13	14769173	AA	AA	AA	AA	AA	AA	AA	AA	AA	AA	AA	AA	AA	AA	AA	AA	AA	AA	AA	AB	AA	AA	AA	AB	AA	AA	AA	AA	AA	AA	AB	AA	AA	AA	AA	AA	AA	AA	AB	AA	AB	AA	AA	AA	AA	AA	AA
rs13481706	13	15697964	BB	BB	BB	BB	BB	BB	BB	BB	BB	BB	BB	BB	BB	BB	BB	BB	BB	BB	BB	AB	BB	BB	BB	AB	AB	BB	AB	AB	BB	AB	BB	BB	BB	AB	BB	BB	BB	BB	BB	BB	BB	BB	BB	BB	BB	BB	BB
rs13481715	13	18523821	AB	BB	AB	BB	BB	AB	AB	AB	AB	AA	AB	AB	AB	AA	AB	AB	BB	AB	AB	AA	AB	BB	AB	AA	BB	AB	BB	BB	BB	AB	BB	AA	AA	AB	AA	AA	AA	AA	AA	AA	AA	AA	AA	AA	AA	AA	AA
rs6314295	13	19481485	AB	BB	AB	BB	BB	AB	AB	AB	AB	AA	AB	AB	AB	AA	AB	AB	BB	AB	AB	BB	AB	BB	AB	AB	BB	BB	BB	BB	BB	BB	BB	BB	AB	BB	BB	BB	BB	BB	BB	BB	BB	BB	BB	BB	BB	BB	BB
rs3679784	13	20286264	BB	BB	BB	BB	BB	BB	BB	BB	BB	BB	BB	BB	BB	BB	BB	BB	BB	BB	BB	AA	BB	BB	BB	AB	BB	BB	BB	BB	BB	BB	BB	AB	AB	AB	BB	BB	AB	BB	AB	BB	AA	BB	BB	BB	BB	AA	BB
rs8267104	13	23085429	AA	AA	AA	AA	AA	AA	AA	AA	AA	AA	AA	AA	AA	AA	AA	AA	AA	AA	AA	AB	AA	AA	AA	AB	BB	AB	BB	AB	AA	AA	AB	AB	AA	AB	AB	BB	BB	AB	AB	AB	AA	AA	AA	AB	AB	AB	AA
rs6275055	13	25304682	AB	BB	AB	BB	BB	AB	AB	AB	AB	AA	BB	AB	AB	AA	AB	AB	BB	AB	AB	AA	AB	BB	AB	AA	AA	AB	AA	AB	BB	AB	AB	AA	AB	AA	AA	AA	AA	AA	AA	AA	AA	AA	AA	AA	AA	AA	AA
rs3710348	13	30653000	BB	BB	BB	BB	BB	BB	BB	BB	BB	BB	BB	BB	BB	BB	BB	BB	BB	BB	BB	BB	BB	BB	BB	BB	BB	BB	BB	BB	BB	BB	BB	BB	BB	AB	AB	AB	BB	BB	BB	AB	BB	AB	AA	BB	AA	AB	AB
rs3707097	13	33614779	AA	AA	AA	AA	AA	AA	AA	AA	AA	AA	AA	AA	AA	AA	AA	AA	AA	AA	AA	AB	AA	AA	AA	AA	AB	AA	AB	AB	AA	AB	AA	AB	AB	AA	AB	AB	AA	AA	AA	AB	AA	AB	BB	AA	BB	AB	AB
rs3725187	13	34496200	BB	BB	BB	BB	BB	BB	BB	BB	BB	BB	BB	BB	BB	BB	BB	BB	BB	BB	BB	BB	BB	BB	BB	BB	BB	BB	BB	BB	AB	BB	BB	BB	BB	BB	BB	BB	BB	BB	BB	BB	BB	BB	BB	BB	BB	BB	BB
rs13481764	13	35994885	AB	AB	BB	AA	AA	AB	AA	AB	AB	BB	BB	BB	AB	BB	AB	AB	AA	BB	BB	BB	AB	AA	AB	BB	AA	AB	AA	AB	AB	AA	AB	BB	AB	AB	AA	AA	AB	AA	AA	AB	AA	AA	AA	AA	AA	AB	AA
gnf13.035.637	13	36959616	AA	AA	AA	AA	AA	AA	AA	AA	AA	AA	AA	AA	AA	AA	AA	AA	AA	AA	AA	AA	AA	AA	AA	AA	AA	AA	AA	AA	AA	AA	AA	AA	AA	AA	AA	AA	AA	AA	AA	AA	AA	AA	AA	AA	AA	AA	AA
gnf13.038.133	13	39478973	AB	AB	BB	AA	AA	AB	AA	AA	AB	AB	BB	BB	AB	AB	AB	AB	AA	BB	BB	AB	AA	AA	AB	AB	BB	AB	AB	AB	AB	AB	AB	BB	AB	BB	AB	AB	AB	BB	BB	AB	BB	AB	AA	BB	AA	AA	AB
rs3712907	13	42620079	BB	BB	BB	BB	BB	BB	BB	BB	BB	BB	BB	BB	BB	BB	BB	BB	BB	BB	BB	BB	BB	BB	BB	BB	BB	BB	BB	BB	BB	BB	BB	BB	BB	BB	BB	BB	BB	BB	BB	BB	BB	BB	BB	BB	BB	BB	BB
rs3688207	13	44823434	AA	AA	AA	AA	AA	AA	AA	AA	AA	AA	AA	AA	AA	AA	AA	AA	AA	AA	AA	AA	AA	AA	AA	AA	AA	AA	AA	AA	AA	AA	AA	AA	AA	AB	BB	BB	BB	AA	AB	AB	AB	AB	BB	AA	BB	BB	AB
rs6411274	13	46624183	AB	AA	BB	AA	AB	AB	AA	AB	AB	AB	BB	BB	AA	AA	AB	AB	AB	BB	BB	AA	AB	AA	AA	AA	AA	AA	AA	AA	AB	AA	AA	AA	AA	AA	AA	AA	AA	AA	AA	AA	AA	AA	AA	AA	AA	AA	AA
rs6244558	13	47310947	BB	BB	BB	BB	BB	BB	BB	BB	BB	BB	BB	BB	BB	BB	BB	BB	BB	BB	BB	BB	BB	BB	BB	BB	AB	BB	AB	BB	BB	BB	BB	BB	BB	BB	BB	BB	BB	BB	BB	BB	BB	BB	BB	BB	BB	BB	BB
rs13481809	13	50702277	BB	BB	BB	BB	BB	BB	BB	BB	BB	BB	BB	BB	BB	BB	BB	BB	BB	BB	BB	BB	BB	BB	BB	BB	BB	BB	BB	BB	BB	BB	BB	BB	BB	BB	BB	BB	BB	BB	BB	BB	BB	BB	BB	BB	BB	BB	BB
rs3693942	13	54042656	AA	AA	AA	AA	AA	AA	AA	AA	AA	AA	AA	AA	AA	AA	AA	AA	AA	AA	AA	AB	AA	AA	AA	AB	AB	AB	AA	AB	AB	AA	AB	AB	AA	AA	AB	AA	AA	AA	AA	AB	AA	AA	AA	AA	AA	AA	AA
rs3720782	13	55330594	AB	BB	AA	BB	AB	AB	BB	AB	AB	AB	AA	AA	BB	BB	AB	AB	AB	AA	AA	BB	AB	BB	BB	BB	AB	AB	AB	AA	BB	AB	AB	AA	AB	AA	AB	AB	AB	BB	AB	AB	AB	BB	BB	BB	AB	BB	BB
gnf13.056.787	13	57848844	BB	BB	BB	BB	BB	BB	BB	BB	BB	BB	BB	BB	BB	BB	BB	BB	BB	BB	BB	BB	BB	BB	BB	BB	AB	AB	BB	AB	BB	BB	AB	AB	BB	BB	BB	BB	BB	BB	BB	BB	BB	BB	BB	BB	BB	BB	BB
rs3690198	13	59860578	BB	BB	BB	BB	BB	BB	BB	BB	BB	BB	BB	BB	BB	BB	BB	BB	BB	BB	BB	BB	BB	BB	BB	BB	BB	BB	AA	BB	BB	BB	BB	BB	BB	BB	AB	BB	BB	BB	BB	AB	BB	BB	BB	BB	BB	BB	BB
rs4229817	13	63888326	AB	AB	AA	AA	AB	AB	AA	AB	AA	AA	AA	AA	AB	AA	AA	AB	AA	AB	AA	AB	AA	AA	AA	AA	AA	AA	AA	AA	AA	AA	AA	AA	AA	AA	AB	BB	BB	AA	AA	AA	AA	AA	BB	AA	AB	AB	AB
rs3718727	13	65760534	AA	AA	AA	AA	AA	AA	AA	AA	AA	AA	AA	AA	AA	AA	AA	AA	AA	AA	AA	BB	AA	AA	AA	AB	AB	AB	BB	AB	AB	AB	AB	AB	AB	BB	AB	BB	BB	BB	BB	AB	BB	BB	BB	BB	BB	BB	BB
rs13481871	13	67736821	AA	AA	AA	AA	AA	AA	AA	AA	AA	AA	AA	AA	AA	AA	AA	AA	AA	AA	AA	BB	AA	AA	AA	AA	AB	AB	AA	AB	AA	AA	AB	AB	AA	AA	BB	BB	BB	BB	BB	AB	BB	AB	BB	BB	BB	AB	BB
rs13481880	13	70810674	BB	BB	BB	BB	BB	BB	BB	BB	BB	BB	BB	BB	BB	BB	BB	BB	BB	BB	BB	BB	BB	BB	BB	BB	BB	BB	BB	BB	BB	BB	BB	BB	BB	BB	BB	BB	BB	BB	BB	BB	BB	BB	BB	BB	BB	BB	BB
rs13481883	13	71955117	AA	AA	AA	AA	AA	AA	AA	AA	AA	AA	AA	AA	AA	AA	AA	AA	AA	AA	AA	AB	AA	AA	AA	AA	AA	AA	BB	AA	AA	AA	AA	AA	AA	AA	AB	AB	AA	BB	BB	AA	AB	AA	AA	AB	AB	AA	AA
rs13481893	13	74156236	AA	AA	AA	AA	AA	AA	AA	AA	AA	AA	AA	AA	AA	AA	AA	AA	AA	AA	AA	AA	AA	AA	AA	AA	AA	AA	AA	AA	AA	AA	AA	AA	AA	AA	AA	AA	AA	AA	AA	AA	AA	AA	AA	AA	AA	AA	AA
gnf13.079.671	13	77019901	BB	BB	BB	BB	BB	BB	BB	BB	BB	BB	BB	BB	BB	BB	BB	BB	BB	BB	BB	BB	BB	BB	BB	BB	BB	BB	BB	BB	BB	BB	BB	BB	BB	BB	BB	BB	BB	BB	BB	BB	BB	BB	BB	BB	BB	BB	BB
rs13481908	13	78683446	BB	BB	BB	BB	BB	BB	BB	BB	BB	BB	BB	BB	BB	BB	BB	BB	BB	BB	BB	BB	BB	BB	BB	BB	BB	BB	BB	BB	BB	BB	BB	BB	BB	BB	BB	BB	BB	BB	BB	BB	BB	BB	BB	BB	BB	BB	BB
mCV24625340	13	81332738	BB	BB	BB	BB	BB	BB	BB	BB	BB	BB	BB	BB	BB	BB	BB	BB	BB	BB	BB	AB	BB	BB	BB	AB	AB	AB	AA	BB	AB	AB	BB	AB	BB	BB	AB	AA	AA	AA	AA	BB	AB	BB	AA	AB	AA	BB	AB
rs3686443	13	83174585	AA	AA	AA	AA	AA	AA	AA	AA	AA	AA	AA	AA	AA	AA	AA	AA	AA	AA	AA	BB	AA	AA	AA	AA	AB	AB	BB	AB	AA	AB	AB	AB	AA	BB	BB	AB	AA	BB	BB	BB	BB	BB	AA	BB	AB	BB	AB
gnf13.088.732	13	84796434	BB	BB	BB	BB	BB	BB	BB	BB	BB	BB	BB	BB	BB	BB	BB	BB	BB	BB	BB	AB	BB	BB	BB	BB	BB	BB	BB	BB	BB	BB	BB	BB	BB	AB	AA	AA	BB	AB	AB	AA	AB	BB	BB	AB	AB	AB	AB
rs3655061	13	86241392	BB	BB	BB	BB	BB	BB	BB	BB	BB	BB	BB	BB	BB	BB	BB	BB	BB	BB	BB	AB	BB	BB	BB	BB	BB	BB	BB	BB	BB	BB	BB	BB	BB	BB	BB	BB	BB	AB	AB	BB	BB	BB	BB	BB	BB	BB	BB
rs6288319	13	87807463	AA	AA	AA	AA	AA	AA	AA	AA	AA	AA	AA	AA	AA	AA	AA	AA	AA	AA	AA	AB	AA	AA	AA	AB	AB	AB	AB	AB	AA	AA	AB	AB	AA	AA	AA	AA	AA	AA	AA	AA	AA	AA	AA	AA	AA	AA	AA
rs6316213	13	88817196	BB	BB	BB	BB	BB	BB	BB	BB	BB	BB	BB	BB	BB	BB	BB	BB	BB	BB	BB	BB	BB	BB	BB	BB	BB	BB	BB	BB	BB	BB	BB	BB	BB	BB	BB	BB	BB	BB	BB	BB	BB	BB	BB	BB	BB	BB	BB
gnf13.093.328	13	89447298	AA	AA	AA	AA	AA	AA	AA	AA	AA	AA	AA	AA	AA	AA	AA	AA	AA	AA	AA	AA	AA	AA	AA	AA	AA	AA	AA	AA	AA	AA	AA	AA	AA	BB	BB	BB	AA	AB	AB	BB	AB	BB	AA	BB	AB	BB	AA
rs13481961	13	94000606	AA	AA	AA	AA	AA	AA	AA	AA	AA	AA	AA	AA	AA	AA	AA	AA	AA	AA	AA	AA	AA	AA	AA	AA	AB	AB	AB	AA	AA	AA	AB	AB	AA	AA	AA	AA	BB	AB	AB	AA	BB	AA	BB	AA	AB	AA	BB
rs13481968	13	95596507	AA	AA	AA	AA	AA	AA	AA	AA	AA	AA	AA	AA	AA	AA	AA	AA	AA	AA	AA	AB	AA	AA	AA	AA	AA	AA	AB	AA	AA	AA	AA	AA	AA	AA	AA	AA	BB	AB	AB	AA	AB	AA	BB	AA	AB	AA	BB
rs4230027	13	97200857	BB	BB	BB	BB	BB	BB	BB	BB	BB	BB	BB	BB	BB	BB	BB	BB	BB	BB	BB	BB	BB	BB	BB	BB	BB	BB	BB	BB	BB	BB	BB	BB	BB	AB	BB	BB	BB	BB	BB	BB	BB	BB	BB	BB	BB	BB	BB
rs13481983	13	100181409	AA	AA	AA	AA	AA	AA	AA	AA	AA	AA	AA	AA	AA	AA	AA	AA	AA	AA	AA	AA	AA	AA	AA	AB	AA	AA	AA	AA	AA	AA	AA	AA	AA	AB	AA	AA	BB	AA	AA	AA	AA	AA	BB	AA	AB	AA	AB
rs6389588	13	100595006	AA	AA	AA	AA	AA	AA	AA	AA	AA	AA	AA	AA	AA	AA	AA	AA	AA	AA	AA	AB	AA	AA	AA	AB	AB	AB	AB	AB	AA	AA	AA	AB	AA	BB	BB	BB	BB	BB	BB	BB	BB	BB	BB	BB	BB	BB	BB
rs13481992	13	102442609	AA	AA	AA	AA	AA	AA	AA	AA	AA	AA	AA	AA	AA	AA	AA	AA	AA	AA	AA	AA	AA	AA	AA	AA	AB	AB	AA	AA	AB	AB	AA	AB	AA	AB	BB	AB	BB	AA	AA	BB	AA	AB	BB	AB	BB	BB	AB
rs13482005	13	105593959	AA	AA	AA	AA	AA	AA	AA	AA	AA	AA	AA	AA	AA	AA	AA	AA	AA	AA	AA	AB	AA	AA	AA	AA	AB	AB	AB	AB	AB	AB	AA	BB	AA	AB	BB	AB	BB	AA	AA	BB	AB	AB	BB	AB	BB	BB	AB
rs13482011	13	107432985	AA	AA	AA	AA	AA	AA	AA	AA	AA	AA	AA	AA	AA	AA	AA	AA	AA	AA	AA	AA	AA	AA	AA	AA	AA	AA	AA	AA	AA	AA	AA	AA	AA	AA	AA	AA	AA	AA	AA	AA	AA	AA	AA	AA	AA	AA	AA
rs13482019	13	109707882	BB	BB	BB	BB	BB	BB	BB	BB	BB	BB	BB	BB	BB	BB	BB	BB	BB	BB	BB	AA	BB	BB	BB	AB	BB	BB	AB	AA	AB	AB	BB	AB	BB	BB	BB	BB	BB	BB	BB	BB	BB	BB	BB	BB	BB	BB	BB
gnf13.115.241	13	110861665	AB	AA	AA	AA	AA	AA	AA	AA	AA	AA	AA	AA	AA	AA	AA	AB	AA	AA	AA	AA	AA	AA	AA	AA	AA	AA	AA	AA	AA	AA	AA	AA	AA	AA	AA	AA	AA	AA	AA	AA	AA	AA	AA	AA	AA	AA	AA
rs6247696	13	112118515	AA	AA	AA	AA	AA	AA	AA	AA	AA	AA	AA	AA	AA	AA	AA	AA	AA	AA	AA	AB	AA	AA	AA	AB	AA	AA	AA	AB	AA	AA	AA	AA	AA	AA	AA	AB	AB	AA	AA	AA	AA	AA	AB	AA	AB	AA	AB
rs13482028	13	113209165	BB	BB	BB	BB	BB	BB	BB	BB	BB	BB	BB	BB	BB	BB	BB	BB	BB	BB	BB	AB	BB	BB	BB	BB	BB	BB	BB	AB	BB	AB	BB	BB	BB	BB	BB	BB	BB	BB	BB	BB	BB	BB	BB	BB	BB	BB	BB
rs4230144	14	3890426	BB	BB	BB	BB	BB	BB	BB	BB	BB	BB	BB	BB	BB	BB	BB	BB	BB	BB	BB	BB	BB	BB	BB	BB	BB	BB	BB	BB	BB	BB	BB	BB	BB	AB	AB	AB	AB	AB	AA	AB	AB	BB	AB	BB	BB	AB	AB
rs6322899	14	5945767	BB	BB	BB	BB	BB	BB	BB	BB	BB	BB	BB	BB	BB	BB	BB	BB	BB	BB	BB	BB	BB	BB	BB	BB	BB	BB	BB	BB	BB	BB	BB	BB	BB	BB	BB	BB	BB	BB	BB	BB	BB	AB	BB	AB	BB	AB	BB
rs13482084	14	8848582	BB	BB	BB	BB	BB	BB	BB	BB	BB	BB	BB	BB	BB	BB	BB	BB	BB	BB	BB	BB	BB	BB	BB	BB	BB	BB	BB	BB	BB	BB	BB	BB	BB	BB	BB	BB	BB	BB	BB	BB	BB	BB	BB	BB	BB	BB	BB
rs6290836	14	9149500	BB	BB	BB	BB	BB	BB	BB	BB	BB	BB	BB	BB	BB	BB	BB	BB	BB	BB	BB	AB	BB	BB	BB	AA	AB	AB	AB	AA	AB	AA	AB	AB	AA	AB	AA	BB	AA	AB	AB	AB	AA	AA	BB	AB	AA	AB	AB
rs3719629	14	12874743	AA	AA	AA	AA	AA	AA	AA	AA	AA	AA	AA	AA	AA	AA	AA	AA	AA	AA	AA	AA	AA	AA	AA	BB	AB	AA	AA	BB	AB	BB	AB	AA	AB	BB	BB	BB	BB	BB	BB	BB	BB	BB	BB	BB	BB	BB	BB
rs3696385	14	14028895	AA	AA	AA	AA	AA	AA	AA	AA	AA	AA	AA	AA	AA	AA	AA	AA	AA	AA	AA	AA	AA	AA	AA	BB	AB	AA	AA	BB	AB	AB	AB	AA	AB	AB	AB	AA	AB	AA	AA	AB	AB	AB	AB	AA	BB	AA	AA
rs3687889	14	15973497	BB	BB	BB	BB	BB	BB	BB	BB	BB	BB	BB	BB	BB	BB	BB	BB	BB	BB	BB	BB	BB	BB	BB	BB	BB	BB	BB	BB	BB	BB	BB	BB	BB	BB	BB	BB	BB	BB	BB	BB	BB	BB	BB	BB	BB	BB	BB
rs13482096	14	19006267	AA	AA	AA	AA	AA	AA	AA	AA	AA	AA	AA	AA	AA	AA	AA	AA	AA	AA	AA	AA	AA	AA	AA	AA	AA	AA	AA	AA	AA	AA	AA	AA	AA	AB	AA	AB	AB	AB	AB	AB	AA	AA	BB	AA	AA	AB	AB
rs3692121	14	20092583	BB	BB	BB	BB	BB	BB	BB	BB	BB	BB	BB	BB	BB	BB	BB	BB	BB	BB	BB	BB	BB	BB	BB	BB	BB	BB	BB	BB	BB	BB	BB	BB	BB	BB	BB	BB	BB	BB	BB	BB	BB	BB	BB	BB	BB	BB	BB
rs13482104	14	22364262	BB	BB	BB	BB	BB	BB	BB	BB	BB	BB	BB	BB	BB	BB	BB	BB	BB	BB	BB	BB	BB	BB	BB	BB	BB	BB	BB	BB	BB	AB	BB	BB	BB	BB	BB	BB	BB	BB	BB	BB	BB	AB	BB	AB	BB	AB	BB
rs6396829	14	24042337	AB	AB	AB	BB	AB	AA	AB	AA	AB	AA	BB	AA	AB	BB	AA	AB	AA	AB	AA	BB	AB	AB	AB	AA	AB	AB	BB	AA	AA	AB	AB	BB	BB	AB	AA	AB	AB	AB	AB	AB	AA	AB	AB	AB	AA	BB	AB
rs4230248	14	27218513	AA	AA	AA	AA	AA	AA	AA	AA	AA	AA	AA	AA	AA	AA	AA	AA	AA	AA	AA	AB	AA	AA	AA	AA	AA	AB	AB	AA	AA	AA	AA	AB	AB	AA	AA	AA	AA	AA	AA	AA	AA	AA	AA	AA	AA	AA	AA
rs6313230	14	28306368	BB	BB	BB	BB	BB	BB	BB	BB	BB	BB	BB	BB	BB	BB	BB	BB	BB	BB	BB	AB	BB	BB	BB	BB	BB	AB	AB	BB	BB	AB	BB	AB	AB	AA	AA	AA	AA	AA	AA	AA	AA	AA	AA	AA	AA	AA	AA
rs3695383	14	29838823	AA	AA	AA	AA	AA	AA	AA	AA	AA	AA	AA	AA	AA	AA	AA	AA	AA	AA	AA	AB	AA	AA	AA	AA	AA	AB	AB	AA	AA	AA	AA	AB	AB	AB	AA	BB	AB	AB	BB	AB	AB	AB	AB	BB	AA	BB	BB
rs13482135	14	31429298	AB	AB	AB	AA	AB	BB	BB	BB	AB	BB	AA	BB	AB	AA	BB	AB	AB	AB	BB	AA	AB	AB	AB	BB	AB	AB	AB	AB	AB	AA	AB	AA	AA	AB	BB	AA	AB	AB	AA	AB	AB	AB	AB	AA	BB	AA	AA
rs3701775	14	33391532	BB	BB	BB	BB	BB	BB	BB	BB	BB	BB	BB	BB	BB	BB	BB	BB	BB	BB	BB	BB	BB	BB	BB	BB	BB	BB	BB	BB	BB	BB	BB	BB	BB	BB	BB	BB	BB	BB	BB	BB	BB	BB	BB	BB	BB	BB	BB
rs13482143	14	35609633	AA	AB	AA	AA	AA	AB	AA	AA	AB	AA	AA	AB	AA	AA	AA	AA	AA	AA	AA	AA	AA	AA	AB	AA	AB	AA	AB	AB	AA	AA	AA	AA	AA	AA	AA	AA	AA	AB	AA	AA	AB	AA	AA	AA	AA	AA	AA
rs13482148	14	37242020	AA	AA	AA	AA	AA	AA	AA	AA	AA	AA	AA	AA	AA	AA	AA	AA	AA	AA	AA	AA	AA	AA	AA	AA	AA	AA	AA	AA	AA	AA	AA	AA	AA	AA	AA	AA	AA	AA	AA	AA	AA	AA	AA	AA	AA	AA	AA
rs13482159	14	38359897	BB	BB	BB	BB	BB	BB	BB	BB	BB	BB	BB	BB	BB	BB	BB	BB	BB	BB	BB	BB	BB	BB	BB	BB	BB	BB	BB	BB	BB	BB	BB	BB	BB	BB	BB	BB	BB	BB	BB	BB	BB	BB	BB	BB	BB	BB	BB
rs13482170	14	41201261	AB	AB	AB	AA	AA	BB	BB	BB	AB	BB	AA	BB	AB	AA	BB	AB	AB	AB	BB	AA	AB	AB	AB	AB	AA	AB	AA	AB	AB	AB	AB	AA	AA	AA	AB	AB	AA	AA	AA	AA	AA	AB	AA	AB	AA	AB	AA
mCV24777660	14	42906842	AA	AA	AA	BB	BB	AA	AA	AA	AA	AA	BB	AA	AA	BB	AA	AA	AA	AA	AA	BB	AA	AA	AA	AB	BB	AB	BB	BB	AB	BB	AB	BB	BB	BB	BB	BB	BB	BB	BB	BB	AB	AB	AB	AB	BB	AB	BB
rs13482191	14	46619173	AB	AB	AB	BB	BB	AA	AA	AA	AB	AA	BB	AA	AB	BB	AA	AB	AB	AB	AA	AA	AB	AB	AB	AB	AA	AA	AA	BB	AB	BB	AA	AA	AB	AA	AA	AB	AA	AA	AA	AA	AA	AB	AA	AB	AA	AB	AA
rs13482193	14	47596815	BB	AB	BB	BB	AB	AB	AB	BB	AA	BB	BB	AB	BB	BB	BB	BB	BB	AB	BB	AA	BB	AB	AB	AB	AA	AB	AA	BB	BB	AB	AB	AA	AB	AA	AA	AB	AA	AB	AA	AA	AB	AB	AA	BB	AA	AB	AA
rs13482194	14	47801247	BB	BB	BB	BB	BB	BB	BB	BB	BB	BB	BB	BB	BB	BB	BB	BB	BB	BB	BB	BB	BB	BB	BB	BB	BB	BB	BB	BB	BB	BB	BB	BB	BB	BB	BB	BB	BB	BB	BB	BB	BB	BB	BB	BB	BB	BB	BB
rs3692863	14	50807707	AB	BB	AB	AA	AB	BB	BB	BB	BB	BB	AA	BB	AB	AB	BB	BB	BB	BB	BB	BB	BB	AB	AB	AB	BB	BB	BB	AB	AB	AB	BB	BB	AB	BB	BB	BB	BB	BB	BB	BB	BB	BB	BB	BB	BB	BB	BB
gnf14.055.608	14	52829293	BB	AB	BB	BB	AB	AB	AB	BB	AA	BB	BB	AB	BB	BB	BB	AB	BB	AB	BB	AA	BB	AB	AB	AB	AA	AB	AA	BB	BB	BB	AB	AA	AA	AB	AB	AB	AB	BB	AB	AB	AB	AA	AB	AB	AA	AB	AB
rs13482216	14	53885592	BB	BB	BB	BB	BB	BB	BB	BB	BB	BB	BB	BB	BB	BB	BB	BB	BB	BB	BB	BB	BB	BB	BB	BB	BB	BB	BB	BB	BB	BB	BB	BB	BB	AB	AB	AB	BB	AB	AB	AB	BB	BB	AB	BB	BB	AB	AB
rs3703075	14	54913181	AB	BB	AB	AA	AB	BB	BB	BB	BB	BB	AA	AB	AB	AB	BB	BB	BB	BB	BB	BB	BB	AB	AB	BB	BB	BB	BB	AB	AB	AA	BB	BB	BB	BB	BB	AB	BB	AB	BB	BB	AB	AB	BB	AB	BB	AB	BB
rs13482231	14	58969551	AB	AB	AB	BB	BB	AB	AB	AA	BB	AA	BB	AB	AB	AB	AA	AB	AA	AB	AA	AA	AA	BB	BB	AB	BB	AA	AB	BB	AB	BB	AB	AB	BB	BB	BB	BB	BB	BB	BB	BB	BB	BB	BB	BB	BB	BB	BB
rs3672425	14	60335045	AB	BB	AB	AA	AB	BB	BB	BB	BB	BB	AA	AB	AB	AB	BB	BB	BB	BB	BB	AA	BB	AB	AB	AA	AB	AB	AA	AB	AB	AA	AB	AA	AB	AB	AB	BB	AB	AA	AB	AA	AB	BB	BB	BB	BB	AB	AB
rs13482239	14	61543475	AA	AA	AA	AA	AA	AA	AA	AA	AA	AA	AA	AA	AA	AA	AA	AA	AA	AA	AA	AA	AA	AA	AA	AA	AA	AA	AA	AA	AA	AA	AA	AA	AA	AA	AA	AA	AA	AA	AA	AA	AA	AA	AA	AA	AA	AA	AA
rs13482247	14	63674408	AB	AB	AB	BB	AB	AB	AB	AA	BB	AA	BB	AB	AA	AB	AA	AB	AA	AB	AA	BB	AA	BB	AB	AB	AA	AB	AB	BB	AB	BB	BB	AB	BB	AB	AB	AB	AA	AA	AA	AA	AA	AB	BB	AB	BB	AA	AA
rs6156908	14	66473686	BB	BB	BB	BB	BB	BB	BB	BB	BB	BB	BB	BB	BB	BB	BB	BB	BB	BB	BB	BB	BB	BB	BB	BB	BB	BB	BB	BB	BB	BB	BB	BB	BB	BB	BB	BB	BB	BB	BB	BB	BB	BB	BB	BB	BB	BB	BB
rs13459144	14	67681669	AA	AA	AA	AA	AA	AA	AA	AA	AA	AA	AA	AA	AA	AA	AA	AA	AA	AA	AA	BB	AA	AA	AA	AB	AB	AB	AB	AB	AA	AB	AA	AB	AA	AB	AB	AA	BB	AB	AB	BB	AA	AB	AA	AB	AA	BB	AB
rs13482265	14	70793464	AB	AB	AB	BB	AB	AB	AB	AA	BB	AA	BB	AB	AA	AB	AB	AB	AA	AB	AA	BB	AA	BB	AB	AB	AB	AB	AB	AB	AB	AB	BB	BB	BB	AB	AB	BB	AB	AA	AB	AA	AB	AB	AB	AA	BB	AA	AB
rs3023413	14	71540901	AB	AB	AB	AA	AB	AB	AB	BB	AA	BB	AA	AB	BB	AB	AB	AB	BB	AB	BB	BB	BB	AA	AB	AB	BB	BB	BB	AA	AB	AB	AA	AB	AA	AA	AA	AA	AA	AA	AA	AA	AA	AA	AA	AA	AA	AA	AA
CEL-14_73162771	14	73162771	AB	AA	AA	BB	AA	AA	AA	AA	AA	AA	AA	AB	AA	AB	AA	AA	AA	AA	AA	AA	AA	BB	AA	AA	AA	AA	AA	AA	AA	AA	AA	AA	AA	AA	AA	AA	AA	AA	AA	AA	AA	AA	AA	AA	AA	AA	AA
rs6319148	14	75261976	AB	AA	AA	BB	AA	AA	AA	AA	AA	AA	AA	AB	AA	AB	AA	AA	AA	AA	AA	AA	AA	BB	AA	AA	AB	AA	AB	AB	AA	AB	AA	AA	AA	AA	AB	AA	AB	AB	AB	AB	AA	AA	AA	AA	AA	AB	AB
rs3708535	14	78686463	BB	AB	AB	BB	BB	AB	AB	BB	AB	BB	AA	BB	BB	BB	AB	AB	BB	BB	BB	AA	AB	BB	AB	AB	AB	AB	AB	AB	AB	AB	AA	AA	AA	BB	BB	BB	BB	BB	BB	BB	BB	BB	BB	BB	BB	BB	BB
rs13482296	14	80784363	AA	AA	AA	AA	AA	AA	AA	AA	AA	AA	AA	AA	AA	AA	AA	AA	AA	AA	AA	AA	AA	AA	AA	AA	AA	AA	AA	AA	AA	AA	AA	AA	AA	AA	AA	AA	AA	AA	AA	AA	AA	AA	AA	AA	AA	AA	AA
rs3692362	14	92002849	AB	AA	AB	BB	AA	AB	AB	AA	AB	AA	BB	AA	AA	AB	AA	AB	AA	AA	AA	BB	AA	AA	AA	AB	AB	AB	BB	AB	AB	AB	BB	AA	BB	BB	AA	AB	AA	AA	AB	AB	AB	AB	AB	AA	AB	AA	AB
rs6191117	14	92434091	BB	BB	BB	BB	BB	BB	BB	AB	BB	AB	BB	BB	BB	BB	BB	BB	BB	AB	BB	BB	BB	AA	BB	AB	BB	BB	BB	BB	BB	AB	BB	BB	BB	AB	BB	AB	AB	BB	AB	BB	AB	AB	AB	BB	AB	BB	AB
rs13482354	14	98188914	AB	BB	BB	BB	BB	BB	BB	BB	BB	BB	BB	BB	BB	BB	BB	BB	BB	BB	BB	BB	BB	BB	BB	AB	AA	BB	AB	AB	AB	AA	AA	AB	AA	AB	BB	BB	BB	BB	BB	AB	BB	BB	BB	BB	BB	BB	BB
rs3654132	14	98578208	AB	BB	AB	AA	BB	AB	BB	BB	AB	AB	AA	BB	BB	AB	BB	AB	BB	AB	BB	AA	BB	AA	BB	AB	AA	AB	AA	AB	AB	AA	AA	AB	AA	AB	BB	BB	AB	BB	BB	AB	BB	BB	BB	BB	BB	BB	BB
rs13482356	14	99047545	BB	BB	AB	AA	BB	AB	BB	BB	AB	AB	AA	BB	BB	AB	BB	AB	BB	AB	BB	AA	BB	AA	BB	AA	BB	AB	AB	BB	BB	BB	BB	BB	BB	AB	AA	AA	AB	AA	AA	AB	AA	AA	AA	AA	AA	AA	AA
gnf14.103.048	14	99774290	AA	AA	AA	AA	AA	AA	AA	AA	AA	AA	AA	AA	AA	AA	AA	AA	AA	AA	AA	AA	AA	AA	AA	AB	AA	AA	AA	AA	AA	AA	AA	AA	AA	AA	AA	AA	AA	AA	AA	AA	AA	AA	AA	AA	AA	AA	AA
rs3708779	14	103068000	AB	BB	BB	BB	BB	BB	BB	BB	BB	BB	BB	BB	BB	BB	BB	AB	BB	BB	BB	AB	BB	BB	BB	AB	BB	BB	BB	AB	BB	BB	BB	AB	BB	BB	BB	AB	BB	AB	BB	BB	AB	BB	AB	AB	AB	BB	BB
rs13482375	14	103981340	AB	AA	AB	AB	AA	AB	AA	AA	AB	AB	BB	AA	AA	AB	AA	AB	AA	AB	AA	BB	AA	BB	AA	AB	BB	AB	BB	BB	AB	BB	BB	BB	BB	AB	AA	AB	AA	AB	AA	AB	AB	AA	AA	AA	AB	AA	AA
rs3726052	14	104244696	AB	AA	AA	AA	AA	AA	AA	AA	AA	AA	AA	AA	AA	AA	AA	AA	AA	AA	AA	AB	AA	AA	AA	AA	BB	AB	BB	AB	AB	AB	BB	AB	BB	AA	BB	AA	BB	AB	AB	AB	AA	AA	AA	AA	AA	AB	AB
rs6256423	14	106108556	BB	BB	BB	BB	BB	BB	BB	BB	BB	BB	BB	BB	BB	BB	BB	BB	BB	BB	BB	BB	BB	BB	BB	AB	BB	BB	BB	BB	BB	AB	BB	BB	BB	BB	BB	BB	BB	BB	BB	BB	BB	BB	BB	BB	BB	BB	BB
rs3665550	14	111354233	BB	BB	BB	BB	BB	BB	BB	BB	BB	BB	BB	BB	BB	BB	BB	BB	BB	BB	BB	BB	BB	BB	BB	AB	BB	BB	BB	BB	BB	BB	BB	BB	BB	BB	BB	BB	BB	BB	AB	BB	BB	BB	AB	AB	BB	BB	BB
rs13482398	14	112310948	BB	BB	BB	AB	AB	AA	AB	BB	AB	AB	BB	AB	BB	AB	AB	AA	AB	AB	BB	BB	BB	AA	AB	BB	BB	BB	BB	BB	BB	AB	BB	BB	BB	AB	AA	AA	AB	AA	AA	AB	AA	AA	AA	AA	AA	AA	AA
rs13482407	14	114388484	BB	BB	BB	BB	BB	BB	BB	BB	BB	BB	BB	BB	BB	BB	BB	BB	BB	BB	BB	AB	BB	BB	BB	BB	BB	AB	BB	BB	BB	BB	BB	BB	BB	BB	BB	BB	BB	BB	BB	BB	BB	BB	BB	BB	BB	BB	BB
rs13459176	15	3104758	AA	AA	AA	AB	AB	AA	AA	AA	AA	AA	AA	AA	AA	AA	AB	AB	AA	AA	AA	AA	AA	AB	AA	AB	AA	AA	AA	AA	AA	AA	AB	AA	AB	AB	AA	AB	BB	AB	AB	AA	AA	AA	BB	AB	AB	AB	AB
rs13482418	15	3498960	AA	AA	AB	AB	BB	AB	AB	AA	BB	AB	AB	AB	AA	AA	AB	AB	AB	AB	AB	BB	AB	AB	AA	AB	AB	AA	AB	BB	AA	BB	BB	AA	AB	AA	AA	BB	AA	AB	AB	AA	AB	AB	AB	BB	BB	AA	AB
CEL-15_4222769	15	4222769	BB	BB	BB	BB	BB	BB	BB	BB	BB	BB	BB	BB	BB	BB	BB	BB	BB	BB	BB	BB	BB	BB	BB	BB	BB	BB	BB	BB	BB	AB	BB	BB	BB	BB	BB	BB	BB	BB	BB	BB	BB	BB	BB	BB	BB	BB	BB
rs3665826	15	5744460	AA	AA	AA	AB	AB	AA	AA	AA	AA	AA	AA	AA	AA	AA	AB	AB	AA	AA	AA	AA	AA	AB	AA	AB	AA	AA	AA	AA	AA	AA	AA	AA	AB	AB	AB	AA	AA	AA	AA	AB	AA	AA	AA	AA	AA	AA	AA
CEL-15_8331158	15	8331158	BB	BB	BB	BB	BB	BB	BB	BB	BB	BB	BB	BB	BB	BB	BB	BB	BB	BB	BB	BB	BB	BB	BB	BB	BB	BB	BB	BB	BB	BB	BB	BB	BB	BB	BB	BB	BB	BB	BB	BB	BB	BB	BB	BB	BB	BB	BB
rs3711814	15	13122871	AA	AA	AB	AA	AB	AB	AB	AA	BB	AB	AB	AB	AA	AA	AA	AA	AB	AB	AB	BB	AB	AA	AA	BB	BB	AB	BB	BB	AA	BB	BB	AB	AA	AA	AB	AB	AA	AB	AB	AB	AA	AB	AB	AB	AA	AB	AB
CEL-15_14786403	15	14786403	AA	AA	AB	AB	BB	AB	AB	AA	BB	AB	AB	AB	AA	AA	AB	AB	AB	AB	AB	BB	AB	BB	AA	BB	BB	AB	BB	BB	AA	BB	BB	AB	AB	BB	BB	BB	BB	BB	BB	BB	BB	BB	BB	BB	BB	BB	BB
CEL-15_15482356	15	15482356	BB	BB	AB	BB	AB	AB	AB	BB	AA	AB	AB	AB	BB	BB	BB	BB	AB	AB	AB	AA	AB	BB	BB	AA	BB	BB	AA	AB	BB	AB	AB	BB	BB	AA	AA	AB	AA	AB	AB	AA	AA	AB	AB	AB	AA	AB	AB
rs13482455	15	16643375	BB	BB	BB	BB	BB	BB	BB	BB	BB	BB	BB	BB	BB	BB	BB	BB	BB	BB	BB	BB	BB	BB	BB	AB	BB	BB	BB	BB	BB	AB	AB	BB	BB	BB	BB	AB	BB	AA	AB	BB	AB	AB	AB	AB	BB	BB	AA
rs3715857	15	19261351	AA	AA	AA	AA	AA	AA	AA	AA	AA	AA	AA	AA	AA	AA	AA	AA	AA	AA	AA	AA	AA	AA	AA	AB	AA	AA	AA	AA	AA	AA	AA	AA	AA	AA	AA	AA	AA	AA	AA	AA	AA	AA	AA	AA	AA	AA	AA
rs13482469	15	20978602	AA	AA	AA	AA	AB	AA	AA	AA	AA	AA	AA	AA	AA	AA	AB	AB	AA	AA	AA	BB	AA	BB	AA	AA	AB	AA	AB	AB	AA	AB	AA	AA	AB	AB	AB	AB	AA	AA	AB	AB	AB	BB	AA	AB	BB	AB	AA
rs13482477	15	22545113	AA	AA	AB	AA	AB	AB	AB	AA	BB	AB	AB	AB	AA	AA	AA	AA	AB	AB	AA	AA	AB	AA	AA	AA	AB	AB	AB	AB	AA	AB	AB	AB	AA	AA	AA	AA	AA	AA	AA	AA	AA	AA	AA	AA	AA	AA	AA
rs13482482	15	24640823	AA	AA	AA	AA	AA	AA	AA	AA	AA	AA	AA	AA	AA	AA	AA	AA	AA	AA	AA	AA	AA	AA	AA	AA	AA	AA	AA	AA	AA	AA	AA	AA	AA	AA	AA	AA	AA	AA	AA	AA	AA	AA	AA	AA	AA	AA	AA
rs13482485	15	25491892	BB	BB	BB	BB	BB	BB	BB	BB	BB	BB	BB	BB	BB	BB	BB	BB	BB	BB	BB	AA	BB	BB	BB	AB	BB	BB	AB	BB	BB	BB	BB	BB	BB	AB	AB	AB	AA	AA	AB	AB	AB	BB	AA	AB	BB	AB	AA
rs13482497	15	28363926	BB	BB	BB	BB	BB	BB	BB	BB	BB	BB	BB	BB	BB	BB	BB	BB	BB	BB	BB	BB	BB	BB	BB	BB	BB	BB	BB	BB	BB	BB	BB	BB	BB	BB	BB	BB	BB	BB	BB	BB	BB	BB	BB	BB	BB	BB	BB
rs13482501	15	29311563	AA	AA	AB	AA	BB	AB	AA	AA	BB	AA	AB	AB	AB	AB	AB	AB	AA	AA	AA	AB	AB	BB	AA	AA	AB	AB	BB	AB	AA	AB	BB	AB	AB	AA	AA	AB	AA	BB	AB	AA	AB	AA	AB	AB	AA	AA	BB
rs13482504	15	30361234	BB	BB	AB	BB	AA	AB	BB	BB	AA	BB	AB	AB	AB	AB	AB	AB	BB	BB	BB	AB	AB	AA	BB	AA	AB	AB	AB	AB	BB	AA	AB	AB	AB	AA	AA	AA	AA	AA	AA	AA	AA	AA	AA	AA	AA	AA	AA
rs13482509	15	32096277	BB	BB	BB	BB	AB	BB	BB	BB	BB	BB	BB	BB	AB	BB	AB	AB	BB	BB	BB	BB	BB	AA	BB	BB	AB	BB	BB	AB	BB	AB	AB	BB	AB	AB	AB	AB	AB	BB	AB	AB	AB	AB	BB	AB	AA	AB	BB
rs6188239	15	34383985	BB	BB	AB	AB	AB	AB	BB	BB	AA	BB	AB	AB	BB	BB	BB	BB	BB	BB	BB	AB	AB	BB	BB	AB	AB	AB	AA	AB	BB	BB	AA	AB	BB	AB	AB	AB	AB	BB	AB	AB	AB	AB	BB	AB	AA	AB	BB
CEL-15_36490596	15	36490596	BB	BB	BB	BB	AB	BB	BB	BB	BB	BB	BB	BB	AB	BB	AB	AB	BB	BB	BB	AB	BB	AA	BB	BB	BB	BB	AB	BB	BB	BB	BB	BB	AB	AA	AA	AB	AA	AB	AB	AA	AA	AA	AB	AB	AA	AA	AB
rs3695416	15	38562542	AA	AA	AB	AB	AB	AB	AA	AA	BB	AA	AB	AB	AA	AA	AA	AA	AA	AA	AA	AA	AB	AA	AA	AB	BB	AB	AB	BB	AA	AA	AB	AB	AA	BB	BB	AB	BB	AA	AB	BB	AB	AB	AB	AB	BB	BB	AA
rs13482529	15	39096937	AA	AA	AA	AA	AA	AA	AB	AA	AA	AA	AA	AA	AA	AB	AA	AB	AA	AA	AA	AB	AA	AA	AA	AA	AA	AA	AB	AA	AA	AA	AB	AA	AA	AA	AA	AB	AA	AB	AB	AA	AA	AA	AB	AB	AA	AA	AB
rs3683326	15	41359817	BB	BB	BB	BB	BB	BB	BB	BB	BB	BB	BB	BB	BB	BB	BB	BB	BB	BB	BB	BB	BB	BB	BB	BB	BB	BB	BB	BB	BB	BB	AB	BB	BB	BB	BB	BB	BB	BB	BB	BB	BB	BB	BB	BB	BB	BB	BB
CEL-15_43206205	15	43206205	AA	AA	AB	AB	BB	AB	AA	AA	BB	AA	AB	AB	AB	AA	AB	AB	AA	AA	AA	BB	AB	AB	AA	BB	BB	AB	BB	BB	AA	AA	BB	AB	AB	BB	BB	BB	BB	BB	BB	BB	BB	BB	BB	BB	BB	BB	BB
rs13482543	15	43892080	BB	BB	AB	AB	AA	AB	BB	BB	AA	BB	AB	AB	AB	BB	AB	AB	BB	BB	BB	AB	AB	AB	BB	AA	AB	AB	AB	AB	BB	AB	AA	AB	AB	BB	BB	BB	BB	AB	BB	BB	AB	AB	BB	BB	BB	BB	AB
rs13482549	15	45665306	AA	AA	AA	AA	AB	AA	AA	AA	AA	AA	AA	AA	AB	AA	AB	AB	AA	AA	AA	BB	AA	AB	AA	AB	AB	AA	AB	AB	AA	AA	AB	AA	AB	BB	BB	BB	BB	BB	BB	BB	BB	BB	BB	BB	BB	BB	BB
rs13482558	15	47188758	AA	AA	AB	AB	BB	AB	AA	AA	BB	AA	AB	AB	AB	AA	AB	AB	AA	AA	AA	AB	AB	AB	AA	BB	AB	AB	AB	AB	AA	AB	AB	AB	AB	BB	BB	BB	BB	BB	BB	BB	BB	BB	BB	BB	BB	BB	BB
rs13482571	15	50021404	AA	AA	AA	AA	AA	AA	AA	AA	AA	AA	AA	AA	AA	AA	AA	AA	AA	AA	AA	AA	AA	AA	AA	AA	AA	AA	AA	AA	AA	AA	AA	AA	AA	AA	AB	AB	AA	AB	AB	AB	AA	AB	AA	BB	AA	AB	AB
rs3658705	15	51403508	BB	BB	BB	BB	AB	BB	BB	BB	BB	BB	BB	BB	AB	BB	AB	AB	BB	BB	BB	AA	BB	AB	BB	AB	AB	BB	AB	AB	BB	BB	AB	BB	AB	BB	BB	BB	BB	BB	BB	BB	BB	BB	BB	BB	BB	BB	BB
rs3707900	15	52526197	BB	BB	BB	BB	BB	BB	BB	BB	BB	BB	BB	BB	BB	BB	BB	BB	BB	BB	BB	BB	BB	BB	BB	BB	AB	BB	BB	AB	BB	BB	AB	BB	BB	BB	AB	AB	BB	AB	AB	AB	BB	AB	BB	AA	BB	AB	AB
rs13482585	15	54079758	BB	BB	AB	BB	AB	AB	BB	AB	AA	BB	AB	AB	BB	BB	BB	BB	BB	BB	BB	BB	AB	BB	BB	AB	AA	AB	AB	AA	BB	AB	AA	AB	BB	AB	AB	AB	AB	AA	AB	AB	AB	AA	AA	AA	BB	AA	AA
rs6400804	15	56998500	AA	AA	AB	AB	BB	AB	AA	AB	BB	AA	AB	AB	AB	AA	AB	AB	AA	AA	AA	BB	AB	AB	AA	BB	BB	AB	BB	BB	AA	BB	BB	AB	AB	BB	BB	BB	BB	BB	BB	BB	BB	BB	BB	BB	BB	BB	BB
rs13482595	15	58814425	AA	AA	AA	AA	AB	AA	AA	AA	AA	AA	AA	AA	AB	AA	AB	AB	AA	AA	AA	AA	AA	AB	AA	AA	AB	AA	AB	AB	AA	AA	AB	AA	AB	AA	AA	AA	AA	AA	AA	AA	AA	AA	AA	AA	AA	AA	AA
rs3683495	15	61406689	AA	AA	AB	AB	BB	AB	AA	AB	BB	AA	AB	AB	AB	AA	AB	AB	AA	AA	AA	AB	AB	AB	AA	AB	BB	AB	AB	AB	AA	AB	AB	AB	BB	AA	AA	AA	AA	AA	AA	AA	AA	AA	AA	AA	AA	AA	AA
rs13482602	15	61631955	AA	AA	AB	AB	AB	AB	AA	AB	BB	AA	AB	AB	AA	AA	AA	AA	AA	AA	AA	AA	AB	AA	AA	AB	AB	AB	AA	AA	AA	AB	AA	AB	AA	AA	AA	AA	AA	AA	AA	AA	AA	AA	AA	AA	AA	AA	AA
rs6381737	15	65856370	AA	AA	AB	AB	BB	AB	AA	AB	BB	AA	AB	AB	AB	AA	AB	AB	AA	AA	AA	BB	AB	AB	AA	BB	BB	AB	BB	BB	AA	BB	BB	AB	BB	BB	BB	BB	BB	BB	BB	BB	BB	BB	BB	BB	BB	BB	BB
rs13482628	15	68143270	AA	AB	AB	AB	BB	AB	AA	BB	BB	AB	BB	AB	AB	AB	AA	AA	AA	AB	AA	BB	AB	BB	BB	BB	AB	AA	BB	BB	AA	AB	AB	AA	BB	AB	AA	AA	AB	AA	AA	AA	AA	AA	BB	AA	AA	AB	AA
rs13482629	15	68448503	AA	AB	AB	AB	BB	AB	AA	BB	BB	AB	BB	AB	AB	AB	AA	AA	AA	AB	AA	AB	AB	BB	BB	BB	AB	AA	BB	BB	AA	BB	BB	AA	BB	BB	BB	BB	BB	BB	BB	BB	BB	BB	BB	BB	BB	BB	BB
rs13482637	15	70770335	BB	AB	AB	AA	AA	BB	AB	AA	AB	AB	AA	AB	AB	AB	BB	BB	BB	AB	BB	AA	AB	AA	AA	AA	AB	BB	AA	AA	BB	AB	AB	BB	AA	BB	BB	BB	BB	AB	AB	BB	AB	AA	BB	AB	BB	AB	AA
rs13482642	15	72483350	BB	AB	AB	AA	AA	BB	AB	AA	AB	AB	AA	AB	AB	AB	BB	BB	BB	AB	AB	AB	AB	AA	AA	AA	AB	BB	AA	AA	BB	AB	AA	AB	AA	AA	AA	AA	AA	AA	AA	AA	AA	AA	AA	AA	AA	AA	AA
rs3660192	15	78151819	BB	BB	BB	BB	BB	BB	BB	BB	BB	BB	BB	BB	BB	BB	BB	BB	BB	BB	BB	AB	BB	BB	BB	BB	BB	BB	BB	BB	BB	BB	BB	BB	BB	BB	BB	BB	BB	BB	BB	BB	BB	BB	BB	BB	BB	BB	BB
rs13482661	15	79085767	AA	AA	AB	BB	BB	AA	AB	BB	AB	AB	AB	AB	AB	AB	AB	AA	AA	AB	BB	AA	BB	AB	AB	AB	AA	AA	AA	AA	AA	AB	AB	AA	AA	AA	AA	AA	AA	AA	AA	AA	AA	AA	AA	AA	AA	AA	AA
rs3665030	15	79719777	AA	AA	AB	BB	BB	AA	AB	BB	AB	AB	AB	AB	AB	AB	AB	AA	AA	AB	BB	AA	BB	AB	AB	AB	AA	AA	AB	AB	AA	BB	AB	AA	AA	AB	AB	AA	AB	AB	AB	AB	AB	BB	BB	AB	AA	BB	BB
rs6276391	15	82164497	AA	AA	BB	BB	BB	BB	AB	BB	BB	AB	AB	AB	AB	AB	AB	AA	AA	AB	BB	AB	BB	AB	AB	BB	AB	AA	AB	BB	AA	BB	BB	BB	BB	BB	BB	BB	BB	BB	BB	BB	BB	BB	BB	BB	BB	BB	BB
rs13482673	15	82560799	BB	BB	BB	BB	BB	BB	BB	BB	BB	BB	BB	BB	BB	BB	BB	BB	BB	BB	BB	AB	BB	BB	BB	AB	AB	BB	BB	AB	BB	BB	AB	AA	AA	BB	BB	BB	BB	BB	BB	BB	BB	BB	BB	BB	BB	BB	BB
rs3660367	15	85057715	BB	BB	AA	AA	AA	AA	AB	AA	AA	AB	AB	AB	AB	AB	AB	AB	BB	AB	AA	AA	AA	AB	AB	AA	AB	BB	BB	AB	AB	AA	AA	AA	AA	AB	AA	AA	AA	AB	AB	AA	AB	AB	BB	AB	AA	AB	BB
rs13482687	15	86303733	BB	AB	AA	AA	AA	AA	AB	AA	AA	AB	AB	AB	AB	AA	AB	AB	AB	AB	AA	BB	AA	AB	AB	AB	AB	BB	BB	AB	AB	AA	AA	AB	AA	BB	AB	BB	BB	AB	AB	AB	AB	AA	BB	AB	BB	AB	AA
rs13482695	15	88856958	BB	BB	BB	BB	BB	BB	BB	BB	BB	BB	BB	BB	BB	BB	BB	AB	BB	BB	BB	BB	BB	BB	BB	BB	AB	BB	AB	AA	AB	BB	AB	AB	AB	BB	AB	AA	AA	AB	AB	AB	AB	AB	BB	BB	AA	BB	BB
rs13482704	15	90816455	AA	AB	BB	AB	BB	BB	AB	BB	BB	AB	AB	AB	AB	BB	AB	BB	AB	AB	BB	AA	BB	BB	AB	AA	AA	AA	AA	AA	AA	AB	AB	AA	AB	AA	AA	AA	AA	AB	AB	AA	AB	AB	AA	AB	AA	AB	BB
rs13482712	15	92664963	AA	AA	AA	AA	AA	AA	AA	AA	AA	AA	AA	AA	AA	AA	AA	AA	AA	AA	AA	BB	AA	AA	AA	AB	AB	AA	AB	AB	AA	AA	AA	AB	AA	AB	AA	AB	AB	AA	AB	AA	AB	AB	AB	AB	AA	AB	AA
rs3719217	15	95679367	BB	BB	BB	BB	BB	BB	BB	BB	BB	BB	BB	BB	BB	BB	BB	BB	BB	BB	BB	BB	BB	BB	BB	AB	BB	BB	BB	BB	BB	BB	BB	BB	BB	BB	BB	BB	BB	BB	BB	BB	BB	BB	BB	BB	BB	BB	BB
rs6285067	15	95741617	BB	BB	BB	BB	BB	BB	BB	BB	BB	BB	BB	BB	BB	BB	BB	BB	BB	BB	BB	BB	BB	BB	BB	BB	BB	BB	AB	AB	BB	BB	BB	BB	BB	AB	AB	AB	BB	BB	BB	BB	BB	BB	AB	AB	BB	AB	BB
rs13482729	15	97550224	BB	BB	BB	BB	BB	BB	BB	BB	BB	BB	BB	BB	BB	BB	BB	BB	BB	BB	BB	BB	BB	BB	BB	BB	BB	BB	BB	BB	BB	BB	BB	BB	BB	AB	BB	BB	BB	BB	BB	AB	BB	AB	BB	BB	BB	BB	BB
rs13482738	15	100255519	BB	BB	BB	BB	BB	BB	BB	BB	BB	BB	BB	BB	BB	BB	BB	BB	BB	BB	BB	BB	BB	BB	BB	BB	BB	BB	BB	BB	BB	BB	BB	BB	BB	BB	BB	BB	BB	BB	BB	BB	BB	BB	BB	BB	BB	BB	BB
rs13482744	15	102030597	AA	AA	AA	AA	AA	AA	AA	AA	AA	AA	AA	AA	AA	AA	AA	AA	AA	AA	AA	AA	AA	AA	AA	AA	AA	AA	AA	AA	AA	AA	AA	AA	AA	AB	BB	AB	AA	AB	AB	AB	AB	AA	AB	AB	AA	AB	AB
rs13482751	15	103433393	AA	AA	AA	AA	AA	AA	AA	AA	AA	AA	AA	AA	AA	AA	AA	AA	AA	AA	AA	AA	AA	AA	AA	AB	AA	AA	AA	AA	AA	AA	AA	AA	AA	AA	AA	AA	AA	AA	AA	AA	AA	AA	AA	AA	AA	AA	AA
rs4152638	16	4009670	AA	AA	AA	AA	AA	AA	AA	AA	AA	AA	AA	AA	AA	AA	AA	AA	AA	AA	AA	AB	AA	AA	AA	BB	AA	BB	AB	AB	AB	AA	AB	BB	AA	AB	AB	AB	BB	AA	AB	AA	AA	AB	BB	AB	BB	AB	AA
rs4152790	16	4532147	BB	BB	BB	BB	BB	BB	BB	BB	BB	BB	BB	BB	BB	BB	BB	BB	BB	BB	BB	BB	BB	BB	BB	BB	BB	BB	BB	BB	BB	BB	BB	BB	BB	AB	AB	AA	AA	AB	BB	BB	BB	BB	BB	AB	AB	AB	AB
rs4158907	16	7650712	AB	AA	BB	AB	BB	BB	AB	AB	BB	AA	BB	AA	AB	AB	AA	AB	AA	AB	AB	BB	AB	AA	AA	BB	AB	BB	AB	BB	BB	AA	BB	BB	AB	AB	AB	AB	BB	AA	AA	BB	AB	AB	AA	AB	AB	AB	AA
rs4160288	16	9258154	AA	AA	AA	AA	AA	AA	AA	AA	AA	AA	AA	AA	AA	AB	AA	AB	AA	AA	AA	AA	AA	AA	AA	AA	AA	AA	AA	AA	AA	AA	AA	AA	AA	AA	AA	AA	AA	AA	AA	AA	AA	AA	AA	AA	AA	AA	AA
rs4162800	16	12215630	AA	AA	AA	AA	AA	AA	AA	AA	AA	AA	AA	AA	AA	AA	AA	AA	AA	AA	AA	AB	AA	AA	AA	AA	AA	AA	AA	AB	AA	AA	AB	AA	AB	AA	AA	AB	AA	AB	AA	AA	AA	AA	AB	AA	AA	AA	AB
rs4163196	16	13143895	BB	BB	BB	BB	BB	BB	BB	BB	BB	BB	BB	BB	BB	BB	BB	BB	BB	BB	BB	BB	BB	BB	BB	BB	BB	BB	BB	BB	BB	BB	BB	BB	BB	BB	BB	BB	BB	BB	BB	BB	BB	BB	AB	BB	BB	BB	BB
rs4165081	16	19654956	BB	AB	BB	BB	AB	AB	AB	BB	BB	BB	AB	AB	AB	AB	AB	AB	AB	AB	BB	BB	BB	AB	BB	AB	BB	BB	BB	BB	BB	BB	BB	BB	BB	BB	BB	BB	BB	BB	BB	BB	BB	BB	BB	BB	BB	BB	BB
rs4165440	16	24022362	BB	BB	BB	BB	BB	BB	BB	BB	BB	BB	BB	BB	BB	BB	BB	BB	BB	BB	BB	BB	BB	BB	BB	BB	BB	BB	BB	BB	BB	BB	BB	BB	BB	BB	BB	BB	BB	BB	BB	BB	BB	BB	BB	BB	BB	BB	BB
rs4165467	16	25257147	AB	AB	AA	AB	AA	AB	AB	AB	AB	AB	AB	AB	AB	AB	AB	AB	AB	AB	BB	BB	AB	AA	AB	AB	AB	AB	AB	AB	AB	AB	AB	AA	AB	BB	AB	AB	AB	AB	AB	BB	AB	BB	AB	AB	AB	AB	AB
rs4165602	16	27277369	AB	AB	AB	AA	AB	AB	AB	AA	AA	AA	BB	AB	AB	AB	AB	AB	AB	AB	AA	AA	AA	AB	AA	AA	AA	AA	AA	AA	AB	AA	AA	AA	AA	AB	AB	AA	AA	BB	AB	AA	AB	AA	AB	AA	AA	AA	BB
rs4167031	16	28698520	AA	AA	AA	AA	AA	AA	AA	AA	AA	AA	AA	AA	AA	AA	AA	AA	AA	AA	AA	AA	AA	AA	AA	AB	AA	AA	AA	AA	AA	AA	AA	AA	AA	AB	AB	AA	AA	AA	AB	BB	AA	AB	AB	AA	AB	AA	AA
rs4168640	16	30855920	AA	AA	AA	AA	AA	AA	AA	AA	AA	AA	AA	AA	AA	AA	AA	AA	AA	AA	AA	AA	AA	AA	AA	AA	AA	AA	AA	AA	AA	AB	AA	AA	AA	AA	AA	AA	AA	AA	AA	AA	AA	AA	AA	AA	AA	AA	AA
rs4170308	16	32338346	AB	BB	BB	BB	BB	AB	BB	BB	BB	AB	BB	BB	AB	AB	AB	BB	BB	BB	AB	BB	AB	BB	BB	AB	AB	BB	AB	AB	BB	BB	AB	BB	BB	AB	AA	BB	BB	AA	AB	AA	AA	AB	AB	AB	BB	AB	AA
rs4171932	16	34183107	BB	BB	BB	BB	BB	BB	BB	BB	BB	BB	BB	BB	BB	BB	BB	BB	BB	BB	BB	BB	BB	BB	BB	AB	BB	BB	BB	AB	BB	BB	AB	BB	BB	BB	BB	BB	BB	BB	BB	BB	BB	BB	BB	BB	BB	BB	BB
rs4172915	16	35504262	AA	AA	AA	AA	AA	AA	AA	AA	AA	AA	AA	AA	AA	AA	AA	AA	AA	AA	AA	AB	AA	AA	AA	AA	AA	AA	AA	AA	AA	AA	AA	AA	AA	AA	AA	BB	BB	AA	AA	AA	AA	AA	AA	AB	AB	AB	AA
rs4173902	16	37207323	BB	BB	BB	BB	BB	BB	BB	BB	BB	BB	BB	BB	BB	BB	BB	BB	BB	BB	BB	BB	BB	BB	BB	BB	BB	BB	BB	BB	BB	BB	BB	BB	BB	BB	BB	BB	BB	BB	BB	BB	BB	BB	BB	BB	BB	BB	BB
rs4175608	16	39046740	AB	AB	AB	AB	AB	AB	BB	AB	AA	BB	AA	AA	BB	BB	AB	AA	AB	BB	AB	AB	AB	AB	BB	BB	AA	AA	AB	AA	AB	BB	AA	AA	AA	AA	AA	AA	AA	AA	AB	AA	AA	AB	AB	AA	AB	AA	AA
rs4177651	16	40548715	AB	BB	AB	BB	BB	BB	BB	BB	BB	AB	BB	BB	AB	BB	AB	BB	BB	BB	AB	AA	BB	BB	BB	AA	BB	BB	AB	AB	BB	AB	AB	BB	BB	AB	AB	BB	BB	AB	BB	AA	AB	AA	AB	AB	BB	AB	AB
rs4179075	16	42205435	AB	AA	AB	AA	AA	AA	AA	AA	AA	AB	AA	AA	AB	AA	AB	AA	AA	AA	AB	AB	AA	AA	AA	AB	AA	AA	AB	AB	AA	AB	AB	AA	AA	AB	AB	AA	AA	AB	AB	AA	AB	AB	AA	AA	AA	AA	AB
rs4182243	16	46008686	AB	AA	AB	AA	AA	AB	AB	AA	AA	AB	AA	AA	AB	AB	AB	AB	AB	AA	AB	AB	AA	AA	AA	AA	AA	AA	AB	AA	AB	AA	AA	AA	AA	AA	AA	AA	AA	AA	AA	AA	AA	AB	AA	AB	AB	AA	AA
rs4183448	16	47148630	BB	AB	BB	AA	AB	AB	AA	AA	AB	AB	AB	AB	AB	AA	BB	AB	AB	AB	BB	BB	AB	AB	AA	BB	AA	BB	BB	AB	AB	AB	BB	BB	AB	BB	BB	BB	BB	BB	BB	BB	BB	BB	BB	BB	BB	BB	BB
rs4185639	16	50209266	AA	AA	AA	AA	AA	AA	AA	AA	AA	AA	AA	AA	AA	AA	AA	AA	AA	AA	AA	AA	AA	AA	AA	AB	AA	AA	AA	AA	AA	AB	AA	AA	AA	AA	AA	AA	AA	AA	AA	AA	AA	AA	AA	AA	AB	AA	AA
rs4186744	16	51371684	BB	BB	BB	BB	BB	BB	BB	BB	BB	BB	BB	BB	BB	BB	BB	BB	BB	BB	BB	BB	BB	BB	BB	BB	BB	BB	BB	BB	BB	BB	BB	BB	BB	AB	AB	BB	BB	BB	BB	AA	BB	AB	BB	BB	AB	BB	BB
rs6163640	16	53434895	AB	AA	AB	AA	AA	AA	AA	AA	AA	AB	AA	AA	AB	AA	AB	AA	AA	AA	AB	AB	AA	AA	AA	AA	AA	AA	AB	AA	AA	AA	AA	AA	AA	AA	AA	AA	AA	AA	AA	AA	AA	AA	AA	AA	AB	AA	AA
CZECH-16_55104521	16	55104521	AB	AB	AB	AA	AB	AB	AA	AA	AB	AA	AB	AA	AA	AA	AB	AB	AB	AA	AA	AA	AA	AA	AA	AB	AA	BB	AB	BB	AB	AA	BB	BB	AB	AA	AA	BB	BB	AA	AB	AA	AA	AA	AB	AB	AB	AB	AA
rs4189277	16	57472587	AB	BB	AB	BB	BB	BB	BB	BB	BB	AB	BB	BB	AB	BB	AB	BB	BB	BB	AB	BB	BB	BB	BB	BB	BB	BB	BB	BB	BB	BB	AB	BB	BB	BB	AB	BB	BB	AB	AB	BB	AA	AB	BB	AB	BB	AB	AB
rs4191367	16	59391239	BB	AB	BB	AA	AB	AB	AA	AA	AB	AB	AB	AA	AB	AA	BB	AB	AB	AA	AB	BB	AA	AA	AA	AA	AA	BB	AB	AB	AB	AA	BB	BB	AB	BB	BB	BB	BB	BB	BB	BB	BB	AB	BB	BB	AB	BB	BB
rs4193069	16	61234639	AA	AA	AA	AA	AA	AA	AA	AA	AA	AA	AA	AA	AA	AA	AA	AA	AA	AA	AA	AA	AA	AA	AA	AB	AA	AA	AA	AA	AA	AA	AA	AA	AA	AA	AA	AA	AA	AA	AA	AA	AA	AA	AA	AA	AA	AA	AA
rs4194417	16	63055086	AA	AA	AA	AA	AA	AA	AA	AA	AA	AA	AA	AA	AA	AA	AA	AA	AA	AA	AA	AA	AA	AA	AA	AA	AA	AA	AA	AA	AA	AB	AA	AA	AA	AA	AA	AA	AA	AA	AA	AA	AB	BB	AA	AB	AA	AB	AA
rs4197150	16	66573423	BB	BB	BB	BB	BB	BB	BB	BB	BB	BB	BB	BB	BB	BB	BB	BB	BB	BB	BB	BB	BB	BB	BB	BB	BB	BB	BB	BB	BB	BB	BB	BB	BB	BB	BB	BB	BB	BB	BB	BB	BB	BB	BB	BB	BB	BB	BB
rs4197715	16	67541594	BB	AB	BB	AA	AB	AB	AA	AA	AB	AB	AB	AA	AB	AB	BB	AB	AB	AA	AB	AB	AA	AA	AA	AB	AA	BB	AB	BB	AB	AB	AB	BB	AB	AA	BB	BB	BB	BB	BB	AA	BB	AB	BB	BB	AB	BB	BB
rs4198737	16	69301525	BB	AB	BB	AA	AB	AB	AA	AA	AB	AB	AB	AA	AB	AB	BB	AB	AB	AA	AB	AA	AA	AA	AA	AA	AA	BB	AB	AB	AB	AA	AB	BB	AB	AA	AA	BB	BB	AB	AB	AA	AB	AA	BB	AB	AB	AB	AB
rs4200124	16	71033149	AB	AB	AB	AA	AB	AB	AA	AA	AB	AB	AB	AA	AA	AB	AB	AB	AA	AA	AA	AB	AA	AA	AA	AB	AA	BB	AB	BB	AB	AA	AB	BB	AB	AA	AB	BB	BB	AB	BB	AA	BB	AB	AB	BB	AB	BB	AB
rs4201998	16	72860280	AB	BB	AB	BB	BB	BB	BB	BB	BB	BB	BB	BB	AB	BB	AB	BB	BB	BB	AB	BB	BB	BB	BB	AA	BB	BB	BB	BB	BB	AB	BB	BB	BB	AA	AB	AA	AA	BB	AB	AA	AB	AB	AB	AB	AA	AB	BB
rs4204106	16	74547672	AA	BB	AA	BB	AB	AB	BB	BB	AB	AB	AB	BB	AB	AB	AB	BB	BB	BB	AB	AB	BB	BB	BB	AA	BB	AB	BB	AB	AB	AB	AB	AB	BB	AB	AB	BB	BB	AA	AB	AB	AB	AA	AB	AB	AB	AB	AA
rs3718160	16	77227010	AA	AA	AA	AA	AA	AA	AA	AA	AA	AA	AA	AA	AA	AA	AA	AA	AA	AA	AA	AA	AA	AA	AA	AA	AA	AB	AB	AA	AA	AB	AA	AB	AA	AA	AA	AA	AA	AA	AA	AA	AA	AA	AB	AA	AB	AA	AA
rs6317052	16	79873189	AA	AA	AA	AA	AA	AA	AA	AA	AA	AA	AA	AA	AA	AA	AA	AA	AA	AA	AA	AA	AA	AA	AA	AB	AA	AA	AA	AA	AA	AB	AA	AA	AA	BB	BB	AA	AA	AB	AB	BB	AB	AB	AB	AA	AB	AA	AB
rs4211364	16	81210555	AB	BB	AA	BB	AB	AB	BB	BB	AB	AB	AB	BB	AB	AB	BB	BB	BB	BB	AB	BB	BB	BB	BB	AA	BB	AB	BB	BB	AB	AB	BB	BB	BB	AA	AA	AA	AA	AA	AA	AA	AB	AB	AA	AA	AA	AA	AA
rs4211664	16	83161949	AA	BB	AA	BB	AB	AB	BB	BB	AB	AB	AB	BB	AB	AB	BB	BB	BB	BB	AB	AA	BB	AB	BB	AB	AB	AA	AB	AB	AB	AB	BB	AB	BB	BB	AA	AA	AA	AB	AB	AB	AB	AB	AB	AA	AB	AA	AB
rs3680665	16	84938923	AA	AA	AA	AA	AA	AA	AA	AA	AA	AA	AA	AA	AA	AA	AA	AA	AA	AA	AA	AA	AA	AA	AA	AA	AA	AA	AA	AA	AA	AA	AA	AA	AA	AA	AA	AA	AA	AA	AA	AA	AA	AA	AA	AA	AA	AA	AA
rs4212102	16	85479261	BB	BB	BB	BB	BB	BB	BB	BB	BB	BB	BB	BB	BB	BB	BB	BB	BB	BB	BB	BB	BB	BB	BB	BB	AB	AB	AB	BB	BB	BB	BB	AB	BB	BB	BB	BB	BB	BB	BB	BB	BB	BB	BB	BB	BB	BB	BB
rs4213268	16	86836511	AB	BB	BB	BB	BB	BB	BB	BB	BB	BB	BB	BB	BB	BB	BB	BB	BB	BB	BB	AA	BB	AB	BB	AB	AB	AB	AB	AB	BB	AB	BB	AB	BB	AB	AA	AA	AA	AB	AA	AB	AB	AA	AA	AA	AA	AA	AB
rs4214396	16	87920304	AB	AA	BB	AA	AB	AB	AA	AA	AB	AB	AB	AA	AB	AB	AA	AA	AA	AA	AB	AB	AA	AA	AA	AB	AB	BB	AB	AA	AB	AA	AA	AB	AA	AA	BB	BB	BB	AB	AB	AB	AB	AB	BB	BB	BB	AB	AB
petM-01322-2	16	88587815	AA	AA	AA	AA	AA	AA	AA	AA	AA	AA	AA	AA	AA	AA	AA	AA	AA	AA	AA	AA	AA	AA	AA	AB	AA	AA	AA	AA	AA	AA	AA	AA	AA	AA	AA	AA	AA	AB	AA	AA	AA	AA	AA	AA	AA	AA	AB
rs4219905	16	93471889	NN	AA	BB	AA	AB	AB	AA	AA	AB	AB	AB	AA	AB	AB	AA	AA	AA	AA	AA	BB	AA	AA	AB	BB	AB	AB	AB	AB	AA	AA	AB	AA	AA	AB	BB	BB	BB	AB	BB	AB	BB	BB	BB	BB	BB	BB	AB
rs3712360	16	94018736	BB	BB	BB	BB	BB	BB	BB	BB	BB	BB	BB	BB	BB	BB	BB	BB	BB	BB	BB	AB	BB	BB	BB	BB	BB	BB	BB	BB	BB	AB	BB	BB	BB	AA	AA	BB	BB	AB	AB	AA	AB	AA	BB	AB	AB	AB	AA
rs3696981	16	98191753	AA	AA	AA	AA	AA	AA	AA	AA	AA	AA	AA	AA	AA	AA	AA	AA	AA	AA	AA	AB	AA	AA	AA	AA	AA	AA	AA	AA	AA	AA	AA	AA	AA	AA	AA	AA	AA	AA	AA	AA	AA	AA	AA	AA	AA	AA	AA
rs4136382	17	3388654	BB	BB	BB	BB	BB	BB	BB	BB	BB	BB	BB	BB	BB	BB	BB	BB	BB	BB	BB	BB	BB	BB	BB	AB	AB	AB	BB	BB	BB	BB	AB	AB	BB	BB	BB	BB	BB	AB	AB	BB	BB	AB	AB	AB	AB	AB	BB
rs13482843	17	4044700	BB	BB	BB	BB	BB	BB	BB	BB	AB	BB	BB	BB	BB	BB	AB	AB	BB	BB	AB	AA	BB	AB	BB	AB	AA	AA	AA	AB	AB	AA	BB	AA	BB	BB	AB	AB	AB	BB	BB	BB	BB	BB	AB	AB	AB	AB	BB
rs13482845	17	4592511	AA	AA	AA	AA	AA	AA	AA	AA	AB	AA	AA	AA	AA	AA	AB	AB	AA	AA	AB	BB	AA	AB	AA	BB	BB	BB	BB	AB	AB	BB	AB	BB	AA	BB	AB	BB	BB	BB	BB	BB	BB	BB	BB	BB	BB	BB	BB
UT_17_3.221024	17	5989632	BB	BB	BB	BB	BB	BB	BB	BB	AB	BB	BB	BB	BB	BB	AB	AB	BB	BB	AB	BB	BB	AB	BB	AA	AB	AB	AB	AB	AB	AB	BB	AB	BB	BB	BB	BB	BB	BB	BB	BB	BB	BB	BB	BB	BB	BB	BB
rs6196216	17	8381669	AA	AA	AA	AA	AA	AA	AA	AA	AA	AA	AA	AA	AA	AA	AA	AA	AA	AA	AA	AA	AA	AA	AA	AB	AB	AB	AA	AA	AA	AB	AB	AB	AA	BB	BB	BB	BB	BB	BB	BB	BB	BB	BB	BB	BB	BB	BB
rs3662575	17	9388595	BB	AB	BB	AB	BB	BB	BB	BB	AB	BB	BB	BB	BB	BB	AB	AB	BB	BB	AB	AA	BB	AB	BB	AA	AA	AA	AA	AA	AB	AA	BB	AA	BB	AA	AA	AA	AB	AA	AA	AA	AA	AA	AA	AB	AA	AB	AA
rs3662820	17	11723443	AA	AA	AA	AA	AA	AA	AA	AA	AA	AA	AA	AA	AA	AA	AA	AA	AA	AA	AA	BB	AA	AA	AA	AA	AA	AA	AB	AA	AA	AA	AB	AA	AA	AA	AA	AA	AA	AA	AA	AA	AA	AA	AA	AA	AA	AA	AA
rs3672065	17	13064499	AA	AA	AA	AA	AA	AA	AA	AA	AA	AA	AA	AA	AA	AA	AA	AA	AA	AA	AA	AA	AA	AA	AA	AA	AB	AB	AA	AA	AA	AA	AA	AB	AA	AA	AA	AA	AA	AA	AA	AA	AA	AA	AA	AA	AA	AA	AA
rs3726555	17	15215815	BB	BB	BB	BB	BB	BB	BB	BB	BB	BB	BB	BB	BB	BB	BB	BB	BB	BB	BB	AA	BB	BB	BB	BB	BB	BB	AB	AB	BB	BB	BB	BB	BB	BB	BB	BB	BB	BB	BB	BB	BB	BB	BB	BB	BB	BB	BB
rs13482899	17	16276466	BB	BB	BB	BB	BB	BB	BB	BB	BB	BB	BB	BB	BB	BB	BB	BB	BB	BB	BB	BB	BB	BB	BB	AB	BB	BB	BB	BB	BB	AB	BB	BB	BB	AB	AA	AA	AB	AA	AA	AB	AB	AA	AA	AB	AA	AB	AA
rs13482914	17	19510335	BB	AB	BB	BB	BB	BB	BB	AB	AB	AB	AB	AB	BB	AA	AB	AB	AB	AB	AA	AA	AB	AB	BB	AB	AB	AB	AA	AB	AA	AB	BB	AB	AB	BB	BB	BB	AB	BB	BB	BB	BB	BB	BB	AB	BB	AB	BB
rs3719497	17	24100880	AA	AA	AA	AA	AA	AA	AA	AA	AA	AA	AA	AA	AA	AA	AA	AA	AA	AA	AA	AA	AA	AA	AA	AA	AB	AB	AA	AA	AA	AA	AB	AB	AA	AB	AA	AA	AB	AA	AA	AB	AB	AA	AA	AB	AA	AB	AA
rs6397584	17	26039914	AA	AA	AA	AA	AA	AA	AA	AA	AA	AA	AA	AA	AA	AA	AA	AA	AA	AA	AA	AA	AA	AA	AA	AA	AA	AA	AA	AA	AA	AA	AA	AA	AA	AB	AB	AB	AB	AB	AB	AB	AB	AB	AA	AA	AA	AA	BB
rs3693494	17	28381655	BB	BB	BB	BB	BB	BB	BB	BB	BB	BB	BB	BB	BB	BB	BB	BB	BB	BB	BB	BB	BB	BB	BB	BB	BB	BB	AB	BB	BB	BB	BB	BB	BB	BB	BB	BB	BB	BB	BB	BB	BB	BB	BB	BB	BB	BB	BB
rs3672987	17	31726297	AB	BB	AB	BB	AB	BB	AB	BB	BB	BB	BB	BB	BB	BB	BB	BB	BB	BB	BB	BB	BB	AB	AB	AB	BB	BB	AB	AB	BB	AA	AB	BB	BB	AB	AA	AB	AB	BB	BB	AA	AB	BB	AB	AB	AA	AB	BB
rs3682923	17	34343989	AA	AA	AA	AA	AA	AA	AA	AA	AA	AA	AA	AA	AA	AA	AA	AA	AA	AA	AA	AA	AA	AA	AA	AB	AA	AA	AB	AA	AA	AA	AB	AA	AA	AB	BB	BB	BB	AB	AB	AB	AB	AB	AB	AB	BB	AB	BB
rs6298471	17	35059374	AB	BB	AB	BB	AB	BB	AB	BB	BB	BB	BB	BB	BB	BB	AB	BB	BB	BB	BB	BB	BB	AB	AB	AB	AB	AB	BB	AB	BB	BB	AB	AB	BB	BB	AA	AA	AA	AA	AA	AB	AB	AA	AA	AA	AA	AA	AA
rs3702604	17	39103029	AA	AA	AA	AA	AA	AA	AA	AA	AA	AA	AA	AA	AA	AA	AA	AA	AA	AA	AA	BB	AA	AA	AA	AB	AA	AA	AB	AB	AA	AA	AB	AA	AB	AB	AA	AB	BB	BB	BB	AB	BB	BB	AB	BB	AA	BB	BB
CEL-17_39772541	17	39772541	AB	BB	AB	BB	AB	BB	AB	BB	BB	BB	BB	BB	BB	BB	AB	BB	BB	BB	BB	BB	BB	AB	AB	AB	AB	AB	BB	AB	BB	AB	AB	AB	BB	AB	BB	BB	BB	BB	BB	BB	BB	BB	BB	BB	BB	BB	BB
rs13482997	17	41975280	BB	BB	BB	BB	BB	BB	BB	BB	BB	BB	BB	BB	BB	BB	BB	BB	BB	BB	BB	BB	BB	BB	BB	BB	BB	BB	AB	BB	BB	BB	BB	BB	BB	BB	AA	AB	BB	BB	BB	AB	BB	BB	AB	BB	AA	BB	BB
rs13483002	17	43897393	BB	BB	BB	BB	BB	BB	BB	BB	BB	BB	BB	BB	BB	BB	BB	BB	BB	BB	BB	BB	BB	BB	BB	BB	BB	BB	BB	BB	BB	AB	BB	BB	BB	BB	BB	BB	BB	AB	AB	BB	BB	AB	AB	AB	BB	AB	BB
rs6409750	17	45506664	AB	AB	AB	BB	AB	BB	AB	BB	AB	AB	AB	AB	AB	AB	AB	AB	BB	AB	AA	AA	AB	AB	AB	AA	AA	AB	AA	AA	AA	AA	AA	AA	AA	AA	AA	AA	AA	AA	AA	AA	AA	AA	AA	AA	AA	AA	AA
rs13483016	17	47737011	AA	AB	AA	AB	AA	AA	AA	AA	AB	AB	AA	AB	AA	AB	AA	AB	AA	AB	AB	BB	AB	AA	AA	BB	AB	AA	BB	BB	BB	BB	AB	BB	BB	BB	BB	BB	BB	AB	AB	BB	BB	AB	AB	AB	BB	AB	BB
rs3700227	17	50793087	BB	BB	BB	BB	BB	AB	AB	BB	BB	BB	BB	BB	BB	AB	BB	AB	BB	BB	BB	AB	BB	BB	BB	BB	BB	BB	BB	BB	AB	BB	BB	BB	BB	BB	BB	BB	BB	BB	BB	BB	BB	BB	BB	BB	BB	BB	BB
rs6272475	17	51663908	AB	AB	AB	AB	AB	AA	AB	AA	AB	AB	AA	AB	AB	AB	AB	AB	AA	AB	BB	BB	AB	AB	AB	BB	BB	AB	AB	BB	BB	BB	BB	AB	AB	BB	BB	BB	BB	AB	AB	BB	BB	BB	BB	BB	BB	BB	BB
rs3714226	17	53552802	AB	BB	AB	BB	AB	BB	AB	BB	BB	BB	BB	BB	AB	BB	AB	BB	BB	BB	AB	AA	BB	AB	AB	BB	AB	AB	BB	AB	BB	BB	AB	BB	BB	BB	BB	BB	BB	BB	BB	BB	BB	BB	BB	BB	BB	BB	BB
rs3715723	17	56999568	AB	AB	AA	AA	AB	AA	AB	AA	AA	AA	AA	AA	AB	AA	AB	AA	AA	AA	AB	BB	AA	AB	AB	AB	AB	AB	AB	AB	AA	AA	AA	AB	AA	AA	BB	AB	AB	AB	BB	AB	BB	AB	AB	AA	BB	AA	AB
gnf17.064.100	17	61107080	BB	BB	BB	BB	BB	BB	BB	BB	BB	BB	BB	BB	BB	BB	BB	BB	BB	BB	BB	BB	BB	BB	BB	BB	BB	BB	AB	BB	BB	BB	AB	AB	BB	AA	BB	AB	AB	AB	AB	AB	BB	AB	AB	AA	BB	AA	AB
rs6402097	17	62066360	BB	BB	BB	BB	BB	BB	BB	BB	BB	BB	BB	BB	BB	BB	BB	BB	BB	BB	BB	BB	BB	BB	BB	BB	BB	BB	BB	BB	BB	BB	BB	BB	BB	BB	BB	BB	BB	BB	BB	BB	BB	BB	BB	BB	BB	BB	BB
rs3727008	17	66156395	AA	AA	AA	AA	AA	AA	AA	AA	AB	AA	AA	AA	AA	AA	AA	AB	AA	AA	AA	AB	AA	AA	AA	BB	AB	AB	AB	AB	AA	AA	AA	AB	AB	AB	AA	AB	AB	AB	AB	AA	AA	AA	AA	AB	AA	AB	AB
rs3660112	17	69021924	AA	AA	AA	AA	AA	AA	AA	AA	AA	AA	AA	AA	AA	AA	AA	AA	AA	AA	AA	AA	AA	AA	AA	AA	AA	AA	AA	AA	NN	AA	AA	AA	AA	BB	AA	AB	AB	AB	AA	AB	AA	AB	AA	AB	AA	AB	AB
rs3675634	17	69670995	AB	BB	BB	BB	BB	BB	BB	BB	AB	AB	BB	AB	BB	AA	BB	AB	BB	AB	AB	BB	AB	BB	BB	BB	BB	BB	AB	BB	BB	AB	AB	AB	AB	AA	AA	AA	AA	AA	AA	AA	AA	AA	AA	AB	AA	AB	AA
rs13483103	17	72668814	AA	AA	AA	AA	AA	AA	AA	AA	AA	AA	AA	AA	AA	AA	AA	AA	AA	AA	AA	AA	AA	AA	AA	AB	AA	AA	AA	AA	AA	AB	AB	AA	AB	BB	BB	BB	BB	BB	AB	BB	BB	BB	AB	BB	BB	BB	BB
rs6229946	17	73658199	AB	BB	BB	BB	BB	BB	BB	BB	AB	AB	BB	AB	BB	AA	BB	AB	BB	AA	AB	BB	AB	BB	BB	BB	BB	BB	BB	BB	BB	BB	AB	BB	BB	AB	AB	AB	AB	AA	AB	AB	AB	AB	AB	AB	BB	AB	AA
rs3663088	17	75526825	AB	AA	AA	AA	AA	AA	AA	AA	AB	AB	AA	AB	AA	BB	AA	AA	AA	BB	AB	BB	AB	AA	AA	AB	AA	AA	AB	AB	AA	AB	AA	AB	AB	AB	AB	AB	AB	AB	AB	AB	BB	AB	AB	AB	BB	BB	AB
gnf17.082.284	17	79515223	AB	BB	AB	BB	BB	AB	AB	BB	AB	AB	AB	AA	BB	AB	BB	AB	BB	AB	AB	AA	AB	BB	BB	AA	BB	BB	BB	AB	AB	AB	BB	BB	AB	AA	AA	AA	AA	AB	AA	AA	AB	AA	AB	AA	AA	AA	AB
gnf17.083.842	17	81077502	BB	BB	BB	BB	BB	BB	BB	BB	BB	BB	BB	BB	BB	BB	BB	BB	BB	BB	BB	BB	BB	BB	BB	BB	BB	BB	BB	BB	BB	BB	BB	BB	BB	BB	BB	BB	BB	BB	BB	BB	BB	BB	BB	BB	BB	BB	BB
rs13483135	17	82051202	AA	AA	AB	AB	AB	AA	AB	AA	AA	AA	AB	AB	AB	AA	BB	AB	AA	AB	AB	AA	AA	BB	AA	AB	AB	AB	AB	AB	BB	AB	AB	AB	AB	BB	AB	AA	AA	AA	AB	AB	AB	AB	AA	AB	AA	AB	AA
rs13483144	17	84456436	BB	BB	BB	BB	BB	BB	BB	BB	BB	BB	BB	BB	BB	BB	BB	BB	BB	BB	BB	BB	BB	BB	BB	BB	BB	BB	BB	BB	BB	BB	BB	BB	BB	BB	BB	BB	BB	BB	BB	BB	BB	BB	BB	AB	BB	BB	BB
rs4231720	17	85385338	BB	BB	BB	BB	BB	BB	BB	BB	BB	BB	BB	BB	BB	BB	BB	BB	BB	BB	BB	AA	BB	BB	BB	AA	AB	AB	AB	AB	BB	BB	AB	AB	BB	AA	AB	AB	AB	AB	AB	AB	BB	AA	AB	AA	AB	AA	AB
rs13483157	17	87503632	BB	BB	AB	AB	AB	BB	AB	AB	AB	BB	AB	AB	AB	AB	AA	AB	BB	AB	AB	BB	BB	AB	AB	BB	AB	AB	AB	AA	AA	AB	AB	AB	AB	BB	BB	BB	BB	BB	BB	BB	BB	BB	BB	BB	BB	BB	BB
rs6288047	17	90215134	BB	BB	BB	BB	BB	BB	BB	BB	BB	BB	BB	BB	BB	BB	BB	BB	BB	BB	BB	BB	BB	BB	BB	BB	BB	BB	BB	AB	BB	BB	BB	BB	BB	BB	BB	BB	BB	AB	BB	BB	AB	BB	BB	BB	BB	BB	AB
rs6397044	17	91938734	BB	BB	BB	BB	BB	BB	BB	BB	BB	BB	BB	BB	BB	BB	BB	BB	BB	BB	BB	BB	BB	BB	BB	BB	BB	BB	BB	BB	BB	BB	BB	BB	BB	BB	AB	AB	AB	AB	AA	AB	AA	AB	AA	AA	AB	AB	AB
rs3706382	17	92912930	AA	AA	AA	AA	AA	AA	AA	AA	AA	AA	AA	AA	AA	AA	AA	AA	AA	AA	AA	AA	AA	AA	AA	AA	AA	AA	AA	AA	AA	AA	AA	AA	AA	AA	AA	AA	AA	AA	AA	AA	AA	AA	AB	AB	AA	NN	AA
rs13483183	18	3687056	AA	AA	AA	AA	AA	AA	AA	AA	AA	AA	AA	AA	AA	AA	AA	AA	AA	AA	AA	AA	AA	AA	AA	AB	AA	AA	AA	AA	AA	AA	AA	AA	AA	AA	AA	AB	AA	AA	AA	AA	AA	AA	AB	AA	AB	AA	AB
gnf18.001.688	18	4813500	AA	AA	AA	AA	AA	AA	AA	AA	AA	AA	AA	AA	AA	AA	AA	AA	AA	AA	AA	AA	AA	AA	AA	AA	AB	AB	BB	AA	AA	AA	AA	AB	AB	AB	BB	BB	AB	BB	BB	BB	BB	BB	AB	AB	BB	BB	BB
rs3689558	18	8254573	AA	AA	AA	AA	AA	AA	AA	AA	AA	AA	AA	AA	AA	AA	AA	AA	AA	AA	AA	AA	AA	AA	AA	AB	AB	AA	AA	AA	AA	AA	AA	AA	AB	AA	AB	AB	AB	AB	AB	AB	BB	BB	AB	AB	AA	AB	AB
rs3660245	18	9491813	BB	BB	BB	BB	BB	BB	BB	BB	BB	BB	BB	BB	BB	BB	BB	BB	BB	BB	BB	BB	BB	BB	BB	AB	AB	BB	BB	BB	AB	BB	BB	BB	BB	BB	BB	BB	BB	BB	BB	BB	BB	BB	BB	BB	BB	BB	BB
rs4231742	18	11306822	AA	AA	BB	BB	BB	BB	AB	AA	BB	AA	AA	AA	AB	AB	AB	AB	AA	AA	AA	BB	AB	BB	AB	BB	AA	BB	AB	BB	BB	AB	BB	BB	AB	AB	AB	BB	BB	BB	BB	AB	BB	BB	AB	BB	BB	BB	BB
rs13483212	18	12477417	BB	BB	AB	AB	AB	AB	AB	BB	BB	BB	BB	BB	AB	BB	AB	AB	BB	BB	BB	AB	BB	AB	AB	AA	AA	AA	AA	AA	AB	AA	AA	AA	BB	AA	AA	AB	AA	AA	AA	AA	AA	AA	AA	AA	AB	AA	AB
mCV23617245	18	14895705	BB	BB	AB	AB	AB	AB	AB	BB	BB	BB	BB	BB	AB	BB	AB	AB	BB	BB	BB	BB	AB	AA	AB	BB	BB	AA	AB	AB	AB	AA	AA	AB	BB	AB	AB	AB	AA	AB	AB	AB	AA	AA	AA	AA	BB	AB	AB
rs6361186	18	15373312	BB	BB	AA	AA	AA	AA	AB	BB	AA	BB	BB	BB	AB	BB	AB	AB	BB	BB	BB	AA	AB	AA	AB	AB	AB	AA	AA	AA	AA	AA	AA	AA	BB	AA	AB	AB	BB	AB	AB	AB	BB	BB	AB	BB	AA	AB	BB
rs6358426	18	16784949	BB	BB	BB	BB	BB	BB	BB	BB	BB	BB	BB	BB	BB	BB	BB	BB	BB	BB	BB	BB	BB	BB	BB	BB	BB	BB	BB	BB	BB	AB	BB	BB	AB	BB	BB	BB	BB	AB	AB	BB	BB	BB	BB	BB	AB	AB	BB
rs13483244	18	21226461	BB	BB	BB	BB	BB	BB	BB	BB	BB	BB	BB	BB	BB	BB	BB	BB	BB	BB	BB	BB	BB	BB	BB	BB	BB	BB	BB	BB	BB	AB	BB	BB	BB	BB	BB	BB	AB	BB	BB	BB	BB	BB	BB	AB	BB	BB	BB
rs4138020	18	23001325	BB	BB	BB	BB	BB	BB	BB	BB	BB	BB	BB	BB	BB	BB	BB	BB	BB	BB	BB	BB	BB	BB	BB	BB	BB	BB	BB	BB	BB	BB	BB	BB	BB	BB	BB	AB	BB	BB	BB	BB	BB	BB	AB	BB	AB	BB	BB
gnf18.021.931	18	24860622	AA	AA	AA	AA	AA	AA	AA	AA	AA	AA	AA	AA	AA	AA	AA	AA	AA	AA	AA	AA	AA	AA	AA	AA	AA	AA	AA	AA	AA	AA	AA	AA	AA	AA	AA	AA	AA	AA	AA	AA	AA	AA	AA	AA	AA	AA	AA
gnf18.022.796	18	25729264	AA	AA	AA	AA	AA	AA	AA	AA	AA	AA	AA	AA	AA	AA	AA	AA	AA	AA	AA	AA	AA	AA	AA	AB	AA	AA	AA	AA	AA	AA	AA	AA	AA	BB	AB	AB	AA	AB	AB	AB	AA	AA	AB	AA	BB	AB	AA
rs13483263	18	26881733	AA	AA	AB	AB	AB	AB	BB	AB	AA	AA	AA	AA	AB	AB	BB	BB	AB	AA	AA	AA	AB	AB	BB	AB	AA	AB	AB	AB	AA	AB	BB	AB	AA	AA	AB	AB	BB	AB	AB	AB	BB	BB	AB	BB	AA	AB	BB
rs13483271	18	29410281	AA	AA	AB	AB	AB	AB	BB	AB	AA	AA	AA	AA	AB	AB	BB	BB	AB	AA	AA	AA	AB	AB	BB	AA	AA	AA	AA	AB	AA	AA	BB	AA	AA	AA	AA	AA	AA	AA	AA	AA	AA	AA	AA	AA	AA	AA	AA
rs3722973	18	31395543	BB	BB	BB	BB	BB	BB	BB	BB	BB	BB	BB	BB	BB	BB	BB	BB	BB	BB	BB	AB	BB	BB	BB	AB	BB	AB	AB	BB	BB	AB	BB	AA	AB	AA	AB	AB	AB	AB	AB	AB	BB	BB	AB	AB	AA	AB	BB
rs3718586	18	33572164	AA	AA	AA	AA	AA	AA	AA	AA	AA	AA	AA	AA	AA	AA	AA	AA	AA	AA	AA	AA	AA	AA	AA	AB	AA	AA	AA	AA	AA	AA	AA	AA	AA	AA	AA	AB	AA	AA	AA	AA	AA	AA	AB	AA	AB	AA	AA
rs13483299	18	36563136	AA	AB	AB	BB	BB	BB	BB	AB	BB	AB	AA	AA	AB	BB	AB	BB	BB	AB	BB	AA	BB	BB	AB	AB	AB	AB	AA	AA	BB	AB	AA	AA	AA	BB	AB	AA	AB	AB	AB	BB	AA	AA	AA	AB	AB	AB	AA
rs3664831	18	37737388	BB	BB	AB	AB	AB	AB	AA	AB	BB	BB	BB	BB	AB	AB	AB	AA	AB	BB	BB	AB	BB	AB	AB	BB	AB	BB	AB	AA	BB	BB	AA	BB	AB	BB	BB	BB	AB	AB	BB	BB	AB	AB	BB	AB	BB	BB	BB
rs3699816	18	39756682	BB	AB	AB	AA	AA	AA	AA	AB	AA	AB	BB	BB	AB	AA	AB	AA	AA	AB	AA	AA	AA	AA	AB	AA	AA	AB	AB	AA	AA	AA	AA	AB	AB	AA	AA	AA	AB	AB	AA	AA	AB	AB	AA	AB	AA	AA	AB
rs13483319	18	41351739	AA	AB	AB	BB	BB	BB	BB	AB	BB	AB	AA	AA	AB	BB	AB	BB	BB	AB	BB	BB	BB	BB	AB	AB	BB	AB	AB	BB	BB	AB	BB	AB	AB	AB	AB	AA	AA	BB	AB	AB	AB	AB	AA	AA	AB	BB	AA
rs3676196	18	43364740	BB	BB	BB	BB	BB	BB	BB	BB	BB	BB	BB	BB	BB	BB	BB	BB	BB	BB	BB	BB	BB	BB	BB	BB	BB	BB	BB	BB	BB	BB	BB	BB	BB	BB	BB	BB	BB	BB	BB	BB	BB	BB	BB	BB	BB	BB	BB
rs4231834	18	44463060	BB	AB	AB	AA	AA	AA	AA	AB	AA	AB	BB	BB	AB	AA	AB	AA	AA	AB	AA	AA	AA	AB	AB	AA	AA	AB	AB	AA	AA	AB	AA	AB	AB	AA	AA	AA	AA	AA	AA	AA	AA	AA	AA	AA	AA	AA	AA
CEL-18_46082735	18	46082735	BB	AB	BB	AA	AB	AB	BB	BB	AA	AB	BB	BB	BB	AB	BB	BB	AB	AB	AA	BB	AA	BB	BB	AB	AB	AB	BB	BB	AA	AB	AB	AB	BB	AB	AB	BB	AB	AB	AB	AB	BB	AB	BB	AA	AB	AB	BB
rs6184541	18	47884501	BB	BB	BB	BB	BB	BB	BB	BB	BB	BB	BB	BB	BB	BB	BB	BB	BB	BB	BB	BB	BB	BB	BB	BB	BB	BB	BB	BB	BB	BB	BB	AB	BB	BB	BB	BB	BB	BB	BB	BB	BB	BB	BB	BB	BB	BB	BB
mCV24106092	18	49464960	BB	BB	BB	BB	BB	BB	BB	BB	BB	BB	BB	BB	BB	BB	BB	BB	BB	BB	BB	BB	BB	BB	BB	BB	BB	BB	BB	BB	BB	BB	BB	BB	AB	BB	BB	BB	BB	BB	BB	BB	BB	BB	BB	BB	BB	BB	AB
rs3674314	18	51674308	AA	AA	AB	AA	AB	AB	BB	AB	AA	AA	AA	AA	AB	AB	AB	BB	AB	AA	AA	BB	AA	AB	AB	AB	AB	AB	BB	BB	AA	AB	BB	AB	AA	AB	AB	AB	BB	AB	AB	AB	BB	AB	AB	AB	AA	AB	AB
rs3683378	18	56183873	AA	AA	AB	AA	AB	AB	BB	AB	AA	AA	AA	AA	AB	AB	BB	BB	AB	AB	AA	AA	AA	AB	AB	AB	AB	AA	AA	AA	AA	AB	AB	AB	AA	AA	AA	AB	AA	AA	AA	AA	AA	AA	AB	AA	AB	AA	AB
rs6328845	18	58310005	BB	BB	BB	BB	BB	BB	BB	BB	BB	BB	BB	BB	BB	BB	BB	BB	BB	BB	BB	BB	BB	BB	BB	BB	BB	BB	BB	BB	BB	BB	BB	BB	BB	BB	BB	AB	BB	AB	BB	BB	AB	AB	AB	BB	AB	AB	BB
CEL-18_60214752	18	60214752	AA	AA	AA	AA	AA	AA	AA	AA	AA	AA	AA	AA	AA	AA	AA	AA	AA	AA	AA	AA	AA	AA	AA	AA	AA	AA	AA	AA	AA	AA	AA	AB	AB	AA	AA	AA	AA	AA	AB	AA	AB	AA	AA	AA	AA	AA	AB
rs8237402	18	62695790	AA	AA	AB	AA	AA	AA	AA	AA	AA	AA	AA	AA	AB	AA	AA	AB	AA	AA	AA	BB	AA	AA	AA	AA	AB	AB	BB	BB	AA	BB	AB	BB	AA	AB	AB	AB	BB	AB	AB	AB	AA	AA	AB	AB	AB	AB	AB
rs3720827	18	63808511	BB	BB	BB	BB	BB	BB	BB	AB	BB	BB	BB	BB	BB	AB	BB	BB	BB	AB	BB	BB	BB	AB	AA	AB	BB	BB	BB	BB	BB	AB	AB	AB	BB	BB	AB	BB	AB	BB	AB	AB	AB	AB	BB	AA	BB	BB	AB
rs3688789	18	65035105	BB	BB	BB	BB	BB	BB	BB	BB	BB	BB	BB	BB	BB	BB	BB	BB	BB	BB	BB	AA	BB	BB	BB	BB	AB	AB	AA	AA	BB	AB	AB	AB	BB	AA	AA	AB	AA	BB	AA	AA	AB	AB	AB	AA	AB	AB	AB
rs3691542	18	67000836	AA	AA	AA	AA	AA	AA	AA	AA	AA	AA	AA	AA	AA	AA	AA	AA	AA	AA	AA	BB	AA	AA	AA	AA	BB	AB	BB	BB	AA	AB	AB	BB	AB	AA	AA	AB	AB	AB	AA	AA	AA	AB	AB	AB	AB	AB	AA
rs3658163	18	69187029	BB	BB	AB	BB	BB	BB	BB	AA	BB	BB	AA	AB	BB	BB	BB	BB	AB	AB	BB	AA	BB	AB	AB	AB	AA	AB	AA	AA	BB	AB	AA	AA	AB	BB	AB	AB	BB	AA	AB	AB	AA	AA	AB	AB	AB	AB	AB
rs13483426	18	70651591	AA	AA	AA	AA	AA	AA	AA	AA	AA	AA	AA	AA	AA	AA	AA	AB	AA	AA	AA	AA	AA	AA	AA	AA	AA	AA	AA	AA	AA	AA	AA	AA	AA	AA	AA	AA	AA	AA	AA	AA	AA	AA	AA	AA	AA	AA	AA
rs6161154	18	71978261	AA	AA	AB	AA	AA	AA	AA	BB	AA	AA	BB	AB	AA	AA	AA	AA	AB	AB	AA	BB	AA	AB	AB	AA	AA	AA	AA	AA	AA	AA	AB	AB	AB	BB	AB	AB	BB	AA	AB	AB	AA	AB	AB	AB	AA	BB	AB
rs13483436	18	73957870	BB	BB	BB	BB	BB	BB	BB	BB	BB	BB	BB	BB	BB	BB	BB	BB	BB	BB	BB	BB	BB	BB	BB	BB	AB	BB	BB	BB	BB	AB	BB	AB	AB	AA	AA	AA	AA	AA	AA	AA	AA	AB	AA	AA	AA	AB	AA
rs13459193	18	75265583	AB	BB	AB	BB	AB	AB	AB	AA	BB	AB	AA	AB	AB	BB	BB	AA	AB	AB	BB	AA	BB	AA	AB	AB	AB	BB	BB	BB	BB	BB	AB	AB	BB	AA	AA	AA	AA	AA	AA	AA	AA	AA	AA	AA	AA	AA	AA
rs13483446	18	77080840	BB	BB	BB	BB	BB	BB	BB	BB	BB	BB	BB	BB	BB	BB	BB	BB	BB	BB	BB	BB	BB	BB	BB	BB	BB	BB	BB	BB	BB	BB	BB	AB	AB	BB	BB	BB	BB	BB	BB	BB	BB	BB	BB	BB	BB	BB	BB
rs3706601	18	77890660	AA	AA	AA	AA	AA	AA	AA	AA	AA	AA	AA	AA	AA	AA	AA	AA	AA	AA	AA	AA	AA	AA	AA	AA	AB	AB	AB	AA	AA	AA	AA	AB	AA	AA	AB	AB	BB	AB	BB	AB	BB	BB	AB	BB	AB	BB	BB
rs3720876	18	80361633	BB	AA	AB	AA	AB	AB	AB	BB	AA	AB	BB	BB	BB	AA	AA	BB	AB	AB	AA	AB	AA	BB	AB	AA	AA	AA	AA	AA	AA	AB	AB	AB	AB	BB	BB	BB	BB	BB	BB	BB	BB	BB	BB	BB	BB	BB	BB
rs13483462	18	81619936	BB	BB	BB	BB	BB	BB	BB	BB	BB	BB	BB	BB	BB	BB	BB	BB	BB	BB	BB	BB	BB	BB	BB	BB	BB	BB	BB	BB	BB	BB	BB	BB	BB	BB	BB	BB	BB	BB	BB	BB	BB	BB	BB	BB	BB	BB	BB
rs13483466	18	82712912	BB	AA	AA	AA	AA	AA	AA	AA	AA	AB	AA	AB	AB	AA	AA	AB	AA	AA	AA	AB	AA	AB	AA	AB	AA	AA	AA	AA	AA	AA	AA	AA	AA	AA	AA	AB	AA	AB	AA	AA	AA	AB	AB	AA	AB	AB	AA
mCV24836796	18	86034550	BB	AA	AA	AA	AA	AA	AA	AA	AA	AB	AA	AB	AB	AA	AA	AB	AA	AA	AA	AA	AA	AB	AA	AB	BB	AA	AA	AA	AA	AA	AA	BB	AB	BB	AB	BB	AB	AB	AB	AB	AA	AB	BB	AB	AB	BB	AB
rs13483482	18	86617418	AA	AA	AA	AA	AA	AA	AA	AA	AA	AA	AA	AA	AA	AA	AA	AA	AA	AA	AA	AB	AA	AA	AA	AA	AB	AB	AB	AA	AA	AB	AA	AB	AB	BB	AB	AB	AB	AA	AB	AB	AA	AA	AB	AB	AA	AB	AB
rs4137441	18	89120861	BB	BB	BB	BB	BB	BB	BB	BB	BB	BB	BB	BB	BB	BB	BB	BB	BB	BB	BB	BB	BB	BB	BB	BB	BB	BB	BB	BB	BB	BB	BB	BB	BB	BB	BB	BB	BB	BB	BB	BB	BB	BB	BB	BB	BB	BB	BB
rs3671671	19	4208173	AA	AB	AB	AA	AB	AB	AB	AA	BB	AA	AB	AA	AA	AB	AA	AA	AA	AB	AA	AA	AA	AA	AA	AB	AB	AB	AB	AB	AA	AB	AB	BB	AB	BB	AB	BB	BB	AB	AB	AB	AA	AA	AA	AB	AB	AB	AB
rs3713033	19	4818261	BB	AB	AB	BB	AB	AB	AB	BB	AA	BB	AB	BB	BB	AB	BB	BB	BB	AB	BB	AA	BB	BB	BB	AA	AB	AB	AB	AB	BB	AB	AB	AA	AB	BB	AB	AA	AA	AA	AB	BB	AB	AB	AA	AA	AA	AA	AA
CEL-19_5283144	19	5283144	BB	AB	AB	BB	AB	AB	AB	BB	AA	BB	AB	BB	BB	AB	BB	BB	BB	AB	BB	BB	BB	BB	BB	BB	AB	AB	AB	AB	BB	AB	AB	AA	AB	AA	AB	AB	BB	BB	AB	AA	BB	BB	BB	AB	AB	AB	AB
rs6236348	19	6000186	BB	BB	BB	BB	BB	BB	BB	BB	BB	BB	BB	BB	BB	BB	BB	BB	BB	BB	BB	AA	BB	BB	BB	BB	AB	AB	AB	BB	BB	BB	BB	AB	BB	BB	AB	AB	AA	AA	BB	BB	AB	AB	AA	AB	AB	BB	AB
rs13483525	19	9543124	AA	AA	AA	AA	AA	AA	AA	AA	AA	AA	AA	AA	AA	AA	AA	AA	AA	AA	AA	AA	AA	AA	AA	AA	AA	AA	AA	AA	AA	AA	AA	AA	AA	AA	AB	AB	BB	BB	AA	AA	AB	AB	BB	AB	AB	AA	AB
UT_19_10.709331	19	9813271	AB	BB	BB	AB	AB	AB	BB	AB	BB	AB	BB	AB	AB	AB	AB	AA	AB	AB	AB	BB	AB	AB	BB	BB	AA	AA	AA	AB	AB	BB	AB	AB	AB	AA	AB	AB	BB	BB	AA	AA	AB	AB	BB	AB	AB	AA	AB
rs6316813	19	10572580	AB	AA	AA	BB	AA	AA	AA	AB	AA	AB	AA	AB	AB	AB	AA	AB	AB	AB	AB	AA	AB	AB	AA	AA	AB	AB	AB	AB	AB	AA	AB	AA	AB	AA	AA	AA	AA	AA	AA	AA	AA	AA	AA	AA	AA	AA	AA
CEL-19_12595293	19	12595293	BB	BB	BB	BB	BB	BB	BB	BB	BB	BB	BB	BB	BB	BB	BB	BB	BB	BB	BB	AA	BB	BB	BB	BB	AB	AB	AB	BB	BB	AB	BB	AB	BB	BB	BB	AB	BB	BB	AB	BB	BB	AB	BB	AB	AB	AA	AB
rs13483540	19	14743248	AA	AA	AA	AA	AA	AA	AA	AA	AA	AA	AA	AA	AA	AA	AA	AA	AA	AA	AA	AA	AA	AA	AA	AA	AA	AA	AA	AB	AA	AA	AA	AB	AA	AA	AA	AA	AA	AA	AA	AA	AA	AA	AA	AA	AA	AA	AA
rs3686467	19	16159229	AB	BB	BB	AA	BB	BB	BB	AB	BB	AB	BB	AB	AB	AB	AB	AB	AB	AB	AB	BB	AB	AB	BB	AA	AB	AA	AB	BB	AB	BB	BB	AB	AB	BB	AB	BB	BB	AB	AB	BB	AA	AB	AA	AB	AB	BB	AB
rs6223359	19	17804343	AA	AA	AA	AA	AA	AA	AA	AA	AA	AA	AA	AA	AA	AA	AA	AA	AA	AA	AA	AA	AA	AA	AA	AA	AA	AA	AA	AA	AA	AA	AA	AA	AA	AA	AA	AA	AA	AA	AA	AA	AA	AA	AA	AA	AA	AA	AA
gnf19.017.711	19	19283950	AB	AA	AA	AB	AA	AA	AA	AB	AA	AB	AA	AB	AB	AB	AB	AB	AB	AB	AB	BB	AB	AB	AA	AA	AA	AB	AA	AB	AA	AA	AA	AB	AB	AA	AB	BB	BB	BB	BB	AA	AB	BB	BB	BB	BB	BB	AB
rs6372656	19	21112530	AB	BB	BB	AB	BB	BB	AB	AB	BB	AB	BB	AB	AB	AB	AB	AB	AB	AB	AB	BB	AB	AB	BB	AB	AB	AB	AB	AB	AB	AB	AB	BB	AA	BB	AB	AA	AA	AA	AA	BB	AB	AA	AA	AA	AA	AA	AB
rs6309315	19	22859563	BB	BB	BB	BB	BB	BB	BB	BB	BB	BB	BB	BB	BB	BB	BB	BB	BB	BB	BB	BB	BB	BB	BB	BB	BB	BB	AB	BB	BB	BB	BB	AB	BB	BB	BB	BB	BB	BB	BB	BB	AB	BB	BB	BB	BB	BB	AB
rs3720897	19	24396755	BB	BB	BB	BB	BB	BB	BB	BB	BB	BB	BB	BB	BB	BB	BB	BB	BB	BB	BB	BB	BB	BB	BB	BB	AB	AB	BB	BB	BB	BB	BB	BB	BB	AB	AA	AA	AA	AA	AA	AB	AA	AA	AA	AA	AA	AA	AA
rs6293693	19	25362165	AA	AA	AA	AA	AA	AA	AA	AA	AA	AA	AA	AA	AA	AA	AA	AA	AA	AA	AA	AA	AA	AA	AA	AA	AA	AA	AA	AA	AA	AA	AA	AA	AA	AA	AA	BB	BB	AB	AB	AA	AB	AB	AA	AB	AB	BB	BB
rs3090325	19	26007713	BB	BB	BB	BB	BB	BB	BB	BB	BB	BB	BB	BB	BB	BB	BB	BB	BB	BB	BB	BB	BB	BB	BB	AB	AB	BB	AB	AA	AB	BB	AB	AB	AB	AB	AB	BB	BB	BB	BB	AB	BB	BB	BB	BB	BB	BB	BB
UT_19_29.979736	19	29540192	BB	BB	BB	BB	BB	BB	BB	BB	BB	BB	BB	BB	BB	BB	BB	BB	BB	BB	BB	AA	BB	BB	BB	AB	AA	AB	AB	AB	AB	BB	AB	BB	AB	BB	BB	AA	AA	AA	AA	BB	AA	AA	AA	AA	AA	AA	AA
rs13459194	19	31358105	BB	BB	BB	BB	BB	BB	BB	BB	BB	BB	BB	BB	BB	BB	BB	BB	BB	BB	BB	BB	BB	BB	BB	BB	AB	BB	AB	AB	AB	BB	AB	BB	BB	BB	BB	BB	BB	BB	BB	BB	BB	BB	BB	BB	BB	BB	BB
rs6237466	19	31672951	AA	AA	AA	AA	AA	AA	AA	AA	AA	AA	AA	AA	AA	AA	AA	AA	AA	AA	AA	AA	AA	AA	AA	AA	AA	AA	AA	AA	AA	AB	AA	AA	AA	AA	AA	AA	AA	AB	AB	AA	AB	AB	BB	AB	AB	AA	AA
CEL-19_34542259	19	34542259	NN	AA	AA	AA	AA	AA	AA	AA	AA	AA	AA	AA	AA	AA	AA	AA	AA	AA	AA	AA	AA	AA	AA	AA	AA	AA	AA	AA	AA	AA	AA	AA	AA	AA	AA	AA	AA	AA	AA	AA	AA	AA	AA	AA	AA	AA	AA
gnf19.035.019	19	36467112	AA	AA	AA	AA	AA	AA	AA	AA	AA	AA	AA	AA	AA	AA	AA	AA	AA	AA	AA	AA	AA	AA	AA	AA	AA	AA	AA	AA	AA	AA	AA	AA	AA	AA	AA	AA	AA	AA	AA	AA	AA	AA	AA	AA	AA	AA	AA
rs3710829	19	37393165	AA	AA	AA	AA	AA	AA	AA	AA	AA	AA	AA	AA	AA	AA	AA	AA	AA	AA	AA	BB	AA	AA	AA	NN	AA	AA	AA	AA	AA	AA	AA	AA	AA	AA	AA	AA	AA	AA	AA	AA	AA	AA	AA	AA	AA	AA	AA
rs3655407	19	39594395	BB	BB	BB	BB	BB	BB	BB	BB	BB	BB	BB	BB	BB	BB	BB	BB	BB	BB	BB	AA	BB	BB	BB	AB	AA	AA	AA	AB	AB	BB	AB	AB	AB	AB	BB	AB	AA	BB	BB	AB	BB	BB	AB	BB	BB	BB	BB
rs3656289	19	41749395	AA	AA	AA	AA	AA	AA	AA	AA	AA	AA	AA	AA	AA	AA	AA	AA	AA	AA	AA	AA	AA	AA	AA	AA	AB	AB	AB	AB	AB	AB	AB	AA	AB	AA	AA	AB	BB	AB	AB	AA	AB	AB	BB	AB	AB	AA	AA
rs3687275	19	42406846	BB	BB	BB	BB	BB	BB	BB	BB	BB	BB	BB	BB	BB	BB	BB	BB	BB	BB	BB	BB	BB	BB	BB	AB	AB	AB	AA	AB	AB	BB	AB	AB	AB	BB	AB	AB	BB	AB	AB	BB	AB	AB	BB	AB	AB	AA	AA
rs13483643	19	44651448	BB	BB	BB	AB	BB	AB	AA	AB	BB	AB	BB	AB	BB	AB	AB	AB	AB	AB	AB	AA	AB	BB	BB	AA	AA	AA	AA	AA	AA	AA	AA	AA	AB	AA	AA	AA	AA	AA	AA	AA	AA	AA	AA	AA	AA	AA	AA
mCV23390953	19	45356002	AA	AA	AA	AA	AA	AA	AA	AA	AA	AA	AA	AA	AA	AA	AA	AA	AA	AA	AA	AA	AA	AA	AA	AB	AA	AA	AB	AB	AA	AA	AA	BB	AA	AB	AB	AB	BB	AB	AB	AB	AB	AB	BB	AB	AB	AA	AA
rs3023496	19	47482330	AA	AA	AA	AA	AA	AA	AA	AA	AA	AA	AA	AA	AA	AA	AA	AA	AA	AA	AA	AA	AA	AA	AA	AB	AB	AB	AB	AB	AB	AB	AB	AA	BB	BB	BB	BB	BB	BB	BB	BB	BB	BB	BB	BB	BB	BB	BB
rs6194426	19	49475053	AA	AA	AA	AA	AA	AA	AA	AA	AA	AA	AA	AA	AA	AA	AA	AA	AA	AA	AA	AA	AA	AA	AA	AB	BB	BB	AB	AB	AB	AB	AB	AA	AA	AB	AB	AB	AA	BB	BB	AB	BB	BB	AB	BB	BB	BB	BB
mCV23069572	19	52162185	AA	AA	AA	AA	AA	AA	AA	AA	AA	AA	AA	AA	AA	AA	AA	AA	AA	AA	AA	AA	AA	AA	AA	AB	BB	BB	AB	AB	AB	AB	AB	AA	AA	BB	BB	AB	BB	BB	BB	BB	AB	AB	BB	BB	AB	AB	AB
rs6304326	19	52797648	BB	BB	BB	BB	BB	BB	BB	BB	BB	BB	BB	BB	BB	BB	BB	BB	BB	BB	BB	BB	BB	BB	BB	BB	BB	BB	BB	BB	BB	AB	BB	BB	BB	AB	BB	AB	BB	AA	AA	AB	AA	AA	BB	AA	AB	AA	AA
rs6211533	19	56380821	BB	BB	BB	BB	BB	BB	AB	BB	BB	BB	BB	BB	BB	AB	BB	AB	BB	BB	BB	BB	BB	BB	BB	BB	BB	BB	BB	BB	AB	BB	BB	BB	BB	BB	BB	BB	BB	BB	BB	BB	BB	BB	BB	BB	BB	BB	BB
rs6191324	19	58720409	AA	AA	AA	AA	AA	AA	AA	AA	AA	AA	AA	AA	AA	AA	AA	AA	AA	AA	AA	AA	AA	AA	AA	AA	AB	AB	AB	AB	AB	AB	AB	AA	AA	AB	AA	AA	BB	BB	AB	AB	BB	BB	AB	BB	AA	BB	BB
[truncated: 386 more columns]
