# Supplementary material for: The ecology of immune state in a wild mammal, Mus musculus domesticus
Source: PLoS Biol. 2018 Apr 13;16(4):e2003538. doi: 10.1371/journal.pbio.2003538 (PMC5919074; doi:10.1371/journal.pbio.2003538)
Supplement: S5 Data — For sample site HW, correlations (2-tailed) among measures of infection, condition, and immune responses, with males above the diagonal and females below the diagonal. Cells are colour coded as red for p < 0.01 and green for 0.01 < p < 0.05. Daylight is a measure of the Season when mice were caught, specifically the number of minutes of daylight between sunrise and sunset; Age is mouse age in weeks; Mites is the number of mites; Microbe is the number of microbial infections; Worms is the number of Syphacia sp.; BMI and SMI are the body mass index and the scaled mass index, respectively; Ab Fat is the mass of abdominal fat; Leptin is its serum concentration; Haemoglobin is its concentration; immunoglobulin (Ig) G, IgE and IgA are the concentration of these antibodies as described in [1]; and the numbers of CD4+ T cells, CD8+ T cells, CD19+ B cells, NKp46+ natural killer (NK) cells, Ly6G+ neutrophils, CD11c+ dendritic cells (DCs), and F4/80+ macrophages, which have all been scaled (prefix ‘s’) as for SMI, all as described in the Methods. (XLSX) [file pbio.2003538.s005.xlsx]

## Sheet: HW
		Daylight	Age	Mass	Mites	Microbe	Worms	BMI	SMI	Ab Fat	Leptin	Haemoglobin	IgG	IgE	IgA	sCD4	sCD8	sCD19	sNKp46	sLy6G	sCD11c	sF480
Coefficient	Daylight	1	-.246*	-.235*	.254*	-.227*	-0.083	-.282**	-.212*	-.250*	.382**	-0.057	0.027	0.011	-0.144	-0.173	-0.186	-0.21	-0.153	-0.111	-0.16	-0.119
P value			0.014	0.019	0.011	0.039	0.413	0.005	0.035	0.013	0.004	0.573	0.795	0.913	0.256	0.167	0.138	0.076	0.2	0.372	0.2	0.343
N		81	99	99	99	83	100	99	100	99	56	100	96	96	64	65	65	72	72	67	66	66
Coefficient	Age	-.232*	1	.801**	-.330**	0.215	0.041	.594**	.235*	.487**	0.02	.425**	0.2	.317**	0.225	-0.07	-0.151	-0.085	-0.063	-0.027	-0.202	-0.151
P value		0.039		0	0.001	0.052	0.688	0	0.019	0	0.883	0	0.052	0.002	0.076	0.582	0.233	0.483	0.6	0.828	0.106	0.231
N		80	80	98	98	82	99	98	99	98	55	99	95	95	63	64	64	71	71	66	65	65
Coefficient	Mass	-.354**	.839**	1	-.373**	.332**	0.154	.733**	.271**	.659**	0.174	.385**	0.133	.218*	.388**	-0.14	-0.177	-.243*	-0.158	-0.179	-.285*	-.377**
P value		0.001	0		0	0.002	0.129	0	0.007	0	0.198	0	0.2	0.034	0.002	0.272	0.161	0.041	0.189	0.149	0.021	0.002
N		81	80	81	98	83	99	99	99	98	56	99	95	95	63	64	64	71	71	66	65	65
Coefficient	Mites	.300**	-.365**	-.462**	1	-.241*	0.082	-.246*	-0.072	-.218*	0.251	-.227*	0.063	-0.077	-0.131	0.081	0.181	-0.004	0.07	0.175	0.067	0.101
P value		0.007	0.001	0		0.029	0.418	0.014	0.479	0.031	0.062	0.024	0.545	0.456	0.304	0.524	0.153	0.971	0.563	0.161	0.594	0.423
N		79	79	79	79	82	99	98	99	98	56	99	95	95	64	64	64	71	71	66	65	65
Coefficient	Microbe	-.325**	.243*	.337**	-.389**	1	-0.021	.220*	0.062	0.206	0.055	.380**	0.179	.246*	0.229	-0.015	-0.071	0.122	-0.13	-0.199	0.046	-0.167
P value		0.007	0.047	0.005	0.001		0.852	0.046	0.576	0.062	0.689	0	0.111	0.028	0.11	0.913	0.601	0.35	0.316	0.127	0.736	0.214
N		68	67	68	66	70	83	83	83	83	56	83	80	80	50	56	56	61	62	60	57	57
Coefficient	Worms	-.261*	.386**	.336**	-0.193	.329**	1	0.191	0.16	0.191	.389**	-0.094	-0.046	0.03	0.096	-0.017	0.052	-0.137	-0.035	-0.122	-0.114	-0.14
P value		0.019	0	0.002	0.088	0.006		0.058	0.111	0.059	0.003	0.35	0.659	0.77	0.452	0.896	0.679	0.249	0.768	0.324	0.362	0.261
N		81	80	81	79	68	81	99	100	99	56	100	96	96	64	65	65	72	72	67	66	66
Coefficient	BMI	-.374**	.703**	.777**	-.354**	0.162	0.21	1	.849**	.393**	0.131	0.167	0.065	0.047	.282*	.450**	.374**	0.217	.298*	.297*	0.172	0
P value		0.001	0	0	0.001	0.187	0.06		0	0	0.335	0.099	0.53	0.652	0.025	0	0.002	0.069	0.012	0.015	0.171	0.997
N		81	80	81	79	68	81	81	99	98	56	99	95	95	63	64	64	71	71	66	65	65
Coefficient	SMI	-.329**	.461**	.486**	-.236*	0.065	0.116	.888**	1	0.076	0.052	-0.069	-0.012	-0.082	0.1	.636**	.560**	.453**	.474**	.534**	.425**	.260*
P value		0.003	0	0	0.038	0.599	0.306	0		0.455	0.701	0.496	0.904	0.427	0.434	0	0	0	0	0	0	0.035
N		80	79	80	78	67	80	80	80	99	56	100	96	96	64	65	65	72	72	67	66	66
Coefficient	Ab Fat	-0.153	.657**	.686**	-.268*	0.25	.358**	.495**	.278*	1	.456**	.378**	0.033	.264**	.490**	-.287*	-.253*	-.350**	-0.221	-.271*	-.285*	-.312*
P value		0.21	0	0	0.028	0.055	0.003	0	0.022		0	0	0.753	0.009	0	0.02	0.042	0.003	0.062	0.027	0.02	0.011
N		69	68	69	67	60	69	69	68	69	56	99	96	96	63	65	65	72	72	67	66	66
Coefficient	Leptin	0.062	.404**	.432**	0.141	-0.052	-0.081	.365*	0.255	.319*	1	-0.03	.306*	0.17	0.183	-0.081	-0.019	-0.032	0.175	-0.056	-0.035	-0.015
P value		0.683	0.006	0.003	0.361	0.739	0.591	0.013	0.091	0.037		0.826	0.023	0.215	0.361	0.606	0.905	0.837	0.257	0.716	0.826	0.925
N		46	45	46	44	44	46	46	45	43	46	56	55	55	27	43	43	43	44	44	41	41
Coefficient	Haemoglobin	-.416**	0.102	.282*	-0.17	0.194	-0.023	0.187	0.044	0.215	0.058	1	0.119	.215*	0.213	-0.242	-0.211	-.348**	-0.201	-0.143	-.354**	-.408**
P value		0	0.37	0.011	0.138	0.116	0.838	0.097	0.697	0.079	0.707		0.247	0.036	0.091	0.052	0.092	0.003	0.09	0.25	0.004	0.001
N		80	79	80	78	67	80	80	80	68	45	80	96	96	64	65	65	72	72	67	66	66
Coefficient	IgG	-0.208	.493**	.502**	-0.127	0.21	0.075	.489**	.337**	.373**	.526**	.314**	1	.234*	0.022	-0.142	-0.079	-0.008	-0.035	-0.11	-0.15	0.053
P value		0.066	0	0	0.272	0.086	0.514	0	0.003	0.002	0	0.005		0.022	0.866	0.264	0.533	0.949	0.773	0.378	0.234	0.673
N		79	78	79	77	68	79	79	78	68	46	78	79	96	60	64	64	71	71	66	65	65
Coefficient	IgE	-0.058	.351**	.346**	-0.207	0.186	0.028	.306**	0.208	0.069	-0.081	0.054	.346**	1	0.003	-0.163	-0.197	-0.094	-0.194	-0.179	-0.132	-0.186
P value		0.61	0.002	0.002	0.071	0.13	0.803	0.006	0.068	0.578	0.592	0.637	0.002		0.982	0.197	0.118	0.435	0.106	0.152	0.294	0.139
N		79	78	79	77	68	79	79	78	68	46	78	79	79	60	64	64	71	71	66	65	65
Coefficient	IgA	-.491**	.345*	.461**	-.382*	.564**	0.236	.322*	0.11	0.107	-0.01	.467**	0.189	0.025	1	-0.1	-0.133	-0.197	-0.048	-0.126	-0.214	-0.262
P value		0.001	0.022	0.001	0.011	0.001	0.119	0.031	0.474	0.542	0.972	0.001	0.219	0.871		0.561	0.44	0.195	0.762	0.433	0.186	0.102
N		45	44	45	44	34	45	45	45	35	16	45	44	44	45	36	36	45	42	41	40	40
Coefficient	sCD4	-0.222	-.283*	-.353*	.303*	-.345*	-0.134	0.14	.487**	-0.232	-0.05	-0.111	-0.111	-0.091	-0.293	1	.890**	.772**	.652**	.732**	.710**	.611**
P value		0.121	0.049	0.012	0.036	0.018	0.353	0.332	0	0.116	0.771	0.443	0.443	0.528	0.186		0	0	0	0	0	0
N		50	49	50	48	47	50	50	50	47	37	50	50	50	22	50	65	58	60	58	56	56
Coefficient	sCD8	-0.182	-.286*	-.385**	.328*	-.304*	-0.081	0.087	.438**	-0.269	-0.076	-0.084	-0.128	-0.066	-0.289	.928**	1	.673**	.781**	.707**	.743**	.654**
P value		0.206	0.046	0.006	0.023	0.038	0.574	0.547	0.001	0.067	0.655	0.563	0.374	0.648	0.192	0		0	0	0	0	0
N		50	49	50	48	47	50	50	50	47	37	50	50	50	22	50	50	58	60	58	56	56
Coefficient	sCD19	-.279*	-.276*	-.429**	.374**	-.297*	-0.051	0.016	.349**	-0.222	-0.261	-0.142	0.059	0.025	-0.333	.671**	.704**	1	.536**	.540**	.713**	.724**
P value		0.038	0.041	0.001	0.005	0.035	0.71	0.905	0.009	0.107	0.124	0.3	0.668	0.853	0.078	0	0		0	0	0	0
N		56	55	56	55	51	56	56	55	54	36	55	56	56	29	43	43	56	65	60	66	66
Coefficient	sNKp46	-0.239	-0.247	-.275*	0.237	-.287*	-0.148	0.119	.416**	-0.227	-0.215	-0.048	-0.134	-0.089	-0.148	.849**	.850**	.814**	1	.831**	.817**	.689**
P value		0.076	0.069	0.04	0.084	0.043	0.275	0.383	0.001	0.109	0.215	0.724	0.326	0.514	0.462	0	0	0		0	0	0
N		56	55	56	54	50	56	56	56	51	35	56	56	56	27	46	46	47	56	60	59	59
Coefficient	sLy6G	-0.148	-.316*	-.428**	.689**	-.450**	-0.117	-0.042	.304*	-.349*	-0.031	-0.229	-0.003	-0.115	-0.394	.696**	.691**	.872**	.803**	1	.660**	.695**
P value		0.309	0.029	0.002	0	0.002	0.425	0.776	0.033	0.015	0.859	0.114	0.982	0.431	0.063	0	0	0	0		0	0
N		49	48	49	47	46	49	49	49	48	35	49	49	49	23	44	44	43	46	49	60	60
Coefficient	sCD11c	-0.194	-0.228	-.429**	.601**	-.328*	-0.114	0.031	.349*	-.296*	-0.018	-0.175	0.1	-0.012	-0.355	.558**	.629**	.826**	.667**	.875**	1	.759**
P value		0.177	0.114	0.002	0	0.026	0.43	0.833	0.014	0.039	0.919	0.229	0.49	0.936	0.089	0	0	0	0	0		0
N		50	49	50	49	46	50	50	49	49	35	49	50	50	24	41	41	49	42	44	50	66
Coefficient	sF480	-0.169	-0.202	-.421**	0.146	-.297*	-0.024	-0.058	0.241	-.297*	-0.222	-0.076	-0.042	0.013	-0.402	.595**	.599**	.765**	.727**	.802**	.615**	1
P value		0.241	0.165	0.002	0.316	0.045	0.868	0.689	0.095	0.038	0.201	0.605	0.775	0.928	0.051	0	0	0	0	0	0
N		50	49	50	49	46	50	50	49	49	35	49	50	50	24	41	41	49	42	44	50	50
	* Correlation is significant at the 0.05 level (2-tailed).
	** Correlation is significant at the 0.01 level (2-tailed).
