# Supplementary material for: The ecology of immune state in a wild mammal, Mus musculus domesticus
Source: PLoS Biol. 2018 Apr 13;16(4):e2003538. doi: 10.1371/journal.pbio.2003538 (PMC5919074; doi:10.1371/journal.pbio.2003538)
Supplement: S6 Data — Physical characteristics of all mice, where column A is the mouse ID number; column B is the date the mouse was captured; and column C the date it was killed, with the days in captivity shown in column D; column E is the site where it was caught, where 1 is BM, 2 is HW, 3 is LU, 4 is WF, 7 is GL, 8 is WT, 9 is PF, 10 is ST, 11 is JB, 12 is PH, 13 is SP, and 14 is SK, as in Fig 1; column F is the number of minutes of daylight, between sunrise and sunset, on the day that mouse was caught; column G is its sex, where 1 is female and 2 is male; columns E–K, inclusive, are these sizes in mm; columns L–N, inclusive are these masses in g; column O are the number of these cells determined as described before [1]; columns P–S, inclusive, are these masses in g; column T is in mg; column U is in weeks calculated as described in the Methods; columns V and W are in g/L and ng/mL, respectively; and column X and Y are body mass index and scaled mass index, respectively, as described in the Methods. Blank cells are where these data are not available. (XLSX) [file pbio.2003538.s006.xlsx]

## Sheet: All mice
ID	Date Captured	Date Killed	Days Captive	Site	Daylight	Sex	Body Length	Tail Length	Skull Length	Skull Width	Mass Trapped	Mass less Foetuses	Spleen	Viable Spleen Cells	Liver	Kidney	Abdominal Fat	Heart & Lungs	Paired Eye Lens	Age	Haemoglobin	Leptin	BMI	SMI
1	2012-03-27	2012-04-19	23	1	756	1	87	82	22.06	12.11	21.97	23	0.041		1.423	0.377	0.514	0.317	8.86667	56.3856	157	6.29086	3.03871	12.5135
2	2012-04-12	2012-04-19	7	1	819	2	63	58	17.91	9.92	8	10	0.016		0.613	0.119	0.093	0.139	4.26667	5.47139	141		2.51953	13.9629
3	2012-04-03	2012-04-19	16	2	784	2	74	71	19.4	10.05	12	14	0.023		0.68	0.201	0.252	0.218	4.9	7.8927	156	12.1943	2.55661	12.2186
4	2012-04-03	2012-04-19	16	2	784	2	70	69	18.98	10.36	10	10	0.017		0.615	0.177	0.068	0.22	4.53333	6.41618	140		2.04082	10.2651
5	2012-04-03	2012-04-19	16	2	784	1	67	64	18.47	10.09	7	11	0.017		0.551	0.092	0.201	0.147	4.13333	5.29306	138		2.45043	12.8322
6	2012-04-03	2012-04-19	16	2	784	2	70	70	20.18	10.11	12	14	0.017		0.904	0.18	0.252	0.251	4.33333	5.69816	138		2.85714	14.3711
7	2012-04-04	2012-04-19	15	1	788	2	78	65	19.75	11.2	15	16	0.022		0.844	0.208	0.211	0.258	5.4	10.2921	157		2.62985	11.9744
8	2012-04-04	2012-04-19	15	1	788	2	74	73	21.19	10.94	12	16	0.028		0.812	0.239	0.185	0.235	5.6	11.3957	147	10.3094	2.92184	13.9641
9	2012-04-17	2012-04-19	2	2	838	2	76	75	20.52	10.29	14	14	0.012		0.733	0.214	0.014	0.237	4.76667	7.33038	144	1.67467	2.42382	11.3032
10	2012-04-17	2012-04-19	2	1	838	2	78	71	21.35	11.01	16	18	0.039		1.084	0.263	0.08	0.292	4.46667	6.17038	152	0.685744	2.95858	13.4712
11	2012-04-17	2012-04-19	2	1	838	1	81	69	21.55	11.19	20	17.4	0.034		1.266	0.276	0.018	0.355	6	14.9626	124	0.712673	2.65203	11.6633
12	2012-04-18	2012-04-19	1	1	843	1	67	67	19.31	10.68	10	10	0.013		0.523	0.183	0.009	0.156	3.9	4.53384	157		2.22767	11.6657
13	2012-04-18	2012-04-19	1	1	843	1	82	73	20.85	11.56	17	15	0.02		0.623	0.251	0	0.255	6.9	23.1266	111	0.536426	2.23081	9.7007
14	2012-04-19	2012-04-19	0	1	846	1	80	74	21.49	11.65	24	16.37	0.038		0.936	0.282	0	0.393	6.66667	20.7061	106		2.55781	11.3782
15	2012-04-19	2012-04-19	0	1	846	2	75	76	21.32	11.78	17.5	17.5	0.03		0.802	0.307	0	0.357	7.93333	33.638	145	0.72648	3.11111	14.6861
16	2012-04-19	2012-04-19	0	2	846	1	76	69	19.52	10.39	11.4	11.4	0.027		0.532	0.16	0.036	0.208	4.3	5.88267	133	1.15909	1.97368	9.20402
17	2012-04-19	2012-04-19	0	1	846	1	59	60	19.05	10.2	7.3	7.3	0.018		0.316	0.101	0	0.178	3.6	3.66067	134		2.0971	12.3448
18	2012-04-19	2012-04-19	0	2	846	2	68	68	19.64	10.04	11.2	11.2	0.022		0.565	0.11	0.038	0.34	4.16667	5.14246	132		2.42215	12.5124
19	2012-04-19	2012-04-19	0	1	846	1	66	62	18.93	10.22	9.5	9.5	0.028		0.458	0.147	0.005	0.213	4.13333	5.29306	159		2.1809	11.5799
20	2012-04-19	2012-04-19	0	1	846	2	77	73	21.56	11.1	16.3	16.3	0.03		0.803	0.208	0.023	0.338	5.56667	11.2056	151	0.759586	2.7492	12.6673
21	2012-05-11	2012-05-11	0	3	924	2	79	87	21.84	11.05	18	18					0		7.2	24.3011	143		2.88415	12.9793
22	2012-05-11	2012-05-11	0	3	924	2	78		20.57	10.68	18	18					0.191		7.06667	22.8805	150		2.95858	13.4712
23	2012-05-04	2012-05-16	12	4	901	1	74	70	19.89	10.63	12	14		7400000	0.713	0.195	0.325	0.201	5.76667	13.3026	162	11.9012	2.55661	12.2186
26	2012-05-10	2012-05-16	6	7	921	2	75	80	21.62	10.44	18	20	0.047	15600000	1.072	0.291	0.31	0.241	7.4	26.5804	134	3.36037	3.55556	16.7842
27	2012-06-21	2012-06-26	5	8	998	2	63	51	18.29	10.17	8	10.5	0.048	9400000	0.637	0.18	0.082	1.532	3.86667	4.23159	122		2.6455	14.661
28	2012-06-26	2012-06-26	0	1	996	1	74	74	21.72	11.46	15.5	15.361	0.045	8000000	0.871	0.24	0.021	0.327	6.5	19.1165	148		2.80515	13.4064
29	2012-06-26	2012-06-26	0	1	996	1	78	73	21.13	11.39	18	18	0.041	12200000	0.998	0.237	0.05	0.302	5.9	14.2313	135	1.4739	2.95858	13.4712
30	2012-06-26	2012-06-26	0	1	996	2	68	70	21.28	10.78	14.7	14.7	0.034	8800000	0.627	0.274	0.018	0.28	5.5	10.8328	130	0.45819	3.17907	16.4225
31	2012-06-26	2012-06-26	0	1	996	2	70	67	18.61	10.2	10.3	10.3	0.02	2200000	0.396	0.161	0.055	0.2	5	8.33471	142		2.10204	10.573
32	2012-06-27	2012-06-28	1	1	996	1	70	67	19.04	10.25	10	9.2	0.013	1200000	0.41	0.169	0.112	0.188	6	14.9626	153		1.87755	9.44387
33	2012-06-27	2012-06-28	1	1	996	1	89	88	21.88	11.71	18	14.535	0.02	3400000	0.853	0.257	0	0.312	6.13333	15.9867	81		1.835	7.40022
34	2012-06-27	2012-06-28	1	1	996	2	80	74	20.18	10.11	10	11.5	0.017	3600000	0.714	0.262	0.015	0.206	4.6	6.66867	150	1.61685	1.79688	7.99325
35	2012-06-27	2012-06-28	1	1	996	1	78	77	21.7	11.39	13	17.1	0.027	6800000	0.78	0.262	0.07	0.3	6.8	22.0602	147	1.69142	2.81065	12.7976
36	2012-06-29	2012-07-02	3	7	995	1	89	89	21.86	11.55	21	19.449	0.066	25800000	1.175	0.243	0.123	0.386	6.53333	19.4256	109	1.13941	2.45537	9.90209
37	2012-06-28	2012-07-02	4	7	995	1	70	68	20.19	10.83	13	13.5	0.042	20400000	0.802	0.178	0.05	0.261	4.16667	5.40771	127		2.7551	13.8579
38	2012-06-28	2012-07-02	4	7	995	2	73	74	21.46	11.57	16	17.6	0.028	17800000	1.005	0.275	0.172	0.33	5.46667	10.6502	130	2.13347	3.30268	15.983
39	2012-06-28	2012-07-02	4	7	995	2	65	70	20.48	10.13	9	8.3	0.016	1200000	0.422	0.124		0.172	4.03333	4.72401	165		1.9645	10.5784
40	2012-06-29	2012-07-03	4	7	995	1	65	63	18.44	10.51	8	8	0.016	15400000	0.512	0.136	0.032	0.173	3.7	3.93962	134		1.89349	10.196
41	2012-07-03	2012-07-03	0	1	991	2	75	69	20.51	10.47	13.11	13.11	0.026	3200000	0.664	0.242		0.236	4.63333	6.79748	160	0.320586	2.33067	11.002
42	2012-06-29	2012-07-03	4	8	995	2	74	70	21.13	11.94	19	19.5	0.028	4800000	1.157	0.391	0.114	0.365	7.3	25.4178	141	0.52612	3.56099	17.0187
43	2012-06-28	2012-07-03	5	7	995	1	70	71	20.11	11.07	12	12.5	0.016	12600000	0.711	0.196	0.07	0.233	3.76667	4.13218	138	2.10207	2.55102	12.8313
44	2012-07-03	2012-07-03	0	1	991	1	61	60	19.05	10.66	8	8	0.024	11600000	0.342	0.124		0.134	3.53333	3.4811	108		2.14996	12.2737
45	2012-07-06	2012-07-09	3	4	987	2	71	70	20.19	10.67	12	14.1	0.031	15800000	0.836	0.231	0.102	0.232	4.53333	6.41618	61	6.78866	2.79706	13.8865
46	2012-07-04	2012-07-09	5	1	989	2	58	51	20.1	10.24	8	10	0.035	23800000	0.796	0.167		0.217	4.26667	5.47139	145		2.97265	17.7762
47	2012-07-06	2012-07-09	3	4	987	2	73	65	20.22	10.87	12.5	15.2	0.037	24400000	1.124	0.227	0.13	0.26	4.63333	6.79748	151	3.75464	2.85232	13.8035
48	2012-07-10	2012-07-10	0	2	981	2	72	44	21.67	10.95	15.5	15.5	0.033	36600000	0.701	0.182	0.14	0.238	4.76667	7.33038	127		2.98997	14.6544
49	2012-07-10	2012-07-10	0	2	981	1	62	65	19.37	9.82	9.3	9.3	0.018		0.416	0.112		0.179	3.73333	4.03523	143		2.41935	13.6065
50	2012-07-10	2012-07-10	0	2	981	2	74	73	20.26	11.18	13.2	13.2	0.028	4600000	0.561	0.2	0.039	0.222	4.43333	6.04994	133		2.41052	11.5204
51	2012-07-10	2012-07-10	0	2	981	1	66	62	18.72	10	7.3	7.3	0.013	5600000	0.352	0.103		0.169	3.46667	3.30647	100		1.67585	8.89822
52	2012-07-10	2012-07-10	0	2	981	2	73	74	20.16	10.99	11.4	11.4	0.037	35600000	0.649	0.137	0.055	0.229	3.9	4.32745	127		2.13924	10.3526
53	2012-07-10	2012-07-10	0	2	981	1	60	73	18.81	10.2	9.4	9.4	0.013	4800000	0.444	0.097		0.198	3.13333	2.5029	138		2.61111	15.1347
54	2012-07-10	2012-07-12	2	2	981	1	64	65	19.29	10.04		7.9	0.016		0.367	0.126		0.136	3.66667	3.84533	122		1.92871	10.5349
55	2012-07-11	2012-07-12	1	2	979	1	72	68	19.26	10.85	11	9.3	0.032	1400000	0.458	0.18		0.242	3.86667	4.43131	140		1.79398	8.79267
56	2012-07-11	2012-07-12	1	9	979	1	66	66	20.08	10.73	8	8.5	0.021	5200000	0.399	0.137		0.178	2.76667	1.73944	153		1.95133	10.3609
57	2012-07-11	2012-07-12	1	2	979	2	60	51	19.41	10.24	8	8.8	0.021	8200000	0.395	0.291	0.01	0.207	3.5	3.25793	142		2.44444	14.1687
58	2012-07-11	2012-07-16	5	2	979	1	78	84	22.41	14	18	21	0.07	23200000	1.514	0.291	0.479	0.412	6.43333	18.5111	123	16.8021	3.45168	15.7163
59	2012-07-12	2012-07-16	4	7	977	1	74	85	20.8	11.67	14	17.64	0.026	9200000	1.603	0.238	0.085	0.254	4.4	6.25671	118	14.3699	3.22133	15.3954
60	2012-07-12	2012-07-16	4	7	977	1	63	67	19.37	10.72	10	12.3	0.034	8200000	0.787	0.154		0.226	2.1	0.619035	141	6.97964	3.09902	17.1743
61	2012-07-12	2012-07-16	4	7	977	1	75	89	22.14	11.6	20	22.2	0.036	20600000	1.615	0.342	0.462	0.344	7.1	25.3983	123	3.03815	3.94667	18.6304
62	2012-07-13	2012-07-17	4	7	975	1	78	81	21.78	11.76	21	20.2	0.027	5800000	1.522	0.304	0.32	0.368	6.86667	22.7662	149	8.16973	3.32018	15.1176
63	2012-07-13	2012-07-17	4	7	975	2	72	72	20.74	11.15	12	14.4	0.057	35200000	0.962	0.207	0.126		3.93333	4.4246	135	2.3619	2.77778	13.6144
64	2012-07-13	2012-07-17	4	9	975	2	63	65	20.3	10.69	9	11	0.028	7400000	0.619	0.16	0.119	0.232	3.26667	2.70918	143		2.77148	15.3591
65	2012-07-13	2012-07-17	4	9	975	1	64	69	19.65	10.4	9	11.7	0.01	7200000	0.59	0.172	0.024	0.236	2.86667	1.93616	153		2.85645	15.6023
66	2012-07-13	2012-07-17	4	7	975	2	58	58	18.57	9.67	7	8.25	0.016	14200000	0.393	0.106	0.039	0.211	1.83333	0.267032	153		2.45244	14.6654
67	2012-07-17	2012-07-17	0	2	966	1	50	42			3.3	3.3	0.008		0.104	0.55		0.107	3.2	2.65477	113		1.32	9.04836
68	2012-07-18	2012-07-19	1	2	964	1	67	71	19.39	10.03	11	11.3	0.016	9400000	0.605	0.151	0.005	0.171	4.26667	5.76143	133		2.51726	13.1822
69	2012-07-18	2012-07-19	1	2	964	1	63	64	16.87	9.55	9	8.73	0.016	6800000	0.408	0.148		0.141	3.1	2.42855	139		2.19955	12.1896
70	2012-07-17	2012-07-19	2	2	966	2	48	50	15.09	9.54	6	5.7	0.012		0.279	0.375	0.013	0.139	2.55	1.31301	117		2.47396	17.6075
71	2012-07-17	2012-07-19	2	2	966	1	56	60	16.88	9.59	7	7.8	0.011	8400000	0.36	0.136	0.007	0.188	3.1	2.42855	105		2.48724	15.3615
72	2012-07-17	2012-07-19	2	2	966	2	57	61	17.46	9.85	8	9.1	0.016	6000000	0.541	0.115	0.016	0.166	3.4	3.01642	144		2.80086	17.019
73	2012-07-20	2012-07-30	10	9	959	2	66	69	19.45	10.55	9	12.3	0.02	6600000	0.548	0.171	0.177	0.274	3.86667	4.23159	166		2.82369	14.9929
74	2012-07-19	2012-07-30	11	7	962	2	68	70	19.43	10.3	6	14.8	0.054	29000000	0.932	0.192	0.19	0.31	3.46667	3.17635	130		3.20069	16.5342
75	2012-07-20	2012-07-30	10	7	959	2	74	71	19.14	10.11	8	15.4	0.059	15800000	1.035	0.216	0.233	0.27	4	4.62286	146	5.87817	2.81227	13.4404
76	2012-07-25	2012-07-30	5	10	946	1	65	66	17.87	9.92	8	9.3	0.018	10400000	0.123	0.541	0.051	0.151			136	7.10352	2.20118	11.8529
77	2012-07-25	2012-07-31	6	10	946	2	75	81	20.63	10.64	13	16.6	0.023	12000000	0.916	0.253	0.303	0.308	6.96667	21.864	159	8.56835	2.95111	13.9309
78	2012-07-24	2012-07-31	7	10	949	2	73	66	20.73	11.66	17	18.3	0.032	15800000	1.118	0.268	0.246	0.334	5.3	9.77282	159	9.15797	3.43404	16.6187
79	2012-07-19	2012-07-31	12	7	962	1	77	83	20.98	11.39	20	20.822	0.065	60000000	1.53	0.274		0.377	4.46667	6.51492	151	0.998321	3.51189	16.1815
80	2012-07-31	2012-08-06	6	10	928	1	67	73	20.36	10.05	14	15	0.03	40000000	0.988	0.167	0.044	0.284	5.43333	11.1958	115	5.18906	3.3415	17.4985
81	2012-08-02	2012-08-06	4	4	922	1	65	32	19.05	10.32	9	10.2	0.026	9400000	0.524	0.13	0.099	0.2	4.1	5.18001	162		2.4142	12.9999
82	2012-08-02	2012-08-06	4	4	922	2	66	65	10.27	19.09	10	13.2	0.044	10400000	0.801	0.182	0.175	0.237	3.73333	3.86078	147	9.08147	3.0303	16.0899
83	2012-08-01	2012-08-06	5	10	926	1	71	82	20.86	10.67	16	15.1	0.041	19400000	0.884	0.155	0.136	0.261	6.1	15.7253	128	18.9803	2.99544	14.8714
84	2012-08-02	2012-08-06	4	10	922	1	57	61	18.34	8.79	7	8.1	0.012		0.391	0.118	0.007	0.333	4.1	5.18001	163		2.49307	15.1488
85	2012-08-03	2012-08-06	3	4	920	2	57	61	18.34	8.79	16	20.4	0.05	14600000	1.269	0.387	0.007	0.44	7.3	25.4178	157	5.96821	6.27886	38.1526
86	2012-08-10	2012-08-13	3	2	896	2	68	70	19.96	10.95	9	10.9	0.011	4800000	0.61	0.06	0.05	0.24	4.1	4.93043	145		2.35727	12.1772
87	2012-08-10	2012-08-13	3	2	896	2	66	70	20.38	10.69	10	11.1	0.014	6400000	7	0.16	0.045	0.19	3.86667	4.23159	133	2.05656	2.54821	13.5302
88	2012-08-08	2012-08-13	5	2	903	2	69	66	20.28	11.08	10	12.4	0.016	4600000	0.78	0.17	0.089	0.2	4.06667	4.82653	146		2.60449	13.2749
89	2012-08-08	2012-08-13	5	2	903	1	57	60	18.71	10.34	8	8	0.027		0.483	0.12		0.151	3.46667	3.30647	125	0.0600356	2.4623	14.9618
90	2012-08-07	2012-08-13	6	2	906	2	66	70	19.55	10.89	9	10	0.011	8000000	0.58	0.16	0.056	0.18	2.83333	1.81736	146	0.505066	2.29568	12.1893
91	2012-08-07	2012-08-13	6	2	906	2	68	69	20.44	11.43	9	14.1	0.019	8600000	0.84	0.22	0.201	0.53	4.13333	5.03573	153		3.04931	15.7522
92	2012-08-07	2012-08-14	7	9	906	2	65	66	20.91	11	9	11.5	0.01	5600000	0.611	0.137	0.173	0.265	4.66667	6.92803	159		2.72189	14.6568
93	2012-08-07	2012-08-14	7	2	906	2	67	73	20.61	11.18	11	13.6	0.018	7600000	0.752	0.178	0.229	0.213	3.23333	2.63492	164	11.4935	3.02963	15.8653
94	2012-08-07	2012-08-14	7	2	906	2	78	77	21.88	11.73	16	17.4	0.026	6000000	1.101	0.291	0.41	0.366	4.96667	8.18539	157		2.85996	13.0221
95	2012-08-07	2012-08-14	7	2	906	1	64	59	18.82	10.09	7	9.6	0.018		0.461	0.116	0.096	0.155	4.26667	5.76143	147		2.34375	12.8019
96	2012-09-14	2012-09-20	6	11	765	1	68	68	20.05	10.67	9	12.8	0.083	19800000	0.82	0.16	0.09	0.2	3.76667	4.13218	165		2.76817	14.2999
97	2012-09-18	2012-09-20	2	11	749	1	87	80	22.23	11.65	22	23.996	0.05	23200000	1.595	0.309		0.399	7.03333	24.6198	149	3.02798	3.1703	13.0554
98	2012-09-19	2012-09-20	1	2	745	2	50	52	16.68	9.46	5	5	0.012		0.217	0.072		0.133	2.83333	1.81736	114		2	13.7096
99	2012-09-20	2012-09-23	3	11	741	1	83	82	22.36	11.26	20	23.9	0.043	30000000	1.408	0.306	0.609	0.333	6.76667	21.7146	157	15.9529	3.4693	14.919
100	2012-09-21	2012-09-24	3	8	738	1	80	78	20.82	11.27	18	19.819	0.102	46600000	1.384	0.305	0.1	0.357	6	14.9626	146	3.42184	3.09672	13.7755
101	2012-09-21	2012-09-24	3	8	738	1	53	53	17.19	9.45	9	6.9	0.023	2800000	0.365	0.146		0.161	3.93333	4.63781	67		2.45639	15.9592
102	2012-09-21	2012-09-24	3	8	738	1	76	70	19.27	10.92	15	14.242	0.091	36000000	0.86	0.234	0.026	0.303	5.56667	12.0034	145	1.34848	2.46572	11.4986
103	2012-09-19	2012-09-24	5	2	745	2	60	63	18.13	9.95	7	7.3	0.016	7600000	0.345	0.118	0.024	0.172	3.2	2.56164	150		2.02778	11.7536
104	2012-09-20	2012-09-24	4	11	741	1	63	58	18.75	9.68	5	7.8	0.04	7000000	0.376	0.128	0.005	0.161	3	2.21162	189		1.96523	10.891
105	2012-09-19	2012-09-25	6	2	745	1	68	72	20.07	10.71	12	10.8	0.017	6200000	0.508	0.153	0.042	0.225	4.1	5.18001	153		2.33564	12.0655
106	2012-09-19	2012-09-25	6	11	745	2	78	91	22.7	11.67	18.5	20.9	0.038	33200000	1.081	0.28	0.327	0.384	7.46667	27.3819	144	2.45674	3.43524	15.6415
107	2012-09-19	2012-09-25	6	11	745	2	64	63	18.67	10.31	7	8.5	0.013	8800000	0.447	0.117	0.023	0.184	3.1	2.34763	156		2.0752	11.335
108	2012-09-19	2012-09-25	6	11	745	2	80	82	22.07	11.31	16	19.2	0.036	21400000	1.055	0.267	0.189	0.308	5.46667	10.6502	174	3.75464	3	13.3453
109	2012-09-20	2012-09-25	5	11	741	2	60	62	19.71	10.34	9	8.47	0.014	7000000	0.42	0.122	0.021	0.173	2.8	1.75499	165		2.35278	13.6374
110	2012-09-21	2012-09-27	6	2	738	1	60	71	19.39	10.89	11	10.7	0.04	5800000	0.451	0.195	0.108	0.18	4.2	5.52398	176		2.97222	17.2278
111	2012-09-26	2012-09-27	1	2	718	1	51	56	18.25	9.99	5	5.4	0.006	0	0.199	0.082	0.007	0.165	2.56667	1.36989	137		2.07612	13.9745
112	2012-09-19	2012-09-27	8	2	745	2	70	64	19.6	10.58	12.5	10.6	0.021	9600000	0.479	0.178	0.169	0.197	4.36667	5.81385	179		2.16327	10.881
113	2012-09-25	2012-09-27	2	11	722	2	63	59	19.85	10.25	9	9.5	0.025	11600000	0.545	0.131	0.02	0.218	3.16667	2.48935	149		2.39355	13.2647
114	2012-09-25	2012-09-27	2	11	722	1	64	63	18.82	10.23	8	9.2	0.033	15400000	0.515	0.136	0.028	0.218	3.06667	2.35523	138		2.24609	12.2685
115	2012-09-26	2012-09-27	1	11	718	2	70	71	21.2	11.37	13	15.7	0.023	17000000	0.816	0.207	0.169	0.324	4.63333	6.79748	162	6.17598	3.20408	16.1162
116	2012-09-27	2012-10-01	4	2	714	1	60	62	19.54	10.34	6	9.2	0.01	9200000	0.392	0.125		0.202	3.4	3.13665	106		2.55556	14.8127
117	2012-09-27	2012-10-01	4	2	714	1	57	58	17.9	9.61	6	7	0.011		0.318	0.112	0.006	0.81	3.03333	2.28292	131		2.15451	13.0916
118	2012-09-26	2012-10-02	6	2	718	1	64	62	18.32	10.48	7	8.86	0.003	4400000	0.463	0.125	0.016	0.189	3.56667	3.57026	143		2.16309	11.8151
119	2012-09-26	2012-10-02	6	2	718	1	63	64	19.52	10.6	9	10.32	0.01	3800000	0.615	0.136	0.075	0.201	3.46667	3.30647	146		2.60015	14.4097
120	2012-09-26	2012-10-02	6	2	718	2	58	65	19.57	10.57	8	10.2	0.016		0.494	0.14	0.046	0.207	3.56667	3.42443	133	0.554344	3.0321	18.1317
121	2012-09-26	2012-10-02	6	2	718	2	60	62	18.2	10.29	8	8.4	0.01	6000000	0.44	0.118	0.6	0.203	3.26667	2.70918	131		2.33333	13.5247
122	2012-10-04	2012-10-09	5	8	687	2	68	50	21.58	11.94	16	16.8	0.063	39600000	0.968	0.307	0.094	0.332	5.73333	12.1824	137	3.1816	3.63322	18.7686
123	2012-10-05	2012-10-09	4	8	683	2	72	68	21.57	11.4	15	15.75	0.061	28400000	1.05	0.288	0.098	0.374	4.83333	7.60776	118		3.03819	14.8908
124	2012-10-04	2012-10-09	5	8	687	2	63	58	18.65	10.07	8	10.1	0.077	28000000	0.602	0.157	0.04	0.191	3.96667	4.52307	123	3.24372	2.54472	14.1025
125	2012-10-16	2012-10-18	2	12	641	1	70	78	20.81	11.46	12	14.6	0.016	2800000	0.707	0.229	0.04	0.21	4.2	5.52398	142	6.03284	2.97959	14.987
126	2012-10-16	2012-10-18	2	12	641	2	82	89	23.03	11.77	20	22.7	0.03	12000000	1.208	0.329	0.172	0.296	5.9	13.2271	145	5.73775	3.37597	14.6804
127	2012-10-17	2012-10-18	1	12	637	1	58	76	19.42	10.29	9.5	10.6	0.014	6800000	0.468	0.158	0.023	0.186	4.16667	5.40771	157		3.15101	18.8428
128	2012-10-16	2012-10-18	2	12	641	1	58	71	19.44	10.08	10	9.7	0.006	2800000	0.373	0.091	0.033	0.198	3.6	3.66067	163		2.88347	17.2429
129	2012-10-17	2012-10-22	5	12	637	1	64	82	20.56	10.5	13	16.1	0.025	22400000	0.987	0.256	0.151	0.298	4.03333	4.95857	135	15.1808	3.93066	21.4698
130	2012-10-17	2012-10-22	5	12	637	1	70	81	21.03	10.44	15	17.1	0.038	27600000	0.981	0.292	0.295	0.309	4.13333	5.29306	146	7.92276	3.4898	17.5533
131	2012-10-16	2012-10-22	6	12	641	2	67	80	20.71	10.18	14	17.4	0.034	34000000	1.103	0.282	0.216	0.289	4.46667	6.17038	154	3.90831	3.87614	20.2983
132	2012-10-16	2012-10-22	6	12	641	2	68	74	20.39	9.66	11	14.7	0.025	16600000	0.758	0.191	0.141	0.226	3.96667	4.52307	150	3.32716	3.17907	16.4225
133	2012-10-17	2012-10-23	6	12	637	2	69	77	20.13	10.54	13	16	0.021	15400000	0.828	0.235	0.247	0.262	4.16667	5.14246	156	9.23475	3.36064	17.1289
134	2012-10-17	2012-10-23	6	12	637	2	65	78	21.09	11.38	11	13.7	0.018	13800000	0.688	0.222	0.152	0.228	4.53333	6.41618	164		3.2426	17.4607
135	2012-10-17	2012-10-23	6	12	637	1	84	89	22.11	11.67	18	26.1	0.065	73000000	1.806	0.338	0.674	0.31	5.93333	14.4717	139	11.9877	3.69898	15.7323
136	2012-10-17	2012-10-23	6	12	637	2	80	83	22.01	11.61	16	20.8	0.035	41800000	1.277	0.288	0.564	0.336	4.7	7.06035	169	9.37362	3.25	14.4574
137	2012-10-16	2012-10-23	7	12	641	2	68	80	20.9	10.87	11	16.3	0.019	9400000	0.883	0.234	0.239	0.249	3.56667	3.42443	148	14.5754	3.52509	18.21
138	2012-10-18	2012-10-25	7	12	633	2	77	82	20.45	11.32	11	18	0.019	35600000	1.071	0.288	0.303	0.242	4.46667	6.17038	148	7.8795	3.03593	13.9884
139	2012-10-18	2012-10-25	7	12	633	1	65	73	20.69	11.2	10	13.8	0.012	17800000	0.722	0.207	0.214	0.193	4.06667	5.06851	156	4.01937	3.26627	17.5882
140	2012-10-19	2012-10-25	6	12	633	1	79	85	22.48	11.98	21	23.2	0.047	41000000	1.354	0.349	0.682	0.334	5.3	10.4322	147	9.18865	3.71735	16.7288
141	2012-10-18	2012-10-25	7	12	633	2	85	91	23.22	12.01	27	25.6	0.03	20600000	1.428	0.502	0.487	0.378	8.83333	49.5916	146	4.82687	3.54325	14.9068
142	2012-10-24	2012-10-29	5	12	610	2	73	88	21.81	11.57	17	20.1	0.077	109000000	1.105	0.341	0.265	0.434	6.03333	14.1149	140	1.65904	3.77181	18.2533
143	2012-10-19	2012-10-29	10	12	633	2	73	76	20.86	11.32	12.5	15.7	0.01	16600000	0.809	0.239	0.389	0.208	4.76667	7.33038	164	9.71674	2.94614	14.2576
144	2012-10-19	2012-10-29	10	12	633	2	83	88	22.78	12	21	24.6	0.046	59400000	1.209	0.365	0.948	0.369	6.9	21.2087	147		3.57091	15.3559
145	2012-10-30	2012-11-05	6	10	588	1	60	61	19.13	10.15	7	8.8	0.022	17800000	0.484	0.124	0.017	0.178	3.03333	2.28292	115		2.44444	14.1687
146	2012-10-31	2012-11-05	5	1	585	2	75	78	21.01	10.95	14.5	16	0.075	78600000	1.454	0.32	0.202	0.374	6.06667	14.3444	134	0.831039	2.84444	13.4273
147	2012-10-30	2012-11-05	6	10	588	1	71	72	20.27	10.03	14	14.4	0.018	33300000	0.789	0.174	0.187	0.301	5.26667	10.2478	156	0.618475	2.85658	14.182
148	2012-10-30	2012-11-05	6	10	588	2	72	80	20.91	10.38	16	16.3	0.033	50200000	1.061	0.287	0.186	0.294	5.43333	10.4699	141		3.14429	15.4108
149	2012-10-30	2012-11-05	6	1	588	2	78	80	20.98	10.28	14	16.8	0.026	27600000	0.972	0.245	0.253	0.257	5.73333	12.1824	173	3.20226	2.76134	12.5731
150	2012-11-06	2012-11-08	2	13	563	2	72	71	20	10.29	13	13.8	0.016	28600000	0.614	0.214	0.136	0.21	4.63333	6.79748	157		2.66204	13.0472
151	2012-11-02	2012-11-08	6	10	577	2	64	60	18.4	9.8	9	11.6	0.015	15600000	0.662	0.168	0.165	0.178	3.73333	3.86078	160		2.83203	15.469
154	2012-11-01	2012-11-08	7	10	581	2	71	76	21.17	11.74	15	15.8	0.025	58800000	0.909	0.246	0.143	0.288	5.16667	9.11215	156		3.1343	15.5608
155	2012-11-07	2012-11-13	6	13	560	2	73	75	21.8	10.93	13	14.8	0.026	60600000	0.809	0.231	0.252	0.257	4.8	7.46814	136		2.77726	13.4403
156	2012-11-07	2012-11-13	6	13	560	1	72	71	19.17	10.66	9	11.3	0.012	22000000	0.5	0.156	0.13	0.174			143	2.34306	2.17978	10.6836
157	2012-11-07	2012-11-13	6	13	560	2	71	75	20.42	11.27	10	13.4	0.02	28000000	0.767	0.181	0.245	0.182	2.56667	1.34111	147		2.6582	13.1971
158	2012-11-08	2012-11-15	7	13	556	2	69	71	20.62	10.89	12	13.3	0.016	29800000	0.647	0.208	0.126	0.199	4.3	5.58401	153		2.79353	14.2384
159	2012-11-07	2012-11-15	8	13	560	2	80	90	23.95	11.92	17	20.4	0.019	26000000	0.912	0.332	0.44	0.315	6.86667	20.8877	156	3.49609	3.1875	14.1793
160	2012-11-13	2012-11-15	2	2	540	1	58	60	17.56	9.4	6	6.7	0.002	21600000	0.301	0.117		0.158	2.7	1.6128	155		1.99168	11.91
161	2012-11-13	2012-11-15	2	2	540	2	57	61	17.99	10.09	6	6.4	0.01	6800000	0.28	0.088	0.013	0.155	2.76667	1.69346	152		1.96984	11.9694
162	2012-11-13	2012-11-19	6	2	540	2	66	67	19.88	9.98	11	12.14	0.015	13600000	0.618	0.166	0.107	0.222	4.03333	4.72401	146	1.71078	2.78696	14.7979
163	2012-11-13	2012-11-19	6	2	540	2	68	70	20.2	10.05	11.5	11.5	0.024	12800000	0.647	0.152	0.074	0.204	3.76667	3.95163	140			12.8475
164	2012-11-08	2012-11-19	11	13	556	1	69	75	19.39	9.79	10	12.6			0.69	0.161	0.064	0.208	2.2	0.767807	136		2.6465	13.489
165	2012-11-13	2012-11-19	6	2	540	1	63	68	19.74	10.64	10	13.4	0.011	15400000	0.708	0.157	0.063	0.244	3.9	4.53384	148		3.37617	18.7102
166	2012-11-15	2012-11-19	4	2	533	1	72	77	10.38	19.82	21	15.3	0.018	40000000	0.96	0.189	0.018	0.274	5.4	11.0009	117		2.95139	14.4654
167	2012-11-15	2012-11-20	5	2	533	1	67	68	19.33	9.87	15	11.9	0.015	27200000	0.555	0.137	0.261	0.219	4.5	6.64676	160		2.65092	13.8822
168	2012-11-14	2012-11-20	6	2	537	2	67	77	20.44	10.58	13	14.1	0.01	22000000	0.762	0.167	0.262	0.273	4.23333	5.36027	147		3.14101	16.4486
169	2012-11-14	2012-11-20	6	2	537	1	78	77	20.14	10.33	15	18.4		23800000	0.966	0.226	0.529	0.27	5.26667	10.2478	134	14.9525	3.02433	13.7705
170	2012-11-13	2012-11-20	7	2	540	2	60	70	19.94	10.49	9	12.3	0.018	20600000	0.677	0.151	0.131	0.236	4.2	5.25064	142		3.41667	19.804
171	2012-11-13	2012-11-20	7	2	540	2	72	69	19.17	10.27	11	14.6	0.031	37600000	0.848	0.201	0.246	0.239			148	3.60306	2.81636	13.8035
172	2012-11-16	2012-11-26	10	2	530	1	73	70	19.47	10.29	12	13.3		12200000	0.618	0.143	0.327	0.203	4.73333	7.62303	152		2.49578	12.0781
173	2012-11-15	2012-11-26	11	2	533	2	72	70	19.57	10.58	11	12.5		9400000	0.631	0.162	0.227	0.223	4.63333	6.79748	141	2.8568	2.41127	11.8181
174	2012-11-16	2012-11-26	10	2	530	1	57	60	18.85	9.84	7	9.2	0.007	20000000	0.638	0.156	0.039	0.203	3.7	3.93962	120		2.83164	17.2061
175	2012-11-15	2012-11-26	11	2	533	2	60	66	17.91	9.83	6	10.2	0.004	9200000	0.594	0.121	0.123	0.163	4.3	5.58401	136		2.83333	16.4228
176	2012-11-15	2012-11-26	11	2	533	1	70	77	19.28	10.45	12	13.7	0.01		0.62	0.157	0.234	0.216	5.23333	10.066	155	9.8428	2.79592	14.0632
177	2012-11-22	2012-11-27	5	2	513	2	69	70	19.57	10.11	12	14.2	0.035	43400000	1.014	0.2	0.059	0.289	4.43333	6.04994	144	1.72812	2.98257	15.2019
178	2012-11-20	2012-11-27	7	2	519	2	68	75	20.5	10.62	11	15.6	0.02	25000000	0.878	0.187	0.356	0.24	4.66667	6.92803	146	10.0491	3.3737	17.428
179	2012-11-20	2012-11-27	7	2	519	2	60	68	19.25	9.84	7	11.6	0.038	5400000	0.649	0.14	0.098	0.219	4.13333	5.03573	99		3.22222	18.6769
180	2012-11-20	2012-11-27	7	2	519	1	55	60	17.65	9.69	5	9.2	0.008	15700000	0.447	0.152	0.035	0.2	3.5	3.39317	143		3.04132	19.0975
181	2012-11-22	2012-11-29	7	10	513	2	67	75	20.44	10.05	12	12.7	0.024	47400000	0.692	0.196	0.122	0.197	5.16667	9.11215	157		2.82914	14.8154
182	2012-11-22	2012-11-29	7	2	513	1	61	63	17.26	9.97	7	10.4	0.014	28000000	0.494	0.161	0.078	0.162	3.46667	3.30647	139	0.470189	2.79495	15.9558
183	2012-11-21	2012-11-29	8	10	516	2	73	80	21.44	10.84	17	19.6	0.029	37400000	1.038	0.318	0.323	0.36	5.23333	9.43805	158	2.64964	3.67799	17.7993
184	2012-12-04	2012-12-06	2	11	487	1	65	70	19.53	9.75	11	11.3	0.021	19400000	0.566	0.171		0.233	4.3	5.88267	171		2.67456	14.4019
185	2012-12-04	2012-12-06	2	11	487	1	57	62	17.43	8.98	7	8.9	0.007	6800000	0.484	0.131		0.169	3.06667	2.35523	173		2.7393	16.645
186	2012-12-04	2012-12-06	2	11	487	1	78	75	21.39	10.69	16	17.5	0.021	14200000	1.08	0.238	0.017	0.308	5.5	11.594	151		2.8764	13.097
187	2012-12-03	2012-12-06	3	9	488	1	70	75	19.41	10.55	14	15.4	0.018	24600000	0.861	0.26	0.078	0.31	4.26667	5.76143	137		3.14286	15.8082
188	2012-11-30	2012-12-06	6	9	494	2	73	73	20.79	10.87	16	19.1	0.032	32400000	1.228	0.301	0.266	0.349	4.43333	6.04994	173	0.470189	3.58416	17.3452
189	2012-12-05	2012-12-10	5	9	485	2	70	82	20.83	11.03	16	18.9	0.022	53800000	1.14	0.282	0.336	0.331	4.3	5.58401	160	4.24472	3.85714	19.401
190	2012-12-06	2012-12-10	4	9	483	2	71	72	21.69	10.53	16	17.5	0.039	51800000	1.101	0.256	0.126	0.417	4.66667	6.92803	144		3.47153	17.235
191	2012-12-05	2012-12-10	5	11	485	1	68	69	19.61	9.65	11	12.4	0.018	29800000	0.634	0.144	0.07	0.218	4.43333	6.38491	160		2.68166	13.853
192	2012-12-05	2012-12-10	5	9	485	1	72	80	21.29	10.71	14	17.1	0.034	69200000	0.847	0.222	0.306	0.322	4.3	5.88267	158		3.29861	16.1672
193	2012-12-07	2012-12-11	4	11	481	2	55	63			7	9.6	0.023	25200000	0.573	0.13	0.034	0.208	3.2	2.56164	152		3.17355	19.9279
194	2012-12-07	2012-12-11	4	12	481	2	77	81	21.47	10.39	20	23.7	0.053	86200000	1.283	0.352	0.406	0.418	5.43333	10.4699	141	4.75559	3.9973	18.4181
195	2012-12-07	2012-12-11	4	11	481	2	72	72	20.55	10.46	14	16.7	0.051	26200000	0.919	0.218	0.14	0.28	5.33333	9.9436	141	2.21676	3.22145	15.789
196	2012-12-06	2012-12-11	5	11	483	1	68	71	19.46	10.52	11	13.8	0.018	25200000	0.655	0.159	0.077	0.269	4.73333	7.62303	165		2.98443	15.4171
197	2013-01-07	2013-01-14	7	7	485	1	72	74	19.46	10.24	13	14.9	0.047	57600000	0.702	0.186	0.332	0.297	6.13333	15.9867	115		2.87423	14.0872
198	2013-01-08	2013-01-14	6	2	486	2	68	65	18.73	10.23	10	12.1	0.011	20200000	0.763	0.141	0.118	0.22	4.36667	5.81385	138		2.61678	13.5179
199	2013-01-08	2013-01-14	6	2	486	2	70	73	19.54	10.54	13	15.2	0.024	48400000	0.741	0.193	0.297	0.254	2.5	1.22983	137	6.55613	3.10204	15.6029
200	2013-01-08	2013-01-14	6	2	486	2	73	76	10.56	21.51	18	19.3	0.064	86200000	1.479	0.306	0.376	0.306	5.36667	10.1167	148	1.53244	3.62169	17.5268
201	2013-01-08	2013-01-14	6	2	486	1	73	74	21.44	10.72	12	14.5	0.027	31600000	0.683	0.199	0.329	0.252	4.96667	8.6996	149	0.676961	2.72096	13.1678
202	2013-01-09	2013-01-15	6	2	488	1	69	74	20.55	10.99	11	12.5	0.027	7200000	0.691	0.143	0.176	0.208	5.13333	9.53563	154	1.18822	2.6255	13.3819
203	2013-01-11	2013-01-15	4	7	492	1	89	81	23.12	11.85	21	20.1	0.086	110600000	1.351	0.256	0.265	0.407	6.56667	19.7391	121		2.53756	10.2335
204	2013-01-10	2013-01-15	5	2	490	2	65	67	19.86	10.77	10	10.6	0.021		0.598	0.144	0.061	0.218	3.63333	3.59547	108		2.50888	13.5098
205	2013-01-10	2013-01-15	5	7	490	2	80	81	22.92	12.27	22	23.5	0.059	111800000	1.238	0.373	0.301	0.479	6.53333	17.9032	142	3.11377	3.67188	16.334
206	2013-01-10	2013-01-15	5	7	490	1	73	73	21.75	11.31	15	17	0.06	111400000	1.036	0.242	0.184	0.332	5.63333	12.4245	154	4.3645	3.19009	15.4381
207	2013-01-08	2013-01-16	8	7	486	2	74	81	21.88	11.93	14	18.8	0.097	97800000	1.047	0.284	0.42	0.261	6.36667	16.5548	121	3.16757	3.43316	16.4078
208	2013-01-09	2013-01-16	7	2	488	2	75	74	20.9	11.05	14	14.1	0.031	43400000	0.776	0.198	0.27	0.225	4.43333	6.04994	150	5.02319	2.50667	11.8328
209	2013-01-10	2013-01-16	6	2	490	1	73	76	21.12	11.3	12	16.6	0.036	42400000	0.837	0.21	0.392	0.306	5.23333	10.066	159		3.11503	15.0749
210	2013-01-09	2013-01-16	7	7	488	2	80	78	23.22	12.23	21	26	0.073	88400000	1.454	0.384	0.497	0.392	6.6	18.4685	139	9.01546	4.0625	18.0717
211	2013-01-11	2013-01-16	5	7	492	1	68	68	20	10.72	11	12	0.034	58600000	0.585	0.178	0.079	0.189	5.3	10.4322	143		2.59516	13.4061
212	2013-01-11	2013-01-28	17	7	492	1	74	73	20.26	10.81	9	15.4	0.037	38600000	0.866	0.18	0.396	0.301	5.53333	11.7973	127	15.8202	2.81227	13.4404
213	2013-01-09	2013-01-28	19	2	488	2	74	73	20.29	11.51	11	15	0.028	15000000	0.618	0.202	0.64	0.283	5.93333	13.4446	167		2.73923	13.0913
214	2013-01-09	2013-01-28	19	2	488	2	71	74	21.45	11.07	13	14.8	0.011	15800000	0.586	0.198	0.557	0.319	5.43333	10.4699	142		2.93593	14.5759
215	2013-01-09	2013-01-28	19	7	488	2	68	65	20.96	11.24	14	16.9	0.061	146600000	0.895	0.259	0.353	0.297	5.06667	8.63944	144	2.51687	3.65484	18.8803
216	2013-01-08	2013-01-28	20	7	486	1	70	67	20.79	11.16	6	14.3	0.036	21600000	0.854	0.189	0.297	0.311	3.96667	4.74324	126	2.15364	2.91837	14.6791
217	2013-01-30	2013-01-31	1	11	544	1	56	58	18.51	10.33	6	7.2	0.019	5600000	0.294	0.116		0.188	2	0.476369	0		2.29592	14.1799
218	2013-01-30	2013-01-31	1	11	544	1	70	65	20.76	11.32	11	12.2	0.025	6800000	0.471	0.157	0.009	0.216	5.2	9.88675	140		2.4898	12.5234
219	2013-01-30	2013-01-31	1	11	544	2	79	76	21.12	10.85	13	14.5	0.028	63000000	0.606	0.19	0.021	0.279	5.16667	9.11215	178		2.32335	10.4555
220	2013-01-29	2013-01-31	2	11	540	1	54	59	18.33	9.67	7	7.4	0.012	8400000	0.262	0.115		0.157	2.7	1.6128	146		2.53772	16.2065
221	2013-01-29	2013-01-31	2	11	540	1	75	74	21.33	10.79	13	16	0.029	32200000	0.802	0.184	0.025	0.287	6.2	16.5205	138	2.02176	2.84444	13.4273
222	2013-02-01	2013-02-05	4	7	550	1	71	77	18.51	10.2	12	13.1	0.04	37600000	0.574	0.161	0.161	0.243	6.3	17.3499	127	3.29929	2.59869	12.9017
223	2013-02-01	2013-02-05	4	7	550	2	78	80	21.12	10.62	15	17.4	0.158	219000000	1.108	0.271	0.189	0.305	6.6	18.4685	122		2.85996	13.0221
224	2013-02-01	2013-02-05	4	7	550	1	77	63	19.64	9.73	12	13.3	0.046	79400000	0.8	0.176	0.052	0.303	4.46667	6.51492	168	0.289436	2.24321	10.3359
225	2013-01-31	2013-02-05	5	11	547	2	78	80	21.37	11.13	16	23	0.057	100400000	1.182	0.27	0.249	0.387	6.46667	17.353	168	2.0632	3.78041	17.2131
226	2013-01-31	2013-02-05	5	7	547	2	80	79	20.35	11	19	21.6	0.047	30600000	1.065	0.312	0.275	0.489	6.43333	17.0833	136	8.85181	3.375	15.0134
227	2013-02-08	2013-02-11	3	7	574	1	70	77	18.58	10.69	11	13.2	0.038	74800000	0.7	0.196	0.169	0.228	6	14.9626	86	4.95245	2.69388	13.5499
228	2013-02-07	2013-02-11	4	7	570	2	74	66	21.4	11.08	13	15.2	0.037	46800000	0.833	0.225	0.108	0.272	4.96667	8.18539	122	3.35397	2.77575	13.2659
229	2013-02-07	2013-02-11	4	7	570	1	70	61	20.93	11	12	13.3	0.094	187000000	0.8	0.183	0.061	0.263	4.2	5.52398	146		2.71429	13.6526
230	2013-02-05	2013-02-11	6	12	564	1	63	71	19.68	10.67	8	9.9	0.016	9200000	0.496	0.167	0.048	0.202	3.66667	3.84533	123		2.49433	13.8232
231	2013-02-12	2013-02-18	6	10	589	1	73	74	22.48	11.12	19	16.448	0.05		1.121	0.195	0.267	0.316	5.86667	13.9942	161	7.2995	3.08651	14.9368
232	2013-02-14	2013-02-18	4	10	596	2	65	82	23.09	12.77	19	22.1	0.061	58800000	1.365	0.37	0.254	0.435	7.53333	28.2053	138	11.453	5.23077	28.1666
233	2013-02-26	2013-02-27	1	2	642	1	70	77	21.81	11.11	14	14.129	0.024	22800000	0.792	0.192	0.038	0.257	5.4	11.0009	159	0.284001	2.88347	14.5035
234	2013-02-26	2013-02-27	1	2	642	2	69	70	20.65	11.02	13	13.3	0.015	34600000	0.619	0.169	0.018	0.282	4.43333	6.04994	74		2.79353	14.2384
235	2013-02-26	2013-02-27	1	2	642	2	72	83	22.53	11.9	20	19.7	0.034	54600000	1.165	0.32	0.064	0.31	6.86667	20.8877	158		3.80015	18.6253
236	2013-02-26	2013-02-27	1	2	642	2	54	60	18.44	10.17	7	7.3	0.004		0.367	0.131	0	0.209	3.06667	2.27819	95		2.50343	15.9875
237	2013-01-26	2013-02-27	32	2	642	1	80	84	22.74	11.98	19	21.8	0.084	78200000	2.678	0.347	0.081	0.402	5.96667	14.7154	154	0.499807	3.40625	15.1524
238	2013-02-26	2013-02-27	1	2	642	2	70	74	21.72	11.88	17	17.4	0.026	37400000	0.721	0.235	0.081	0.273	6	13.8885	143	0.171057	3.55102	17.8612
239	2013-02-27	2013-03-04	5	2	646	2	74	71	22.17	11.24	14	16.5	0.012	11400000	0.987	0.222	0.317	0.281	5.9	13.2271	150	1.85108	3.01315	14.4004
240	2013-02-27	2013-03-04	5	2	646	2	72	71	21.49	11.9	14	18.2	0.024	32800000	1.1	0.209	0.284	0.317	5.5	10.8328	152	4.11272	3.5108	17.2072
241	2013-02-27	2013-03-04	5	2	646	2	73	78	22.16	11.71	17	19.4	0.036	34600000	1.12	0.266	0.264	0.272	6.26667	15.7881	156	2.51687	3.64046	17.6176
242	2013-02-27	2013-03-04	5	2	646	2	75	71	22.42	11.95	18	18.4	0.036	36600000	0.996	0.276	0.257	0.342	5.5	10.8328	151	1.18198	3.27111	15.4414
243	2013-02-27	2013-03-04	5	2	646	1	67	75	21.06	10.36	12	14.4	0.023	35400000	0.937	0.186	0.292	0.293	3.43333	3.22097	144		3.20784	16.7986
244	2013-03-01	2013-03-05	4	2	654	2	74	80	22.79	11.89	17	18	0.019	33800000	0.939	0.238	0.178	0.275	5.66667	11.7838	159		3.28707	15.7096
245	2013-03-01	2013-03-05	4	2	654	1	72	80	21.48	10.95	19	15.5	0.034	32800000	1.039	0.189	0.1	0.265	5.76667	13.3026	140		2.98997	14.6544
246	2013-02-28	2013-03-05	5	2	651	2	71	73	21.41	10.9	10	13	0.084	84400000	0.863	0.195	0.139	0.289	5.16667	9.11215	124		2.57885	12.8032
247	2013-02-28	2013-03-05	5	2	651	1	69	71	20.07	10.84	12	15.4	0.037	9600000	0.781	0.17	0.102	0.231	4.43333	6.38491	158		3.23461	16.4866
248	2013-02-27	2013-03-05	6	2	646	1	66	75	20.75	11.43	11	13.3	0.03	52200000	0.755	0.175	0.255	0.24	4.5	6.64676	138		3.05326	16.2118
249	2013-03-01	2013-03-07	6	1	654	1	63	70	20.53	11.29	9	11.9	0.022	6200000	0.611	0.18	0.143	0.216	4.73333	7.62303	145		2.99824	16.6158
250	2013-03-01	2013-03-07	6	1	654	1	64	73	20.64	11.28	12	13.813	0.03	20600000	0.996	0.211	0.06	0.206	5.23333	10.066	47		3.37231	18.4201
251	2013-03-01	2013-03-07	6	1	654	2	58	63	19.5	10.62	9	7.1	0.01	2800000	0.243	0.142	0	0.164	4.1	4.93043	179		2.11058	12.6211
252	2013-03-08	2013-03-14	6	1	681	2	70	79	21.78	11.36	14	15.26	0.033	32600000	0.65	0.221	0.132	0.236	5.6	11.3957	144		3.11429	15.6645
253	2013-03-12	2013-03-14	2	1	697	1	80	76	21.56	11.88	16	17	0.062	28200000	0.865	0.237	0.071	0.254	8.2	41.9453	144		2.65625	11.8161
254	2013-03-07	2013-03-14	7	1	678	2	64	77	21.12	11.02	11	12.55	0.032		0.71	0.193	0.122	0.186	5.56667	11.2056	133		3.06396	16.7358
255	2013-03-07	2013-03-18	11	1	678	2	68	68	20.72	10.9	12	12.8	0.009	17200000	0.574	0.178	0.215	0.206	4.63333	6.79748	161		2.76817	14.2999
256	2013-03-07	2013-03-18	11	1	678	2	61	78	20.69	10.98	11	13.4	0.093	65400000	0.609	0.18	0.318	0.245	5.56667	11.2056	145		3.60118	20.5584
257	2013-03-22	2013-03-26	4	4	737	1	71	69	21.21	11	13	15.3	0.038	66800000	1.043	0.196	0.114	0.322	5.1	9.36372	109		3.03511	15.0683
258	2013-03-22	2013-03-26	4	4	737	1	73	79	21.38	11.29	14	14.568	0.034	47000000	0.952	0.196	0.12	0.311	5.7	12.8574	145		2.73372	13.2296
259	2013-03-21	2013-03-26	5	4	732	1	60	62	19.2	10.01	9	9.7	0.02	21400000	0.565	0.136	0.048	0.2	3.3	2.89066	147		2.69444	15.6178
260	2013-03-21	2013-03-26	5	4	732	2	61	64	19.5	10.6	9	11	0.019	66200000	0.675	0.141	0.078	0.233	3.3	2.78445	118		2.95619	16.8763
261	2013-04-15	2013-04-16	1	3	831	1	91	76	10.9	21.38	19.1	19.1	0.078	43200000	1.54	0.22	0.195	0.42	6.6	20.0569	117	17.5977	2.30648	9.11341
262	2013-04-15	2013-04-16	1	3	831	2	89	87	21.37	11.65	20.37	20.37	0.057	16800000	1.12	0.46	0.203	0.3	7.16667	23.9388	177		2.57164	10.371
263	2013-04-15	2013-04-16	1	3	831	2	68	66	19.41	9.28	7.17	7.17	0.01	2000000	0.343	0.084	0.01	0.129	3.83333	4.13701	154		1.55061	8.01017
264	2013-04-15	2013-04-16	1	3	831	2	67	67	18.53	8.86	7.8	7.8	0.012	4000000	0.375	0.098	0.029	0.141	3.76667	3.95163			1.73758	9.09923
265	2013-04-16	2013-04-16	0	3	834	2	91	84	22.06	11	19.1	19.1	0.02	40000000	0.97	0.26	0.163	0.28	7.6	29.051	136	10.0043	2.30648	9.11341
266	2013-04-16	2013-04-16	0	3	834	2	62	62	18.36	9.48	6.7	6.7	0.004	2800000	0.297	0.082	0.007	0.143	3.66667	3.68272	168		1.74298	9.80256
267	2013-04-16	2013-04-16	0	3	834	2	83	73	21.57	10.82	16.5	16.5	0.116	140000000	1.05	0.23	0.226	0.3	6.2	15.2939	132	12.4822	2.39512	10.2997
268	2013-04-16	2013-04-16	0	3	834	2	63	66	18.28	9.74	6.4	6.4	0.024	4000000	0.265	0.071	0	0.115	3.6	3.50937			1.6125	8.93622
269	2013-04-16	2013-04-16	0	3	834	2	65	62	18.7	9.23	8	8	0.01	8200000	0.41	0.11	0.069	0.19	3.33333	2.86074		35.9848	1.89349	10.196
270	2013-04-17	2013-04-18	1	3	838	2	55	68	19	9.9	6.9	6.9	0.013		0.296	0.1	0.014	0.13	4.03333	4.72401	161		2.28099	14.3231
271	2013-04-18	2013-04-19	1	3	843	1	75	46	23.89	10.9	17.7	17.565	0.066	24000000	1.18	0.22	0.246	0.31	6.86667	22.7662	141	9.35766	3.12267	14.7407
272	2013-04-18	2013-04-18	0	3	843	2	85	79	22.59	11.49	19.1	19.1	0.025	14400000	1.18	0.3	0.102	0.295	7.06667	22.8805	107	3.84937	2.6436	11.1219
273	2013-04-18	2013-04-18	0	3	843	1	81	85	21.35	10.69	17.8	17.088	0.09	484000	1.2	0.21	0.228	0.22	5.96667	14.7154	129	20.7806	2.60448	11.4542
274	2013-04-19	2013-04-19	0	3	846	1	81	79	20.95	10.5	15.4	15.4	0.08		0.91	0.18	0.291	0.22	6	14.9626	160	30.2437	2.3472	10.3227
275	2013-04-23	2013-04-29	6	2	861	2	71	68	20.42	10.65	11	13.4	0.021	12600000	0.72	0.165	0.195	0.221	4.4	5.9311	143		2.6582	13.1971
276	2013-04-26	2013-04-29	3	2	872	1	68	71	20.75	10.99	12	13	0.2	16000000	0.696	0.171	0.158	0.185	4.73333	7.62303	157	12.133	2.81142	14.5233
277	2013-04-23	2013-04-29	6	2	861	2	75	76	21.15	10.29	15	17.4	0.037	26000000	0.908	0.236	0.462	0.233	5.13333	8.95246	140	22.0825	3.09333	14.6022
278	2013-04-23	2013-04-29	6	2	861	2	74	75	21.68	10.91	15	17.3	0.03	27800000	0.889	0.201	0.372	0.281	5.1	8.7949	139	31.081	3.15924	15.0986
279	2013-04-25	2013-04-29	4	2	868	1	70	74	22.21	11.2	16	17.7	0.027	15000000	1.098	0.224	0.314	0.278	6.63333	20.3792	128	23.6934	3.61224	18.1692
280	2013-04-24	2013-04-30	6	2	865	2	73	81	22.65	11.54	16	20.1	0.056	68800000	0.991	0.289	0.426	0.296	5.46667	10.6502	144	22.8447	3.77181	18.2533
281	2013-04-24	2013-04-30	6	2	865	2	69	74	20.15	11.13	14	15.7	0.035		0.788	0.188	0.312	0.263	4.83333	7.60776	163	15.4623	3.29763	16.8077
282	2013-04-23	2013-04-30	7	2	861	2	72	77	20.91	11.27	13	15.2	0.023	22000000	0.695	0.193	0.303	0.225	4.93333	8.03806	153	21.473	2.9321	14.3708
283	2013-04-23	2013-04-30	7	2	861	2	73	77	21.92	11.76	17	20.4	0.038	52800000	1.123	0.25	0.41	0.263	5.5	10.8328	149	31.5323	3.82811	18.5258
284	2013-04-22	2013-04-30	8	2	857	2	76	80	21.96		14	16.3	0.048	20400000	0.757	0.207	0.273	0.264	5.16667	9.11215	151		2.82202	13.1601
285	2013-04-23	2013-05-02	9	2	861	1	63	63	19.94	9.6	6	10.4	0.015	14600000	0.489	0.148	0.132	0.157	4.7	7.47765	136		2.62031	14.5214
286	2013-04-25	2013-05-02	7	2	868	2	65	68	19.51	10.62	9	11.9	0.096	51800000	0.576	0.169	0.049	0.25	4.23333	5.36027	91	9.60132	2.81657	15.1666
287	2013-04-26	2013-05-02	6	2	872	2	72	69	20.78	10.68	11	12.4	0.027	27800000	0.745	0.178	0.106	0.185	4.56667	6.54158	151		2.39198	11.7236
288	2013-04-25	2013-05-02	7	2	868	2	84	88	21.93	10.94	15	18.5	0.051	53200000	0.894	0.283	0.507	0.244	4.6	6.66867	138	26.438	2.62188	11.1513
289	2013-04-24	2013-05-02	8	2	865	1	56	59	19.23	10.46	7	10.9	0.018		0.359	0.134		0.114	4.1	5.18001	92	2.22731	3.47577	21.4667
290	2013-05-02	2013-05-07	5	4	894	1	83	74	21.1	12.01	21	20.12	0.028		1.36	0.278	0.396	0.368	6.93333	23.4921	138	29.3087	2.9206	12.5594
291	2013-05-02	2013-05-07	5	4	894	1	51	60	18.93	10.02	7	8.6	0.011	3400000	0.487	0.117		0.151	3.93333	4.63781	113		3.30642	22.2557
292	2013-05-02	2013-05-07	5	4	894	1	58	58	18.71	10.22	8	11.4	0.03	49800000	0.731	0.139	0.126	0.175	3.8	4.2305	80		3.38882	20.2649
293	2013-05-01	2013-05-07	6	1	890	1	62	72	20.14	10.98	11	13.5	0.026	23000000	0.697	0.164	0.256	0.249	5.43333	11.1958	142		3.51197	19.7514
294	2013-05-02	2013-05-07	5	4	894	1	72	79	22.21	11.95	22.5	21.2	0.036	43000000	1.25	0.26	0.6	0.361	6.36667	17.9224	132	35.8336	4.08951	20.0435
295	2013-05-09	2013-05-20	11	12	917	2	83	90	22.36	11.71	21	24.4	0.051	42800000	1.076	0.393	0.749	0.375	7.56667	28.6253	153	26.7235	3.54188	15.2311
296	2013-05-08	2013-05-20	12	12	915	2	90	100	22.9	12.2	22	29	0.027	13600000	1.094	0.383	1.366	0.378	8.03333	35.1386	119	42.6602	3.58025	14.2909
297	2013-05-08	2013-05-20	12	12	915	2	84	91	21.45	11.23	17	18.4	0.057	61200000	0.715	0.304	0.622	0.266	6.5	17.6263	159	17.4091	2.60771	11.091
298	2013-05-08	2013-05-20	12	12	915	2	90	91	23.13	12.15	22	28	0.046	11000000	1.325	0.435	1.12	0.421	7.63333	29.4825	132	25.6163	3.45679	13.7981
299	2013-05-08	2013-05-20	12	12	915	1	85	94	23.19	11.9	28	22.3	0.043	21000000	1.054	0.325	0.85	0.362	8.3	43.8628	130	24.0373	3.08651	12.9852
300	2013-05-15	2013-05-21	6	12	936	1	78	85	21.76	12.04	19	22.755	0.09	11300000	1.419	0.315	1.115	0.353	6.86667	22.7662	129	34.6059	3.74014	17.0298
301	2013-05-15	2013-05-21	6	12	936	2	76	87	21.6	12.23	16	20.7	0.07	71000000	1.008	0.293	0.432	0.276	6.03333	14.1149	149	24.4086	3.5838	16.7126
302	2013-05-16	2013-05-21	5	12	939	2	89	92	24.05	12.43	21	25.1	0.044	33200000	1.236	0.43	0.646	0.33	7	22.1983	137	22.3193	3.16879	12.7792
303	2013-05-10	2013-05-12	2	4	921	1	68	61	18.61	10.64	10	11.7	0.017	10000000	0.655	0.145	0.222	0.197	4.03333	4.95857	146		2.53028	13.071
304	2013-05-14	2013-05-21	7	12	933	2	85	95	22.95	12.62	24	28.7	0.087	78000000	1.58	0.412	0.851	0.362	6.83333	20.5709	146	19.9202	3.97232	16.7119
305	2013-06-04	2013-06-05	1	2	983	2	64	65	19.1	10.06	8	6.5	0.01		0.222	0.096	0	0.154	4.16667	5.14246	200		1.58691	8.66795
306	2013-06-04	2013-06-05	1	2	983	2	52	54	18.11	9.72	5	4.7	0.007		0.166	0.068	0	0.103	2.86667	1.88057	162		1.73817	11.4926
307	2013-06-04	2013-06-05	1	2	983	2	76	79	21.13	11.43	14	15	0.026	10200000	0.666	0.184	0.049	0.163	5.3	9.77282	154	4.64514	2.59695	12.1106
308	2013-05-29	2013-06-05	7	2	972	2	68	75	20.95	10.97	11	13.8	0.027	21200000	0.827	0.2	0.193	0.191	4.7	7.06035	135	29.8844	2.98443	15.4171
309	2013-05-29	2013-06-05	7	2	972	1	76	78	21.64	11.65	18	18.447	0.036	25400000	0.954	0.222	0.432	0.263	5.86667	13.9942	147	30.2437	3.19373	14.8936
310	2013-06-19	2013-06-24	5	11	997	1	68	66	19.76	10.87	9	12.6	0.04	42800000	0.704	0.148	0.157	0.23	3.76667	4.13218	167		2.72491	14.0764
311	2013-06-18	2013-06-24	6	11	997	1	84	80	22.55	12.32	18	23	0.058	27000000	1.393	0.237	0.604	0.31	6.8	22.0602	160		3.25964	13.8638
312	2013-06-18	2013-06-24	6	11	997	2	58	66	19.53	10.57	8	11.5	0.028	26200000	0.592	0.146	0.114	0.177	3.6	3.50937	164		3.41855	20.4426
313	2013-06-18	2013-06-24	6	11	997	2	70	73	20.55	10.7	10	13	0.03	11400000	0.652	0.16	0.096	0.244	3.46667	3.17635	171		2.65306	13.3446
314	2013-06-07	2013-06-24	17	2	987	2	62	65	19.77	10.73	6	11.5	0.014	10800000	0.5	0.134	0.0339	0.191	4.16667	5.14246	134		2.99168	16.8253
315	2013-06-25	2013-07-01	6	12	997	2	61	68	20.05	10.73	6	11.4	0.033	26600000	0.611	0.159	0.082	0.171	3.53333	3.34062	123	10.1459	3.06369	17.49
316	2013-06-25	2013-07-01	6	12	997	2	70	80	21.24	11.47	11	15.8	0.057	56600000	0.877	0.248	0.287	0.232	4.66667	6.92803	142	19.2321	3.22449	16.2188
317	2013-06-25	2013-07-01	6	12	997	2	75	78	21.82	11.76	14	16.7	0.032	20200000	0.83	0.207	0.482	0.232	4.43333	6.04994	172		2.96889	14.0148
318	2013-06-25	2013-07-01	6	12	997	2	70	82	20.89	11.36	14	17.3	0.041	37400000	0.925	0.226	0.341	0.246	4.96667	8.18539	147	32.0726	3.53061	17.7586
319	2013-06-25	2013-07-01	6	12	997	1	68	73	20	10.88	8	12.2	0.041	21200000	0.659	0.191	0.133	0.196	3	2.21162	143		2.63841	13.6296
320	2013-06-26	2013-07-02	6	12	996	2	86	89	22.62	11.72	20	23.1	0.042	58600000	1.286	0.355	0.671	0.326	7.06667	22.8805	135	25.3876	3.12331	12.9995
321	2013-06-26	2013-07-02	6	12	996	1	69	77	19.76	10.72	11	12.2	0.022	29400000	0.521	0.167	0.183	0.19	4.16667	5.40771	156		2.56249	13.0608
322	2013-06-25	2013-07-02	7	12	997	1	86	90	22.72	12.2	23	24.56	0.041	11600000	1.215	0.304	1.132	0.311	7.46667	30.0913	156	16.3803	3.32071	13.8211
323	2013-06-25	2013-07-02	7	12	997	1	69	74	20.06	10.53	8	11.3	0.036	1.46	0.5	0.18	0.19	0.204	3.5	3.39317	148		2.37345	12.0973
324	2013-06-25	2013-07-02	7	12	997	1	68	74	19.74	10.86	9	12.8	0.022		0.629	0.153	0.269	0.2	4.5	6.64676	151		2.76817	14.2999
325	2013-07-02	2013-07-04	2	12	992	2	59	69	18.69	10.24	6	8.7	0.011		0.451	0.141	0.034	0.169	2.8	1.75499	138		2.49928	14.7123
326	2013-06-26	2013-07-04	8	12	996	2	75	79	21.1	11.2	12	16	0.038	7400000	0.727	0.215	0.589	0.225	5.2	9.27401	169	21.3568	2.84444	13.4273
327	2013-07-03	2013-07-04	1	12	991	1	59	70	20.04	10.51	8	8.9	0.02	5800000	0.667	0.135	0.018	0.18	3.06667	2.35523	132		2.55674	15.0505
328	2013-06-26	2013-07-04	8	12	996	2	80	80	21.36	12.11	15	18.5	0.029	4600000	0.79	0.265	0.556	0.288	4.96667	8.18539	166		2.89062	12.8587
329	2013-06-26	2013-07-04	8	12	996	2	71	74	20.33	11.01	11	12.9	0.036	10000000	0.607	0.186	0.203	0.275	4.7	7.06035	162		2.55902	12.7047
330	2013-07-02	2013-07-08	6	12	992	2	69	79	20.98	11.2	14	16.7	0.026	9200000	0.851	1.192	0.414	0.252	4.83333	7.60776	162	36.09	3.50767	17.8783
331	2013-06-27	2013-07-08	11	12	996	2	65	90	21.41	11.79	16	17.8	0.025	12000000	0.813	0.239	0.362	0.266	5.33333	9.9436	148		4.21302	22.6862
332	2013-06-27	2013-07-08	11	12	996	1	62	71	19.66	11.02	7	11.8	0.02	14600000	0.587	0.164	0.25	0.193	4.3	5.88267	149		3.06972	17.2642
333	2013-06-27	2013-07-08	11	12	996	2	75	87	22.09	12.32	15	17.8	0.025		0.812	0.267	0.472	0.269	5.26667	9.60431	160		3.16444	14.9379
334	2013-06-27	2013-07-08	11	12	996	1	70	79	20.65	11.35	12	15.2	0.036	24600000	0.644	0.196	0.452	0.235	4.73333	7.62303	145	28.78	3.10204	15.6029
335	2013-07-02	2013-07-09	7	12	992	1	67	72	19.94	10.74	9	11.2	0.028		0.568	0.147	0.22	0.206	4.06667	5.06851	148	10.93	2.49499	13.0656
336	2013-07-02	2013-07-09	7	12	992	2	68	73	21.17	11.19	8	13	0.039	28200000	0.778	0.178	0.21	0.213	3.76667	3.95163	134		2.81142	14.5233
337	2013-07-02	2013-07-09	7	12	992	2	67	78	20.61	10.98	8	12.3	0.035	34200000	0.642	0.172	0.207	0.204	3.7	3.77115	144		2.74003	14.3488
338	2013-07-03	2013-07-09	6	12	991	2	64	70	19.64	10.74	7	10.4	0.03	17800000	0.539	0.143	0.088	0.173	3.53333	3.34062	137	7.22	2.53906	13.8687
339	2013-07-02	2013-07-09	7	12	992	2	66	74	20.44	11.35	8	12.9	0.022	7600000	0.639	0.184	0.128	0.199	3.86667	4.23159	146	6.69	2.96143	15.7242
340	2013-07-02	2013-07-09	7	12	992	2	80	87	22.37	12.33	20	22.3	0.063	57000000	0.936	0.324	0.909	0.333	7.46667	27.3819	143	22.85	3.48438	15.5
341	2013-09-06	2013-09-09	3	2	795	1	65	76	20.08	9.31	15	17.5	0.03	33800000	1.283	0.205	0.228	0.263	6.63333	20.3792	129	14.44	4.14201	22.3038
342	2013-09-06	2013-09-09	3	2	795	1	72	72	20.57	10.79	9	11.9	0.021	7800000	0.666	0.144	0.12	0.207	4.56667	6.91602	133		2.29552	11.2508
343	2013-09-06	2013-09-09	3	2	795	1	70	73	20.49	10.15	11	14.2	0.017		0.714	0.139	0.146	0.22	3.8	4.2305	147		2.89796	14.5764
344	2013-09-06	2013-09-09	3	2	795	2	72	75	21.59	10.68	13	13.6	0.025		0.65	0.144	0.206	0.239	4.66667	6.92803	131		2.62346	12.8581
345	2013-09-12	2013-09-16	4	2	772	2	63	62	20.29	10.38	8	8	0.019		0.398	0.125	0.021	0.178	3.06667	2.27819	119		2.01562	11.1703
346	2013-09-12	2013-09-16	4	2	772	1	58	60	18.13	10.26	7	7.6	0.013		0.406	0.114	0.008	0.191	2.9	2.00359	113		2.25922	13.5099
347	2013-09-11	2013-09-16	5	2	776	2	62	62	19.1	10.5	7	9.4	0.014		0.473	0.117	0.084	0.19	2.36667	1.01605	136	11.91	2.44537	13.7528
348	2013-09-12	2013-09-16	4	2	772	2	63	61	19.77	10.31	7	9.3	0.026		0.427	0.12	0.047	0.224	2.96667	2.07537	113		2.34316	12.9855
349	2013-09-25	2013-09-30	5	14	722	1	68	71	18.64	9.8	10	10.9	0.024	20200000	0.545	0.142	0.035	0.218	4	4.85015	135		2.35727	12.1772
350	2013-09-27	2013-09-30	3	14	714	1	83	78	20.63	11.04	16	16.9	0.05	47600000	0.979	0.205	0.156	0.247	4.66667	7.33429	146	10.96	2.45319	10.5494
351	2013-09-24	2013-09-30	6	14	726	2	77	87	21.36	11.29	23	24.8	0.08	76800000	1.597	0.323	0.399	0.407	5.6	11.3957	112	13.97	4.18283	19.2729
352	2013-09-24	2013-09-30	6	14	726	1	57	65	17.36	10.03	7	8.7	0.014	5000000	0.615	0.128	0.033	0.177	3.13333	2.5029	141		2.67775	16.271
353	2013-09-25	2013-10-01	6	14	722	2	69	74	19.32	10.4	10	14	0.035	12200000	0.854	0.16	0.132	0.228	3.83333	4.13701	150	13.14	2.94056	14.9878
354	2013-09-25	2013-10-01	6	14	722	2	72	77	19.36	9.92	11	12.9	0.034	9000000	0.703	0.17	0.063	0.233	3.8	4.0437	145	11.84	2.48843	12.1963
355	2013-09-26	2013-10-01	5	14	718	1	73	72	19.56	10.5	10	11.1	0.036	10600000	0.609	0.143	0.027	0.197	3.9	4.53384	150	4.08	2.08294	10.0802
356	2013-09-25	2013-10-01	6	14	722	1	68	72	20.36	10.55	14	15.5	0.039	9400000	0.868	0.191	0.212	0.256	4.46667	6.51492	113	10.99	3.35208	17.3163
357	2013-09-25	2013-10-01	6	14	722	1	62	68	18.07	10.24	8	10.6	0.025		0.745	0.141	0.09	0.176	3.1	2.42855	143	6.35	2.75754	15.5085
358	2013-09-26	2013-10-01	5	14	718	1	83	89	21.26	11.03	20	20.7	0.094	29800000	1.967	0.354	0.297	0.311	5	8.86216	136	12.19	3.00479	12.9214
359	2013-09-25	2013-10-03	8	14	722	2	76	86	19.23	11.5	26	22.4	0.118	170000000	2.21	0.43	0.211	0.515	6.03333	14.1149	132	14.07	3.87812	18.0851
360	2013-09-26	2013-10-03	7	14	718	2	74	70	18.67	10.85	12	12.4	0.034	28600000	0.72	0.175	0.093	0.215	2.73333	1.63274	152		2.26443	10.8221
361	2013-09-26	2013-10-03	7	14	718	1	80	89	20.98	10.69	18	22.9	0.082	95800000	1.565	0.466	0.481	0.381	5.8	13.53	145	8.82	3.57812	15.917
362	2013-09-26	2013-10-03	7	14	718	1	68	73	17.52	9.35	10	11.9	0.02	18800000	0.649	0.176	0.195	0.361	4.03333	4.95857	146		2.57353	13.2944
363	2013-09-24	2013-10-03	9	14	726	1	85	90	21.94	11.55	20	23.5	0.059	72800000	1.59	0.368	0.409	0.389	5.76667	13.3026	152	14.21	3.2526	13.684
364	2013-09-25	2013-10-07	12	14	722	1	74	82	20.59	10.43	12	17.4	0.059	40000000	0.852	0.2	0.436	0.282	4.46667	6.51492	164	16.41	3.1775	15.1859
365	2013-09-26	2013-10-07	11	14	718	2	78	76	19.86	10.41	18	19	0.079	71000000	1.218	0.3	0.355	0.33	4.16667	5.14246	154		3.12295	14.2195
366	2013-09-24	2013-10-07	13	14	726	1	73	80	20.76	11.09	13	15.2	0.046	28800000	0.853	0.228	0.417	0.29	4.56667	6.91602	136	23.86	2.85232	13.8035
367	2013-09-25	2013-10-07	12	14	722	1	78	82	20.9	10.73	16	18.4	0.069	95400000	1.102	0.208	0.551	0.298	4.63333	7.19292	143	20.14	3.02433	13.7705
368	2013-09-26	2013-10-08	12	14	718	2	84	82	20.41	10.5	19	22	0.223	152800000	2.491	0.468	0.329	0.539	5.16667	9.11215	144	13.82	3.11791	13.261
369	2013-09-24	2013-10-08	14	14	726	1	76	81	19.77	10.9	14	19.2	0.037	44000000	1.036	0.205	0.649	0.279	4.66667	7.33429	156	27.03	3.3241	15.5015
370	2013-09-26	2013-10-08	12	14	718	2	62	72	19.75	10.56	10	13.6	0.028	23600000	0.744	0.176	0.185	0.238	4.3	5.58401	142	14.23	3.53798	19.8977
371	2013-09-24	2013-10-08	14	14	726	2	73	84	22.3	11.69	21	23	0.089	131800000	1.389	0.367	0.658	0.407	5.36667	10.1167	153	13.92	4.31601	20.8869
372	2013-10-17	2013-10-21	4	2	637	2	76	72	19.88	10.46	10	11.6	0.021	18800000	0.646	0.142	0.152	0.183	4.43333	6.04994	132		2.00831	9.3655
373	2013-10-18	2013-10-21	3	2	633	2	72	76	21.59	11.04	16	16.6	0.063	33400000	1.031	0.209	0.24	0.221	5.26667	9.60431	136	13.33	3.20216	15.6944
374	2013-10-17	2013-10-21	4	2	637	1	63	66	19.51	10.56	9	10.5	0.016		0.486	0.122	0.063	0.162	4.7	7.47765	128		2.6455	14.661
375	2013-10-16	2013-10-21	5	2	641	2	60	68	19.33	10.46	8	10.1	0.061	20800000	0.612	0.145	0.05	0.226	4.13333	5.03573	143	8.51	2.80556	16.2618
376	2013-10-18	2013-10-21	3	2	633	1	58	65	19.05	10.45	8	10.09	0.016	8800000	0.524	0.121	0.059	0.171	4.06667	5.06851	126	23.07	2.99941	17.9362
377	2013-10-17	2013-10-24	7	2	637	1	76	85	22.87	12.07	21	22.2	0.036	26800000	1.144	0.113	1.019	0.369	7.36667	28.7391	148	21.71	3.84349	17.9236
378	2013-10-17	2013-10-24	7	2	637	2	68	75	19.61	10.14	12	12.6	0.023	17000000	0.676	0.171	0.166	0.188	4.96667	8.18539	155	21.4	2.72491	14.0764
379	2013-10-17	2013-10-24	7	2	637	2	65	65	18.74	10.62	10	13.5	0.032	27400000	0.463	0.192	0.221	0.209	4.8	7.46814	151	30.3	3.19527	17.2058
380	2013-11-08	2013-11-11	3	2	556	1	80	80	21.59	10.65	19	18.487	0.028	21200000	1.563	0.206	0.091	0.253	6.33333	17.6341	125	19.92	2.88859	12.8497
381	2013-11-08	2013-11-11	3	2	556	2	57	59	17.98	9.39	8	8.2	0.012	0	0.423	0.113	0.014	0.153	4	4.62286	102		2.52385	15.3358
382	2013-11-07	2013-11-11	4	2	560	1	70	72	20.8	10.9	12	14.9	0.026	31000000	0.811	0.162	0.312	0.23	5.06667	9.1942	144	14.31	3.04082	15.295
383	2013-11-06	2013-11-11	5	2	563	1	73	89	22.78	11.93	21	24.9	0.081	56400000	2.932	0.314	0.541	0.471	7.96667	37.7718	142	13.51	4.67255	22.6123
384	2013-11-06	2013-11-11	5	2	563	1	71	83	22.17	11.84	22	22.881	0.055	35000000	3.081	0.291	0.206	0.376	8.06667	39.5106	121	29.9	4.53898	22.5346
385	2013-11-07	2013-11-14	7	2	560	2	72	75	21	11.12	15	16.4	0.094	19400000	1.512	0.262	0.245	0.261	5.26667	9.60431	149	24.57	3.16358	15.5053
386	2013-11-08	2013-11-14	6	2	556	1	65	75	20.52	11.26	14	14.1	0.03	21600000	0.721	0.177	0.204	0.229	4.8	7.91996	153	19.4	3.33728	17.9705
387	2013-11-08	2013-11-14	6	2	556	1	72	60	18.63	10.05	13	12.9	0.017	19600000	0.642	0.23	0.004	0.226			154	16.75	2.48843	12.1963
388	2013-11-08	2013-11-14	6	2	556	2	70	80	20.09	11.44	18	17.3	0.028	22800000	0.796	0.264	0.285	0.271	5.6	11.3957	175		3.53061	17.7586
389	2013-11-08	2013-11-14	6	2	556	2	74	70	20.81	11.23	14	16.7	0.644	62400000	0.913	0.216	0.304	0.245	5.3	9.77282	159	19.66	3.04967	14.575
390	2013-11-08	2013-11-19	11	2	556	1	65	75	21	10.76	13	16.8	0.032	20400000	0.821	0.187	0.723	0.287	6.2	16.5205	154	14.93	3.97633	21.4117
391	2013-11-08	2013-11-19	11	2	556	1	71	76	21.15	10.57	13	13.7	0.026		0.601	0.147	0.012	0.247	5.36667	10.8087	160	31.94	2.71771	13.4926
392	2013-11-07	2013-11-19	12	2	560	2	67	69	19.6	10.42	10	11.9	0.019	13800000	0.556	0.137	0.282	0.17	4.46667	6.17038	160	17.68	2.65092	13.8822
393	2013-11-22	2013-11-25	3	4	513	1	78	77	21.32	10.79	15	16.8	0.047	57200000	0.978	0.212	0.204	0.276	6.2	16.5205	157	7.55	2.76134	12.5731
394	2013-11-22	2013-11-25	3	4	513	1	72	70	20.74	10.14	13	15.6	0.028	36600000	1.081	0.194	0.285	0.253	5.2	9.88675	141	8.66	3.00926	14.749
395	2013-11-21	2013-11-25	4	4	516	1	66	66	20.12	10.39	12	12.1	0.018	21000000	0.62	0.152	0.123	0.211	3.33333	2.97152	151	8.79	2.77778	14.7491
396	2013-11-27	2013-12-02	5	12	501	2	75	84	21.23	11.28	17	19.5	0.05	38800000	1.027	0.297	0.26	0.32	5.66667	11.7838	133	7.4	3.46667	16.3646
397	2013-11-27	2013-12-02	5	12	501	2	73	81	22.31	11.7	15	20.6	0.042	29600000	0.947	0.286	0.46	0.346	5.53333	11.0179	135	19.04	3.86564	18.7074
398	2013-11-27	2013-12-02	5	12	501	2	74	84	23.01	12.2	16	20.5	0.05	74800000	1.068	0.293	0.408	0.32	5.8	12.5919	157	6.37	3.74361	17.8915
399	2013-11-27	2013-12-02	5	12	501	1	71	84	20.13	10.48	15	21.5	0.049	7200000	1.077	0.331	0.527	0.313	5.93333	14.4717	137	15.62	4.26503	21.1745
400	2013-12-04	2013-12-10	6	12	487	1	79	81	9	19.56	15	17.5	0.06	92400000	0.856	0.224	0.295	0.292	5.1	9.36372	157	8.14	2.80404	12.6187
401	2013-12-03	2013-12-10	7	12	488	2	72	84	20.88	10.29	14	19.6	0.029	33400000	0.93	0.256	0.361	0.3	2.7	1.57284	139	20.9	3.78086	18.5308
402	2013-12-10	2013-12-16	6	11	478	2	68	70	20.37	10.71	14	17.5	0.053	64600000	1.072	0.228	0.221	0.363	5.2	9.27401	109	14.93	3.7846	19.5506
403	2013-12-10	2013-12-16	6	11	478	2	62	68	18.4	9.73	8	11.1	0.021	17400000	0.621	0.152	0.038	0.18	3.8	4.0437	151	4.18	2.88762	16.2401
404	2013-12-10	2013-12-16	6	11	478	2	73	76	20.8	11.29	16	20	0.073	101800000	1.18	0.258	0.24	0.284	4.7	7.06035	155	10.92	3.75305	18.1625
405	2013-12-11	2013-12-17	6	11	477	1	65	69	19.28	10.03	8	13.1	0.035	11600000	0.167	0.839	0.06	0.289	3.53333	3.4811	119	13.68	3.10059	16.696
406	2013-12-10	2013-12-17	7	11	478	2	88	88	21.65	11.39	19	22.1	0.05	18200000	1.162	0.273	0.327	0.291	7	22.1983	159	2.18	2.85382	11.6292
407	2013-12-10	2013-12-17	7	11	478	2	75	77	20.38	10.51	11	17	0.039	59200000	0.975	0.219	0.267	0.269	4.73333	7.19446	157	16.2	3.02222	14.2665
408	2013-12-10	2013-12-17	7	11	478	2	80	85	21.59	10.71	17	21.2	0.051	65000000	1.098	0.22	0.201	0.287	5.73333	12.1824	155	5.85	3.3125	14.7354
409	2014-02-04	2014-02-06	2	2	560	1	78	81	20.33	10.79	19	21.832	0.04	23400000	1.543	0.286		0.376	6.73333	21.3737	141	5.35	3.58843	16.339
410	2014-02-05	2014-02-06	1	2	564	1	62	60	19.03	10.17	10	10.6	0.04		0.468	0.167	0.009	0.223	3.76667	4.13218	144	1.25	2.75754	15.5085
411	2014-02-10	2014-02-11	1	2	582	2	57	58	19.65	9.73	10	11.2	0.017	12600000	0.432	0.156	0.025	0.217	3.66667	3.68272	133	0.01	3.44721	20.9465
412	2014-02-05	2014-02-06	1	2	564	1	52	62	17.14	10.21	7	6.8	0.013		0.29	0.099	0.022	0.176	3.33333	2.97152	148	2.42	2.51479	16.6275
413	2014-02-04	2014-02-06	2	2	560	1	61	61	18.09	9.84	8	10	0.016	8000000	0.474	0.147	0.039	0.178	3.1	2.42855	143	3.38	2.68745	15.3421
414	2014-02-04	2014-02-10	6	2	560	1	73	80	20.87	10.81	20	21.088	0.036	27200000	1.591	0.236	0.227	0.267	6	14.9626	148	15.38	3.95722	19.1505
415	2014-02-04	2014-02-10	6	2	560	2	83	79	20.56	10.54	15	18.3	0.037	28200000	0.87	0.241	0.33	0.271	5.4	10.2921	155	10.73	2.65641	11.4233
416	2014-02-04	2014-02-10	6	2	560	2	72	82	21.32	10.49	17	18.1	0.037	22600000	0.863	0.276	0.335	0.236	5.66667	11.7838	165	2.17	3.49151	17.1126
417	2014-02-06	2014-02-10	4	2	568	2	67	50	19.92	11.01	11	13.4	0.025	25400000	0.772	0.17	0.133	0.187	5.03333	8.48605	152	2.9	2.98507	15.632
418	2014-02-06	2014-02-10	4	2	568	2	76	83	21.88	12.08	18	20.1	0.034	4800000	1.02	0.271	0.357	0.259	6.46667	17.353	167	12.57	3.47992	16.2281
419	2014-02-05	2014-02-11	6	2	564	1	79	76	21.12	11	19	21.4	0.048	37200000	1.253	0.244	0.842	0.299	5.96667	14.7154	162	18.43	3.42894	15.4309
420	2014-02-06	2014-02-11	5	2	568	2	76	64	20.68	11.42	15	17.1	0.048	21200000	0.933	0.223	0.242	0.265	2.53333	1.2851	157	5.8	2.96053	13.806
421	2014-02-04	2014-02-11	7	2	560	1	71	70	19.96	10.76	11	14	0.032	20800000	0.79	0.153	0.368	0.191	5.4	11.0009	150	14.31	2.77723	13.788
422	2014-02-04	2014-02-11	7	2	560	1	65	77	21.76	11.59	15	16.3	0.068	48200000	1.448	0.191	0.379	0.288	5.36667	10.8087	144	18.28	3.85799	20.7744
423	2014-02-04	2014-02-11	7	2	560	1	66	70	18.04	10.83	11	12.3	0.02	15800000	0.522	0.15	0.226	0.174	4.83333	8.07156	147	4.4	2.82369	14.9929
424	2014-02-06	2014-02-13	7	2	568	1	60	71	20.93	10.49	11	13.5	0.031	38000000	0.708	0.186	0.231	0.216	4.86667	8.22529	153	12.85	3.75	21.736
425	2014-02-06	2014-02-13	7	2	568	1	69	73	19.51	10.49	12	14	0.05	48400000	1.279	0.214	0.167	0.231	4.93333	8.53928	142	9	2.94056	14.9878
426	2014-02-06	2014-02-13	7	2	568	2	70	66	19.85	10.4	13	14.4	0.014	9000000	0.644	0.187	0.221	0.183	4.46667	6.17038	160	11.83	2.93878	14.7817
427	2014-02-05	2014-02-13	8	2	564	2	73	65	20.29	10.81	15	14.8	0.035	33400000	0.772	0.208	0.226	0.227	4.86667	7.74927	170	4.53	2.77726	13.4403
428	2014-02-05	2014-02-13	8	2	564	2	65	58	18.24	10.48	11	11.5	0.022	6200000	0.644	0.163	0.128	0.453	3.73333	3.86078	145	16.42	2.72189	14.6568
429	2014-02-11	2014-02-17	6	2	585	2	60	63	18.53	10.16	7	9.6	0.012	5200000	0.566	0.118	0.054	0.167	3.96667	4.52307	134	4.04	2.66667	15.4567
430	2014-02-11	2014-02-17	6	2	585	2	82	73	20.52	10.79	15	17	0.039	20600000	0.912	0.212	0.295	0.257	5.73333	12.1824	167	4.86	2.52826	10.9941
431	2014-02-11	2014-02-17	6	2	585	1	69	67	19.33	10.66	10	12.6	0.024	20600000	0.787	0.166	0.179	0.217	4.53333	6.78045	151	12.57	2.6465	13.489
432	2014-02-05	2014-02-17	12	2	564	1	69	65	19.83	9.75	11	14	0.03	18400000	0.753	0.168	0.37	0.198	4.96667	8.6996	142	18.43	2.94056	14.9878
433	2014-02-05	2014-02-17	12	2	564	1	79	73	20.31	10.75	14	15.2	0.067	73600000	1.137	0.215	0.353	0.261	5	8.86216	156	10.97	2.43551	10.9603
434	2014-02-12	2014-02-19	7	2	589	2	67	66	20.06	11.26	15	14.7	0.038	38400000	0.887	0.208	0.042	0.259	5.5	10.8328	140	3.92	3.27467	17.1485
435	2014-02-12	2014-02-19	7	2	589	1	79	87	22.65	12.01	18	22	0.032	12800000	1.117	0.282	0.966	0.381	7.9	36.6524	130	14.86	3.52508	15.8635
436	2014-02-11	2014-02-19	8	2	585	2	83	75	20.19	11.54	17	19.3	0.047	7000000	0.826	0.305	0.331	0.266	5.86667	13.0126	139	5.32	2.80157	12.0475
437	2014-02-12	2014-02-20	8	2	589	1	73	78	20.86	11.15	20	20.013	0.071	25700000	2.171	0.272	0.175	0.303	5.73333	13.0785	153	13.74	3.75549	18.1743
438	2014-02-12	2014-02-20	8	2	589	2	72	77	20.04	11.25	18	18.6	0.025	15400000	0.971	0.306	0.293	0.321	5.3	9.77282	169	5.81	3.58796	17.5853
439	2014-02-12	2014-02-20	8	2	589	2	86	80	20.35	10.59	14	16.2	0.023	18800000	0.771	0.121	0.348	0.281	5.13333	8.95246	167	7.76	2.19037	9.1165
440	2014-02-12	2014-02-20	8	2	589	2	81	78	20.49	11.42	17	18.3	0.03	30000000	0.857	0.261	0.409	0.248	6.03333	14.1149	172	9.33	2.78921	12.2666
441	2014-02-26	2014-02-28	2	3	642	2	82	83	20.94	10.33		16					0.081		7.3	25.4178	139		2.37954	10.3474
442	2014-02-28	2014-02-28	0	3	642	1	79	78	21.65	10.82	21	19.316					0.388		6.9	23.1266	115		3.09502	13.9282
443	2014-03-04	2014-03-10	6	2	666	2	70	75	20.22	10.36	14	17.4	0.042	24600000	0.901	0.204	0.328	0.276	5.53333	11.0179	162	11.52	3.55102	17.8612
444	2014-03-04	2014-03-10	6	2		1	69	69	19.23	10.04							0.266		4.7	7.47765		12.4	1.15522
445	2014-03-05	2014-03-10	5	2	669	1	59	60	16.02	9.93	7	9.2	0.016	14200000	0.175	0.124	0.036	0.513	3.43333	3.22097	117	3.13	2.64292	15.5578
446	2014-03-06	2014-03-10	4	2	674	2	83	72	20.17	10.84	12	14.1	0.02	30800000	0.722	0.171	0.145	0.275	3.96667	4.52307	131	6.54	2.04674	8.80156
447	2014-03-07	2014-03-11	4	2	678	1	65	63	19.87	10.18	8	11.3	0.037	4000000	0.682	0.126	0.041	0.204	4.03333	4.95857	102	5.62	2.67456	14.4019
448	2014-03-06	2014-03-11	5	2	674	2	72	80	21.47	10.68	18	18.3	0.033	26800000	0.087	0.256	0.246	0.306	5.93333	13.4446	174	2.48	3.53009	17.3017
449	2014-03-05	2014-03-11	6	2	669	1	74	80	21.95	10.44	16	19.3	0.067	47000000	1.57	0.222	0.185	0.316	5.46667	11.3935	147	7.9	3.52447	16.8442
450	2014-03-04	2014-03-11	7	2	666	1	76	85	21.82	11.36	17	19.8	0.038	18200000	1.371	0.227	0.562	0.284	7.73333	33.987	157	5.01	3.42798	15.9859
451	2014-03-12	2014-03-27	15	12	697	2	73	90	21.73	11.17	19	21.6	0.048	45600000	0.877	0.329	0.667	0.265	6.53333	17.9032	153	11.2	4.05329	19.6155
452	2014-03-20	2014-03-27	7	12	729	2	72	89	21.6	11.46	20	24	0.073	56600000	1.272	0.44	0.545	0.315	7.56667	28.6253	150	12.67	4.62963	22.6907
453	2014-03-11	2014-03-27	16	12	693	2	86	85	20.78	11.38	19	20.9	0.05	31400000	0.94	0.326	0.472	0.336	7.53333	28.2053	153	4.93	2.82585	11.7614
454	2014-03-20	2014-03-27	7	11	729	2	73	82	21.21	11.24	14	14.9	0.028	25000000	0.642	0.233	0.226	0.269	5.13333	8.95246	163	4.54	2.79602	13.5311
455	2014-04-25	2014-04-30	5	14	748	1	93	97	21.18	11.46	34	28.3	0.213	72200000	2.206	0.429	0.115	0.021	6.56667	19.7391	140	5.08	3.27205	12.6726
456	2014-04-23	2014-04-30	7	14	741	2	85	82	21.65	11.08	20	21.3	0.06	43600000	1.493	0.384	0.293	0.331	5.76667	12.3858	148	6.43	2.9481	12.4029
457	2014-04-23	2014-04-30	7	14	741	1	82	72	20.39	10.34	19	19.7	0.26	65800000	1.361	0.364	0.202	0.324	5.73333	13.0785	110	5.79	2.9298	12.7403
458	2014-04-23	2014-04-30	7	14	741	1	79	80	21.38	11.19	24	22.48	0.087	39200000	1.916	0.345	0.143	0.387	7.13333	25.7958	144	6.65	3.60199	16.2097
459	2014-04-23	2014-04-30	7	14	741	1	80	84	22.41	11.73	25	23.5	0.175	67800000	2.58	0.418	0.682	0.385	7.23333	27.022	136	4.33	3.67188	16.334
460	2014-04-24	2014-05-01	7	14	744	1	85	85	21.17	11.45	14	25.9	0.106	54400000	2.389	0.483	0.349	0.396	6.66667	20.7061	136	3.54	3.58478	15.0815
461	2014-04-24	2014-05-01	7	14	744	1	85	90	21.48	11.52	23	23.4	0.1	64800000	2.034	0.386	0.643	0.347	6.33333	17.6341	141	6.01	3.23875	13.6258
462	2014-04-23	2014-05-01	8	14	741	1	80	95	22.33	11.85	21	23.74	0.08	76400000	2.005	0.398	0.277	0.333	6.36667	17.9224	135	12.76	3.70937	16.5009
463	2014-04-23	2014-05-01	8	14	741	1	77	86	22.63	11.07	21	22.3	0.068	77600000	1.889	0.366	0	0.359	6.43333	18.5111	140	6.98	3.76117	17.3301
464	2014-04-25	2014-05-01	6	14	748	2	88	80	22.11	10.02	23	24.2	0.09	57600000	1.896	0.486	0.333	0.402	6.3	16.0403	130	3.77	3.125	12.7343
